# Supplementary material for: A framework for quantitative in situ evaluation of coupled substitutions between H+ and trace elements in natural rutile
Source: Copernicus journal article supplement (doi:10.5194/ejm-35-243-2023), 2023-04-05
Supplement: Supplementary file 1 [file ejm-35-243-2023-supplement.zip]

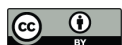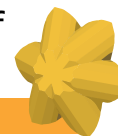

*Supplement of*

**A framework for quantitative in situ evaluation of coupled substitutions between  $H^+$  and trace elements in natural rutile**

**Mona Lueder et al.**

*Correspondence to:* Mona Lueder ([mona.lueder@geo.unibe.ch](mailto:mona.lueder@geo.unibe.ch))

- [ejm-35-243-2023-supplement-title-page.pdf](#)
- [TableS1.xlsx](#)

The copyright of individual parts of the supplement might differ from the article licence.
