# Supplementary material for: A framework for quantitative in situ evaluation of coupled substitutions between H+ and trace elements in natural rutile
Source: Copernicus journal article supplement (doi:10.5194/ejm-35-243-2023), 2023-04-05
Supplement: Supplementary file 1 [file TableS1.xlsx]

## Sheet: Basline corrected spectra
Table S1: Baseline corrected average FTIR spectra of polarised and unpolarised in situ measurements. First colum for each polarised and unpolarised spectrum gives wavenumbers in cm-1, second colum gives absorbance. Absorbances have not been normalised.
AA16-11					AS19-1					AS19-2					AS19-3					CP16-03B					DM1c					PF18-14					SY21-31
polarised		unpolarised			polarised		unpolarised			polarised		unpolarised			polarised		unpolarised			polarised		unpolarised			polarised		unpolarised			polarised		unpolarised			polarised
3997.41	0.00495	3997.41	0.00447		3997.41	0.00655	3997.41	0.00676		3997.41	0.00767	3997.41	0.00575		3997.41	0.01797	3997.41	0.01453		3997.41	0.0067	3997.41	0.00461		3994.57	0.00652	3994.57	0.00398		3997.41	0.01005	3997.41	0.01024		3991.82	0.00439
3995.98	0.00499	3995.98	0.00426		3995.98	0.00586	3995.98	0.00616		3995.98	0.00736	3995.98	0.00563		3995.98	0.01811	3995.98	0.01472		3995.98	0.00598	3995.98	0.00412		3991.71	0.00552	3991.71	0.00424		3995.98	0.01042	3995.98	0.01036		3988.97	0.00485
3994.55	0.00503	3994.55	0.00412		3994.55	0.0053	3994.55	0.00556		3994.55	0.00716	3994.55	0.00552		3994.55	0.0178	3994.55	0.01455		3994.55	0.00539	3994.55	0.00367		3988.85	0.00438	3988.85	0.00383		3994.55	0.01043	3994.55	0.01018		3986.11	0.00475
3993.12	0.00504	3993.12	0.00411		3993.12	0.005	3993.12	0.00504		3993.12	0.00712	3993.12	0.00545		3993.12	0.01697	3993.12	0.01396		3993.12	0.00509	3993.12	0.00335		3985.99	0.00379	3985.99	0.0028		3993.12	0.00987	3993.12	0.00958		3983.25	0.00429
3991.69	0.00503	3991.69	0.00422		3991.69	0.00502	3991.69	0.00474		3991.69	0.00718	3991.69	0.00542		3991.69	0.01582	3991.69	0.0131		3991.69	0.00518	3991.69	0.00321		3983.13	0.00381	3983.13	0.00192		3991.69	0.00881	3991.69	0.00868		3980.39	0.00406
3990.26	0.00495	3990.26	0.00436		3990.26	0.00534	3990.26	0.00476		3990.26	0.00722	3990.26	0.0054		3990.26	0.01449	3990.26	0.01207		3990.26	0.00556	3990.26	0.00323		3980.27	0.00404	3980.27	0.00184		3990.26	0.00748	3990.26	0.0077		3977.54	0.00427
3988.83	0.00473	3988.83	0.00441		3988.83	0.00577	3988.83	0.00501		3988.83	0.00711	3988.83	0.00531		3988.83	0.01306	3988.83	0.01097		3988.83	0.00599	3988.83	0.00331		3977.41	0.00409	3977.41	0.00245		3988.83	0.00618	3988.83	0.00678		3974.68	0.00459
3987.4	0.00438	3987.4	0.00432		3987.4	0.00605	3987.4	0.00525		3987.4	0.00683	3987.4	0.00508		3987.4	0.01164	3987.4	0.00986		3987.4	0.00623	3987.4	0.00332		3974.55	0.00378	3974.55	0.00291		3987.4	0.00515	3987.4	0.00596		3971.82	0.00467
3985.97	0.00399	3985.97	0.00412		3985.97	0.00599	3985.97	0.00527		3985.97	0.00642	3985.97	0.00472		3985.97	0.01042	3985.97	0.00887		3985.97	0.0062	3985.97	0.00327		3971.69	0.00307	3971.69	0.00247		3985.97	0.00461	3985.97	0.00536		3968.97	0.00458
3984.54	0.00368	3984.54	0.00388		3984.54	0.00563	3984.54	0.00508		3984.54	0.006	3984.54	0.00434		3984.54	0.00959	3984.54	0.00818		3984.54	0.00603	3984.54	0.00328		3968.83	0.00231	3968.83	0.00132		3984.54	0.00476	3984.54	0.00528		3966.11	0.00449
3983.11	0.00357	3983.11	0.00366		3983.11	0.00513	3983.11	0.00478		3983.11	0.00571	3983.11	0.00404		3983.11	0.00935	3983.11	0.00796		3983.11	0.0059	3983.11	0.00345		3965.97	0.00206	3965.97	0.0005		3983.11	0.00571	3983.11	0.00593		3963.25	0.00446
3981.68	0.00365	3981.68	0.00347		3981.68	0.00467	3981.68	0.00447		3981.68	0.00558	3981.68	0.0039		3981.68	0.00975	3981.68	0.00827		3981.68	0.00583	3981.68	0.00369		3963.11	0.00249	3963.11	0.00084		3981.68	0.00725	3981.68	0.00713		3960.39	0.00445
3980.25	0.00383	3980.25	0.00329		3980.25	0.00428	3980.25	0.00412		3980.25	0.00554	3980.25	0.00384		3980.25	0.01065	3980.25	0.00898		3980.25	0.00565	3980.25	0.00377		3960.25	0.00295	3960.25	0.00201		3980.25	0.00881	3980.25	0.00829		3957.54	0.00456
3978.82	0.00404	3978.82	0.0031		3978.82	0.00392	3978.82	0.00368		3978.82	0.00548	3978.82	0.00377		3978.82	0.0119	3978.82	0.00993		3978.82	0.00524	3978.82	0.00352		3957.4	0.00259	3957.4	0.0028		3978.82	0.00976	3978.82	0.00883		3954.68	0.00488
3977.39	0.00425	3977.39	0.00297		3977.39	0.00366	3977.39	0.00324		3977.39	0.00541	3977.39	0.00369		3977.39	0.01334	3977.39	0.01099		3977.39	0.0047	3977.39	0.00297		3954.54	0.00148	3954.54	0.00232		3977.39	0.00974	3977.39	0.00856		3951.82	0.00533
3975.96	0.00446	3975.96	0.00298		3975.96	0.00364	3975.96	0.00299		3975.96	0.0054	3975.96	0.00369		3975.96	0.0148	3975.96	0.0121		3975.96	0.00428	3975.96	0.00238		3951.68	0.00054	3951.68	0.00094		3975.96	0.00885	3975.96	0.0077		3948.97	0.00572
3974.53	0.00464	3974.53	0.00315		3974.53	0.00393	3974.53	0.00306		3974.53	0.00548	3974.53	0.00377		3974.53	0.01613	3974.53	0.01315		3974.53	0.00417	3974.53	0.00197		3948.82	0.00078	3948.82	-8e-05		3974.53	0.0074	3974.53	0.00656		3946.11	0.00594
3973.1	0.00471	3973.1	0.00344		3973.1	0.00443	3973.1	0.00337		3973.1	0.00557	3973.1	0.00385		3973.1	0.01721	3973.1	0.014		3973.1	0.00438	3973.1	0.00181		3945.96	0.00223	3945.96	0.00017		3973.1	0.00574	3973.1	0.00541		3943.25	0.00604
3971.67	0.00464	3971.67	0.0037		3971.67	0.0049	3971.67	0.00375		3971.67	0.00557	3971.67	0.00379		3971.67	0.01795	3971.67	0.01451		3971.67	0.00477	3971.67	0.00184		3943.1	0.00372	3943.1	0.00134		3971.67	0.00418	3971.67	0.00439		3940.39	0.00612
3970.24	0.00442	3970.24	0.00381		3970.24	0.00517	3970.24	0.00403		3970.24	0.00543	3970.24	0.00358		3970.24	0.01814	3970.24	0.01453		3970.24	0.00517	3970.24	0.00196		3940.24	0.00394	3940.24	0.00222		3970.24	0.00302	3970.24	0.00369		3937.54	0.00627
3968.82	0.00406	3968.82	0.0037		3968.82	0.00517	3968.82	0.00411		3968.82	0.00518	3968.82	0.00329		3968.82	0.0176	3968.82	0.01396		3968.82	0.0054	3968.82	0.00209		3937.38	0.00285	3937.38	0.00192		3968.82	0.00252	3968.82	0.00347		3934.68	0.00645
3967.39	0.00363	3967.39	0.00341		3967.39	0.00491	3967.39	0.00396		3967.39	0.0049	3967.39	0.00303		3967.39	0.01637	3967.39	0.01285		3967.39	0.00537	3967.39	0.00219		3934.52	0.00169	3934.52	0.0007		3967.39	0.00278	3967.39	0.00379		3931.82	0.00659
3965.96	0.00325	3965.96	0.00301		3965.96	0.00449	3965.96	0.00363		3965.96	0.00469	3965.96	0.00289		3965.96	0.01475	3965.96	0.01141		3965.96	0.00508	3965.96	0.00222		3931.66	0.00166	3931.66	-0.00029		3965.96	0.00376	3965.96	0.00453		3928.96	0.00675
3964.53	0.00302	3964.53	0.00263		3964.53	0.00405	3964.53	0.00322		3964.53	0.00462	3964.53	0.00291		3964.53	0.01313	3964.53	0.00993		3964.53	0.00461	3964.53	0.00216		3928.8	0.00263	3928.8	-0.00019		3964.53	0.00521	3964.53	0.00547		3926.11	0.00714
3963.1	0.003	3963.1	0.00234		3963.1	0.00365	3963.1	0.00281		3963.1	0.00463	3963.1	0.00305		3963.1	0.01168	3963.1	0.00859		3963.1	0.00401	3963.1	0.002		3925.94	0.00353	3925.94	0.00071		3963.1	0.00672	3963.1	0.00636		3923.25	0.0077
3961.67	0.00315	3961.67	0.00216		3961.67	0.00325	3961.67	0.00238		3961.67	0.00466	3961.67	0.00317		3961.67	0.01042	3961.67	0.0075		3961.67	0.00338	3961.67	0.00176		3923.08	0.00369	3923.08	0.00146		3961.67	0.00781	3961.67	0.00694		3920.39	0.00804
3960.24	0.00339	3960.24	0.00209		3960.24	0.00286	3960.24	0.00196		3960.24	0.00465	3960.24	0.00318		3960.24	0.00947	3960.24	0.0068		3960.24	0.00291	3960.24	0.00148		3920.22	0.00314	3920.22	0.00136		3960.24	0.0081	3960.24	0.00701		3917.54	0.00797
3958.81	0.00365	3958.81	0.00214		3958.81	0.00265	3958.81	0.00166		3958.81	0.00465	3958.81	0.00312		3958.81	0.00909	3958.81	0.00667		3958.81	0.00273	3958.81	0.00122		3917.36	0.00226	3917.36	0.00059		3958.81	0.00755	3958.81	0.0065		3914.68	0.0078
3957.38	0.00388	3957.38	0.00228		3957.38	0.00279	3957.38	0.00158		3957.38	0.00467	3957.38	0.00305		3957.38	0.00937	3957.38	0.00713		3957.38	0.00288	3957.38	0.00107		3914.5	0.00173	3914.5	-1e-05		3957.38	0.00642	3957.38	0.00555		3911.82	0.0079
3955.95	0.00402	3955.95	0.00247		3955.95	0.00325	3955.95	0.0017		3955.95	0.00468	3955.95	0.00296		3955.95	0.01016	3955.95	0.00804		3955.95	0.00321	3955.95	0.00103		3911.65	0.0021	3911.65	2e-05		3955.95	0.00504	3955.95	0.00438		3908.96	0.00833
3954.52	0.00401	3954.52	0.00261		3954.52	0.0038	3954.52	0.00188		3954.52	0.00456	3954.52	0.00276		3954.52	0.01127	3954.52	0.00921		3954.52	0.00352	3954.52	0.00103		3908.79	0.00318	3908.79	0.00043		3954.52	0.00366	3954.52	0.00322		3906.11	0.00887
3953.09	0.00385	3953.09	0.00265		3953.09	0.0042	3953.09	0.00201		3953.09	0.00433	3953.09	0.00247		3953.09	0.01266	3953.09	0.01051		3953.09	0.00374	3953.09	0.00102		3905.93	0.00416	3905.93	0.00073		3953.09	0.00255	3953.09	0.00234		3903.25	0.00922
3951.66	0.00355	3951.66	0.00255		3951.66	0.00437	3951.66	0.00213		3951.66	0.00405	3951.66	0.00218		3951.66	0.01428	3951.66	0.01183		3951.66	0.00393	3951.66	0.00106		3903.07	0.0042	3903.07	0.00065		3951.66	0.00205	3951.66	0.002		3900.39	0.00919
3950.23	0.00318	3950.23	0.00233		3950.23	0.00436	3950.23	0.00225		3950.23	0.00378	3950.23	0.00203		3950.23	0.01585	3950.23	0.01298		3950.23	0.00418	3950.23	0.00121		3900.21	0.00335	3900.21	0.00028		3950.23	0.00249	3950.23	0.00242		3897.54	0.00889
3948.8	0.00279	3948.8	0.00202		3948.8	0.00416	3948.8	0.00229		3948.8	0.00351	3948.8	0.00199		3948.8	0.01688	3948.8	0.01365		3948.8	0.00439	3948.8	0.00149		3897.35	0.00275	3897.35	0		3948.8	0.00385	3948.8	0.00352		3894.68	0.00849
3947.37	0.00248	3947.37	0.00169		3947.37	0.00373	3947.37	0.00213		3947.37	0.00325	3947.37	0.00198		3947.37	0.01711	3947.37	0.01365		3947.37	0.00439	3947.37	0.00177		3894.49	0.00287	3894.49	0.00012		3947.37	0.0056	3947.37	0.00484		3891.82	0.00808
3945.94	0.00237	3945.94	0.00143		3945.94	0.00317	3945.94	0.00178		3945.94	0.00312	3945.94	0.00196		3945.94	0.01689	3945.94	0.01314		3945.94	0.00413	3945.94	0.00187		3891.63	0.00332	3891.63	0.0007		3945.94	0.00703	3945.94	0.00583		3888.96	0.00777
3944.51	0.00254	3944.51	0.00134		3944.51	0.00274	3944.51	0.00145		3944.51	0.00327	3944.51	0.00199		3944.51	0.0166	3944.51	0.01236		3944.51	0.00379	3944.51	0.00174		3888.77	0.0033	3888.77	0.00151		3944.51	0.00778	3944.51	0.00626		3886.11	0.00771
3943.08	0.00295	3943.08	0.00144		3943.08	0.00269	3943.08	0.00132		3943.08	0.00366	3943.08	0.00206		3943.08	0.01601	3943.08	0.01126		3943.08	0.00352	3943.08	0.00149		3885.91	0.00232	3885.91	0.00192		3943.08	0.00789	3943.08	0.00625		3883.25	0.00783
3941.65	0.00345	3941.65	0.00169		3941.65	0.003	3941.65	0.0014		3941.65	0.00408	3941.65	0.00215		3941.65	0.0148	3941.65	0.00983		3941.65	0.00332	3941.65	0.00117		3883.05	0.00119	3883.05	0.00175		3941.65	0.00743	3941.65	0.00591		3880.39	0.00786
3940.22	0.0039	3940.22	0.00203		3940.22	0.00346	3940.22	0.00154		3940.22	0.00436	3940.22	0.00222		3940.22	0.0133	3940.22	0.00846		3940.22	0.00316	3940.22	0.00081		3880.19	0.00111	3880.19	0.00128		3940.22	0.00636	3940.22	0.00518		3877.54	0.00785
3938.79	0.0042	3938.79	0.00237		3938.79	0.00385	3938.79	0.00162		3938.79	0.00444	3938.79	0.00226		3938.79	0.01196	3938.79	0.00749		3938.79	0.00302	3938.79	0.0004		3877.33	0.00208	3877.33	0.00089		3938.79	0.00467	3938.79	0.00403		3874.68	0.00815
3937.36	0.00427	3937.36	0.0026		3937.36	0.00402	3937.36	0.00159		3937.36	0.00428	3937.36	0.00221		3937.36	0.01083	3937.36	0.00691		3937.36	0.00286	3937.36	-3e-05		3874.47	0.00289	3874.47	0.00078		3937.36	0.00263	3937.36	0.00263		3871.82	0.00886
3935.93	0.00409	3935.93	0.00262		3935.93	0.00387	3935.93	0.00143		3935.93	0.00389	3935.93	0.00201		3935.93	0.00994	3935.93	0.00665		3935.93	0.0027	3935.93	-0.00043		3871.61	0.00241	3871.61	0.00102		3935.93	0.00071	3935.93	0.00128		3868.96	0.00961
3934.5	0.00372	3934.5	0.00244		3934.5	0.00341	3934.5	0.00116		3934.5	0.00333	3934.5	0.0017		3934.5	0.0096	3934.5	0.00687		3934.5	0.00258	3934.5	-0.00074		3868.75	0.00079	3868.75	0.00135		3934.5	-0.00047	3934.5	0.00035		3866.11	0.01
3933.07	0.00326	3933.07	0.00213		3933.07	0.00284	3933.07	0.00088		3933.07	0.00276	3933.07	0.00136		3933.07	0.00999	3933.07	0.00768		3933.07	0.00252	3933.07	-0.00079		3865.89	-0.00036	3865.89	0.00137		3933.07	-0.00035	3933.07	0.0002		3863.25	0.00981
3931.64	0.00284	3931.64	0.00178		3931.64	0.00243	3931.64	0.0007		3931.64	0.00235	3931.64	0.00107		3931.64	0.01096	3931.64	0.00902		3931.64	0.00248	3931.64	-0.00045		3863.04	-5e-05	3863.04	0.00114		3931.64	0.00119	3931.64	0.001		3860.39	0.00922
3930.21	0.00252	3930.21	0.00144		3930.21	0.00226	3930.21	0.00063		3930.21	0.00223	3930.21	0.00091		3930.21	0.0122	3930.21	0.01059		3930.21	0.00239	3930.21	0.00017		3860.18	0.00108	3860.18	0.00101		3930.21	0.00359	3930.21	0.00241		3857.53	0.00862
3928.78	0.00236	3928.78	0.00115		3928.78	0.0022	3928.78	0.00055		3928.78	0.00236	3928.78	0.00087		3928.78	0.01356	3928.78	0.01203		3928.78	0.00222	3928.78	0.00071		3857.32	0.00223	3857.32	0.00104		3928.78	0.00584	3928.78	0.00378		3854.68	0.00837
3927.35	0.00236	3927.35	0.00098		3927.35	0.00209	3927.35	0.00037		3927.35	0.00264	3927.35	0.00094		3927.35	0.01508	3927.35	0.01318		3927.35	0.00205	3927.35	0.0009		3854.46	0.00305	3854.46	0.0012		3927.35	0.0072	3927.35	0.00462		3851.82	0.00827
3925.92	0.00257	3925.92	0.00101		3925.92	0.00201	3925.92	0.00021		3925.92	0.00295	3925.92	0.00109		3925.92	0.01655	3925.92	0.01388		3925.92	0.00199	3925.92	0.00076		3851.6	0.00331	3851.6	0.00146		3925.92	0.0075	3925.92	0.00487		3848.96	0.00803
3924.49	0.00293	3924.49	0.00126		3924.49	0.00225	3924.49	0.00028		3924.49	0.00323	3924.49	0.00135		3924.49	0.01738	3924.49	0.01392		3924.49	0.00216	3924.49	0.00059		3848.74	0.00301	3848.74	0.00144		3924.49	0.00701	3924.49	0.00476		3846.11	0.00799
3923.07	0.00337	3923.07	0.0017		3923.07	0.00287	3923.07	0.00061		3923.07	0.00352	3923.07	0.00174		3923.07	0.01741	3923.07	0.01335		3923.07	0.00256	3923.07	0.00062		3845.88	0.00266	3845.88	0.00107		3923.07	0.00604	3923.07	0.00444		3843.25	0.00863
3921.64	0.00385	3921.64	0.00222		3921.64	0.0036	3921.64	0.00101		3921.64	0.0038	3921.64	0.0022		3921.64	0.01713	3921.64	0.01252		3921.64	0.00307	3921.64	0.00081		3843.02	0.00267	3843.02	0.00076		3921.64	0.00478	3921.64	0.00388		3840.39	0.0099
3920.21	0.00426	3920.21	0.00265		3920.21	0.00413	3920.21	0.00131		3920.21	0.00398	3920.21	0.00252		3920.21	0.01689	3920.21	0.01164		3920.21	0.00351	3920.21	0.00103		3840.16	0.00323	3840.16	0.00087		3920.21	0.00361	3920.21	0.0031		3837.53	0.0109
3918.78	0.00451	3918.78	0.0029		3918.78	0.0043	3918.78	0.00149		3918.78	0.00391	3918.78	0.00255		3918.78	0.01646	3918.78	0.01064		3918.78	0.00378	3918.78	0.00121		3837.3	0.00368	3837.3	0.00135		3918.78	0.00301	3918.78	0.0024		3834.68	0.01097
3917.35	0.00453	3917.35	0.00295		3917.35	0.00409	3917.35	0.00153		3917.35	0.00355	3917.35	0.0022		3917.35	0.01554	3917.35	0.00952		3917.35	0.00389	3917.35	0.0014		3834.44	0.00359	3834.44	0.00167		3917.35	0.00321	3917.35	0.00214		3831.82	0.01046
3915.92	0.00437	3915.92	0.00286		3915.92	0.00365	3915.92	0.0014		3915.92	0.00302	3915.92	0.00163		3915.92	0.01429	3915.92	0.00858		3915.92	0.00392	3915.92	0.00161		3831.58	0.00341	3831.58	0.00161		3915.92	0.00394	3915.92	0.00246		3828.96	0.01001
3914.49	0.00412	3914.49	0.0027		3914.49	0.00318	3914.49	0.00116		3914.49	0.00253	3914.49	0.0011		3914.49	0.01322	3914.49	0.00819		3914.49	0.00392	3914.49	0.0018		3828.72	0.00377	3828.72	0.00147		3914.49	0.00479	3914.49	0.00319		3826.11	0.00986
3913.06	0.00388	3913.06	0.00254		3913.06	0.00285	3913.06	0.00093		3913.06	0.00227	3913.06	0.00081		3913.06	0.01272	3913.06	0.00848		3913.06	0.00386	3913.06	0.00189		3825.86	0.00448	3825.86	0.00137		3913.06	0.00559	3913.06	0.00404		3823.25	0.01008
3911.63	0.00364	3911.63	0.00237		3911.63	0.00266	3911.63	0.00078		3911.63	0.00222	3911.63	0.00077		3911.63	0.01256	3911.63	0.00922		3911.63	0.00364	3911.63	0.00185		3823	0.00478	3823	0.00129		3911.63	0.00635	3911.63	0.00479		3820.39	0.01041
3910.2	0.00335	3910.2	0.00214		3910.2	0.00259	3910.2	0.00067		3910.2	0.00235	3910.2	0.0009		3910.2	0.01235	3910.2	0.01		3910.2	0.00322	3910.2	0.00165		3820.14	0.00372	3820.14	0.00123		3910.2	0.00701	3910.2	0.00532		3817.53	0.01024
3908.77	0.00304	3908.77	0.0019		3908.77	0.00263	3908.77	0.00058		3908.77	0.00265	3908.77	0.00117		3908.77	0.0121	3908.77	0.01071		3908.77	0.00271	3908.77	0.00129		3817.29	0.00162	3817.29	0.00114		3908.77	0.00737	3908.77	0.00548		3814.68	0.00939
3907.34	0.00284	3907.34	0.00177		3907.34	0.00278	3907.34	0.00057		3907.34	0.00313	3907.34	0.00163		3907.34	0.01216	3907.34	0.01147		3907.34	0.00237	3907.34	0.00083		3814.43	0.00027	3814.43	0.00102		3907.34	0.00724	3907.34	0.00517		3811.82	0.00844
3905.91	0.00291	3905.91	0.00185		3905.91	0.00314	3905.91	0.00085		3905.91	0.00373	3905.91	0.00228		3905.91	0.01271	3905.91	0.01232		3905.91	0.00244	3905.91	0.00047		3811.57	0.00053	3811.57	0.00099		3905.91	0.00667	3905.91	0.00454		3808.96	0.008
3904.48	0.00332	3904.48	0.00217		3904.48	0.00383	3904.48	0.00154		3904.48	0.00433	3904.48	0.00305		3904.48	0.01351	3904.48	0.01312		3904.48	0.003	3904.48	0.00056		3808.71	0.00195	3808.71	0.00095		3904.48	0.00592	3904.48	0.00399		3806.11	0.00831
3903.05	0.00396	3903.05	0.0026		3903.05	0.00469	3903.05	0.0024		3903.05	0.0047	3903.05	0.00366		3903.05	0.01445	3903.05	0.01363		3903.05	0.00387	3903.05	0.00112		3805.85	0.00364	3805.85	0.0008		3903.05	0.00506	3903.05	0.0037		3803.25	0.00901
3901.62	0.00456	3901.62	0.00294		3901.62	0.0052	3901.62	0.00284		3901.62	0.00466	3901.62	0.00374		3901.62	0.01583	3901.62	0.01383		3901.62	0.00459	3901.62	0.00179		3802.99	0.00449	3802.99	0.00039		3901.62	0.00408	3901.62	0.00344		3800.39	0.00929
3900.19	0.00488	3900.19	0.00304		3900.19	0.00512	3900.19	0.00267		3900.19	0.00432	3900.19	0.00331		3900.19	0.01736	3900.19	0.01363		3900.19	0.00484	3900.19	0.00219		3800.13	0.00425	3800.13	-0.0001		3900.19	0.00326	3900.19	0.00309		3797.53	0.00858
3898.76	0.00482	3898.76	0.00288		3898.76	0.00467	3898.76	0.00225		3898.76	0.00391	3898.76	0.00266		3898.76	0.01808	3898.76	0.01281		3898.76	0.0046	3898.76	0.00239		3797.27	0.00403	3797.27	-0.00016		3898.76	0.00303	3898.76	0.00296		3794.68	0.00726
3897.33	0.00447	3897.33	0.0026		3897.33	0.00414	3897.33	0.0019		3897.33	0.00353	3897.33	0.0021		3897.33	0.01766	3897.33	0.01153		3897.33	0.00411	3897.33	0.00248		3794.41	0.00449	3794.41	0.00028		3897.33	0.00333	3897.33	0.00315		3791.82	0.00606
3895.9	0.00403	3895.9	0.00236		3895.9	0.00376	3895.9	0.0017		3895.9	0.00332	3895.9	0.00183		3895.9	0.01692	3895.9	0.01039		3895.9	0.00362	3895.9	0.00241		3791.55	0.00509	3791.55	0.00084		3895.9	0.0037	3895.9	0.00338		3788.96	0.00538
3894.47	0.0037	3894.47	0.00223		3894.47	0.00358	3894.47	0.00156		3894.47	0.0033	3894.47	0.00187		3894.47	0.01667	3894.47	0.00984		3894.47	0.00327	3894.47	0.00211		3788.69	0.00507	3788.69	0.00111		3894.47	0.00406	3894.47	0.00347		3786.1	0.00523
3893.04	0.00348	3893.04	0.00221		3893.04	0.0037	3893.04	0.00146		3893.04	0.00346	3893.04	0.00215		3893.04	0.01669	3893.04	0.00981		3893.04	0.00306	3893.04	0.00179		3785.83	0.00418	3785.83	0.00096		3893.04	0.00465	3893.04	0.00361		3783.25	0.00536
3891.61	0.00332	3891.61	0.00223		3891.61	0.00411	3891.61	0.00143		3891.61	0.00368	3891.61	0.00254		3891.61	0.01606	3891.61	0.00989		3891.61	0.0029	3891.61	0.00172		3782.97	0.00312	3782.97	0.0006		3891.61	0.00565	3891.61	0.00416		3780.39	0.00546
3890.18	0.0032	3890.18	0.00229		3890.18	0.00464	3890.18	0.00144		3890.18	0.00394	3890.18	0.00294		3890.18	0.01467	3890.18	0.00998		3890.18	0.00267	3890.18	0.00193		3780.11	0.00294	3780.11	0.00048		3890.18	0.00663	3890.18	0.00494		3777.53	0.00544
3888.75	0.0032	3888.75	0.00241		3888.75	0.00496	3888.75	0.00137		3888.75	0.00422	3888.75	0.0033		3888.75	0.01377	3888.75	0.0104		3888.75	0.00233	3888.75	0.00197		3777.25	0.00381	3777.25	0.00079		3888.75	0.00675	3888.75	0.00516		3774.68	0.00551
3887.32	0.00336	3887.32	0.00258		3887.32	0.00491	3887.32	0.00117		3887.32	0.00442	3887.32	0.00353		3887.32	0.01393	3887.32	0.01127		3887.32	0.00206	3887.32	0.00158		3774.39	0.00505	3774.39	0.00144		3887.32	0.00565	3887.32	0.00434		3771.82	0.00574
3885.89	0.00353	3885.89	0.00264		3885.89	0.00452	3885.89	0.0009		3885.89	0.00428	3885.89	0.00342		3885.89	0.01406	3885.89	0.01197		3885.89	0.00202	3885.89	0.00099		3771.54	0.00573	3771.54	0.00166		3885.89	0.00384	3885.89	0.00292		3768.96	0.00605
3884.46	0.00365	3884.46	0.00255		3884.46	0.00409	3884.46	0.00084		3884.46	0.00391	3884.46	0.00305		3884.46	0.01347	3884.46	0.01218		3884.46	0.00236	3884.46	0.00068		3768.68	0.00537	3768.68	0.00116		3884.46	0.00231	3884.46	0.00189		3766.1	0.00644
3883.03	0.00391	3883.03	0.0026		3883.03	0.004	3883.03	0.00123		3883.03	0.00377	3883.03	0.00284		3883.03	0.01355	3883.03	0.01258		3883.03	0.00321	3883.03	0.00087		3765.82	0.00424	3765.82	0.00036		3883.03	0.00178	3883.03	0.00179		3763.25	0.007
3881.6	0.00434	3881.6	0.00288		3881.6	0.00427	3881.6	0.00195		3881.6	0.00394	3881.6	0.00287		3881.6	0.01522	3881.6	0.01354		3881.6	0.00439	3881.6	0.00146		3762.96	0.00313	3762.96	-0.0001		3881.6	0.00225	3881.6	0.00247		3760.39	0.00767
3880.17	0.00454	3880.17	0.00302		3880.17	0.00458	3880.17	0.00254		3880.17	0.00395	3880.17	0.00271		3880.17	0.01699	3880.17	0.01415		3880.17	0.00528	3880.17	0.00221		3760.1	0.00246	3760.1	0.00018		3880.17	0.00336	3880.17	0.00353		3757.53	0.0083
3878.74	0.00427	3878.74	0.0028		3878.74	0.00468	3878.74	0.00267		3878.74	0.00358	3878.74	0.00222		3878.74	0.01752	3878.74	0.01372		3878.74	0.00538	3878.74	0.00278		3757.24	0.00203	3757.24	0.00105		3878.74	0.00456	3878.74	0.00452		3754.68	0.00879
3877.32	0.00383	3877.32	0.00249		3877.32	0.00466	3877.32	0.00244		3877.32	0.0032	3877.32	0.00184		3877.32	0.01761	3877.32	0.01294		3877.32	0.00488	3877.32	0.00291		3754.38	0.0017	3754.38	0.0018		3877.32	0.00534	3877.32	0.00507		3751.82	0.00906
3875.89	0.0035	3875.89	0.00238		3875.89	0.00468	3875.89	0.00214		3875.89	0.00315	3875.89	0.00188		3875.89	0.0181	3875.89	0.01237		3875.89	0.00424	3875.89	0.00269		3751.52	0.0019	3751.52	0.00188		3875.89	0.00567	3875.89	0.00523		3748.96	0.00883
3874.46	0.00321	3874.46	0.00237		3874.46	0.00484	3874.46	0.00199		3874.46	0.00337	3874.46	0.00222		3874.46	0.01833	3874.46	0.01164		3874.46	0.00368	3874.46	0.00238		3748.66	0.00333	3748.66	0.00161		3874.46	0.00577	3874.46	0.00539		3746.1	0.00833
3873.03	0.00297	3873.03	0.0024		3873.03	0.00518	3873.03	0.00208		3873.03	0.00385	3873.03	0.00276		3873.03	0.01795	3873.03	0.01066		3873.03	0.00336	3873.03	0.00221		3745.8	0.00519	3745.8	0.00151		3873.03	0.00572	3873.03	0.00571		3743.25	0.00824
3871.6	0.00304	3871.6	0.00259		3871.6	0.00561	3871.6	0.00238		3871.6	0.0046	3871.6	0.0035		3871.6	0.01774	3871.6	0.01013		3871.6	0.00351	3871.6	0.00221		3742.94	0.00568	3742.94	0.00163		3871.6	0.00541	3871.6	0.00597		3740.39	0.00867
3870.17	0.00344	3870.17	0.00286		3870.17	0.00583	3870.17	0.00264		3870.17	0.00527	3870.17	0.00417		3870.17	0.01751	3870.17	0.01011		3870.17	0.00399	3870.17	0.00238		3740.08	0.00432	3740.08	0.00155		3870.17	0.00485	3870.17	0.00595		3737.53	0.00897
3868.74	0.00379	3868.74	0.00296		3868.74	0.00559	3868.74	0.00262		3868.74	0.00542	3868.74	0.00441		3868.74	0.01634	3868.74	0.01		3868.74	0.00422	3868.74	0.00256		3737.22	0.00193	3737.22	0.001		3868.74	0.00424	3868.74	0.00557		3734.68	0.00858
3867.31	0.00398	3867.31	0.00293		3867.31	0.00494	3867.31	0.00239		3867.31	0.00517	3867.31	0.0043		3867.31	0.01505	3867.31	0.01		3867.31	0.00401	3867.31	0.00246		3734.36	0.0004	3734.36	0.00038		3867.31	0.0036	3867.31	0.00476		3731.82	0.0078
3865.88	0.00413	3865.88	0.00293		3865.88	0.00425	3865.88	0.00226		3865.88	0.00488	3865.88	0.00411		3865.88	0.01487	3865.88	0.01072		3865.88	0.00371	3865.88	0.00215		3731.5	0.00112	3731.5	0.00028		3865.88	0.00301	3865.88	0.00372		3728.96	0.00732
3864.45	0.00422	3864.45	0.00286		3864.45	0.00391	3864.45	0.00247		3864.45	0.00463	3864.45	0.00386		3864.45	0.01536	3864.45	0.01194		3864.45	0.00369	3864.45	0.00203		3728.64	0.00333	3728.64	0.00071		3864.45	0.00286	3864.45	0.00306		3726.1	0.00736
3863.02	0.00411	3863.02	0.00261		3863.02	0.00411	3863.02	0.00289		3863.02	0.00438	3863.02	0.00347		3863.02	0.01556	3863.02	0.01297		3863.02	0.00397	3863.02	0.00235		3725.78	0.00515	3725.78	0.00132		3863.02	0.00337	3863.02	0.00321		3723.25	0.0075
3861.59	0.00385	3861.59	0.00229		3861.59	0.00464	3861.59	0.0032		3861.59	0.00421	3861.59	0.00311		3861.59	0.01548	3861.59	0.01348		3861.59	0.00423	3861.59	0.00285		3722.93	0.00557	3722.93	0.00171		3861.59	0.00425	3861.59	0.00388		3720.39	0.00728
3860.16	0.00361	3860.16	0.00208		3860.16	0.0052	3860.16	0.0033		3860.16	0.00431	3860.16	0.00301		3860.16	0.01547	3860.16	0.01356		3860.16	0.00417	3860.16	0.00317		3720.07	0.00468	3720.07	0.00157		3860.16	0.00515	3860.16	0.00458		3717.53	0.00681
3858.73	0.00349	3858.73	0.00205		3858.73	0.00578	3858.73	0.00343		3858.73	0.00485	3858.73	0.0034		3858.73	0.01572	3858.73	0.01343		3858.73	0.00384	3858.73	0.00329		3717.21	0.00346	3717.21	0.00091		3858.73	0.00602	3858.73	0.0052		3714.67	0.00654
3857.3	0.00362	3857.3	0.00231		3857.3	0.00652	3857.3	0.00381		3857.3	0.00589	3857.3	0.00438		3857.3	0.01664	3857.3	0.01349		3857.3	0.00372	3857.3	0.00349		3714.35	0.0029	3714.35	0.00023		3857.3	0.00706	3857.3	0.00597		3711.82	0.00663
3855.87	0.00412	3855.87	0.00294		3855.87	0.00732	3855.87	0.00433		3855.87	0.00717	3855.87	0.0057		3855.87	0.01863	3855.87	0.01405		3855.87	0.00439	3855.87	0.00414		3711.49	0.00343	3711.49	0.00029		3855.87	0.00849	3855.87	0.00708		3708.96	0.0067
3854.44	0.00481	3854.44	0.00374		3854.44	0.00779	3854.44	0.00464		3854.44	0.00796	3854.44	0.0067		3854.44	0.02081	3854.44	0.01458		3854.44	0.00595	3854.44	0.00525		3708.63	0.00453	3708.63	0.00114		3854.44	0.0101	3854.44	0.0084		3706.1	0.00654
3853.01	0.00514	3853.01	0.0041		3853.01	0.00759	3853.01	0.00453		3853.01	0.00762	3853.01	0.00665		3853.01	0.02114	3853.01	0.0138		3853.01	0.00737	3853.01	0.00619		3705.77	0.0052	3705.77	0.00173		3853.01	0.01096	3853.01	0.00929		3703.25	0.00637
3851.58	0.00478	3851.58	0.00373		3851.58	0.00665	3851.58	0.0039		3851.58	0.00636	3851.58	0.00555		3851.58	0.01936	3851.58	0.01171		3851.58	0.00736	3851.58	0.00604		3702.91	0.00529	3702.91	0.00158		3851.58	0.00995	3851.58	0.00886		3700.39	0.00638
3850.15	0.00422	3850.15	0.00314		3850.15	0.0055	3850.15	0.0031		3850.15	0.00525	3850.15	0.00435		3850.15	0.01783	3850.15	0.01024		3850.15	0.00622	3850.15	0.00491		3700.05	0.0052	3700.05	0.00117		3850.15	0.00748	3850.15	0.00724		3697.53	0.00649
3848.72	0.0039	3848.72	0.00279		3848.72	0.00472	3848.72	0.00256		3848.72	0.00482	3848.72	0.00369		3848.72	0.01779	3848.72	0.01016		3848.72	0.00499	3848.72	0.00365		3697.19	0.00527	3697.19	0.00092		3848.72	0.00495	3848.72	0.0054		3694.67	0.0067
3847.29	0.00376	3847.29	0.00262		3847.29	0.00429	3847.29	0.00227		3847.29	0.0047	3847.29	0.00336		3847.29	0.01859	3847.29	0.01084		3847.29	0.00411	3847.29	0.00264		3694.33	0.00548	3694.33	0.0009		3847.29	0.00308	3847.29	0.00384		3691.82	0.00698
3845.86	0.00359	3845.86	0.00242		3845.86	0.00399	3845.86	0.00209		3845.86	0.00446	3845.86	0.003		3845.86	0.01921	3845.86	0.01158		3845.86	0.00357	3845.86	0.00191		3691.47	0.00543	3691.47	0.00107		3845.86	0.00204	3845.86	0.00267		3688.96	0.00704
3844.43	0.00324	3844.43	0.00208		3844.43	0.00388	3844.43	0.00206		3844.43	0.00407	3844.43	0.00255		3844.43	0.01901	3844.43	0.01201		3844.43	0.00331	3844.43	0.00152		3688.61	0.00478	3688.61	0.00143		3844.43	0.00188	3844.43	0.00216		3686.1	0.00671
3843	0.00277	3843	0.00167		3843	0.00415	3843	0.00229		3843	0.00378	3843	0.00223		3843	0.01791	3843	0.01208		3843	0.0033	3843	0.0016		3685.75	0.00421	3685.75	0.0018		3843	0.00243	3843	0.00252		3683.25	0.00637
3841.57	0.0024	3841.57	0.00136		3841.57	0.00472	3841.57	0.00266		3841.57	0.00386	3841.57	0.0023		3841.57	0.01669	3841.57	0.01201		3841.57	0.00342	3841.57	0.00203		3682.89	0.00442	3682.89	0.00197		3841.57	0.00323	3841.57	0.00348		3680.39	0.00643
3840.14	0.00223	3840.14	0.0013		3840.14	0.00523	3840.14	0.0029		3840.14	0.00428	3840.14	0.00283		3840.14	0.01605	3840.14	0.012		3840.14	0.00347	3840.14	0.0025		3680.03	0.00522	3680.03	0.00216		3840.14	0.00382	3840.14	0.00435		3677.53	0.007
3838.71	0.00208	3838.71	0.00133		3838.71	0.00535	3838.71	0.00288		3838.71	0.0047	3838.71	0.00353		3838.71	0.0156	3838.71	0.01179		3838.71	0.00316	3838.71	0.00262		3677.18	0.00628	3677.18	0.00262		3838.71	0.0041	3838.71	0.0047		3674.67	0.00776
3837.28	0.00183	3837.28	0.00137		3837.28	0.00493	3837.28	0.00256		3837.28	0.00481	3837.28	0.00397		3837.28	0.01483	3837.28	0.01112		3837.28	0.0026	3837.28	0.00241		3674.32	0.00733	3674.32	0.00342		3837.28	0.00414	3837.28	0.00453		3671.82	0.00806
3835.85	0.00166	3835.85	0.0015		3835.85	0.00422	3835.85	0.00211		3835.85	0.00463	3835.85	0.00401		3835.85	0.01419	3835.85	0.01042		3835.85	0.00215	3835.85	0.00209		3671.46	0.00804	3671.46	0.00398		3835.85	0.00401	3835.85	0.00413		3668.96	0.00764
3834.42	0.00189	3834.42	0.00188		3834.42	0.00369	3834.42	0.00186		3834.42	0.00456	3834.42	0.00392		3834.42	0.01454	3834.42	0.01029		3834.42	0.00224	3834.42	0.00201		3668.6	0.00838	3668.6	0.00416		3834.42	0.00391	3834.42	0.00388		3666.1	0.00696
3832.99	0.00249	3832.99	0.00242		3832.99	0.00355	3832.99	0.00192		3832.99	0.00474	3832.99	0.00389		3832.99	0.01573	3832.99	0.01065		3832.99	0.00282	3832.99	0.00227		3665.74	0.00876	3665.74	0.00448		3832.99	0.00392	3832.99	0.00383		3663.25	0.00654
3831.57	0.00316	3831.57	0.00283		3831.57	0.00364	3831.57	0.00211		3831.57	0.00498	3831.57	0.0038		3831.57	0.01677	3831.57	0.01085		3831.57	0.00343	3831.57	0.00258		3662.88	0.00946	3662.88	0.00495		3831.57	0.00383	3831.57	0.00378		3660.39	0.00648
3830.14	0.00366	3830.14	0.00298		3830.14	0.00378	3830.14	0.00226		3830.14	0.00511	3830.14	0.00356		3830.14	0.01725	3830.14	0.01073		3830.14	0.00367	3830.14	0.00267		3660.02	0.01031	3660.02	0.00544		3830.14	0.00349	3830.14	0.00359		3657.53	0.00675
3828.71	0.00399	3828.71	0.00291		3828.71	0.004	3828.71	0.00238		3828.71	0.00513	3828.71	0.00327		3828.71	0.01755	3828.71	0.01062		3828.71	0.00354	3828.71	0.00251		3657.16	0.0108	3657.16	0.00586		3828.71	0.0031	3828.71	0.00331		3654.67	0.00745
3827.28	0.00403	3827.28	0.00265		3827.28	0.00436	3827.28	0.00252		3827.28	0.005	3827.28	0.00299		3827.28	0.01765	3827.28	0.01059		3827.28	0.00325	3827.28	0.00232		3654.3	0.01082	3654.3	0.00613		3827.28	0.00313	3827.28	0.00323		3651.82	0.00871
3825.85	0.00365	3825.85	0.0022		3825.85	0.00486	3825.85	0.00269		3825.85	0.00471	3825.85	0.00282		3825.85	0.01712	3825.85	0.01043		3825.85	0.00298	3825.85	0.00229		3651.44	0.01132	3651.44	0.00631		3825.85	0.00382	3825.85	0.00359		3648.96	0.00991
3824.42	0.00303	3824.42	0.00176		3824.42	0.00529	3824.42	0.00284		3824.42	0.00444	3824.42	0.00296		3824.42	0.01657	3824.42	0.0104		3824.42	0.00288	3824.42	0.00235		3648.58	0.01343	3648.58	0.00688		3824.42	0.00486	3824.42	0.00414		3646.1	0.01011
3822.99	0.00249	3822.99	0.0016		3822.99	0.00536	3822.99	0.00291		3822.99	0.00432	3822.99	0.00342		3822.99	0.01682	3822.99	0.01087		3822.99	0.003	3822.99	0.00231		3645.72	0.01574	3645.72	0.00807		3822.99	0.00579	3822.99	0.00452		3643.24	0.0095
3821.56	0.00206	3821.56	0.00159		3821.56	0.00497	3821.56	0.00293		3821.56	0.00423	3821.56	0.00387		3821.56	0.01694	3821.56	0.01133		3821.56	0.00304	3821.56	0.00224		3642.86	0.01637	3642.86	0.00925		3821.56	0.00659	3821.56	0.00487		3640.39	0.0089
3820.13	0.00164	3820.13	0.00155		3820.13	0.00446	3820.13	0.003		3820.13	0.00414	3820.13	0.00403		3820.13	0.0159	3820.13	0.01117		3820.13	0.00277	3820.13	0.00226		3640	0.01561	3640	0.01		3820.13	0.00725	3820.13	0.00545		3637.53	0.00875
3818.7	0.0016	3818.7	0.00174		3818.7	0.00418	3818.7	0.003		3818.7	0.00423	3818.7	0.00404		3818.7	0.01548	3818.7	0.01118		3818.7	0.00259	3818.7	0.00225		3637.14	0.01435	3637.14	0.01022		3818.7	0.00732	3818.7	0.00585		3634.67	0.00924
3817.27	0.00223	3817.27	0.00241		3817.27	0.00425	3817.27	0.00289		3817.27	0.00461	3817.27	0.00417		3817.27	0.01729	3817.27	0.01225		3817.27	0.00302	3817.27	0.00219		3634.28	0.01325	3634.28	0.00996		3817.27	0.00667	3817.27	0.00569		3631.82	0.01057
3815.84	0.00314	3815.84	0.0032		3815.84	0.00448	3815.84	0.00272		3815.84	0.00496	3815.84	0.00425		3815.84	0.01969	3815.84	0.01359		3815.84	0.00391	3815.84	0.00228		3631.43	0.01294	3631.43	0.00952		3815.84	0.00581	3815.84	0.00525		3628.96	0.01249
3814.41	0.0038	3814.41	0.00363		3814.41	0.00465	3814.41	0.00258		3814.41	0.00502	3814.41	0.00408		3814.41	0.02057	3814.41	0.01405		3814.41	0.00462	3814.41	0.00253		3628.57	0.01371	3628.57	0.00933		3814.41	0.00517	3814.41	0.00492		3626.1	0.01426
3812.98	0.00413	3812.98	0.00369		3812.98	0.00479	3812.98	0.00258		3812.98	0.00499	3812.98	0.00386		3812.98	0.0203	3812.98	0.01384		3812.98	0.00487	3812.98	0.00271		3625.71	0.01461	3625.71	0.00954		3812.98	0.00472	3812.98	0.00463		3623.24	0.0154
3811.55	0.00428	3811.55	0.00359		3811.55	0.00501	3811.55	0.00271		3811.55	0.0051	3811.55	0.00383		3811.55	0.02015	3811.55	0.01367		3811.55	0.00477	3811.55	0.00266		3622.85	0.01444	3622.85	0.00973		3811.55	0.00428	3811.55	0.00422		3620.39	0.01605
3810.12	0.00431	3810.12	0.00338		3810.12	0.00522	3810.12	0.00279		3810.12	0.00525	3810.12	0.00389		3810.12	0.0205	3810.12	0.01377		3810.12	0.00454	3810.12	0.00245		3619.99	0.0134	3619.99	0.00963		3810.12	0.00377	3810.12	0.00367		3617.53	0.01637
3808.69	0.00419	3808.69	0.00306		3808.69	0.00536	3808.69	0.00277		3808.69	0.00525	3808.69	0.00391		3808.69	0.02083	3808.69	0.01385		3808.69	0.00428	3808.69	0.00231		3617.13	0.01271	3617.13	0.00929		3808.69	0.00336	3808.69	0.00328		3614.67	0.01646
3807.26	0.00383	3807.26	0.00259		3807.26	0.00549	3807.26	0.00278		3807.26	0.00506	3807.26	0.00384		3807.26	0.02003	3807.26	0.01332		3807.26	0.00394	3807.26	0.0025		3614.27	0.01314	3614.27	0.00879		3807.26	0.00345	3807.26	0.00351		3611.82	0.01644
3805.83	0.00329	3805.83	0.00205		3805.83	0.00566	3805.83	0.00291		3805.83	0.00482	3805.83	0.00377		3805.83	0.01792	3805.83	0.01208		3805.83	0.00337	3805.83	0.00292		3611.41	0.014	3611.41	0.00852		3805.83	0.00411	3805.83	0.00443		3608.96	0.0164
3804.4	0.00295	3804.4	0.00181		3804.4	0.00576	3804.4	0.00306		3804.4	0.00477	3804.4	0.00379		3804.4	0.01637	3804.4	0.01116		3804.4	0.00276	3804.4	0.00315		3608.55	0.0138	3608.55	0.00876		3804.4	0.00477	3804.4	0.00535		3606.1	0.01636
3802.97	0.00298	3802.97	0.00207		3802.97	0.0056	3802.97	0.00302		3802.97	0.00485	3802.97	0.00383		3802.97	0.01663	3802.97	0.01131		3802.97	0.00258	3802.97	0.00306		3605.69	0.01212	3605.69	0.00926		3802.97	0.00504	3802.97	0.00572		3603.24	0.01638
3801.54	0.00301	3801.54	0.00248		3801.54	0.00518	3801.54	0.00275		3801.54	0.00473	3801.54	0.00366		3801.54	0.01721	3801.54	0.0117		3801.54	0.00288	3801.54	0.003		3602.83	0.01	3602.83	0.00931		3801.54	0.00517	3801.54	0.00581		3600.39	0.0165
3800.11	0.00279	3800.11	0.00269		3800.11	0.00475	3800.11	0.00242		3800.11	0.00446	3800.11	0.00334		3800.11	0.01673	3800.11	0.01148		3800.11	0.00327	3800.11	0.00308		3599.97	0.0089	3599.97	0.00847		3800.11	0.00532	3800.11	0.00583		3597.53	0.01669
3798.68	0.00274	3798.68	0.00286		3798.68	0.00462	3798.68	0.00224		3798.68	0.00447	3798.68	0.00329		3798.68	0.01671	3798.68	0.01147		3798.68	0.00351	3798.68	0.00301		3597.11	0.00937	3597.11	0.00699		3798.68	0.0052	3798.68	0.00548		3594.67	0.01696
3797.25	0.00314	3797.25	0.00316		3797.25	0.00489	3797.25	0.00233		3797.25	0.00486	3797.25	0.00357		3797.25	0.01836	3797.25	0.01241		3797.25	0.00371	3797.25	0.00276		3594.25	0.01044	3594.25	0.0057		3797.25	0.00481	3797.25	0.00479		3591.82	0.0174
3795.82	0.0037	3795.82	0.0034		3795.82	0.00529	3795.82	0.00257		3795.82	0.00516	3795.82	0.00383		3795.82	0.02053	3795.82	0.01371		3795.82	0.00394	3795.82	0.00261		3591.39	0.01045	3591.39	0.0052		3795.82	0.00443	3795.82	0.00417		3588.96	0.01783
3794.39	0.00402	3794.39	0.00338		3794.39	0.00547	3794.39	0.00267		3794.39	0.00502	3794.39	0.00378		3794.39	0.022	3794.39	0.01464		3794.39	0.00408	3794.39	0.00261		3588.53	0.00871	3588.53	0.00527		3794.39	0.00404	3794.39	0.0037		3586.1	0.01798
3792.96	0.00409	3792.96	0.00319		3792.96	0.00534	3792.96	0.00256		3792.96	0.0046	3792.96	0.00353		3792.96	0.02286	3792.96	0.0152		3792.96	0.00403	3792.96	0.00265		3585.67	0.00629	3585.67	0.00522		3792.96	0.00354	3792.96	0.0033		3583.24	0.01782
3791.53	0.00401	3791.53	0.00292		3791.53	0.00503	3791.53	0.00233		3791.53	0.00416	3791.53	0.00322		3791.53	0.02329	3791.53	0.01549		3791.53	0.00376	3791.53	0.00265		3582.82	0.00506	3582.82	0.00452		3791.53	0.00313	3791.53	0.0031		3580.39	0.0176
3790.1	0.00387	3790.1	0.00266		3790.1	0.00462	3790.1	0.00206		3790.1	0.00381	3790.1	0.00289		3790.1	0.0231	3790.1	0.01544		3790.1	0.00334	3790.1	0.00269		3579.96	0.00557	3579.96	0.00345		3790.1	0.00319	3790.1	0.00331		3577.53	0.01756
3788.67	0.00373	3788.67	0.00249		3788.67	0.00414	3788.67	0.00177		3788.67	0.00361	3788.67	0.00258		3788.67	0.02231	3788.67	0.01508		3788.67	0.00291	3788.67	0.00278		3577.1	0.00669	3577.1	0.00279		3788.67	0.00387	3788.67	0.00397		3574.67	0.01785
3787.24	0.0037	3787.24	0.00253		3787.24	0.00363	3787.24	0.00146		3787.24	0.00358	3787.24	0.00235		3787.24	0.02129	3787.24	0.01464		3787.24	0.00263	3787.24	0.00285		3574.24	0.0069	3574.24	0.00284		3787.24	0.00497	3787.24	0.00481		3571.82	0.01856
3785.82	0.00375	3785.82	0.00281		3785.82	0.00313	3785.82	0.00104		3785.82	0.00365	3785.82	0.00218		3785.82	0.02019	3785.82	0.01419		3785.82	0.0026	3785.82	0.00291		3571.38	0.00545	3571.38	0.00306		3785.82	0.00609	3785.82	0.0056		3568.96	0.01957
3784.39	0.00379	3784.39	0.00327		3784.39	0.0028	3784.39	0.00067		3784.39	0.00373	3784.39	0.00212		3784.39	0.01892	3784.39	0.01367		3784.39	0.00279	3784.39	0.00294		3568.52	0.00303	3568.52	0.00272		3784.39	0.0069	3784.39	0.00617		3566.1	0.02048
3782.96	0.00373	3782.96	0.00372		3782.96	0.00258	3782.96	0.00039		3782.96	0.00369	3782.96	0.0021		3782.96	0.0178	3782.96	0.01317		3782.96	0.00304	3782.96	0.00274		3565.66	0.00162	3565.66	0.00195		3782.96	0.00693	3782.96	0.00614		3563.24	0.02092
3781.53	0.0036	3781.53	0.00402		3781.53	0.0024	3781.53	0.00025		3781.53	0.00355	3781.53	0.00211		3781.53	0.01742	3781.53	0.01289		3781.53	0.00323	3781.53	0.00215		3562.8	0.00228	3562.8	0.0014		3781.53	0.00593	3781.53	0.00519		3560.39	0.02103
3780.1	0.00351	3780.1	0.00405		3780.1	0.00237	3780.1	0.00039		3780.1	0.00341	3780.1	0.00212		3780.1	0.01768	3780.1	0.01275		3780.1	0.00339	3780.1	0.00145		3559.94	0.00379	3559.94	0.00129		3780.1	0.0044	3780.1	0.00369		3557.53	0.02114
3778.67	0.00351	3778.67	0.00382		3778.67	0.0027	3778.67	0.00092		3778.67	0.00346	3778.67	0.00221		3778.67	0.01793	3778.67	0.01255		3778.67	0.00363	3778.67	0.00124		3557.08	0.00433	3557.08	0.00146		3778.67	0.00327	3778.67	0.00257		3554.67	0.02145
3777.24	0.00368	3777.24	0.0035		3777.24	0.00334	3777.24	0.00165		3777.24	0.00375	3777.24	0.00246		3777.24	0.01822	3777.24	0.01246		3777.24	0.00399	3777.24	0.00173		3554.22	0.00318	3554.22	0.00143		3777.24	0.00293	3777.24	0.00232		3551.81	0.02193
3775.81	0.00395	3775.81	0.00327		3775.81	0.00395	3775.81	0.00223		3775.81	0.00413	3775.81	0.00281		3775.81	0.01894	3775.81	0.01272		3775.81	0.00426	3775.81	0.00248		3551.36	0.00111	3551.36	0.001		3775.81	0.00297	3775.81	0.00261		3548.96	0.02239
3774.38	0.00415	3774.38	0.00306		3774.38	0.00423	3774.38	0.00241		3774.38	0.00435	3774.38	0.003		3774.38	0.01997	3774.38	0.01318		3774.38	0.00416	3774.38	0.003		3548.5	-0.0001	3548.5	0.00039		3774.38	0.00293	3774.38	0.0029		3546.1	0.02264
3772.95	0.00416	3772.95	0.00283		3772.95	0.00409	3772.95	0.00218		3772.95	0.00426	3772.95	0.00292		3772.95	0.02103	3772.95	0.01362		3772.95	0.0037	3772.95	0.00313		3545.64	0.00064	3545.64	0.00011		3772.95	0.00278	3772.95	0.00301		3543.24	0.02274
3771.52	0.00399	3771.52	0.00266		3771.52	0.00364	3771.52	0.00166		3771.52	0.00395	3771.52	0.00261		3771.52	0.02195	3771.52	0.01403		3771.52	0.0032	3771.52	0.00302		3542.78	0.00225	3542.78	0.0004		3771.52	0.00289	3771.52	0.00317		3540.39	0.02286
3770.09	0.00372	3770.09	0.00267		3770.09	0.0031	3770.09	0.00108		3770.09	0.00359	3770.09	0.00227		3770.09	0.02234	3770.09	0.01438		3770.09	0.00292	3770.09	0.00295		3539.92	0.00274	3539.92	0.00078		3770.09	0.00367	3770.09	0.00381		3537.53	0.02302
3768.66	0.00351	3768.66	0.00297		3768.66	0.00266	3768.66	0.00067		3768.66	0.00335	3768.66	0.00208		3768.66	0.0222	3768.66	0.01472		3768.66	0.00297	3768.66	0.00298		3537.07	0.00149	3537.07	0.00074		3768.66	0.00504	3768.66	0.00494		3534.67	0.02324
3767.23	0.00353	3767.23	0.00362		3767.23	0.0025	3767.23	0.00059		3767.23	0.00336	3767.23	0.00219		3767.23	0.02213	3767.23	0.01532		3767.23	0.00334	3767.23	0.00299		3534.21	-0.0004	3534.21	0.00042		3767.23	0.00636	3767.23	0.00599		3531.81	0.02379
3765.8	0.00371	3765.8	0.00441		3765.8	0.00273	3765.8	0.00086		3765.8	0.00363	3765.8	0.00255		3765.8	0.0221	3765.8	0.01603		3765.8	0.00388	3765.8	0.00293		3531.35	-0.00139	3531.35	0.0004		3765.8	0.00715	3765.8	0.00654		3528.96	0.02488
3764.37	0.00381	3764.37	0.00496		3764.37	0.0033	3764.37	0.00141		3764.37	0.00402	3764.37	0.003		3764.37	0.02155	3764.37	0.01641		3764.37	0.00437	3764.37	0.00286		3528.49	-0.00075	3528.49	0.00091		3764.37	0.00735	3764.37	0.00653		3526.1	0.02611
3762.94	0.00379	3762.94	0.0051		3762.94	0.00403	3762.94	0.00208		3762.94	0.00442	3762.94	0.00345		3762.94	0.02072	3762.94	0.01647		3762.94	0.00472	3762.94	0.00278		3525.63	0.00072	3525.63	0.00152		3762.94	0.00693	3762.94	0.00604		3523.24	0.02678
3761.51	0.00379	3761.51	0.00491		3761.51	0.00471	3761.51	0.00274		3761.51	0.00476	3761.51	0.00382		3761.51	0.02026	3761.51	0.01645		3761.51	0.00502	3761.51	0.00269		3522.77	0.00164	3522.77	0.00156		3761.51	0.00594	3761.51	0.00515		3520.39	0.02672
3760.08	0.00386	3760.08	0.00441		3760.08	0.00531	3760.08	0.00341		3760.08	0.00499	3760.08	0.00403		3760.08	0.01981	3760.08	0.01614		3760.08	0.00533	3760.08	0.00278		3519.91	0.00146	3519.91	0.00098		3760.08	0.00476	3760.08	0.00424		3517.53	0.02646
3758.65	0.00395	3758.65	0.0037		3758.65	0.00591	3758.65	0.00408		3758.65	0.00518	3758.65	0.00412		3758.65	0.01857	3758.65	0.01515		3758.65	0.00548	3758.65	0.00323		3517.05	0.00088	3517.05	0.00052		3758.65	0.00405	3758.65	0.00386		3514.67	0.02653
3757.22	0.004	3757.22	0.00301		3757.22	0.00643	3757.22	0.00454		3757.22	0.00544	3757.22	0.00419		3757.22	0.01677	3757.22	0.01374		3757.22	0.00532	3757.22	0.00386		3514.19	0.00084	3514.19	0.00093		3757.22	0.0041	3757.22	0.00422		3511.81	0.02704
3755.79	0.00401	3755.79	0.00257		3755.79	0.00666	3755.79	0.00461		3755.79	0.00574	3755.79	0.0043		3755.79	0.01543	3755.79	0.01261		3755.79	0.00492	3755.79	0.00431		3511.33	0.00167	3511.33	0.00191		3755.79	0.00464	3755.79	0.00501		3508.96	0.02778
3754.36	0.00405	3754.36	0.00245		3754.36	0.00653	3754.36	0.00433		3754.36	0.00596	3754.36	0.0044		3754.36	0.01527	3754.36	0.01218		3754.36	0.00463	3754.36	0.00452		3508.47	0.00282	3508.47	0.00256		3754.36	0.00543	3754.36	0.00592		3506.1	0.0285
3752.93	0.0042	3752.93	0.00267		3752.93	0.00628	3752.93	0.00406		3752.93	0.00603	3752.93	0.00442		3752.93	0.01601	3752.93	0.01229		3752.93	0.00483	3752.93	0.0048		3505.61	0.00321	3505.61	0.0019		3752.93	0.00681	3752.93	0.00707		3503.24	0.02903
3751.5	0.00442	3751.5	0.00322		3751.5	0.00646	3751.5	0.00444		3751.5	0.00612	3751.5	0.00452		3751.5	0.01653	3751.5	0.01233		3751.5	0.0056	3751.5	0.0056		3502.75	0.00252	3502.75	0.00054		3751.5	0.00942	3751.5	0.00883		3500.39	0.02936
3750.07	0.00448	3750.07	0.00399		3750.07	0.00735	3750.07	0.00568		3750.07	0.00643	3750.07	0.00497		3750.07	0.01598	3750.07	0.01182		3750.07	0.00652	3750.07	0.00681		3499.89	0.00155	3499.89	-0.00015		3750.07	0.01279	3750.07	0.01094		3497.53	0.02968
3748.64	0.00437	3748.64	0.00485		3748.64	0.00833	3748.64	0.00704		3748.64	0.00698	3748.64	0.00588		3748.64	0.01538	3748.64	0.01139		3748.64	0.00716	3748.64	0.00775		3497.03	0.00142	3497.03	0.0005		3748.64	0.01501	3748.64	0.01216		3494.67	0.03028
3747.21	0.00455	3747.21	0.00586		3747.21	0.00912	3747.21	0.00814		3747.21	0.00807	3747.21	0.00738		3747.21	0.01689	3747.21	0.01254		3747.21	0.00785	3747.21	0.00821		3494.17	0.00233	3494.17	0.00182		3747.21	0.01512	3747.21	0.01208		3491.81	0.03128
3745.78	0.00522	3745.78	0.00684		3745.78	0.00971	3745.78	0.00894		3745.78	0.00958	3745.78	0.00904		3745.78	0.02046	3745.78	0.01535		3745.78	0.0088	3745.78	0.00847		3491.31	0.00332	3491.31	0.00253		3745.78	0.01363	3745.78	0.01118		3488.96	0.03247
3744.35	0.00572	3744.35	0.007		3744.35	0.00961	3744.35	0.00889		3744.35	0.01032	3744.35	0.00956		3744.35	0.02291	3744.35	0.01767		3744.35	0.00919	3744.35	0.00833		3488.46	0.00333	3488.46	0.00197		3744.35	0.0112	3744.35	0.00974		3486.1	0.03352
3742.92	0.00536	3742.92	0.00591		3742.92	0.00839	3742.92	0.00752		3742.92	0.00947	3742.92	0.00828		3742.92	0.02197	3742.92	0.01769		3742.92	0.00801	3742.92	0.00727		3485.6	0.00236	3485.6	0.00078		3742.92	0.00834	3742.92	0.00773		3483.24	0.03425
3741.49	0.00439	3741.49	0.00426		3741.49	0.0066	3741.49	0.00546		3741.49	0.00777	3741.49	0.00623		3741.49	0.01924	3741.49	0.01624		3741.49	0.00562	3741.49	0.00536		3482.74	0.00156	3482.74	0.00015		3741.49	0.00553	3741.49	0.00542		3480.38	0.0347
3740.06	0.00341	3740.06	0.00283		3740.06	0.00502	3740.06	0.00358		3740.06	0.00628	3740.06	0.00457		3740.06	0.01705	3740.06	0.01484		3740.06	0.00309	3740.06	0.00321		3479.88	0.00177	3479.88	0.00067		3740.06	0.00309	3740.06	0.00328		3477.53	0.03504
3738.64	0.00273	3738.64	0.0019		3738.64	0.00381	3738.64	0.00215		3738.64	0.00528	3738.64	0.00346		3738.64	0.01588	3738.64	0.01389		3738.64	0.00119	3738.64	0.00144		3477.02	0.00254	3477.02	0.00168		3738.64	0.00134	3738.64	0.0017		3474.67	0.03544
3737.21	0.00245	3737.21	0.00153		3737.21	0.00299	3737.21	0.0013		3737.21	0.00466	3737.21	0.0027		3737.21	0.01523	3737.21	0.01311		3737.21	0.00044	3737.21	0.00053		3474.16	0.00291	3474.16	0.00211		3737.21	0.0008	3737.21	0.00113		3471.81	0.03599
3735.78	0.00259	3735.78	0.00189		3735.78	0.00287	3735.78	0.00133		3735.78	0.00447	3735.78	0.00234		3735.78	0.01458	3735.78	0.01222		3735.78	0.00098	3735.78	0.00081		3471.3	0.00252	3471.3	0.00161		3735.78	0.00207	3735.78	0.00202		3468.96	0.03687
3734.35	0.00307	3734.35	0.00293		3734.35	0.00358	3734.35	0.00224		3734.35	0.00474	3734.35	0.00248		3734.35	0.01406	3734.35	0.01134		3734.35	0.00262	3734.35	0.00216		3468.44	0.00186	3468.44	0.00076		3734.35	0.00477	3734.35	0.00429		3466.1	0.03817
3732.92	0.00364	3732.92	0.0043		3732.92	0.00462	3732.92	0.00338		3732.92	0.00518	3732.92	0.00297		3732.92	0.01416	3732.92	0.01074		3732.92	0.00433	3732.92	0.00371		3465.58	0.00171	3465.58	0.00041		3732.92	0.00747	3732.92	0.00658		3463.24	0.03971
3731.49	0.0041	3731.49	0.00551		3731.49	0.00547	3731.49	0.00422		3731.49	0.00553	3731.49	0.00366		3731.49	0.01481	3731.49	0.0105		3731.49	0.00546	3731.49	0.00487		3462.72	0.00229	3462.72	0.0009		3731.49	0.00914	3731.49	0.00791		3460.38	0.04123
3730.06	0.00435	3730.06	0.00631		3730.06	0.00594	3730.06	0.00471		3730.06	0.00575	3730.06	0.00448		3730.06	0.01567	3730.06	0.01056		3730.06	0.00604	3730.06	0.00555		3459.86	0.00343	3459.86	0.00196		3730.06	0.00962	3730.06	0.00823		3457.53	0.04268
3728.63	0.00444	3728.63	0.00669		3728.63	0.00604	3728.63	0.00498		3728.63	0.00593	3728.63	0.00532		3728.63	0.01686	3728.63	0.01103		3728.63	0.00645	3728.63	0.00588		3457	0.00432	3457	0.00288		3728.63	0.00911	3728.63	0.00782		3454.67	0.04417
3727.2	0.00442	3727.2	0.00661		3727.2	0.00581	3727.2	0.00502		3727.2	0.00605	3727.2	0.0059		3727.2	0.01824	3727.2	0.01183		3727.2	0.00684	3727.2	0.00603		3454.14	0.00429	3454.14	0.00309		3727.2	0.00792	3727.2	0.00701		3451.81	0.04577
3725.77	0.00426	3725.77	0.00599		3725.77	0.00535	3725.77	0.00479		3725.77	0.00604	3725.77	0.00592		3725.77	0.01926	3725.77	0.01269		3725.77	0.00707	3725.77	0.00612		3451.28	0.00338	3451.28	0.00242		3725.77	0.00657	3725.77	0.00617		3448.96	0.04753
3724.34	0.00405	3724.34	0.00497		3724.34	0.00483	3724.34	0.00426		3724.34	0.00594	3724.34	0.00534		3724.34	0.0199	3724.34	0.01361		3724.34	0.00696	3724.34	0.00614		3448.42	0.00255	3448.42	0.00142		3724.34	0.00553	3724.34	0.00561		3446.1	0.04956
3722.91	0.00387	3722.91	0.00396		3722.91	0.00432	3722.91	0.0035		3722.91	0.0058	3722.91	0.00438		3722.91	0.02057	3722.91	0.01483		3722.91	0.00648	3722.91	0.00601		3445.56	0.00241	3445.56	0.00092		3722.91	0.00497	3722.91	0.00546		3443.24	0.05182
3721.48	0.00377	3721.48	0.00327		3721.48	0.00382	3721.48	0.00266		3721.48	0.00558	3721.48	0.00332		3721.48	0.02129	3721.48	0.01627		3721.48	0.0057	3721.48	0.0057		3442.71	0.00251	3442.71	0.00138		3721.48	0.00492	3721.48	0.0058		3440.38	0.05407
3720.05	0.00376	3720.05	0.00302		3720.05	0.00333	3720.05	0.00196		3720.05	0.00533	3720.05	0.00244		3720.05	0.02179	3720.05	0.01757		3720.05	0.0047	3720.05	0.00524		3439.85	0.00197	3439.85	0.00233		3720.05	0.0054	3720.05	0.00655		3437.53	0.05618
3718.62	0.00378	3718.62	0.00315		3718.62	0.00288	3718.62	0.00153		3718.62	0.00516	3718.62	0.00197		3718.62	0.0218	3718.62	0.01837		3718.62	0.00366	3718.62	0.0047		3436.99	0.00069	3436.99	0.00278		3718.62	0.00635	3718.62	0.00751		3434.67	0.05839
3717.19	0.00375	3717.19	0.00348		3717.19	0.00252	3717.19	0.00141		3717.19	0.00518	3717.19	0.002		3717.19	0.02126	3717.19	0.01852		3717.19	0.00278	3717.19	0.00416		3434.13	-0.0005	3434.13	0.00214		3717.19	0.00753	3717.19	0.00839		3431.81	0.06116
3715.76	0.00364	3715.76	0.0039		3715.76	0.00238	3715.76	0.00159		3715.76	0.00533	3715.76	0.00248		3715.76	0.02055	3715.76	0.01822		3715.76	0.0023	3715.76	0.00372		3431.27	-0.0007	3431.27	0.00089		3715.76	0.00856	3715.76	0.00887		3428.96	0.06489
3714.33	0.00363	3714.33	0.00442		3714.33	0.00257	3714.33	0.00197		3714.33	0.00548	3714.33	0.00321		3714.33	0.02016	3714.33	0.01773		3714.33	0.00246	3714.33	0.00351		3428.41	0.0003	3428.41	0.00021		3714.33	0.00912	3714.33	0.0087		3426.1	0.06957
3712.9	0.00388	3712.9	0.00507		3712.9	0.00316	3712.9	0.00255		3712.9	0.00552	3712.9	0.00398		3712.9	0.01993	3712.9	0.01695		3712.9	0.0034	3712.9	0.00378		3425.55	0.00183	3425.55	0.00089		3712.9	0.0092	3712.9	0.00799		3423.24	0.07494
3711.47	0.00433	3711.47	0.0057		3711.47	0.00416	3711.47	0.00332		3711.47	0.00558	3711.47	0.00467		3711.47	0.0192	3711.47	0.01559		3711.47	0.00496	3711.47	0.00468		3422.69	0.00298	3422.69	0.00247		3711.47	0.00901	3711.47	0.00723		3420.38	0.08065
3710.04	0.00467	3710.04	0.00599		3710.04	0.00512	3710.04	0.00398		3710.04	0.00575	3710.04	0.00507		3710.04	0.01786	3710.04	0.01381		3710.04	0.00632	3710.04	0.00573		3419.83	0.0033	3419.83	0.00346		3710.04	0.0085	3710.04	0.0068		3417.53	0.08649
3708.61	0.00466	3708.61	0.00576		3708.61	0.00537	3708.61	0.00402		3708.61	0.00589	3708.61	0.005		3708.61	0.01671	3708.61	0.01228		3708.61	0.0066	3708.61	0.00612		3416.97	0.00312	3416.97	0.00284		3708.61	0.00745	3708.61	0.00647		3414.67	0.09239
3707.18	0.00441	3707.18	0.00515		3707.18	0.00495	3707.18	0.00354		3707.18	0.00596	3707.18	0.00462		3707.18	0.01644	3707.18	0.01153		3707.18	0.00584	3707.18	0.00567		3414.11	0.00321	3414.11	0.00117		3707.18	0.00609	3707.18	0.0061		3411.81	0.09841
3705.75	0.00411	3705.75	0.00446		3705.75	0.00428	3705.75	0.00296		3705.75	0.00604	3705.75	0.00416		3705.75	0.01711	3705.75	0.01163		3705.75	0.00467	3705.75	0.00479		3411.25	0.00385	3411.25	0.0001		3705.75	0.00488	3705.75	0.00581		3408.95	0.10463
3704.32	0.00386	3704.32	0.00387		3704.32	0.0036	3704.32	0.00248		3704.32	0.00611	3704.32	0.00367		3704.32	0.01848	3704.32	0.01243		3704.32	0.00367	3704.32	0.00398		3408.39	0.00437	3408.39	0.00062		3704.32	0.0042	3704.32	0.00579		3406.1	0.11115
3702.89	0.00369	3702.89	0.00346		3702.89	0.00305	3702.89	0.00216		3702.89	0.00607	3702.89	0.00309		3702.89	0.01995	3702.89	0.01368		3702.89	0.0031	3702.89	0.00351		3405.53	0.00402	3405.53	0.00217		3702.89	0.00436	3702.89	0.00622		3403.24	0.11809
3701.46	0.00359	3701.46	0.00327		3701.46	0.00279	3701.46	0.00209		3701.46	0.00588	3701.46	0.00249		3701.46	0.02075	3701.46	0.01493		3701.46	0.00293	3701.46	0.0035		3402.67	0.00276	3402.67	0.00314		3701.46	0.00547	3701.46	0.00713		3400.38	0.12551
3700.03	0.00358	3700.03	0.00338		3700.03	0.0029	3700.03	0.00228		3700.03	0.00564	3700.03	0.00218		3700.03	0.02076	3700.03	0.01593		3700.03	0.00297	3700.03	0.00374		3399.81	0.00142	3399.81	0.0026		3700.03	0.00704	3700.03	0.00806		3397.53	0.13324
3698.6	0.00372	3698.6	0.00382		3698.6	0.00333	3698.6	0.00267		3698.6	0.00553	3698.6	0.0024		3698.6	0.02064	3698.6	0.01679		3698.6	0.00308	3698.6	0.00389		3396.96	0.00071	3396.96	0.0009		3698.6	0.00828	3698.6	0.00845		3394.67	0.14088
3697.17	0.00392	3697.17	0.00445		3697.17	0.00398	3697.17	0.00318		3697.17	0.00558	3697.17	0.00312		3697.17	0.02062	3697.17	0.01753		3697.17	0.00319	3697.17	0.00387		3394.1	0.00092	3394.1	-1e-05		3697.17	0.00887	3697.17	0.00822		3391.81	0.14813
3695.74	0.00409	3695.74	0.00504		3695.74	0.00466	3695.74	0.00368		3695.74	0.00569	3695.74	0.00401		3695.74	0.02024	3695.74	0.01783		3695.74	0.00327	3695.74	0.00382		3391.24	0.00161	3391.24	0.00076		3695.74	0.00901	3695.74	0.00768		3388.95	0.15497
3694.31	0.00415	3694.31	0.00541		3694.31	0.00507	3694.31	0.00396		3694.31	0.00573	3694.31	0.00469		3694.31	0.01934	3694.31	0.01752		3694.31	0.00323	3694.31	0.00373		3388.38	0.00211	3388.38	0.00238		3694.31	0.00871	3694.31	0.00695		3386.1	0.16159
3692.89	0.00409	3692.89	0.00543		3692.89	0.00484	3692.89	0.00376		3692.89	0.00561	3692.89	0.00486		3692.89	0.01827	3692.89	0.01669		3692.89	0.00292	3692.89	0.00329		3385.52	0.00217	3385.52	0.00318		3692.89	0.00752	3692.89	0.00572		3383.24	0.16795
3691.46	0.00377	3691.46	0.00495		3691.46	0.00393	3691.46	0.00305		3691.46	0.0053	3691.46	0.00438		3691.46	0.01732	3691.46	0.01545		3691.46	0.00226	3691.46	0.00229		3382.66	0.00223	3382.66	0.00237		3691.46	0.00513	3691.46	0.00393		3380.38	0.17381
3690.03	0.00322	3690.03	0.004		3690.03	0.00284	3690.03	0.00229		3690.03	0.00502	3690.03	0.00344		3690.03	0.01647	3690.03	0.01396		3690.03	0.00154	3690.03	0.00115		3379.8	0.00277	3379.8	0.00082		3690.03	0.00233	3690.03	0.0023		3377.53	0.17882
3688.6	0.00271	3688.6	0.00296		3688.6	0.00222	3688.6	0.00201		3688.6	0.00498	3688.6	0.00252		3688.6	0.01575	3688.6	0.01261		3688.6	0.00126	3688.6	0.00074		3376.94	0.00358	3376.94	6e-05		3688.6	0.00077	3688.6	0.00208		3374.67	0.18254
3687.17	0.00261	3687.17	0.00236		3687.17	0.00224	3687.17	0.00222		3687.17	0.00523	3687.17	0.002		3687.17	0.01545	3687.17	0.01187		3687.17	0.0016	3687.17	0.00123		3374.08	0.00408	3374.08	0.00066		3687.17	0.00131	3687.17	0.00332		3371.81	0.18471
3685.74	0.00291	3685.74	0.00238		3685.74	0.0027	3685.74	0.00273		3685.74	0.00579	3685.74	0.00214		3685.74	0.01593	3685.74	0.0119		3685.74	0.00216	3685.74	0.00209		3371.22	0.00415	3371.22	0.00186		3685.74	0.0031	3685.74	0.0051		3368.95	0.18579
3684.31	0.00335	3684.31	0.00276		3684.31	0.00339	3684.31	0.00338		3684.31	0.00652	3684.31	0.00287		3684.31	0.01698	3684.31	0.0124		3684.31	0.00258	3684.31	0.00273		3368.36	0.00436	3368.36	0.00263		3684.31	0.00525	3684.31	0.00664		3366.1	0.18673
3682.88	0.00368	3682.88	0.00321		3682.88	0.00412	3682.88	0.00402		3682.88	0.00719	3682.88	0.00389		3682.88	0.01794	3682.88	0.0129		3682.88	0.0027	3682.88	0.00302		3365.5	0.00535	3365.5	0.00284		3682.88	0.00729	3682.88	0.00768		3363.24	0.18782
3681.45	0.00385	3681.45	0.00357		3681.45	0.00478	3681.45	0.00454		3681.45	0.00755	3681.45	0.00492		3681.45	0.01824	3681.45	0.01311		3681.45	0.00263	3681.45	0.00311		3362.64	0.00739	3362.64	0.00332		3681.45	0.00911	3681.45	0.00817		3360.38	0.18841
3680.02	0.00396	3680.02	0.00388		3680.02	0.00542	3680.02	0.00501		3680.02	0.0076	3680.02	0.00587		3680.02	0.01796	3680.02	0.01316		3680.02	0.0025	3680.02	0.00314		3359.78	0.01047	3359.78	0.00501		3680.02	0.0106	3680.02	0.00828		3357.53	0.18802
3678.59	0.00427	3678.59	0.00434		3678.59	0.00621	3678.59	0.00554		3678.59	0.00757	3678.59	0.0068		3678.59	0.01793	3678.59	0.01366		3678.59	0.00282	3678.59	0.00336		3356.92	0.01454	3356.92	0.00791		3678.59	0.01154	3678.59	0.00815		3354.67	0.18708
3677.16	0.00486	3677.16	0.00502		3677.16	0.00707	3677.16	0.00613		3677.16	0.00754	3677.16	0.00751		3677.16	0.01863	3677.16	0.01494		3677.16	0.00372	3677.16	0.00384		3354.06	0.0193	3354.06	0.01127		3677.16	0.01152	3677.16	0.00784		3351.81	0.18628
3675.73	0.00527	3675.73	0.00552		3675.73	0.00766	3675.73	0.00656		3675.73	0.00729	3675.73	0.0075		3675.73	0.01869	3675.73	0.01611		3675.73	0.00463	3675.73	0.00447		3351.2	0.02422	3351.2	0.01437		3675.73	0.01032	3675.73	0.00743		3348.95	0.18587
3674.3	0.00501	3674.3	0.00536		3674.3	0.00757	3674.3	0.00655		3674.3	0.00671	3674.3	0.0066		3674.3	0.01692	3674.3	0.01603		3674.3	0.00464	3674.3	0.00483		3348.35	0.02889	3348.35	0.01701		3674.3	0.00829	3674.3	0.00691		3346.1	0.18571
3672.87	0.00443	3672.87	0.0048		3672.87	0.00691	3672.87	0.00618		3672.87	0.00635	3672.87	0.00559		3672.87	0.01552	3672.87	0.01565		3672.87	0.00388	3672.87	0.00454		3345.49	0.03313	3345.49	0.01932		3672.87	0.00623	3672.87	0.00618		3343.24	0.18592
3671.44	0.00413	3671.44	0.00432		3671.44	0.00624	3671.44	0.00582		3671.44	0.00668	3671.44	0.00516		3671.44	0.01681	3671.44	0.01631		3671.44	0.0033	3671.44	0.00383		3342.63	0.03671	3342.63	0.02133		3671.44	0.00494	3671.44	0.00554		3340.38	0.18698
3670.01	0.00403	3670.01	0.00384		3670.01	0.00581	3670.01	0.00553		3670.01	0.00729	3670.01	0.00501		3670.01	0.01926	3670.01	0.01737		3670.01	0.00317	3670.01	0.00325		3339.77	0.03956	3339.77	0.02303		3670.01	0.00494	3670.01	0.00563		3337.52	0.18934
3668.58	0.00375	3668.58	0.00324		3668.58	0.0056	3668.58	0.00527		3668.58	0.00759	3668.58	0.00475		3668.58	0.0202	3668.58	0.01748		3668.58	0.00304	3668.58	0.00304		3336.91	0.04251	3336.91	0.0248		3668.58	0.006	3668.58	0.00658		3334.67	0.1934
3667.15	0.00342	3667.15	0.00284		3667.15	0.00553	3667.15	0.00502		3667.15	0.00756	3667.15	0.00459		3667.15	0.01987	3667.15	0.01686		3667.15	0.00272	3667.15	0.003		3334.05	0.047	3334.05	0.02741		3667.15	0.00713	3667.15	0.00758		3331.81	0.19977
3665.72	0.00333	3665.72	0.00294		3665.72	0.00566	3665.72	0.00492		3665.72	0.00755	3665.72	0.00489		3665.72	0.01989	3665.72	0.01642		3665.72	0.00249	3665.72	0.00303		3331.19	0.05348	3331.19	0.03109		3665.72	0.00779	3665.72	0.00803		3328.95	0.20915
3664.29	0.00345	3664.29	0.00336		3664.29	0.00593	3664.29	0.00493		3664.29	0.0075	3664.29	0.00548		3664.29	0.02042	3664.29	0.01621		3664.29	0.00253	3664.29	0.00314		3328.33	0.06025	3328.33	0.03477		3664.29	0.0081	3664.29	0.00791		3326.1	0.22181
3662.86	0.00359	3662.86	0.00382		3662.86	0.00614	3662.86	0.00484		3662.86	0.00715	3662.86	0.00593		3662.86	0.02066	3662.86	0.01574		3662.86	0.00271	3662.86	0.00326		3325.47	0.06441	3325.47	0.03653		3662.86	0.00813	3662.86	0.00732		3323.24	0.23782
3661.43	0.00364	3661.43	0.00418		3661.43	0.00615	3661.43	0.00461		3661.43	0.00644	3661.43	0.006		3661.43	0.02022	3661.43	0.01492		3661.43	0.00286	3661.43	0.00325		3322.61	0.06378	3322.61	0.03514		3661.43	0.00777	3661.43	0.00639		3320.38	0.25778
3660	0.0037	3660	0.00447		3660	0.00593	3660	0.00434		3660	0.00565	3660	0.00577		3660	0.01957	3660	0.01415		3660	0.00301	3660	0.00308		3319.75	0.05837	3319.75	0.03119		3660	0.00695	3660	0.00533		3317.52	0.28268
3658.57	0.00393	3658.57	0.0048		3658.57	0.00548	3658.57	0.00419		3658.57	0.00516	3658.57	0.00547		3658.57	0.01931	3658.57	0.01394		3658.57	0.00337	3658.57	0.0029		3316.89	0.05039	3316.89	0.0265		3658.57	0.00585	3658.57	0.00449		3314.67	0.31288
3657.14	0.00431	3657.14	0.00512		3657.14	0.0049	3657.14	0.00419		3657.14	0.00514	3657.14	0.00516		3657.14	0.01914	3657.14	0.0142		3657.14	0.00397	3657.14	0.00297		3314.03	0.04272	3314.03	0.02255		3657.14	0.00491	3657.14	0.00427		3311.81	0.348
3655.71	0.00458	3655.71	0.00517		3655.71	0.00436	3655.71	0.00421		3655.71	0.00547	3655.71	0.00479		3655.71	0.01813	3655.71	0.01429		3655.71	0.00435	3655.71	0.00317		3311.17	0.03707	3311.17	0.01956		3655.71	0.00447	3655.71	0.00471		3308.95	0.38723
3654.28	0.00451	3654.28	0.00481		3654.28	0.00392	3654.28	0.004		3654.28	0.00596	3654.28	0.00436		3654.28	0.01646	3654.28	0.01398		3654.28	0.00396	3654.28	0.00294		3308.31	0.03322	3308.31	0.01708		3654.28	0.00421	3654.28	0.0051		3306.1	0.43027
3652.85	0.00414	3652.85	0.00414		3652.85	0.00347	3652.85	0.00342		3652.85	0.00638	3652.85	0.00394		3652.85	0.01538	3652.85	0.01366		3652.85	0.00273	3652.85	0.0018		3305.45	0.03013	3305.45	0.01496		3652.85	0.00338	3652.85	0.00453		3303.24	0.47612
3651.42	0.00351	3651.42	0.00316		3651.42	0.00302	3651.42	0.00271		3651.42	0.00654	3651.42	0.00356		3651.42	0.01517	3651.42	0.01348		3651.42	0.00118	3651.42	0.00017		3302.6	0.02735	3302.6	0.01356		3651.42	0.00201	3651.42	0.00303		3300.38	0.52154
3649.99	0.00271	3649.99	0.00207		3649.99	0.00327	3649.99	0.00274		3649.99	0.00654	3649.99	0.00353		3649.99	0.0149	3649.99	0.01329		3649.99	0.00035	3649.99	-0.00043		3299.74	0.02518	3299.74	0.01302		3649.99	0.00156	3649.99	0.00214		3297.52	0.56202
3648.56	0.00222	3648.56	0.00151		3648.56	0.00473	3648.56	0.00401		3648.56	0.00663	3648.56	0.00424		3648.56	0.01441	3648.56	0.01339		3648.56	0.00115	3648.56	0.00117		3296.88	0.02391	3296.88	0.01284		3648.56	0.00355	3648.56	0.00335		3294.67	0.59374
3647.14	0.00244	3647.14	0.00187		3647.14	0.00634	3647.14	0.00535		3647.14	0.00653	3647.14	0.00513		3647.14	0.01446	3647.14	0.01384		3647.14	0.00297	3647.14	0.00385		3294.02	0.0232	3294.02	0.01238		3647.14	0.00696	3647.14	0.00569		3291.81	0.61655
3645.71	0.00311	3645.71	0.0027		3645.71	0.0071	3645.71	0.00584		3645.71	0.00618	3645.71	0.00563		3645.71	0.01528	3645.71	0.01441		3645.71	0.00453	3645.71	0.00571		3291.16	0.0226	3291.16	0.01155		3645.71	0.0094	3645.71	0.00725		3288.95	0.63285
3644.28	0.00388	3644.28	0.00358		3644.28	0.00722	3644.28	0.00581		3644.28	0.00594	3644.28	0.00585		3644.28	0.01671	3644.28	0.01504		3644.28	0.00552	3644.28	0.00636		3288.3	0.02229	3288.3	0.01092		3644.28	0.01011	3644.28	0.0076		3286.1	0.64103
3642.85	0.00461	3642.85	0.00438		3642.85	0.00702	3642.85	0.00565		3642.85	0.00587	3642.85	0.00591		3642.85	0.01841	3642.85	0.01562		3642.85	0.00625	3642.85	0.00635		3285.44	0.02281	3285.44	0.01097		3642.85	0.00954	3642.85	0.00733		3283.24	0.63909
3641.42	0.00519	3641.42	0.00507		3641.42	0.00655	3641.42	0.0054		3641.42	0.00582	3641.42	0.00572		3641.42	0.01983	3641.42	0.01596		3641.42	0.00678	3641.42	0.0061		3282.58	0.02389	3282.58	0.01144		3641.42	0.00834	3641.42	0.00693		3280.38	0.62364
3639.99	0.00557	3639.99	0.00555		3639.99	0.00585	3639.99	0.00501		3639.99	0.00573	3639.99	0.00529		3639.99	0.02072	3639.99	0.01602		3639.99	0.00693	3639.99	0.0057		3279.72	0.02412	3279.72	0.01154		3639.99	0.0069	3639.99	0.00658		3277.52	0.58951
3638.56	0.00575	3638.56	0.00577		3638.56	0.00512	3638.56	0.00462		3638.56	0.00574	3638.56	0.00486		3638.56	0.02119	3638.56	0.01595		3638.56	0.00659	3638.56	0.00512		3276.86	0.02228	3276.86	0.01068		3638.56	0.00554	3638.56	0.00625		3274.67	0.53761
3637.13	0.00577	3637.13	0.00572		3637.13	0.00459	3637.13	0.00438		3637.13	0.00597	3637.13	0.00468		3637.13	0.0214	3637.13	0.01586		3637.13	0.00585	3637.13	0.0044		3274	0.01865	3274	0.00901		3637.13	0.00451	3637.13	0.00589		3271.81	0.47647
3635.7	0.00565	3635.7	0.00543		3635.7	0.00438	3635.7	0.00432		3635.7	0.00637	3635.7	0.0048		3635.7	0.02131	3635.7	0.01574		3635.7	0.00493	3635.7	0.00369		3271.14	0.01466	3271.14	0.00723		3635.7	0.00403	3635.7	0.0055		3268.95	0.41555
3634.27	0.00532	3634.27	0.0049		3634.27	0.0045	3634.27	0.00443		3634.27	0.00683	3634.27	0.00516		3634.27	0.02069	3634.27	0.01546		3634.27	0.00404	3634.27	0.00321		3268.28	0.01155	3268.28	0.00582		3634.27	0.00423	3634.27	0.00513		3266.09	0.36073
3632.84	0.00484	3632.84	0.00421		3632.84	0.00488	3632.84	0.00469		3632.84	0.0073	3632.84	0.00576		3632.84	0.01979	3632.84	0.01515		3632.84	0.00342	3632.84	0.00312		3265.42	0.00958	3265.42	0.00475		3632.84	0.00512	3632.84	0.00497		3263.24	0.31425
3631.41	0.00441	3631.41	0.00362		3631.41	0.00548	3631.41	0.0051		3631.41	0.00775	3631.41	0.00653		3631.41	0.01951	3631.41	0.01529		3631.41	0.00346	3631.41	0.00355		3262.56	0.00828	3262.56	0.00382		3631.41	0.00653	3631.41	0.00514		3260.38	0.27579
3629.98	0.00414	3629.98	0.00331		3629.98	0.00614	3629.98	0.00558		3629.98	0.00788	3629.98	0.00715		3629.98	0.01982	3629.98	0.01588		3629.98	0.0045	3629.98	0.00463		3259.7	0.00697	3259.7	0.00303		3629.98	0.00833	3629.98	0.00579		3257.52	0.24373
3628.55	0.00385	3628.55	0.00317		3628.55	0.00663	3628.55	0.0059		3628.55	0.00731	3628.55	0.00706		3628.55	0.019	3628.55	0.01595		3628.55	0.00613	3628.55	0.00614		3256.84	0.00511	3256.84	0.00256		3628.55	0.01015	3628.55	0.00687		3254.67	0.21654
3627.12	0.0035	3627.12	0.0031		3627.12	0.00665	3627.12	0.00577		3627.12	0.00619	3627.12	0.0062		3627.12	0.01646	3627.12	0.01497		3627.12	0.00729	3627.12	0.00722		3253.99	0.00292	3253.99	0.00235		3627.12	0.01101	3627.12	0.00769		3251.81	0.19338
3625.69	0.00335	3625.69	0.00321		3625.69	0.00621	3625.69	0.00522		3625.69	0.00523	3625.69	0.00526		3625.69	0.01407	3625.69	0.01385		3625.69	0.00742	3625.69	0.00715		3251.13	0.00143	3251.13	0.00214		3625.69	0.01031	3625.69	0.00755		3248.95	0.1739
3624.26	0.0035	3624.26	0.0035		3624.26	0.00552	3624.26	0.00454		3624.26	0.00483	3624.26	0.00468		3624.26	0.01307	3624.26	0.01332		3624.26	0.00683	3624.26	0.00618		3248.27	0.00163	3248.27	0.00182		3624.26	0.00851	3624.26	0.00658		3246.09	0.15797
3622.83	0.00375	3622.83	0.00378		3622.83	0.00466	3622.83	0.00384		3622.83	0.00478	3622.83	0.00434		3622.83	0.01318	3622.83	0.01325		3622.83	0.00602	3622.83	0.00483		3245.41	0.00337	3245.41	0.00165		3622.83	0.00636	3622.83	0.00526		3243.24	0.14535
3621.4	0.00396	3621.4	0.00396		3621.4	0.00371	3621.4	0.00321		3621.4	0.00486	3621.4	0.00408		3621.4	0.01376	3621.4	0.01329		3621.4	0.00534	3621.4	0.00358		3242.55	0.00524	3242.55	0.00184		3621.4	0.00447	3621.4	0.00398		3240.38	0.13537
3619.97	0.0041	3619.97	0.004		3619.97	0.00304	3619.97	0.00294		3619.97	0.00511	3619.97	0.00398		3619.97	0.01429	3619.97	0.01318		3619.97	0.00494	3619.97	0.00288		3239.69	0.00605	3239.69	0.00223		3619.97	0.00341	3619.97	0.00325		3237.52	0.12708
3618.54	0.00412	3618.54	0.0039		3618.54	0.00308	3618.54	0.00322		3618.54	0.0056	3618.54	0.0042		3618.54	0.01435	3618.54	0.01276		3618.54	0.00465	3618.54	0.00289		3236.83	0.00562	3236.83	0.00233		3618.54	0.00351	3618.54	0.00334		3234.67	0.11975
3617.11	0.00398	3617.11	0.00366		3617.11	0.00373	3617.11	0.00386		3617.11	0.00624	3617.11	0.00467		3617.11	0.01435	3617.11	0.01228		3617.11	0.00411	3617.11	0.00318		3233.97	0.00473	3233.97	0.00189		3617.11	0.00433	3617.11	0.00388		3231.81	0.1133
3615.68	0.0038	3615.68	0.00341		3615.68	0.00469	3615.68	0.00454		3615.68	0.00689	3615.68	0.00531		3615.68	0.01524	3615.68	0.01227		3615.68	0.0034	3615.68	0.00336		3231.11	0.00477	3231.11	0.00148		3615.68	0.00531	3615.68	0.00432		3228.95	0.10801
3614.25	0.00367	3614.25	0.00321		3614.25	0.00582	3614.25	0.00521		3614.25	0.0075	3614.25	0.00609		3614.25	0.01703	3614.25	0.01284		3614.25	0.00299	3614.25	0.00359		3228.25	0.00611	3228.25	0.00161		3614.25	0.00646	3614.25	0.00477		3226.09	0.10381
3612.82	0.00363	3612.82	0.00305		3612.82	0.007	3612.82	0.00588		3612.82	0.00795	3612.82	0.0068		3612.82	0.01873	3612.82	0.01354		3612.82	0.00318	3612.82	0.00419		3225.39	0.00768	3225.39	0.00225		3612.82	0.00792	3612.82	0.00556		3223.24	0.10022
3611.39	0.00372	3611.39	0.00298		3611.39	0.00781	3611.39	0.00635		3611.39	0.00808	3611.39	0.0072		3611.39	0.01982	3611.39	0.01413		3611.39	0.00398	3611.39	0.00508		3222.53	0.00809	3222.53	0.0027		3611.39	0.00929	3611.39	0.00651		3220.38	0.09683
3609.96	0.00401	3609.96	0.00311		3609.96	0.00785	3609.96	0.00637		3609.96	0.00778	3609.96	0.00708		3609.96	0.02056	3609.96	0.01474		3609.96	0.00523	3609.96	0.0059		3219.67	0.00728	3219.67	0.0024		3609.96	0.00999	3609.96	0.00713		3217.52	0.0936
3608.53	0.00433	3608.53	0.0034		3608.53	0.00706	3608.53	0.00581		3608.53	0.00695	3608.53	0.00633		3608.53	0.02074	3608.53	0.01515		3608.53	0.0066	3608.53	0.0064		3216.81	0.00647	3216.81	0.00166		3608.53	0.00975	3608.53	0.00726		3214.67	0.09053
3607.1	0.0044	3607.1	0.00368		3607.1	0.00572	3607.1	0.00479		3607.1	0.00568	3607.1	0.00511		3607.1	0.01965	3607.1	0.01494		3607.1	0.00752	3607.1	0.00639		3213.95	0.0064	3213.95	0.00138		3607.1	0.00866	3607.1	0.00703		3211.81	0.08727
3605.67	0.00418	3605.67	0.00384		3605.67	0.00429	3605.67	0.0037		3605.67	0.00442	3605.67	0.0039		3605.67	0.01753	3605.67	0.01417		3605.67	0.00754	3605.67	0.00577		3211.09	0.00638	3211.09	0.00191		3605.67	0.00687	3605.67	0.00642		3208.95	0.08356
3604.24	0.00387	3604.24	0.00394		3604.24	0.00321	3604.24	0.00291		3604.24	0.00367	3604.24	0.00318		3604.24	0.01538	3604.24	0.01338		3604.24	0.00677	3604.24	0.00467		3208.24	0.00548	3208.24	0.00264		3604.24	0.00465	3604.24	0.0054		3206.09	0.07961
3602.81	0.00366	3602.81	0.00398		3602.81	0.00266	3602.81	0.00258		3602.81	0.00359	3602.81	0.00304		3602.81	0.01364	3602.81	0.01275		3602.81	0.0056	3602.81	0.00346		3205.38	0.00369	3205.38	0.0026		3602.81	0.00244	3602.81	0.00409		3203.24	0.07595
3601.39	0.00357	3601.39	0.00388		3601.39	0.00262	3601.39	0.00263		3601.39	0.00406	3601.39	0.00334		3601.39	0.01207	3601.39	0.01209		3601.39	0.00435	3601.39	0.00251		3202.52	0.00194	3202.52	0.00161		3601.39	0.00086	3601.39	0.00287		3200.38	0.07275
3599.96	0.00361	3599.96	0.00362		3599.96	0.00302	3599.96	0.00294		3599.96	0.00488	3599.96	0.00394		3599.96	0.01069	3599.96	0.01135		3599.96	0.00331	3599.96	0.0021		3199.66	0.00134	3199.66	0.00061		3599.96	0.00057	3599.96	0.00221		3197.52	0.06988
3598.53	0.00385	3598.53	0.00336		3598.53	0.00372	3598.53	0.00331		3598.53	0.00587	3598.53	0.00474		3598.53	0.01019	3598.53	0.01094		3598.53	0.00277	3598.53	0.0023		3196.8	0.00239	3196.8	0.00067		3598.53	0.00165	3598.53	0.00232		3194.66	0.06736
3597.1	0.00424	3597.1	0.00325		3597.1	0.00451	3597.1	0.00359		3597.1	0.00681	3597.1	0.00553		3597.1	0.01112	3597.1	0.01124		3597.1	0.00286	3597.1	0.00299		3193.94	0.0042	3193.94	0.00182		3597.1	0.00349	3597.1	0.00303		3191.81	0.06525
3595.67	0.00453	3595.67	0.00323		3595.67	0.00511	3595.67	0.00368		3595.67	0.00732	3595.67	0.00597		3595.67	0.01312	3595.67	0.01207		3595.67	0.00343	3595.67	0.00389		3191.08	0.00501	3191.08	0.00287		3595.67	0.00532	3595.67	0.00396		3188.95	0.06334
3594.24	0.00444	3594.24	0.00316		3594.24	0.0053	3594.24	0.00355		3594.24	0.00716	3594.24	0.00584		3594.24	0.01512	3594.24	0.01279		3594.24	0.00417	3594.24	0.00468		3188.22	0.00394	3188.22	0.0027		3594.24	0.00667	3594.24	0.00484		3186.09	0.06128
3592.81	0.00399	3592.81	0.00299		3592.81	0.00504	3592.81	0.00327		3592.81	0.00647	3592.81	0.00528		3592.81	0.01649	3592.81	0.01307		3592.81	0.00485	3592.81	0.00514		3185.36	0.002	3185.36	0.00151		3592.81	0.00736	3592.81	0.00551		3183.24	0.05909
3591.38	0.00353	3591.38	0.00288		3591.38	0.0045	3591.38	0.00299		3591.38	0.00577	3591.38	0.00472		3591.38	0.01763	3591.38	0.01322		3591.38	0.00538	3591.38	0.00515		3182.5	0.00095	3182.5	0.00062		3591.38	0.00737	3591.38	0.00576		3180.38	0.05712
3589.95	0.00338	3589.95	0.00295		3589.95	0.00386	3589.95	0.00277		3589.95	0.00533	3589.95	0.00437		3589.95	0.01908	3589.95	0.01356		3589.95	0.00569	3589.95	0.00471		3179.64	0.00159	3179.64	0.00095		3589.95	0.00664	3589.95	0.00542		3177.52	0.05559
3588.52	0.00348	3588.52	0.0031		3588.52	0.00317	3588.52	0.00259		3588.52	0.00499	3588.52	0.00407		3588.52	0.02038	3588.52	0.01384		3588.52	0.00564	3588.52	0.00392		3176.78	0.00324	3176.78	0.00212		3588.52	0.0052	3588.52	0.00452		3174.66	0.05438
3587.09	0.00357	3587.09	0.00321		3587.09	0.00258	3587.09	0.00247		3587.09	0.00447	3587.09	0.00361		3587.09	0.02035	3587.09	0.01358		3587.09	0.00512	3587.09	0.0031		3173.92	0.00426	3173.92	0.00275		3587.09	0.00337	3587.09	0.0034		3171.81	0.05318
3585.66	0.00358	3585.66	0.00333		3585.66	0.00233	3585.66	0.00242		3585.66	0.00392	3585.66	0.00319		3585.66	0.01888	3585.66	0.01292		3585.66	0.00439	3585.66	0.00263		3171.06	0.00373	3171.06	0.0021		3585.66	0.0017	3585.66	0.00248		3168.95	0.05195
3584.23	0.00373	3584.23	0.0036		3584.23	0.00256	3584.23	0.00245		3584.23	0.0038	3584.23	0.00318		3584.23	0.01732	3584.23	0.01256		3584.23	0.00386	3584.23	0.0026		3168.2	0.00246	3168.2	0.00088		3584.23	0.0007	3584.23	0.0019		3166.09	0.0509
3582.8	0.00414	3582.8	0.00403		3582.8	0.00319	3582.8	0.00257		3582.8	0.00436	3582.8	0.00371		3582.8	0.01641	3582.8	0.01272		3582.8	0.00374	3582.8	0.00291		3165.34	0.00225	3165.34	0.00045		3582.8	0.00062	3582.8	0.00174		3163.24	0.05007
3581.37	0.00468	3581.37	0.00442		3581.37	0.00391	3581.37	0.00267		3581.37	0.00529	3581.37	0.00453		3581.37	0.01575	3581.37	0.01301		3581.37	0.00398	3581.37	0.00346		3162.49	0.00384	3162.49	0.00136		3581.37	0.0014	3581.37	0.002		3160.38	0.04921
3579.94	0.00508	3579.94	0.0046		3579.94	0.00441	3579.94	0.0027		3579.94	0.0061	3579.94	0.00521		3579.94	0.01472	3579.94	0.01306		3579.94	0.00443	3579.94	0.00412		3159.63	0.00596	3159.63	0.00274		3579.94	0.00292	3579.94	0.00276		3157.52	0.04809
3578.51	0.00522	3578.51	0.00456		3578.51	0.00457	3578.51	0.00266		3578.51	0.00644	3578.51	0.00547		3578.51	0.01334	3578.51	0.01278		3578.51	0.00507	3578.51	0.00473		3156.77	0.00668	3156.77	0.00325		3578.51	0.00474	3578.51	0.00388		3154.66	0.04687
3577.08	0.00516	3577.08	0.00442		3577.08	0.0044	3577.08	0.0026		3577.08	0.00627	3577.08	0.00528		3577.08	0.01208	3577.08	0.0124		3577.08	0.00589	3577.08	0.00519		3153.91	0.00542	3153.91	0.00249		3577.08	0.00635	3577.08	0.00511		3151.81	0.0459
3575.65	0.005	3575.65	0.00431		3575.65	0.00408	3575.65	0.0026		3575.65	0.00575	3575.65	0.0048		3575.65	0.01142	3575.65	0.01208		3575.65	0.00682	3575.65	0.00549		3151.05	0.00331	3151.05	0.00138		3575.65	0.00737	3575.65	0.00617		3148.95	0.0453
3574.22	0.00473	3574.22	0.00422		3574.22	0.00377	3574.22	0.00269		3574.22	0.00513	3574.22	0.00421		3574.22	0.01134	3574.22	0.01184		3574.22	0.0076	3574.22	0.00561		3148.19	0.00193	3148.19	0.00114		3574.22	0.00757	3574.22	0.00689		3146.09	0.04483
3572.79	0.00433	3572.79	0.00411		3572.79	0.00353	3572.79	0.00284		3572.79	0.00457	3572.79	0.00368		3572.79	0.01161	3572.79	0.0116		3572.79	0.00799	3572.79	0.00551		3145.33	0.00216	3145.33	0.00207		3572.79	0.00686	3572.79	0.00698		3143.24	0.0443
3571.36	0.0038	3571.36	0.00392		3571.36	0.00324	3571.36	0.00291		3571.36	0.00404	3571.36	0.00321		3571.36	0.01214	3571.36	0.01137		3571.36	0.0079	3571.36	0.00511		3142.47	0.00348	3142.47	0.00333		3571.36	0.00534	3571.36	0.00625		3140.38	0.04378
3569.93	0.00328	3569.93	0.00366		3569.93	0.00277	3569.93	0.0028		3569.93	0.00346	3569.93	0.00282		3569.93	0.0132	3569.93	0.01129		3569.93	0.00762	3569.93	0.00457		3139.61	0.0044	3139.61	0.00386		3569.93	0.00342	3569.93	0.00476		3137.52	0.04335
3568.5	0.00298	3568.5	0.00346		3568.5	0.00231	3568.5	0.00259		3568.5	0.00289	3568.5	0.0026		3568.5	0.01486	3568.5	0.01149		3568.5	0.00756	3568.5	0.00429		3136.75	0.00405	3136.75	0.0033		3568.5	0.0019	3568.5	0.00304		3134.66	0.04296
3567.07	0.00302	3567.07	0.00339		3567.07	0.00227	3567.07	0.00248		3567.07	0.00255	3567.07	0.00266		3567.07	0.01665	3567.07	0.01184		3567.07	0.00785	3567.07	0.0046		3133.89	0.00327	3133.89	0.00225		3567.07	0.0015	3567.07	0.00186		3131.81	0.04248
3565.64	0.00333	3565.64	0.00343		3565.64	0.00269	3565.64	0.00244		3565.64	0.00263	3565.64	0.00297		3565.64	0.01793	3565.64	0.01215		3565.64	0.00811	3565.64	0.00518		3131.03	0.00347	3131.03	0.00173		3565.64	0.00214	3565.64	0.00155		3128.95	0.04179
3564.21	0.00368	3564.21	0.00353		3564.21	0.00311	3564.21	0.00224		3564.21	0.00307	3564.21	0.00335		3564.21	0.0187	3564.21	0.01251		3564.21	0.00798	3564.21	0.00537		3128.17	0.00481	3128.17	0.00225		3564.21	0.00301	3564.21	0.00172		3126.09	0.0408
3562.78	0.00396	3562.78	0.00364		3562.78	0.0032	3562.78	0.00187		3562.78	0.00374	3562.78	0.00373		3562.78	0.01932	3562.78	0.01309		3562.78	0.00765	3562.78	0.00506		3125.31	0.00607	3125.31	0.00329		3562.78	0.00369	3562.78	0.00204		3123.23	0.03955
3561.35	0.00418	3561.35	0.00379		3561.35	0.00305	3561.35	0.00156		3561.35	0.0045	3561.35	0.00407		3561.35	0.0197	3561.35	0.01378		3561.35	0.00758	3561.35	0.00465		3122.45	0.00603	3122.45	0.00398		3561.35	0.00441	3561.35	0.00262		3120.38	0.03825
3559.92	0.00437	3559.92	0.00393		3559.92	0.00291	3559.92	0.00149		3559.92	0.00515	3559.92	0.00427		3559.92	0.01943	3559.92	0.01426		3559.92	0.00801	3559.92	0.00457		3119.59	0.0047	3119.59	0.00362		3559.92	0.00537	3559.92	0.00363		3117.52	0.037
3558.49	0.0045	3558.49	0.00403		3558.49	0.00289	3558.49	0.0017		3558.49	0.0055	3558.49	0.00426		3558.49	0.0183	3558.49	0.01429		3558.49	0.00888	3558.49	0.00489		3116.73	0.00322	3116.73	0.00245		3558.49	0.00638	3558.49	0.00489		3114.66	0.03577
3557.06	0.00451	3557.06	0.00408		3557.06	0.00293	3557.06	0.00211		3557.06	0.00548	3557.06	0.00408		3557.06	0.01648	3557.06	0.01387		3557.06	0.00994	3557.06	0.00544		3113.88	0.00273	3113.88	0.00147		3557.06	0.00696	3557.06	0.00594		3111.81	0.0345
3555.64	0.00436	3555.64	0.00407		3555.64	0.00296	3555.64	0.00256		3555.64	0.00513	3555.64	0.00381		3555.64	0.01437	3555.64	0.01308		3555.64	0.01086	3555.64	0.00592		3111.02	0.00324	3111.02	0.00155		3555.64	0.0067	3555.64	0.00633		3108.95	0.03326
3554.21	0.0041	3554.21	0.00403		3554.21	0.00303	3554.21	0.00293		3554.21	0.00459	3554.21	0.00355		3554.21	0.0123	3554.21	0.01205		3554.21	0.01137	3554.21	0.00612		3108.16	0.0039	3108.16	0.00266		3554.21	0.00555	3554.21	0.00585		3106.09	0.03215
3552.78	0.00381	3552.78	0.00397		3552.78	0.00326	3552.78	0.00311		3552.78	0.004	3552.78	0.00331		3552.78	0.01044	3552.78	0.01087		3552.78	0.01136	3552.78	0.00605		3105.3	0.00392	3105.3	0.00386		3552.78	0.00395	3552.78	0.00471		3103.23	0.03116
3551.35	0.00354	3551.35	0.00393		3551.35	0.00361	3551.35	0.00309		3551.35	0.00347	3551.35	0.00316		3551.35	0.00901	3551.35	0.00977		3551.35	0.01092	3551.35	0.00585		3102.44	0.00313	3102.44	0.00408		3551.35	0.00249	3551.35	0.0034		3100.38	0.03004
3549.92	0.00334	3549.92	0.00391		3549.92	0.0039	3549.92	0.00287		3549.92	0.00315	3549.92	0.00312		3549.92	0.00847	3549.92	0.00908		3549.92	0.01022	3549.92	0.00557		3099.58	0.00217	3099.58	0.00313		3549.92	0.00138	3549.92	0.00219		3097.52	0.02865
3548.49	0.0032	3548.49	0.00386		3548.49	0.00394	3548.49	0.00244		3548.49	0.00314	3548.49	0.00321		3548.49	0.00911	3548.49	0.00896		3548.49	0.00937	3548.49	0.00511		3096.72	0.00202	3096.72	0.00196		3548.49	0.00049	3548.49	0.00105		3094.66	0.02712
3547.06	0.00312	3547.06	0.00366		3547.06	0.00377	3547.06	0.00188		3547.06	0.00345	3547.06	0.00333		3547.06	0.01076	3547.06	0.00923		3547.06	0.0085	3547.06	0.00439		3093.86	0.00298	3093.86	0.00176		3547.06	-0.00014	3547.06	-2e-05		3091.81	0.02569
3545.63	0.00313	3545.63	0.00333		3545.63	0.00357	3545.63	0.00138		3545.63	0.00403	3545.63	0.00341		3545.63	0.01303	3545.63	0.00978		3545.63	0.00796	3545.63	0.00367		3091	0.00411	3091	0.00278		3545.63	-4e-05	3545.63	-0.00054		3088.95	0.02443
3544.2	0.00332	3544.2	0.00308		3544.2	0.00355	3544.2	0.00119		3544.2	0.0048	3544.2	0.00351		3544.2	0.01565	3544.2	0.01072		3544.2	0.00812	3544.2	0.00337		3088.14	0.00412	3088.14	0.00407		3544.2	0.00111	3544.2	2e-05		3086.09	0.02318
3542.77	0.00374	3542.77	0.00311		3542.77	0.00377	3542.77	0.00144		3542.77	0.00558	3542.77	0.00369		3542.77	0.01841	3542.77	0.01208		3542.77	0.00909	3542.77	0.00373		3085.28	0.00277	3085.28	0.0044		3542.77	0.00299	3542.77	0.00165		3083.23	0.02178
3541.34	0.00426	3541.34	0.00338		3541.34	0.00406	3541.34	0.00201		3541.34	0.00612	3541.34	0.00386		3541.34	0.02091	3541.34	0.01358		3541.34	0.01059	3541.34	0.00455		3082.42	0.00118	3082.42	0.00351		3541.34	0.00478	3541.34	0.00366		3080.38	0.02023
3539.91	0.00468	3539.91	0.00369		3539.91	0.00417	3539.91	0.00261		3539.91	0.00623	3539.91	0.00388		3539.91	0.02267	3539.91	0.01481		3539.91	0.01216	3539.91	0.00545		3079.56	0.00081	3079.56	0.00238		3539.91	0.00577	3539.91	0.00519		3077.52	0.01878
3538.48	0.00485	3538.48	0.00392		3538.48	0.00407	3538.48	0.00305		3538.48	0.00588	3538.48	0.00371		3538.48	0.02334	3538.48	0.01547		3538.48	0.01347	3538.48	0.00618		3076.7	0.00186	3076.7	0.0022		3538.48	0.00572	3538.48	0.00577		3074.66	0.01768
3537.05	0.00481	3537.05	0.00412		3537.05	0.00397	3537.05	0.00328		3537.05	0.00527	3537.05	0.00349		3537.05	0.02278	3537.05	0.01551		3537.05	0.01442	3537.05	0.00682		3073.84	0.00331	3073.84	0.00309		3537.05	0.00494	3537.05	0.00546		3071.81	0.01699
3535.62	0.00471	3535.62	0.00437		3535.62	0.00405	3535.62	0.00334		3535.62	0.0047	3535.62	0.00342		3535.62	0.02112	3535.62	0.01504		3535.62	0.01508	3535.62	0.00757		3070.98	0.00397	3070.98	0.00414		3535.62	0.00401	3535.62	0.00475		3068.95	0.01657
3534.19	0.00471	3534.19	0.0047		3534.19	0.00428	3534.19	0.00323		3534.19	0.00437	3534.19	0.00356		3534.19	0.0188	3534.19	0.01426		3534.19	0.01551	3534.19	0.00842		3068.13	0.00345	3068.13	0.00426		3534.19	0.0033	3534.19	0.00399		3066.09	0.01623
3532.76	0.00481	3532.76	0.00498		3532.76	0.00442	3532.76	0.00296		3532.76	0.00434	3532.76	0.00383		3532.76	0.01631	3532.76	0.01328		3532.76	0.01569	3532.76	0.00905		3065.27	0.00254	3065.27	0.00328		3532.76	0.00289	3532.76	0.00326		3063.23	0.01589
3531.33	0.00494	3531.33	0.00507		3531.33	0.00438	3531.33	0.00261		3531.33	0.00462	3531.33	0.00413		3531.33	0.0139	3531.33	0.01211		3531.33	0.01565	3531.33	0.00921		3062.41	0.00243	3062.41	0.00215		3531.33	0.00278	3531.33	0.00263		3060.38	0.01554
3529.9	0.00507	3529.9	0.00495		3529.9	0.00428	3529.9	0.00234		3529.9	0.00523	3529.9	0.00444		3529.9	0.01173	3529.9	0.01081		3529.9	0.01547	3529.9	0.00888		3059.55	0.00335	3059.55	0.0019		3529.9	0.00304	3529.9	0.0023		3057.52	0.01514
3528.47	0.00516	3528.47	0.00466		3528.47	0.00425	3528.47	0.00229		3528.47	0.00612	3528.47	0.00474		3528.47	0.01002	3528.47	0.00955		3528.47	0.01528	3528.47	0.00826		3056.69	0.00431	3056.69	0.00266		3528.47	0.0036	3528.47	0.00243		3054.66	0.01469
3527.04	0.00513	3527.04	0.00429		3527.04	0.00432	3527.04	0.00243		3527.04	0.00703	3527.04	0.00496		3527.04	0.00906	3527.04	0.00861		3527.04	0.01514	3527.04	0.00754		3053.83	0.00428	3053.83	0.00364		3527.04	0.0042	3527.04	0.003		3051.8	0.01423
3525.61	0.00496	3525.61	0.00392		3525.61	0.00441	3525.61	0.00263		3525.61	0.00764	3525.61	0.00494		3525.61	0.00917	3525.61	0.00821		3525.61	0.01515	3525.61	0.00691		3050.97	0.0034	3050.97	0.00399		3525.61	0.00454	3525.61	0.00365		3048.95	0.01387
3524.18	0.0048	3524.18	0.00366		3524.18	0.00448	3524.18	0.00284		3524.18	0.00784	3524.18	0.00472		3524.18	0.01052	3524.18	0.00848		3524.18	0.01555	3524.18	0.00667		3048.11	0.0028	3048.11	0.00356		3524.18	0.00472	3524.18	0.00434		3046.09	0.01357
3522.75	0.00479	3522.75	0.00361		3522.75	0.00459	3522.75	0.00308		3522.75	0.00775	3522.75	0.00449		3522.75	0.01295	3522.75	0.00948		3522.75	0.01657	3522.75	0.00716		3045.25	0.00316	3045.25	0.00289		3522.75	0.00509	3522.75	0.00516		3043.23	0.01327
3521.32	0.00494	3521.32	0.00377		3521.32	0.00471	3521.32	0.00325		3521.32	0.00755	3521.32	0.00436		3521.32	0.01602	3521.32	0.01098		3521.32	0.01805	3521.32	0.00829		3042.39	0.004	3042.39	0.00257		3521.32	0.00556	3521.32	0.00591		3040.38	0.01306
3519.89	0.00511	3519.89	0.00408		3519.89	0.00471	3519.89	0.00322		3519.89	0.00726	3519.89	0.00436		3519.89	0.01923	3519.89	0.01267		3519.89	0.01943	3519.89	0.00962		3039.53	0.00452	3039.53	0.00271		3519.89	0.00568	3519.89	0.00618		3037.52	0.01318
3518.46	0.00517	3518.46	0.00437		3518.46	0.00448	3518.46	0.00286		3518.46	0.0068	3518.46	0.00433		3518.46	0.02197	3518.46	0.01411		3518.46	0.02022	3518.46	0.01061		3036.67	0.00435	3036.67	0.00305		3518.46	0.00511	3518.46	0.00562		3034.66	0.01365
3517.03	0.00506	3517.03	0.00455		3517.03	0.00405	3517.03	0.00222		3517.03	0.00615	3517.03	0.00416		3517.03	0.02373	3517.03	0.01499		3517.03	0.02035	3517.03	0.011		3033.81	0.00364	3033.81	0.00335		3517.03	0.00399	3517.03	0.00433		3031.8	0.01413
3515.6	0.00487	3515.6	0.00462		3515.6	0.00353	3515.6	0.0015		3515.6	0.00548	3515.6	0.00392		3515.6	0.02431	3515.6	0.01529		3515.6	0.02009	3515.6	0.01085		3030.95	0.0029	3030.95	0.00349		3515.6	0.00279	3515.6	0.00279		3028.95	0.01425
3514.17	0.00474	3514.17	0.00466		3514.17	0.00313	3514.17	0.001		3514.17	0.00512	3514.17	0.00379		3514.17	0.02388	3514.17	0.01517		3514.17	0.01985	3514.17	0.01039		3028.09	0.00269	3028.09	0.00341		3514.17	0.00198	3514.17	0.00154		3026.09	0.014
3512.74	0.00478	3512.74	0.00468		3512.74	0.00304	3512.74	0.00094		3512.74	0.00537	3512.74	0.00393		3512.74	0.02275	3512.74	0.01484		3512.74	0.01996	3512.74	0.00997		3025.23	0.00327	3025.23	0.00311		3512.74	0.00193	3512.74	0.00101		3023.23	0.01363
3511.31	0.005	3511.31	0.00468		3511.31	0.00333	3511.31	0.00139		3511.31	0.00626	3511.31	0.00432		3511.31	0.02114	3511.31	0.01438		3511.31	0.02054	3511.31	0.00986		3022.38	0.00425	3022.38	0.00279		3511.31	0.00276	3511.31	0.00136		3020.38	0.01321
3509.89	0.00527	3509.89	0.00461		3509.89	0.0039	3509.89	0.00211		3509.89	0.0075	3509.89	0.00478		3509.89	0.019	3509.89	0.01365		3509.89	0.02142	3509.89	0.01012		3019.52	0.00493	3019.52	0.00268		3509.89	0.00417	3509.89	0.00245		3017.52	0.0126
3508.46	0.00543	3508.46	0.00439		3508.46	0.00445	3508.46	0.00274		3508.46	0.00864	3508.46	0.00507		3508.46	0.01632	3508.46	0.01251		3508.46	0.02225	3508.46	0.01054		3016.66	0.00479	3016.66	0.00297		3508.46	0.00557	3508.46	0.00379		3014.66	0.01176
3507.03	0.00543	3507.03	0.00403		3507.03	0.0047	3507.03	0.00295		3507.03	0.00931	3507.03	0.00511		3507.03	0.01353	3507.03	0.01106		3507.03	0.02278	3507.03	0.01079		3013.8	0.00411	3013.8	0.00343		3507.03	0.00634	3507.03	0.00472		3011.8	0.01086
3505.6	0.00531	3505.6	0.0036		3505.6	0.00458	3505.6	0.0027		3505.6	0.0094	3505.6	0.00495		3505.6	0.01123	3505.6	0.00961		3505.6	0.02307	3505.6	0.01077		3010.94	0.00343	3010.94	0.00354		3505.6	0.00625	3505.6	0.00484		3008.95	0.01006
3504.17	0.00515	3504.17	0.00322		3504.17	0.00422	3504.17	0.00214		3504.17	0.00894	3504.17	0.00467		3504.17	0.00973	3504.17	0.0084		3504.17	0.02335	3504.17	0.01074		3008.08	0.00307	3008.08	0.00304		3504.17	0.00556	3504.17	0.00426		3006.09	0.00939
3502.74	0.00499	3502.74	0.00301		3502.74	0.00377	3502.74	0.00151		3502.74	0.00808	3502.74	0.00436		3502.74	0.00904	3502.74	0.00762		3502.74	0.0238	3502.74	0.01105		3005.22	0.00304	3005.22	0.00227		3502.74	0.00477	3502.74	0.00343		3003.23	0.00891
3501.31	0.00487	3501.31	0.00304		3501.31	0.0033	3501.31	0.00097		3501.31	0.007	3501.31	0.00407		3501.31	0.00932	3501.31	0.00744		3501.31	0.0244	3501.31	0.01172		3002.36	0.00315	3002.36	0.00192		3501.31	0.00414	3501.31	0.0026		3000.38	0.00873
3499.88	0.00479	3499.88	0.00327		3499.88	0.00284	3499.88	0.00056		3499.88	0.00596	3499.88	0.00382		3499.88	0.0107	3499.88	0.00791		3499.88	0.02494	3499.88	0.01233		2999.5	0.00318	2999.5	0.00227		3499.88	0.00362	3499.88	0.00172		2997.52	0.00889
3498.45	0.00476	3498.45	0.00358		3498.45	0.00251	3498.45	0.00036		3498.45	0.00516	3498.45	0.00361		3498.45	0.01297	3498.45	0.00884		3498.45	0.02526	3498.45	0.01253		2996.64	0.00306	2996.64	0.00297		3498.45	0.00313	3498.45	0.00076		2994.66	0.00927
3497.02	0.00477	3497.02	0.0039		3497.02	0.00254	3497.02	0.00046		3497.02	0.0048	3497.02	0.00348		3497.02	0.0156	3497.02	0.00995		3497.02	0.02548	3497.02	0.0124		2993.78	0.00294	2993.78	0.00317		3497.02	0.00279	3497.02	0		2991.8	0.00964
3495.59	0.00487	3495.59	0.00421		3495.59	0.003	3495.59	0.00091		3495.59	0.00501	3495.59	0.0035		3495.59	0.0181	3495.59	0.01108		3495.59	0.02585	3495.59	0.01228		2990.92	0.00293	2990.92	0.00255		3495.59	0.00283	3495.59	-9e-05		2988.95	0.0098
3494.16	0.00509	3494.16	0.00448		3494.16	0.00374	3494.16	0.00158		3494.16	0.00583	3494.16	0.00375		3494.16	0.02019	3494.16	0.01215		3494.16	0.02653	3494.16	0.01242		2988.06	0.00306	2988.06	0.00172		3494.16	0.00339	3494.16	0.00068		2986.09	0.00963
3492.73	0.00537	3492.73	0.00462		3492.73	0.00446	3492.73	0.00224		3492.73	0.00707	3492.73	0.00419		3492.73	0.02174	3492.73	0.01313		3492.73	0.02747	3492.73	0.01283		2985.2	0.00331	2985.2	0.00155		3492.73	0.00444	3492.73	0.0021		2983.23	0.00926
3491.3	0.00559	3491.3	0.00457		3491.3	0.00493	3491.3	0.00267		3491.3	0.0084	3491.3	0.00471		3491.3	0.02262	3491.3	0.01389		3491.3	0.02851	3491.3	0.01337		2982.34	0.00354	2982.34	0.0023		3491.3	0.00574	3491.3	0.00367		2980.37	0.00882
3489.87	0.00569	3489.87	0.00433		3489.87	0.0051	3489.87	0.00277		3489.87	0.00949	3489.87	0.00515		3489.87	0.02268	3489.87	0.01425		3489.87	0.02955	3489.87	0.01398		2979.48	0.00356	2979.48	0.0034		3489.87	0.00693	3489.87	0.00494		2977.52	0.00832
3488.44	0.00569	3488.44	0.004		3488.44	0.005	3488.44	0.00259		3488.44	0.01008	3488.44	0.00539		3488.44	0.02184	3488.44	0.01411		3488.44	0.03059	3488.44	0.01475		2976.62	0.00328	2976.62	0.00393		3488.44	0.00776	3488.44	0.00569		2974.66	0.00769
3487.01	0.00567	3487.01	0.00372		3487.01	0.00468	3487.01	0.00225		3487.01	0.01009	3487.01	0.00543		3487.01	0.02019	3487.01	0.01351		3487.01	0.03171	3487.01	0.01575		2973.77	0.00285	2973.77	0.00347		3487.01	0.00819	3487.01	0.00596		2971.8	0.00688
3485.58	0.00564	3485.58	0.00359		3485.58	0.00418	3485.58	0.00189		3485.58	0.00955	3485.58	0.00528		3485.58	0.01814	3485.58	0.01269		3485.58	0.03289	3485.58	0.01688		2970.91	0.00262	2970.91	0.00255		3485.58	0.00827	3485.58	0.00584		2968.95	0.00594
3484.15	0.00559	3484.15	0.00363		3484.15	0.00362	3484.15	0.00161		3484.15	0.00859	3484.15	0.00498		3484.15	0.01608	3484.15	0.01185		3484.15	0.034	3484.15	0.01783		2968.05	0.00286	2968.05	0.00202		3484.15	0.00796	3484.15	0.00531		2966.09	0.00507
3482.72	0.00548	3482.72	0.00375		3482.72	0.00321	3482.72	0.00147		3482.72	0.00744	3482.72	0.00457		3482.72	0.01418	3482.72	0.01096		3482.72	0.03476	3482.72	0.01834		2965.19	0.00348	2965.19	0.00234		3482.72	0.00721	3482.72	0.00437		2963.23	0.00456
3481.29	0.00535	3481.29	0.00391		3481.29	0.00314	3481.29	0.00154		3481.29	0.00643	3481.29	0.00415		3481.29	0.01249	3481.29	0.01002		3481.29	0.03502	3481.29	0.01843		2962.33	0.00395	2962.33	0.00316		3481.29	0.00625	3481.29	0.00328		2960.37	0.00461
3479.86	0.00533	3479.86	0.00413		3479.86	0.00342	3479.86	0.00185		3479.86	0.00588	3479.86	0.00387		3479.86	0.01132	3479.86	0.00924		3479.86	0.03502	3479.86	0.01835		2959.47	0.00388	2959.47	0.00375		3479.86	0.00554	3479.86	0.00254		2957.52	0.0051
3478.43	0.00551	3478.43	0.00446		3478.43	0.00394	3478.43	0.00235		3478.43	0.00598	3478.43	0.00387		3478.43	0.01106	3478.43	0.00889		3478.43	0.03517	3478.43	0.01837		2956.61	0.00328	2956.61	0.00349		3478.43	0.0055	3478.43	0.0025		2954.66	0.00574
3477	0.00583	3477	0.00481		3477	0.00454	3477	0.0029		3477	0.0067	3477	0.00417		3477	0.01178	3477	0.00904		3477	0.0358	3477	0.01866		2953.75	0.00276	2953.75	0.00259		3477	0.00616	3477	0.00316		2951.8	0.00626
3475.57	0.00616	3475.57	0.00502		3475.57	0.00506	3475.57	0.00328		3475.57	0.00788	3475.57	0.0047		3475.57	0.01318	3475.57	0.00949		3475.57	0.03694	3475.57	0.01923		2950.89	0.0029	2950.89	0.00192		3475.57	0.0073	3475.57	0.00435		2948.95	0.00665
3474.14	0.00638	3474.14	0.005		3474.14	0.00532	3474.14	0.00331		3474.14	0.00922	3474.14	0.00532		3474.14	0.01492	3474.14	0.01008		3474.14	0.03841	3474.14	0.02005		2948.03	0.00359	2948.03	0.0022		3474.14	0.00859	3474.14	0.00569		2946.09	0.00704
3472.71	0.0064	3472.71	0.00473		3472.71	0.00515	3472.71	0.00297		3472.71	0.01042	3472.71	0.00589		3472.71	0.01672	3472.71	0.01073		3472.71	0.03991	3472.71	0.02097		2945.17	0.00401	2945.17	0.00331		3472.71	0.00966	3472.71	0.00674		2943.23	0.00751
3471.28	0.00622	3471.28	0.00428		3471.28	0.00455	3471.28	0.00237		3471.28	0.01115	3471.28	0.00621		3471.28	0.01834	3471.28	0.01135		3471.28	0.04123	3471.28	0.02182		2942.31	0.00359	2942.31	0.00438		3471.28	0.01029	3471.28	0.0072		2940.37	0.00788
3469.85	0.00591	3469.85	0.00377		3469.85	0.00367	3469.85	0.00167		3469.85	0.01117	3469.85	0.00618		3469.85	0.01961	3469.85	0.01189		3469.85	0.04236	3469.85	0.02261		2939.45	0.00264	2939.45	0.00449		3469.85	0.01043	3469.85	0.00708		2937.52	0.00792
3468.42	0.0056	3468.42	0.00331		3468.42	0.00279	3468.42	0.00099		3468.42	0.01038	3468.42	0.00574		3468.42	0.02047	3468.42	0.01235		3468.42	0.04352	3468.42	0.0235		2936.59	0.00207	2936.59	0.00353		3468.42	0.01032	3468.42	0.00663		2934.66	0.00776
3466.99	0.00543	3466.99	0.00308		3466.99	0.00221	3466.99	0.00063		3466.99	0.00904	3466.99	0.00506		3466.99	0.02093	3466.99	0.01278		3466.99	0.04485	3466.99	0.02459		2933.73	0.0024	2933.73	0.0024		3466.99	0.01025	3466.99	0.00613		2931.8	0.00782
3465.56	0.0054	3465.56	0.00314		3465.56	0.00206	3465.56	0.00071		3465.56	0.00755	3465.56	0.00432		3465.56	0.02101	3465.56	0.01319		3465.56	0.04623	3465.56	0.02576		2930.87	0.00318	2930.87	0.00222		3465.56	0.0103	3465.56	0.00573		2928.95	0.00838
3464.14	0.00546	3464.14	0.00345		3464.14	0.00239	3464.14	0.00117		3464.14	0.00631	3464.14	0.00368		3464.14	0.0207	3464.14	0.01347		3464.14	0.04743	3464.14	0.02675		2928.02	0.00346	2928.02	0.00324		3464.14	0.01034	3464.14	0.00541		2926.09	0.00927
3462.71	0.00557	3462.71	0.0039		3462.71	0.0031	3462.71	0.00177		3462.71	0.00562	3462.71	0.00324		3462.71	0.01992	3462.71	0.01347		3462.71	0.04836	3462.71	0.02741		2925.16	0.00295	2925.16	0.00448		3462.71	0.01027	3462.71	0.00523		2923.23	0.0101
3461.28	0.00576	3461.28	0.00436		3461.28	0.00402	3461.28	0.00229		3461.28	0.00564	3461.28	0.0031		3461.28	0.01867	3461.28	0.01308		3461.28	0.04925	3461.28	0.02782		2922.3	0.00242	2922.3	0.00471		3461.28	0.0103	3461.28	0.00539		2920.37	0.01056
3459.85	0.00611	3459.85	0.00475		3459.85	0.00494	3459.85	0.00263		3459.85	0.00643	3459.85	0.00338		3459.85	0.01719	3459.85	0.01243		3459.85	0.05044	3459.85	0.02834		2919.44	0.00284	2919.44	0.00362		3459.85	0.01078	3459.85	0.00611		2917.52	0.01048
3458.42	0.0066	3458.42	0.00502		3458.42	0.00561	3458.42	0.00276		3458.42	0.00786	3458.42	0.00407		3458.42	0.01583	3458.42	0.01172		3458.42	0.05218	3458.42	0.02938		2916.58	0.00424	2916.58	0.00232		3458.42	0.01194	3458.42	0.00743		2914.66	0.00988
3456.99	0.0071	3456.99	0.00513		3456.99	0.00582	3456.99	0.00269		3456.99	0.0096	3456.99	0.00498		3456.99	0.01474	3456.99	0.01101		3456.99	0.05444	3456.99	0.03101		2913.72	0.00567	2913.72	0.00209		3456.99	0.01364	3456.99	0.0091		2911.8	0.00898
3455.56	0.00743	3455.56	0.00505		3455.56	0.00551	3455.56	0.00239		3455.56	0.0112	3455.56	0.00588		3455.56	0.0139	3455.56	0.01029		3455.56	0.05699	3455.56	0.03303		2910.86	0.00572	2910.86	0.00303		3455.56	0.01555	3455.56	0.01074		2908.94	0.00805
3454.13	0.0075	3454.13	0.00479		3454.13	0.0048	3454.13	0.00194		3454.13	0.01231	3454.13	0.00655		3454.13	0.01335	3454.13	0.00961		3454.13	0.05955	3454.13	0.03514		2908	0.00424	2908	0.004		3454.13	0.01732	3454.13	0.01204		2906.09	0.0073
3452.7	0.00733	3452.7	0.0044		3452.7	0.00395	3452.7	0.00149		3452.7	0.01274	3452.7	0.00686		3452.7	0.01315	3452.7	0.00908		3452.7	0.06188	3452.7	0.03713		2905.14	0.0022	2905.14	0.00381		3452.7	0.01873	3452.7	0.01286		2903.23	0.00675
3451.27	0.00699	3451.27	0.00395		3451.27	0.00322	3451.27	0.00114		3451.27	0.01241	3451.27	0.00671		3451.27	0.01335	3451.27	0.0088		3451.27	0.06382	3451.27	0.03884		2902.28	0.00114	2902.28	0.0025		3451.27	0.01955	3451.27	0.01314		2900.37	0.00643
3449.84	0.00658	3449.84	0.00355		3449.84	0.00283	3449.84	0.00098		3449.84	0.01137	3449.84	0.0061		3449.84	0.01402	3449.84	0.00885		3449.84	0.06543	3449.84	0.04015		2899.42	0.00197	2899.42	0.00136		3449.84	0.01953	3449.84	0.01279		2897.52	0.0064
3448.41	0.00623	3448.41	0.00331		3448.41	0.003	3448.41	0.00111		3448.41	0.00986	3448.41	0.00518		3448.41	0.01523	3448.41	0.00928		3448.41	0.067	3448.41	0.04118		2896.56	0.00403	2896.56	0.00141		3448.41	0.01884	3448.41	0.01199		2894.66	0.00657
3446.98	0.00603	3446.98	0.00331		3446.98	0.00383	3446.98	0.00161		3446.98	0.00837	3446.98	0.00428		3446.98	0.01677	3446.98	0.01006		3446.98	0.06893	3446.98	0.04226		2893.7	0.00537	2893.7	0.00238		3446.98	0.01813	3446.98	0.01126		2891.8	0.00672
3445.55	0.00609	3445.55	0.00358		3445.55	0.00504	3445.55	0.00234		3445.55	0.00746	3445.55	0.00373		3445.55	0.01843	3445.55	0.01113		3445.55	0.0714	3445.55	0.04365		2890.84	0.00471	2890.84	0.00308		3445.55	0.01796	3445.55	0.01111		2888.94	0.0067
3444.12	0.00648	3444.12	0.00403		3444.12	0.00611	3444.12	0.00293		3444.12	0.00745	3444.12	0.00365		3444.12	0.02019	3444.12	0.01243		3444.12	0.07426	3444.12	0.04532		2887.98	0.00295	2887.98	0.00278		3444.12	0.01831	3444.12	0.01156		2886.09	0.00655
3442.69	0.0071	3442.69	0.00453		3442.69	0.00671	3442.69	0.00312		3442.69	0.00831	3442.69	0.004		3442.69	0.0218	3442.69	0.0137		3442.69	0.07721	3442.69	0.04718		2885.12	0.00217	2885.12	0.00192		3442.69	0.01896	3442.69	0.0124		2883.23	0.00639
3441.26	0.00772	3441.26	0.00491		3441.26	0.00677	3441.26	0.00286		3441.26	0.00973	3441.26	0.0046		3441.26	0.02275	3441.26	0.01453		3441.26	0.08009	3441.26	0.04916		2882.26	0.00336	2882.26	0.00152		3441.26	0.01983	3441.26	0.01342		2880.37	0.00623
3439.83	0.00812	3439.83	0.00501		3439.83	0.0063	3439.83	0.00221		3439.83	0.01128	3439.83	0.00529		3439.83	0.02279	3439.83	0.01473		3439.83	0.08285	3439.83	0.05117		2879.41	0.00535	2879.41	0.00201		3439.83	0.02093	3439.83	0.01444		2877.52	0.00595
3438.4	0.00825	3438.4	0.00483		3438.4	0.00541	3438.4	0.00131		3438.4	0.01258	3438.4	0.00589		3438.4	0.02209	3438.4	0.01441		3438.4	0.08564	3438.4	0.05316		2876.55	0.00599	2876.55	0.00281		3438.4	0.02224	3438.4	0.01532		2874.66	0.00554
3436.97	0.00818	3436.97	0.00449		3436.97	0.00439	3436.97	0.00048		3436.97	0.01339	3436.97	0.00629		3436.97	0.02086	3436.97	0.01371		3436.97	0.08876	3436.97	0.0553		2873.69	0.00459	2873.69	0.00304		3436.97	0.02377	3436.97	0.01616		2871.8	0.0052
3435.54	0.00805	3435.54	0.00414		3435.54	0.00363	3435.54	5e-05		3435.54	0.01358	3435.54	0.0064		3435.54	0.01932	3435.54	0.01277		3435.54	0.09241	3435.54	0.05781		2870.83	0.00257	2870.83	0.00255		3435.54	0.02549	3435.54	0.01703		2868.94	0.00518
3434.11	0.00792	3434.11	0.0039		3434.11	0.00343	3434.11	0.00015		3434.11	0.01304	3434.11	0.00616		3434.11	0.0177	3434.11	0.01171		3434.11	0.09654	3434.11	0.06065		2867.97	0.00183	2867.97	0.00199		3434.11	0.02712	3434.11	0.01786		2866.09	0.00543
3432.68	0.00773	3432.68	0.00375		3432.68	0.00383	3432.68	0.00064		3432.68	0.01188	3432.68	0.0056		3432.68	0.01618	3432.68	0.0106		3432.68	0.10092	3432.68	0.06362		2865.11	0.00296	2865.11	0.00196		3432.68	0.02833	3432.68	0.01848		2863.23	0.00571
3431.25	0.00746	3431.25	0.00366		3431.25	0.00471	3431.25	0.00133		3431.25	0.01047	3431.25	0.00492		3431.25	0.01487	3431.25	0.00952		3431.25	0.10528	3431.25	0.06652		2862.25	0.00474	2862.25	0.00249		3431.25	0.02905	3431.25	0.01893		2860.37	0.00588
3429.82	0.00724	3429.82	0.00369		3429.82	0.00588	3429.82	0.00207		3429.82	0.0093	3429.82	0.00441		3429.82	0.01399	3429.82	0.00866		3429.82	0.10965	3429.82	0.0694		2859.39	0.00533	2859.39	0.00292		3429.82	0.02959	3429.82	0.01951		2857.52	0.00603
3428.39	0.00728	3428.39	0.00394		3428.39	0.00718	3428.39	0.00276		3428.39	0.00874	3428.39	0.00427		3428.39	0.01378	3428.39	0.00831		3428.39	0.11428	3428.39	0.07253		2856.53	0.00419	2856.53	0.00267		3428.39	0.03033	3428.39	0.0205		2854.66	0.00631
3426.96	0.00765	3426.96	0.0044		3426.96	0.00833	3426.96	0.00326		3426.96	0.00891	3426.96	0.00451		3426.96	0.01433	3426.96	0.00853		3426.96	0.1194	3426.96	0.07611		2853.67	0.0024	2853.67	0.002		3426.96	0.0315	3426.96	0.02197		2851.8	0.00666
3425.53	0.00828	3425.53	0.00492		3425.53	0.00899	3425.53	0.00345		3425.53	0.00975	3425.53	0.00502		3425.53	0.01537	3425.53	0.00917		3425.53	0.12493	3425.53	0.08004		2850.81	0.00169	2850.81	0.00166		3425.53	0.03313	3425.53	0.02375		2848.94	0.00679
3424.1	0.009	3424.1	0.00534		3424.1	0.0089	3424.1	0.00325		3424.1	0.01108	3424.1	0.00567		3424.1	0.01663	3424.1	0.00996		3424.1	0.13056	3424.1	0.08403		2847.95	0.00268	2847.95	0.00207		3424.1	0.03512	3424.1	0.02562		2846.09	0.00654
3422.67	0.00967	3422.67	0.00558		3422.67	0.00812	3422.67	0.00277		3422.67	0.01263	3422.67	0.00634		3422.67	0.01799	3422.67	0.01079		3422.67	0.13615	3422.67	0.08793		2845.09	0.00425	2845.09	0.00276		3422.67	0.03744	3422.67	0.02751		2843.23	0.00598
3421.24	0.01024	3421.24	0.00566		3421.24	0.00706	3421.24	0.00226		3421.24	0.0141	3421.24	0.00696		3421.24	0.01951	3421.24	0.01173		3421.24	0.14191	3421.24	0.09194		2842.23	0.00461	2842.23	0.0029		3421.24	0.04025	3421.24	0.0296		2840.37	0.00539
3419.81	0.01071	3419.81	0.00567		3419.81	0.00625	3419.81	0.00199		3419.81	0.01525	3419.81	0.00746		3419.81	0.02114	3419.81	0.01283		3419.81	0.14813	3419.81	0.09635		2839.37	0.0033	2839.37	0.00222		3419.81	0.04357	3419.81	0.03203		2837.51	0.00494
3418.39	0.01102	3418.39	0.0056		3418.39	0.00598	3418.39	0.002		3418.39	0.01581	3418.39	0.00772		3418.39	0.02278	3418.39	0.01399		3418.39	0.1547	3418.39	0.10093		2836.51	0.00158	2836.51	0.00133		3418.39	0.047	3418.39	0.0345		2834.66	0.00464
3416.96	0.01104	3416.96	0.0054		3416.96	0.00619	3416.96	0.00218		3416.96	0.01557	3416.96	0.00755		3416.96	0.02412	3416.96	0.01492		3416.96	0.16101	3416.96	0.10511		2833.66	0.00112	2833.66	0.00112		3416.96	0.04985	3416.96	0.03644		2831.8	0.00442
3415.53	0.0107	3415.53	0.00501		3415.53	0.00671	3415.53	0.00239		3415.53	0.01449	3415.53	0.0069		3415.53	0.02475	3415.53	0.01531		3415.53	0.1666	3415.53	0.10858		2830.8	0.00234	2830.8	0.00181		3415.53	0.05169	3415.53	0.03759		2828.94	0.00428
3414.1	0.0101	3414.1	0.00454		3414.1	0.00746	3414.1	0.00267		3414.1	0.01288	3414.1	0.00597		3414.1	0.02453	3414.1	0.01505		3414.1	0.17163	3414.1	0.11162		2827.94	0.00398	2827.94	0.0027		3414.1	0.05265	3414.1	0.03826		2826.09	0.00427
3412.67	0.00951	3412.67	0.0042		3412.67	0.00834	3412.67	0.00299		3412.67	0.0113	3412.67	0.00507		3412.67	0.02368	3412.67	0.01437		3412.67	0.17661	3412.67	0.11478		2825.08	0.00427	2825.08	0.00289		3412.67	0.05323	3412.67	0.03899		2823.23	0.00437
3411.24	0.00915	3411.24	0.00408		3411.24	0.00919	3411.24	0.00326		3411.24	0.01034	3411.24	0.00453		3411.24	0.02249	3411.24	0.01343		3411.24	0.18197	3411.24	0.11837		2822.22	0.00288	2822.22	0.00216		3411.24	0.05394	3411.24	0.04015		2820.37	0.0045
3409.81	0.0091	3409.81	0.00416		3409.81	0.00977	3409.81	0.00334		3409.81	0.01035	3409.81	0.00445		3409.81	0.02108	3409.81	0.01232		3409.81	0.18778	3409.81	0.12239		2819.36	0.00132	2819.36	0.00119		3409.81	0.05505	3409.81	0.04184		2817.51	0.00458
3408.38	0.00939	3408.38	0.00439		3408.38	0.00986	3408.38	0.00314		3408.38	0.01128	3408.38	0.00483		3408.38	0.01956	3408.38	0.01114		3408.38	0.19399	3408.38	0.12666		2816.5	0.00135	2816.5	0.00092		3408.38	0.05671	3408.38	0.044		2814.66	0.00462
3406.95	0.00996	3406.95	0.00468		3406.95	0.00942	3406.95	0.00271		3406.95	0.01278	3406.95	0.0055		3406.95	0.01808	3406.95	0.01002		3406.95	0.20051	3406.95	0.13107		2813.64	0.00303	2813.64	0.00167		3406.95	0.05911	3406.95	0.04654		2811.8	0.00468
3405.52	0.01066	3405.52	0.00491		3405.52	0.00858	3405.52	0.00216		3405.52	0.01439	3405.52	0.00623		3405.52	0.01677	3405.52	0.00904		3405.52	0.20701	3405.52	0.13534		2810.78	0.00465	2810.78	0.00274		3405.52	0.06229	3405.52	0.04927		2808.94	0.00467
3404.09	0.0113	3404.09	0.00494		3404.09	0.00763	3404.09	0.00167		3404.09	0.01574	3404.09	0.00682		3404.09	0.01574	3404.09	0.00829		3404.09	0.21303	3404.09	0.13914		2807.92	0.00476	2807.92	0.00316		3404.09	0.06608	3404.09	0.05199		2806.09	0.00452
3402.66	0.01174	3402.66	0.00479		3402.66	0.00687	3402.66	0.00135		3402.66	0.01657	3402.66	0.0071		3402.66	0.0151	3402.66	0.00788		3402.66	0.21839	3402.66	0.14235		2805.06	0.0034	2805.06	0.00251		3402.66	0.07018	3402.66	0.05466		2803.23	0.00431
3401.23	0.01199	3401.23	0.0046		3401.23	0.00687	3401.23	0.00155		3401.23	0.01697	3401.23	0.00726		3401.23	0.01521	3401.23	0.00805		3401.23	0.22352	3401.23	0.14539		2802.2	0.00198	2802.2	0.00144		3401.23	0.07443	3401.23	0.05755		2800.37	0.00425
3399.8	0.01224	3399.8	0.00462		3399.8	0.00836	3399.8	0.00283		3399.8	0.0174	3399.8	0.00779		3399.8	0.01669	3399.8	0.00915		3399.8	0.2291	3399.8	0.14886		2799.34	0.00185	2799.34	0.00097		3399.8	0.07882	3399.8	0.06108		2797.51	0.00443
3398.37	0.01221	3398.37	0.00456		3398.37	0.00989	3398.37	0.00377		3398.37	0.01685	3398.37	0.00767		3398.37	0.0186	3398.37	0.01038		3398.37	0.23483	3398.37	0.15249		2796.48	0.00324	2796.48	0.00168		3398.37	0.08245	3398.37	0.06438		2794.66	0.00473
3396.94	0.01198	3396.94	0.00447		3396.94	0.01133	3396.94	0.00437		3396.94	0.01578	3396.94	0.00714		3396.94	0.02071	3396.94	0.01158		3396.94	0.24036	3396.94	0.15611		2793.62	0.00486	2793.62	0.00289		3396.94	0.08527	3396.94	0.0673		2791.8	0.00497
3395.51	0.01162	3395.51	0.00441		3395.51	0.01252	3395.51	0.00474		3395.51	0.01477	3395.51	0.00659		3395.51	0.02284	3395.51	0.0127		3395.51	0.24519	3395.51	0.15938		2790.76	0.00526	2790.76	0.00339		3395.51	0.08741	3395.51	0.06967		2788.94	0.00513
3394.08	0.01126	3394.08	0.00433		3394.08	0.01302	3394.08	0.00472		3394.08	0.01412	3394.08	0.00619		3394.08	0.02474	3394.08	0.01361		3394.08	0.24911	3394.08	0.16212		2787.91	0.00423	2787.91	0.00266		3394.08	0.08905	3394.08	0.07151		2786.09	0.00528
3392.65	0.01102	3392.65	0.00428		3392.65	0.01267	3392.65	0.00422		3392.65	0.01397	3392.65	0.00604		3392.65	0.0261	3392.65	0.01423		3392.65	0.25257	3392.65	0.16463		2785.05	0.00303	2785.05	0.00142		3392.65	0.09077	3392.65	0.07325		2783.23	0.00541
3391.22	0.01108	3391.22	0.00437		3391.22	0.01171	3391.22	0.00339		3391.22	0.01437	3391.22	0.00618		3391.22	0.02678	3391.22	0.01453		3391.22	0.25631	3391.22	0.16735		2782.19	0.0031	2782.19	0.00103		3391.22	0.09324	3391.22	0.07551		2780.37	0.00551
3389.79	0.01153	3389.79	0.00469		3389.79	0.01063	3389.79	0.00261		3389.79	0.01526	3389.79	0.00661		3389.79	0.02692	3389.79	0.01458		3389.79	0.26071	3389.79	0.17042		2779.33	0.00449	2779.33	0.00204		3389.79	0.09679	3389.79	0.07859		2777.51	0.00558
3388.36	0.01231	3388.36	0.00518		3388.36	0.00989	3388.36	0.00224		3388.36	0.01651	3388.36	0.00725		3388.36	0.02674	3388.36	0.01446		3388.36	0.26562	3388.36	0.17365		2776.47	0.00569	2776.47	0.00361		3388.36	0.10127	3388.36	0.08238		2774.66	0.00564
3386.93	0.01329	3386.93	0.00567		3386.93	0.00975	3386.93	0.00244		3386.93	0.01783	3386.93	0.00796		3386.93	0.02618	3386.93	0.01411		3386.93	0.2705	3386.93	0.17669		2773.61	0.00538	2773.61	0.00428		3386.93	0.10631	3386.93	0.08657		2771.8	0.00564
3385.5	0.01427	3385.5	0.00599		3385.5	0.01018	3385.5	0.00303		3385.5	0.01883	3385.5	0.0085		3385.5	0.02509	3385.5	0.01344		3385.5	0.27475	3385.5	0.17924		2770.75	0.00385	2770.75	0.00344		3385.5	0.11142	3385.5	0.09071		2768.94	0.00545
3384.07	0.01504	3384.07	0.00608		3384.07	0.01103	3384.07	0.00375		3384.07	0.01926	3384.07	0.00874		3384.07	0.02348	3384.07	0.01247		3384.07	0.27797	3384.07	0.18114		2767.89	0.0026	2767.89	0.00205		3384.07	0.1161	3384.07	0.09437		2766.08	0.00505
3382.64	0.0155	3382.64	0.00601		3382.64	0.01211	3382.64	0.00447		3382.64	0.0191	3382.64	0.00863		3382.64	0.02158	3382.64	0.01138		3382.64	0.28011	3382.64	0.18244		2765.03	0.00278	2765.03	0.00165		3382.64	0.11984	3382.64	0.09729		2763.23	0.00462
3381.21	0.0156	3381.21	0.00592		3381.21	0.01328	3381.21	0.0051		3381.21	0.01847	3381.21	0.00825		3381.21	0.01981	3381.21	0.0104		3381.21	0.28152	3381.21	0.18333		2762.17	0.00408	2762.17	0.00273		3381.21	0.12237	3381.21	0.09945		2760.37	0.00449
3379.78	0.01543	3379.78	0.00589		3379.78	0.01432	3379.78	0.00557		3379.78	0.01761	3379.78	0.00774		3379.78	0.01854	3379.78	0.00979		3379.78	0.28269	3379.78	0.1841		2759.31	0.00524	2759.31	0.00423		3379.78	0.12384	3379.78	0.10103		2757.51	0.00482
3378.35	0.01514	3378.35	0.00591		3378.35	0.01499	3378.35	0.00577		3378.35	0.01679	3378.35	0.00729		3378.35	0.018	3378.35	0.00967		3378.35	0.28388	3378.35	0.18495		2756.45	0.00515	2756.45	0.00468		3378.35	0.12463	3378.35	0.10224		2754.66	0.00546
3376.92	0.01488	3376.92	0.00597		3376.92	0.01502	3376.92	0.00561		3376.92	0.01628	3376.92	0.00708		3376.92	0.0183	3376.92	0.00999		3376.92	0.2851	3376.92	0.18593		2753.59	0.00391	2753.59	0.00364		3376.92	0.12519	3376.92	0.10328		2751.8	0.00614
3375.49	0.01473	3375.49	0.00607		3375.49	0.01434	3375.49	0.00508		3375.49	0.01627	3375.49	0.00718		3375.49	0.01939	3375.49	0.01064		3375.49	0.28616	3375.49	0.18692		2750.73	0.00282	2750.73	0.00224		3375.49	0.12587	3375.49	0.1043		2748.94	0.00667
3374.06	0.01469	3374.06	0.00616		3374.06	0.01317	3374.06	0.00431		3374.06	0.01678	3374.06	0.00748		3374.06	0.0211	3374.06	0.01146		3374.06	0.28677	3374.06	0.18762		2747.87	0.00294	2747.87	0.00194		3374.06	0.1268	3374.06	0.10532		2746.08	0.00696
3372.64	0.01474	3372.64	0.0062		3372.64	0.01193	3372.64	0.0035		3372.64	0.01763	3372.64	0.00781		3372.64	0.02313	3372.64	0.01229		3372.64	0.28664	3372.64	0.1877		2745.01	0.00387	2745.01	0.00286		3372.64	0.12798	3372.64	0.10627		2743.23	0.00699
3371.21	0.01493	3371.21	0.00617		3371.21	0.01109	3371.21	0.00291		3371.21	0.0186	3371.21	0.00809		3371.21	0.02514	3371.21	0.01302		3371.21	0.28587	3371.21	0.18713		2742.15	0.00459	2742.15	0.00401		3371.21	0.12942	3371.21	0.10718		2740.37	0.00677
3369.78	0.01537	3369.78	0.00616		3369.78	0.01104	3369.78	0.00279		3369.78	0.01949	3369.78	0.00835		3369.78	0.02691	3369.78	0.01364		3369.78	0.28506	3369.78	0.18629		2739.3	0.00433	2739.3	0.00414		3369.78	0.13131	3369.78	0.10831		2737.51	0.00638
3368.35	0.0161	3368.35	0.00621		3368.35	0.01192	3368.35	0.00327		3368.35	0.02022	3368.35	0.00864		3368.35	0.02834	3368.35	0.01418		3368.35	0.28493	3368.35	0.1857		2736.44	0.0033	2736.44	0.00315		3368.35	0.1338	3368.35	0.10989		2734.66	0.00593
3366.92	0.017	3366.92	0.00633		3366.92	0.01355	3366.92	0.00428		3366.92	0.02078	3366.92	0.00898		3366.92	0.02936	3366.92	0.01465		3366.92	0.28575	3366.92	0.18569		2733.58	0.00247	2733.58	0.00216		3366.92	0.13672	3366.92	0.11196		2731.8	0.00547
3365.49	0.01786	3365.49	0.00651		3365.49	0.01546	3365.49	0.00549		3365.49	0.0211	3365.49	0.00935		3365.49	0.02987	3365.49	0.01498		3365.49	0.2872	3365.49	0.18626		2730.72	0.00257	2730.72	0.00219		3365.49	0.13953	3365.49	0.11424		2728.94	0.00504
3364.06	0.01846	3364.06	0.00674		3364.06	0.01705	3364.06	0.00652		3364.06	0.02112	3364.06	0.00963		3364.06	0.02981	3364.06	0.01507		3364.06	0.28855	3364.06	0.18707		2727.86	0.00341	2727.86	0.00306		3364.06	0.14154	3364.06	0.11614		2726.08	0.0047
3362.63	0.01869	3362.63	0.00694		3362.63	0.01786	3362.63	0.0071		3362.63	0.02082	3362.63	0.00969		3362.63	0.02909	3362.63	0.01476		3362.63	0.28916	3362.63	0.18764		2725	0.00436	2725	0.00376		3362.63	0.14231	3362.63	0.11713		2723.23	0.00454
3361.2	0.01865	3361.2	0.0071		3361.2	0.01779	3361.2	0.00719		3361.2	0.02042	3361.2	0.0096		3361.2	0.02773	3361.2	0.01406		3361.2	0.28906	3361.2	0.18784		2722.14	0.00467	2722.14	0.00357		3361.2	0.14201	3361.2	0.11723		2720.37	0.00462
3359.77	0.01853	3359.77	0.00727		3359.77	0.01715	3359.77	0.00694		3359.77	0.0203	3359.77	0.00961		3359.77	0.02606	3359.77	0.01324		3359.77	0.28885	3359.77	0.18803		2719.28	0.00409	2719.28	0.00278		3359.77	0.14129	3359.77	0.11698		2717.51	0.00487
3358.34	0.01853	3358.34	0.00757		3358.34	0.01641	3358.34	0.00658		3358.34	0.02077	3358.34	0.00999		3358.34	0.02457	3358.34	0.01263		3358.34	0.289	3358.34	0.18855		2716.42	0.0032	2716.42	0.00229		3358.34	0.14075	3358.34	0.11688		2714.66	0.0051
3356.91	0.01869	3356.91	0.008		3356.91	0.01591	3356.91	0.00623		3356.91	0.02178	3356.91	0.01068		3356.91	0.02356	3356.91	0.0124		3356.91	0.28936	3356.91	0.18924		2713.56	0.00281	2713.56	0.00252		3356.91	0.14059	3356.91	0.11702		2711.8	0.00514
3355.48	0.01897	3355.48	0.00845		3355.48	0.01575	3355.48	0.006		3355.48	0.02301	3355.48	0.01142		3355.48	0.02303	3355.48	0.0124		3355.48	0.28934	3355.48	0.18956		2710.7	0.00322	2710.7	0.00314		3355.48	0.14082	3355.48	0.11726		2708.94	0.00503
3354.05	0.0194	3354.05	0.0088		3354.05	0.01605	3354.05	0.00605		3354.05	0.02424	3354.05	0.01206		3354.05	0.02305	3354.05	0.01255		3354.05	0.28861	3354.05	0.1891		2707.84	0.00391	2707.84	0.00353		3354.05	0.14147	3354.05	0.11759		2706.08	0.0049
3352.62	0.02009	3352.62	0.00907		3352.62	0.01696	3352.62	0.00657		3352.62	0.02547	3352.62	0.01273		3352.62	0.02378	3352.62	0.01293		3352.62	0.28738	3352.62	0.18802		2704.98	0.0042	2704.98	0.0034		3352.62	0.14259	3352.62	0.11819		2703.23	0.00479
3351.19	0.0212	3351.19	0.00937		3351.19	0.01863	3351.19	0.00767		3351.19	0.02683	3351.19	0.01366		3351.19	0.02538	3351.19	0.01373		3351.19	0.28635	3351.19	0.18701		2702.12	0.00379	2702.12	0.00305		3351.19	0.14421	3351.19	0.11935		2700.37	0.00464
3349.76	0.02277	3349.76	0.00988		3349.76	0.02093	3349.76	0.00929		3349.76	0.0283	3349.76	0.01492		3349.76	0.02791	3349.76	0.01508		3349.76	0.28626	3349.76	0.18676		2699.26	0.00326	2699.26	0.00306		3349.76	0.14633	3349.76	0.12122		2697.51	0.00455
3348.33	0.02468	3348.33	0.01067		3348.33	0.02345	3348.33	0.01119		3348.33	0.02982	3348.33	0.01636		3348.33	0.03119	3348.33	0.01692		3348.33	0.2873	3348.33	0.18742		2696.4	0.00338	2696.4	0.00342		3348.33	0.14871	3348.33	0.12358		2694.65	0.00471
3346.9	0.02668	3346.9	0.01171		3346.9	0.02566	3346.9	0.01299		3346.9	0.03127	3346.9	0.01779		3346.9	0.03482	3346.9	0.019		3346.9	0.28882	3346.9	0.18845		2693.55	0.00417	2693.55	0.00371		3346.9	0.15075	3346.9	0.12578		2691.8	0.00513
3345.47	0.02853	3345.47	0.01292		3345.47	0.02722	3345.47	0.01437		3345.47	0.03264	3345.47	0.01911		3345.47	0.03832	3345.47	0.02102		3345.47	0.28993	3345.47	0.18924		2690.69	0.00496	2690.69	0.00366		3345.47	0.15193	3345.47	0.12722		2688.94	0.00565
3344.04	0.03027	3344.04	0.01431		3344.04	0.02826	3344.04	0.01535		3344.04	0.03417	3344.04	0.02046		3344.04	0.04137	3344.04	0.02281		3344.04	0.29028	3344.04	0.18974		2687.83	0.00496	2687.83	0.00335		3344.04	0.15235	3344.04	0.12788		2686.08	0.00606
3342.61	0.03205	3342.61	0.01593		3342.61	0.02926	3342.61	0.01622		3342.61	0.03618	3342.61	0.0221		3342.61	0.04395	3342.61	0.0244		3342.61	0.29032	3342.61	0.19037		2684.97	0.00419	2684.97	0.00317		3342.61	0.15267	3342.61	0.12838		2683.23	0.00633
3341.18	0.03404	3341.18	0.01779		3341.18	0.03066	3341.18	0.01733		3341.18	0.03885	3341.18	0.02415		3341.18	0.04611	3341.18	0.02586		3341.18	0.29061	3341.18	0.19144		2682.11	0.00344	2682.11	0.00336		3341.18	0.15358	3341.18	0.12942		2680.37	0.0065
3339.75	0.03637	3339.75	0.01986		3339.75	0.03268	3339.75	0.01893		3339.75	0.04214	3339.75	0.02657		3339.75	0.04793	3339.75	0.02725		3339.75	0.29151	3339.75	0.19293		2679.25	0.00324	2679.25	0.00363		3339.75	0.15558	3339.75	0.13148		2677.51	0.00654
3338.32	0.03919	3338.32	0.02215		3338.32	0.03555	3338.32	0.02123		3338.32	0.04604	3338.32	0.02942		3338.32	0.04959	3338.32	0.02873		3338.32	0.29343	3338.32	0.19492		2676.39	0.00362	2676.39	0.00357		3338.32	0.15926	3338.32	0.13497		2674.65	0.00637
3336.89	0.04278	3336.89	0.02474		3336.89	0.03961	3336.89	0.02445		3336.89	0.05066	3336.89	0.0329		3336.89	0.05139	3336.89	0.0305		3336.89	0.29696	3336.89	0.19776		2673.53	0.00434	2673.53	0.00307		3336.89	0.16514	3336.89	0.14025		2671.8	0.00603
3335.46	0.04732	3335.46	0.02769		3335.46	0.04501	3335.46	0.02869		3335.46	0.05601	3335.46	0.03711		3335.46	0.05361	3335.46	0.0327		3335.46	0.30232	3335.46	0.20166		2670.67	0.00498	2670.67	0.00252		3335.46	0.17313	3335.46	0.14728		2668.94	0.00565
3334.03	0.05278	3334.03	0.03104		3334.03	0.0514	3334.03	0.03371		3334.03	0.06187	3334.03	0.04187		3334.03	0.0564	3334.03	0.03535		3334.03	0.30892	3334.03	0.2063		2667.81	0.00501	2667.81	0.00248		3334.03	0.18226	3334.03	0.15545		2666.08	0.00531
3332.6	0.05902	3332.6	0.03479		3332.6	0.05815	3332.6	0.03911		3332.6	0.06798	3332.6	0.04691		3332.6	0.05991	3332.6	0.03841		3332.6	0.31581	3332.6	0.21117		2664.95	0.00432	2664.95	0.00306		3332.6	0.19148	3332.6	0.16402		2663.23	0.00494
3331.17	0.06588	3331.17	0.03899		3331.17	0.06476	3331.17	0.04457		3331.17	0.07425	3331.17	0.05211		3331.17	0.06421	3331.17	0.04185		3331.17	0.32262	3331.17	0.21607		2662.09	0.00347	2662.09	0.00362		3331.17	0.20031	3331.17	0.17256		2660.37	0.00455
3329.74	0.07322	3329.74	0.04364		3329.74	0.071	3329.74	0.04986		3329.74	0.08064	3329.74	0.05739		3329.74	0.06924	3329.74	0.04555		3329.74	0.3295	3329.74	0.22115		2659.23	0.00325	2659.23	0.00346		3329.74	0.20885	3329.74	0.18096		2657.51	0.00427
3328.31	0.08073	3328.31	0.0486		3328.31	0.07662	3328.31	0.05466		3328.31	0.08692	3328.31	0.06244		3328.31	0.07475	3328.31	0.04934		3328.31	0.33681	3328.31	0.22674		2656.37	0.00375	2656.37	0.00258		3328.31	0.21747	3328.31	0.18933		2654.65	0.00418
3326.89	0.08777	3326.89	0.05348		3326.89	0.08136	3326.89	0.05867		3326.89	0.09269	3326.89	0.06684		3326.89	0.08042	3326.89	0.05303		3326.89	0.34502	3326.89	0.23328		2653.51	0.00423	2653.51	0.00174		3326.89	0.22686	3326.89	0.19819		2651.8	0.00428
3325.46	0.0935	3325.46	0.05771		3325.46	0.08501	3325.46	0.06169		3325.46	0.09753	3325.46	0.07025		3325.46	0.08593	3325.46	0.05648		3325.46	0.35494	3325.46	0.2413		2650.65	0.004	2650.65	0.00168		3325.46	0.23805	3325.46	0.20862		2648.94	0.0045
3324.03	0.09717	3324.03	0.0607		3324.03	0.08755	3324.03	0.06371		3324.03	0.10113	3324.03	0.07261		3324.03	0.09098	3324.03	0.05957		3324.03	0.36737	3324.03	0.25123		2647.79	0.00317	2647.79	0.00242		3324.03	0.25199	3324.03	0.22166		2646.08	0.00479
3322.6	0.09857	3322.6	0.0621		3322.6	0.08916	3322.6	0.06489		3322.6	0.10336	3322.6	0.07409		3322.6	0.09531	3322.6	0.06217		3322.6	0.38262	3322.6	0.26305		2644.94	0.0023	2644.94	0.00325		3322.6	0.26904	3322.6	0.23776		2643.23	0.00511
3321.17	0.09811	3321.17	0.06207		3321.17	0.09021	3321.17	0.06551		3321.17	0.10448	3321.17	0.07498		3321.17	0.09883	3321.17	0.06425		3321.17	0.40042	3321.17	0.27639		2642.08	0.00195	2642.08	0.00324		3321.17	0.28904	3321.17	0.25676		2640.37	0.00535
3319.74	0.09671	3319.74	0.06118		3319.74	0.09124	3319.74	0.06603		3319.74	0.10526	3319.74	0.07578		3319.74	0.10169	3319.74	0.06593		3319.74	0.42044	3319.74	0.29093		2639.22	0.00238	2639.22	0.00233		3319.74	0.3118	3319.74	0.2783		2637.51	0.00539
3318.31	0.09548	3318.31	0.06015		3318.31	0.09274	3318.31	0.06699		3318.31	0.10659	3318.31	0.07703		3318.31	0.10423	3318.31	0.06748		3318.31	0.44257	3318.31	0.30668		2636.36	0.00312	2636.36	0.00133		3318.31	0.33729	3318.31	0.3022		2634.65	0.00529
3316.88	0.09532	3316.88	0.05961		3316.88	0.09505	3316.88	0.06875		3316.88	0.10908	3316.88	0.07912		3316.88	0.10687	3316.88	0.06924		3316.88	0.46686	3316.88	0.32382		2633.5	0.00353	2633.5	0.0014		3316.88	0.36536	3316.88	0.32835		2631.8	0.00515
3315.45	0.09677	3315.45	0.06		3315.45	0.09837	3315.45	0.07146		3315.45	0.11289	3315.45	0.08217		3315.45	0.11	3315.45	0.07153		3315.45	0.49349	3315.45	0.34247		2630.64	0.00321	2630.64	0.0026		3315.45	0.39579	3315.45	0.35671		2628.94	0.00509
3314.02	0.09997	3314.02	0.06154		3314.02	0.1028	3314.02	0.0751		3314.02	0.11799	3314.02	0.08619		3314.02	0.11391	3314.02	0.07455		3314.02	0.52255	3314.02	0.36269		2627.78	0.00258	2627.78	0.00375		3314.02	0.42856	3314.02	0.38742		2626.08	0.00521
3312.59	0.10481	3312.59	0.06432		3312.59	0.10832	3312.59	0.07958		3312.59	0.12443	3312.59	0.09114		3312.59	0.11878	3312.59	0.07838		3312.59	0.55381	3312.59	0.38438		2624.92	0.00255	2624.92	0.0036		3312.59	0.46393	3312.59	0.42056		2623.22	0.00552
3311.16	0.11113	3311.16	0.06833		3311.16	0.11488	3311.16	0.08487		3311.16	0.13227	3311.16	0.09696		3311.16	0.12482	3311.16	0.08314		3311.16	0.58682	3311.16	0.4074		2622.06	0.00336	2622.06	0.00229		3311.16	0.50223	3311.16	0.45613		2620.37	0.00591
3309.73	0.11877	3309.73	0.07348		3309.73	0.12261	3309.73	0.09108		3309.73	0.1415	3309.73	0.10368		3309.73	0.13232	3309.73	0.08897		3309.73	0.62173	3309.73	0.43201		2619.2	0.00429	2619.2	0.00121		3309.73	0.54402	3309.73	0.49444		2617.51	0.00621
3308.3	0.12763	3308.3	0.07963		3308.3	0.13182	3308.3	0.09845		3308.3	0.15206	3308.3	0.11134		3308.3	0.14149	3308.3	0.09593		3308.3	0.65954	3308.3	0.45887		2616.34	0.00438	2616.34	0.00153		3308.3	0.58988	3308.3	0.53622		2614.65	0.00633
3306.87	0.13761	3306.87	0.08661		3306.87	0.14281	3306.87	0.10716		3306.87	0.16392	3306.87	0.12005		3306.87	0.15246	3306.87	0.10399		3306.87	0.70147	3306.87	0.48852		2613.48	0.00352	2613.48	0.00297		3306.87	0.63985	3306.87	0.58214		2611.8	0.00633
3305.44	0.14864	3305.44	0.09429		3305.44	0.15576	3305.44	0.1173		3305.44	0.17724	3305.44	0.1299		3305.44	0.16523	3305.44	0.11313		3305.44	0.74863	3305.44	0.52122		2610.62	0.00265	2610.62	0.0041		3305.44	0.69403	3305.44	0.63278		2608.94	0.00631
3304.01	0.16084	3304.01	0.1026		3304.01	0.17063	3304.01	0.12882		3304.01	0.19211	3304.01	0.14098		3304.01	0.17974	3304.01	0.1233		3304.01	0.80217	3304.01	0.55725		2607.76	0.00269	2607.76	0.00383		3304.01	0.75356	3304.01	0.68894		2606.08	0.00632
3302.58	0.17427	3302.58	0.11145		3302.58	0.18701	3302.58	0.14147		3302.58	0.20822	3302.58	0.15314		3302.58	0.19568	3302.58	0.13427		3302.58	0.86219	3302.58	0.59658		2604.9	0.00369	2604.9	0.00257		3302.58	0.81946	3302.58	0.75082		2603.22	0.0063
3301.15	0.18873	3301.15	0.12065		3301.15	0.20398	3301.15	0.1546		3301.15	0.22478	3301.15	0.16581		3301.15	0.21225	3301.15	0.14545		3301.15	0.92621	3301.15	0.63782		2602.04	0.00478	2602.04	0.0017		3301.15	0.88989	3301.15	0.81608		2600.37	0.00614
3299.72	0.20383	3299.72	0.12996		3299.72	0.22033	3299.72	0.16727		3299.72	0.24078	3299.72	0.17807		3299.72	0.22834	3299.72	0.15596		3299.72	0.98922	3299.72	0.67824		2599.19	0.00493	2599.19	0.00211		3299.72	0.95932	3299.72	0.8793		2597.51	0.00586
3298.29	0.2191	3298.29	0.13915		3298.29	0.2349	3298.29	0.17856		3298.29	0.2553	3298.29	0.189		3298.29	0.24276	3298.29	0.16503		3298.29	1.04621	3298.29	0.71519		2596.33	0.00403	2596.33	0.00327		3298.29	1.02116	3298.29	0.9342		2594.65	0.00561
3296.86	0.23415	3296.86	0.14809		3296.86	0.24686	3296.86	0.18788		3296.86	0.26763	3296.86	0.19797		3296.86	0.25464	3296.86	0.17222		3296.86	1.09562	3296.86	0.74792		2593.47	0.00304	2593.47	0.00393		3296.86	1.07148	3296.86	0.97733		2591.8	0.00556
3295.43	0.24889	3295.43	0.15687		3295.43	0.25613	3295.43	0.1952		3295.43	0.27747	3295.43	0.20491		3295.43	0.26371	3295.43	0.17755		3295.43	1.14036	3295.43	0.77793		2590.61	0.00316	2590.61	0.00344		3295.43	1.11047	3295.43	1.01022		2588.94	0.00567
3294	0.26374	3294	0.16583		3294	0.26351	3294	0.20114		3294	0.28531	3294	0.21029		3294	0.27042	3294	0.18153		3294	1.18518	3294	0.80801		2587.75	0.00461	2587.75	0.00234		3294	1.14149	3294	1.0378		2586.08	0.00587
3292.57	0.2796	3292.57	0.17551		3292.57	0.27045	3292.57	0.20669		3292.57	0.2923	3292.57	0.21498		3292.57	0.27583	3292.57	0.18499		3292.57	1.23405	3292.57	0.841		2584.89	0.00624	2584.89	0.00171		3292.57	1.1701	3292.57	1.06577		2583.22	0.00616
3291.14	0.29742	3291.14	0.1864		3291.14	0.27834	3291.14	0.21282		3291.14	0.29974	3291.14	0.21998		3291.14	0.28111	3291.14	0.18877		3291.14	1.29064	3291.14	0.87952		2582.03	0.00643	2582.03	0.00207		3291.14	1.203	3291.14	1.09918		2580.37	0.00654
3289.71	0.31779	3289.71	0.19872		3289.71	0.28806	3289.71	0.22019		3289.71	0.30862	3289.71	0.22608		3289.71	0.28724	3289.71	0.1935		3289.71	1.35844	3289.71	0.92492		2579.17	0.00483	2579.17	0.00288		3289.71	1.24449	3289.71	1.14061		2577.51	0.00689
3288.28	0.34076	3288.28	0.21234		3288.28	0.29977	3288.28	0.22897		3288.28	0.31928	3288.28	0.23357		3288.28	0.29468	3288.28	0.19933		3288.28	1.43745	3288.28	0.97536		2576.31	0.00286	2576.31	0.00327		3288.28	1.29326	3288.28	1.18799		2574.65	0.00702
3286.85	0.36575	3286.85	0.22681		3286.85	0.31302	3286.85	0.23885		3286.85	0.33126	3286.85	0.24213		3286.85	0.30324	3286.85	0.20596		3286.85	1.52042	3286.85	1.02548		2573.45	0.0022	2573.45	0.00288		3286.85	1.34412	3286.85	1.23565		2571.8	0.00683
3285.42	0.39157	3285.42	0.24135		3285.42	0.32684	3285.42	0.24912		3285.42	0.34352	3285.42	0.25101		3285.42	0.31223	3285.42	0.2128		3285.42	1.59447	3285.42	1.0689		2570.59	0.00322	2570.59	0.00212		3285.42	1.39234	3285.42	1.27857		2568.94	0.0064
3283.99	0.41637	3283.99	0.25493		3283.99	0.33984	3283.99	0.2587		3283.99	0.3546	3283.99	0.25911		3283.99	0.32054	3283.99	0.21907		3283.99	1.64831	3283.99	1.10074		2567.73	0.00462	2567.73	0.0017		3283.99	1.43386	3283.99	1.31395		2566.08	0.00591
3282.56	0.43761	3282.56	0.26624		3282.56	0.35014	3282.56	0.26617		3282.56	0.36277	3282.56	0.26514		3282.56	0.32674	3282.56	0.22376		3282.56	1.67721	3282.56	1.11729		2564.87	0.00472	2564.87	0.00186		3282.56	1.46129	3282.56	1.33793		2563.22	0.00553
3281.14	0.45227	3281.14	0.2738		3281.14	0.35567	3281.14	0.27008		3281.14	0.36629	3281.14	0.26779		3281.14	0.32924	3281.14	0.22571		3281.14	1.67948	3281.14	1.1156		2562.01	0.00318	2562.01	0.00232		3281.14	1.46407	3281.14	1.34334		2560.37	0.00529
3279.71	0.45748	3279.71	0.27625		3279.71	0.35467	3279.71	0.26923		3279.71	0.36367	3279.71	0.26601		3279.71	0.32665	3279.71	0.22395		3279.71	1.64956	3279.71	1.09403		2559.15	0.00142	2559.15	0.00275		3279.71	1.43525	3279.71	1.32275		2557.51	0.00512
3278.28	0.45131	3278.28	0.27272		3278.28	0.34621	3278.28	0.26292		3278.28	0.35409	3278.28	0.25921		3278.28	0.3181	3278.28	0.21787		3278.28	1.58255	3278.28	1.05232		2556.29	0.00111	2556.29	0.00294		3278.28	1.37616	3278.28	1.2729		2554.65	0.00508
3276.85	0.43346	3276.85	0.263		3276.85	0.33052	3276.85	0.2512		3276.85	0.33763	3276.85	0.24742		3276.85	0.3035	3276.85	0.20746		3276.85	1.48354	3276.85	0.99344		2553.44	0.00253	2553.44	0.00285		3276.85	1.29425	3276.85	1.19732		2551.79	0.00524
3275.42	0.40555	3275.42	0.24772		3275.42	0.30892	3275.42	0.23489		3275.42	0.31535	3275.42	0.23135		3275.42	0.28379	3275.42	0.19342		3275.42	1.36802	3275.42	0.92472		2550.58	0.00428	2550.58	0.00266		3275.42	1.19828	3275.42	1.1055		2548.94	0.00556
3273.99	0.37086	3273.99	0.22834		3273.99	0.2834	3273.99	0.21543		3273.99	0.28914	3273.99	0.21239		3273.99	0.26089	3273.99	0.1771		3273.99	1.25248	3273.99	0.8543		2547.72	0.00452	2547.72	0.00256		3273.99	1.0959	3273.99	1.00825		2546.08	0.00586
3272.56	0.33333	3272.56	0.20679		3272.56	0.25615	3272.56	0.19447		3272.56	0.26131	3272.56	0.19217		3272.56	0.23707	3272.56	0.1601		3272.56	1.14613	3272.56	0.78723		2544.86	0.0031	2544.86	0.00275		3272.56	0.99354	3272.56	0.91331		2543.22	0.00603
3271.13	0.29637	3271.13	0.18493		3271.13	0.22915	3271.13	0.17354		3271.13	0.23392	3271.13	0.17224		3271.13	0.21415	3271.13	0.14378		3271.13	1.05107	3271.13	0.72547		2542	0.00167	2542	0.00317		3271.13	0.89663	3271.13	0.82497		2540.37	0.00609
3269.7	0.26204	3269.7	0.16411		3269.7	0.20389	3269.7	0.15385		3269.7	0.20835	3269.7	0.15368		3269.7	0.19309	3269.7	0.12896		3269.7	0.96615	3269.7	0.66929		2539.14	0.00169	2539.14	0.00348		3269.7	0.80851	3269.7	0.74499		2537.51	0.00608
3268.27	0.23101	3268.27	0.14495		3268.27	0.18105	3268.27	0.13603		3268.27	0.18508	3268.27	0.13691		3268.27	0.17407	3268.27	0.11593		3268.27	0.88885	3268.27	0.61778		2536.28	0.00324	2536.28	0.00348		3268.27	0.72965	3268.27	0.67298		2534.65	0.00604
3266.84	0.20322	3266.84	0.12762		3266.84	0.16058	3266.84	0.12012		3266.84	0.16414	3266.84	0.12187		3266.84	0.15684	3266.84	0.10455		3266.84	0.81654	3266.84	0.56937		2533.42	0.00482	2533.42	0.00325		3266.84	0.65876	3266.84	0.60731		2531.79	0.00598
3265.41	0.17852	3265.41	0.11211		3265.41	0.14218	3265.41	0.10588		3265.41	0.14555	3265.41	0.10834		3265.41	0.14111	3265.41	0.0945		3265.41	0.7481	3265.41	0.52328		2530.56	0.00496	2530.56	0.00299		3265.41	0.59444	3265.41	0.54689		2528.94	0.00592
3263.98	0.15685	3263.98	0.09845		3263.98	0.12565	3263.98	0.0931		3263.98	0.12936	3263.98	0.09623		3263.98	0.12665	3263.98	0.08543		3263.98	0.68436	3263.98	0.48002		2527.7	0.00381	2527.7	0.003		3263.98	0.53598	3263.98	0.4918		2526.08	0.00579
3262.55	0.13816	3262.55	0.08664		3262.55	0.1109	3262.55	0.08168		3262.55	0.11546	3262.55	0.08548		3262.55	0.11331	3262.55	0.0771		3262.55	0.6265	3262.55	0.44041		2524.84	0.00277	2524.84	0.00323		3262.55	0.48327	3262.55	0.44246		2523.22	0.00555
3261.12	0.12214	3261.12	0.07652		3261.12	0.09787	3261.12	0.07156		3261.12	0.10348	3261.12	0.07597		3261.12	0.101	3261.12	0.06934		3261.12	0.5746	3261.12	0.40461		2521.98	0.00306	2521.98	0.00341		3261.12	0.4363	3261.12	0.39875		2520.37	0.00534
3259.69	0.10838	3259.69	0.06781		3259.69	0.08647	3259.69	0.06268		3259.69	0.09298	3259.69	0.0675		3259.69	0.08973	3259.69	0.06198		3259.69	0.52786	3259.69	0.37212		2519.12	0.00463	2519.12	0.00339		3259.69	0.39485	3259.69	0.35998		2517.51	0.00541
3258.26	0.0965	3258.26	0.06024		3258.26	0.07671	3258.26	0.05502		3258.26	0.08365	3258.26	0.05993		3258.26	0.07957	3258.26	0.05495		3258.26	0.4856	3258.26	0.34245		2516.26	0.00612	2516.26	0.00321		3258.26	0.35839	3258.26	0.3255		2514.65	0.0058
3256.83	0.08631	3256.83	0.05366		3256.83	0.06859	3256.83	0.04857		3256.83	0.07534	3256.83	0.05329		3256.83	0.07072	3256.83	0.04837		3256.83	0.44767	3256.83	0.3156		2513.4	0.0061	2513.4	0.00303		3256.83	0.3264	3256.83	0.29499		2511.79	0.00633
3255.4	0.0777	3255.4	0.048		3255.4	0.06202	3255.4	0.04333		3255.4	0.06808	3255.4	0.0477		3255.4	0.06344	3255.4	0.04254		3255.4	0.41416	3255.4	0.29186		2510.54	0.00468	2510.54	0.00282		3255.4	0.29852	3255.4	0.26838		2508.94	0.00675
3253.97	0.07054	3253.97	0.04317		3253.97	0.05682	3253.97	0.0392		3253.97	0.06189	3253.97	0.04319		3253.97	0.05783	3253.97	0.03766		3253.97	0.38484	3253.97	0.27123		2507.68	0.00344	2507.68	0.00254		3253.97	0.27417	3253.97	0.2454		2506.08	0.007
3252.54	0.06456	3252.54	0.03901		3252.54	0.05265	3252.54	0.03586		3252.54	0.0566	3252.54	0.03952		3252.54	0.05367	3252.54	0.03373		3252.54	0.35895	3252.54	0.25312		2504.83	0.00381	2504.83	0.00239		3252.54	0.25235	3252.54	0.22534		2503.22	0.00713
3251.11	0.05944	3251.11	0.03536		3251.11	0.04899	3251.11	0.0329		3251.11	0.05197	3251.11	0.03632		3251.11	0.05064	3251.11	0.03056		3251.11	0.33539	3251.11	0.23647		2501.97	0.0056	2501.97	0.00263		3251.11	0.23208	3251.11	0.20722		2500.37	0.00717
3249.68	0.05484	3249.68	0.03208		3249.68	0.04547	3249.68	0.02999		3249.68	0.04784	3249.68	0.03334		3249.68	0.04838	3249.68	0.02799		3249.68	0.31327	3249.68	0.22053		2499.11	0.00702	2499.11	0.00318		3249.68	0.21306	3249.68	0.19029		2497.51	0.00708
3248.25	0.05054	3248.25	0.02912		3248.25	0.04195	3248.25	0.02712		3248.25	0.04427	3248.25	0.03061		3248.25	0.0467	3248.25	0.02607		3248.25	0.29246	3248.25	0.20531		2496.25	0.00658	2496.25	0.00351		3248.25	0.19567	3248.25	0.17447		2494.65	0.00685
3246.82	0.04648	3246.82	0.02652		3246.82	0.03856	3246.82	0.02449		3246.82	0.04132	3246.82	0.02824		3246.82	0.04548	3246.82	0.02495		3246.82	0.27348	3246.82	0.19131		2493.39	0.00459	2493.39	0.00309		3246.82	0.18043	3246.82	0.16011		2491.79	0.00653
3245.39	0.04271	3245.39	0.02433		3245.39	0.03543	3245.39	0.02226		3245.39	0.03885	3245.39	0.02621		3245.39	0.04452	3245.39	0.02468		3245.39	0.25678	3245.39	0.17893		2490.53	0.0028	2490.53	0.00215		3245.39	0.16749	3245.39	0.14745		2488.94	0.00619
3243.96	0.03928	3243.96	0.02248		3243.96	0.03264	3243.96	0.02043		3243.96	0.03652	3243.96	0.0243		3243.96	0.04348	3243.96	0.02498		3243.96	0.24232	3243.96	0.16811		2487.67	0.00264	2487.67	0.0018		3243.96	0.15654	3243.96	0.1364		2486.08	0.00586
3242.53	0.03621	3242.53	0.02085		3242.53	0.0302	3242.53	0.01883		3242.53	0.0341	3242.53	0.02235		3242.53	0.04208	3242.53	0.02538		3242.53	0.22953	3242.53	0.15846		2484.81	0.00398	2484.81	0.00252		3242.53	0.14693	3242.53	0.12658		2483.22	0.00552
3241.1	0.03345	3241.1	0.01924		3241.1	0.02813	3241.1	0.01736		3241.1	0.0316	3241.1	0.02039		3241.1	0.04019	3241.1	0.02547		3241.1	0.21772	3241.1	0.14949		2481.95	0.00528	2481.95	0.00369		3241.1	0.13794	3241.1	0.11756		2480.36	0.00522
3239.67	0.03094	3239.67	0.01758		3239.67	0.02646	3239.67	0.01604		3239.67	0.02916	3239.67	0.01857		3239.67	0.03773	3239.67	0.02497		3239.67	0.20633	3239.67	0.14091		2479.09	0.00509	2479.09	0.00396		3239.67	0.12896	3239.67	0.10899		2477.51	0.00507
3238.24	0.02864	3238.24	0.01584		3238.24	0.02516	3238.24	0.01489		3238.24	0.02686	3238.24	0.01698		3238.24	0.03471	3238.24	0.02373		3238.24	0.19513	3238.24	0.13256		2476.23	0.00357	2476.23	0.00276		3238.24	0.11966	3238.24	0.10065		2474.65	0.00518
3236.81	0.02654	3236.81	0.01409		3236.81	0.02412	3236.81	0.01386		3236.81	0.02466	3236.81	0.01559		3236.81	0.0313	3236.81	0.02173		3236.81	0.18414	3236.81	0.12439		2473.37	0.00222	2473.37	0.00121		3236.81	0.1101	3236.81	0.09244		2471.79	0.00553
3235.38	0.02468	3235.38	0.0125		3235.38	0.02319	3235.38	0.01291		3235.38	0.02257	3235.38	0.01431		3235.38	0.02786	3235.38	0.01917		3235.38	0.17372	3235.38	0.11654		2470.51	0.00231	2470.51	0.00102		3235.38	0.10077	3235.38	0.0846		2468.94	0.00588
3233.96	0.02317	3233.96	0.01125		3233.96	0.02227	3233.96	0.01202		3233.96	0.02075	3233.96	0.01316		3233.96	0.02485	3233.96	0.01645		3233.96	0.16441	3233.96	0.10946		2467.65	0.00352	2467.65	0.00256		3233.96	0.09238	3233.96	0.07757		2466.08	0.00598
3232.53	0.02209	3232.53	0.01046		3232.53	0.0213	3232.53	0.01125		3232.53	0.01943	3232.53	0.01225		3232.53	0.02263	3232.53	0.01399		3232.53	0.15655	3232.53	0.10358		2464.79	0.00439	2464.79	0.00423		3232.53	0.08553	3232.53	0.07173		2463.22	0.00583
3231.1	0.02134	3231.1	0.01007		3231.1	0.02024	3231.1	0.01061		3231.1	0.01866	3231.1	0.01162		3231.1	0.02132	3231.1	0.01204		3231.1	0.14999	3231.1	0.09893		2461.93	0.00398	2461.93	0.00412		3231.1	0.08032	3231.1	0.06706		2460.36	0.00561
3229.67	0.0207	3229.67	0.00992		3229.67	0.0191	3229.67	0.01011		3229.67	0.01824	3229.67	0.01118		3229.67	0.02086	3229.67	0.01068		3229.67	0.14423	3229.67	0.09498		2459.08	0.00276	2459.08	0.00218		3229.67	0.07631	3229.67	0.06314		2457.51	0.00547
3228.24	0.01995	3228.24	0.00987		3228.24	0.01803	3228.24	0.00974		3228.24	0.01792	3228.24	0.01076		3228.24	0.02107	3228.24	0.00986		3228.24	0.13886	3228.24	0.09114		2456.22	0.00207	2456.22	0.0005		3228.24	0.07287	3228.24	0.05954		2454.65	0.00542
3226.81	0.01897	3226.81	0.00977		3226.81	0.01718	3226.81	0.00945		3226.81	0.01746	3226.81	0.01028		3226.81	0.02173	3226.81	0.00961		3226.81	0.13372	3226.81	0.08724		2453.36	0.0027	2453.36	0.00099		3226.81	0.06959	3226.81	0.05606		2451.79	0.00551
3225.38	0.01783	3225.38	0.00951		3225.38	0.0166	3225.38	0.00925		3225.38	0.01677	3225.38	0.00969		3225.38	0.02261	3225.38	0.00994		3225.38	0.12885	3225.38	0.08347		2450.5	0.00401	2450.5	0.00321		3225.38	0.06644	3225.38	0.05275		2448.94	0.00584
3223.95	0.01667	3223.95	0.00903		3223.95	0.01623	3223.95	0.0091		3223.95	0.0158	3223.95	0.009		3223.95	0.02354	3223.95	0.01087		3223.95	0.1243	3223.95	0.08		2447.64	0.00461	2447.64	0.0048		3223.95	0.06346	3223.95	0.04964		2446.08	0.00643
3222.52	0.01565	3222.52	0.00834		3222.52	0.01599	3222.52	0.00895		3222.52	0.01462	3222.52	0.00825		3222.52	0.02436	3222.52	0.01227		3222.52	0.12002	3222.52	0.07672		2444.78	0.00394	2444.78	0.00405		3222.52	0.06053	3222.52	0.04663		2443.22	0.00707
3221.09	0.01482	3221.09	0.00751		3221.09	0.01582	3221.09	0.00872		3221.09	0.01349	3221.09	0.00761		3221.09	0.0249	3221.09	0.01384		3221.09	0.11586	3221.09	0.07347		2441.92	0.00272	2441.92	0.00186		3221.09	0.05741	3221.09	0.04365		2440.36	0.00749
3219.66	0.01416	3219.66	0.0067		3219.66	0.0157	3219.66	0.0084		3219.66	0.01264	3219.66	0.00724		3219.66	0.02495	3219.66	0.01524		3219.66	0.11181	3219.66	0.07034		2439.06	0.00213	2439.06	0.00068		3219.66	0.0541	3219.66	0.04089		2437.51	0.0076
3218.23	0.01364	3218.23	0.00604		3218.23	0.01555	3218.23	0.00807		3218.23	0.01221	3218.23	0.00711		3218.23	0.0244	3218.23	0.01621		3218.23	0.10796	3218.23	0.06759		2436.2	0.0026	2436.2	0.00177		3218.23	0.05088	3218.23	0.0386		2434.65	0.0075
3216.8	0.01326	3216.8	0.00561		3216.8	0.01528	3216.8	0.00774		3216.8	0.0121	3216.8	0.00713		3216.8	0.0234	3216.8	0.01662		3216.8	0.10441	3216.8	0.06523		2433.34	0.00363	2433.34	0.00391		3216.8	0.04807	3216.8	0.03673		2431.79	0.00728
3215.37	0.013	3215.37	0.0054		3215.37	0.01479	3215.37	0.00742		3215.37	0.01219	3215.37	0.00718		3215.37	0.0221	3215.37	0.01642		3215.37	0.10116	3215.37	0.06305		2430.48	0.00434	2430.48	0.00485		3215.37	0.0458	3215.37	0.03503		2428.94	0.00694
3213.94	0.01282	3213.94	0.00539		3213.94	0.01408	3213.94	0.0071		3213.94	0.01241	3213.94	0.00724		3213.94	0.02054	3213.94	0.01552		3213.94	0.09824	3213.94	0.06096		2427.62	0.00436	2427.62	0.00371		3213.94	0.04403	3213.94	0.0333		2426.08	0.00648
3212.51	0.01267	3212.51	0.00558		3212.51	0.01328	3212.51	0.00684		3212.51	0.01274	3212.51	0.00738		3212.51	0.01882	3212.51	0.01401		3212.51	0.09569	3212.51	0.05905		2424.76	0.00389	2424.76	0.00189		3212.51	0.04256	3212.51	0.0316		2423.22	0.00593
3211.08	0.01251	3211.08	0.00593		3211.08	0.01256	3211.08	0.00664		3211.08	0.01308	3211.08	0.00764		3211.08	0.01721	3211.08	0.01211		3211.08	0.09338	3211.08	0.0574		2421.9	0.00364	2421.9	0.00135		3211.08	0.04108	3211.08	0.02997		2420.36	0.00543
3209.65	0.01223	3209.65	0.00623		3209.65	0.01201	3209.65	0.00648		3209.65	0.01329	3209.65	0.00787		3209.65	0.01591	3209.65	0.01004		3209.65	0.0911	3209.65	0.05583		2419.04	0.00394	2419.04	0.00255		3209.65	0.03944	3209.65	0.02841		2417.51	0.00516
3208.22	0.01176	3208.22	0.00633		3208.22	0.01164	3208.22	0.0063		3208.22	0.01321	3208.22	0.00798		3208.22	0.01501	3208.22	0.00805		3208.22	0.08877	3208.22	0.05421		2416.18	0.00457	2416.18	0.00409		3208.22	0.03779	3208.22	0.02692		2414.65	0.0052
3206.79	0.01118	3206.79	0.00619		3206.79	0.0114	3206.79	0.0061		3206.79	0.01286	3206.79	0.00796		3206.79	0.01464	3206.79	0.00646		3206.79	0.08659	3206.79	0.05258		2413.32	0.00494	2413.32	0.0044		3206.79	0.03639	3206.79	0.02563		2411.79	0.00541
3205.36	0.01067	3205.36	0.00591		3205.36	0.01126	3205.36	0.00589		3205.36	0.01236	3205.36	0.00789		3205.36	0.01484	3205.36	0.00555		3205.36	0.08473	3205.36	0.05106		2410.47	0.00476	2410.47	0.00336		3205.36	0.03536	3205.36	0.02471		2408.93	0.00564
3203.93	0.01035	3203.93	0.00552		3203.93	0.01114	3203.93	0.0056		3203.93	0.01178	3203.93	0.00782		3203.93	0.0155	3203.93	0.00542		3203.93	0.08311	3203.93	0.04974		2407.61	0.00432	2407.61	0.00205		3203.93	0.03463	3203.93	0.02422		2406.08	0.0058
3202.5	0.01023	3202.5	0.00509		3202.5	0.011	3202.5	0.00523		3202.5	0.01129	3202.5	0.00778		3202.5	0.01642	3202.5	0.00615		3202.5	0.08154	3202.5	0.04859		2404.75	0.00416	2404.75	0.00164		3202.5	0.03406	3202.5	0.02402		2403.22	0.00589
3201.07	0.01026	3201.07	0.00471		3201.07	0.01084	3201.07	0.00494		3201.07	0.01107	3201.07	0.00781		3201.07	0.01754	3201.07	0.00772		3201.07	0.07994	3201.07	0.04753		2401.89	0.00428	2401.89	0.00212		3201.07	0.03356	3201.07	0.02386		2400.36	0.00589
3199.64	0.01038	3199.64	0.00448		3199.64	0.01062	3199.64	0.00484		3199.64	0.01127	3199.64	0.00795		3199.64	0.01878	3199.64	0.00992		3199.64	0.07837	3199.64	0.04652		2399.03	0.00423	2399.03	0.00266		3199.64	0.03295	3199.64	0.0235		2397.51	0.00588
3198.21	0.01052	3198.21	0.00447		3198.21	0.0103	3198.21	0.00488		3198.21	0.01185	3198.21	0.00815		3198.21	0.0199	3198.21	0.01228		3198.21	0.07684	3198.21	0.04558		2396.17	0.00373	2396.17	0.00268		3198.21	0.0321	3198.21	0.02282		2394.65	0.00591
3196.78	0.01063	3196.78	0.00469		3196.78	0.00986	3196.78	0.00495		3196.78	0.01258	3196.78	0.00836		3196.78	0.02056	3196.78	0.01423		3196.78	0.07527	3196.78	0.04469		2393.31	0.0027	2393.31	0.00202		3196.78	0.03099	3196.78	0.02177		2391.79	0.00599
3195.35	0.0107	3195.35	0.00513		3195.35	0.00943	3195.35	0.00501		3195.35	0.01327	3195.35	0.0086		3195.35	0.02062	3195.35	0.01542		3195.35	0.07367	3195.35	0.04381		2390.45	0.00162	2390.45	0.00102		3195.35	0.02968	3195.35	0.02043		2388.93	0.00621
3193.92	0.0107	3193.92	0.00569		3193.92	0.00912	3193.92	0.00507		3193.92	0.01376	3193.92	0.00887		3193.92	0.02014	3193.92	0.01575		3193.92	0.07215	3193.92	0.04291		2387.59	0.00112	2387.59	0.00029		3193.92	0.02827	3193.92	0.01893		2386.08	0.00673
3192.49	0.01058	3192.49	0.00619		3192.49	0.00893	3192.49	0.00507		3192.49	0.01395	3192.49	0.00913		3192.49	0.01924	3192.49	0.01527		3192.49	0.07079	3192.49	0.04203		2384.73	0.00128	2384.73	0.00022		3192.49	0.02696	3192.49	0.0175		2383.22	0.00767
3191.06	0.01032	3191.06	0.00646		3191.06	0.00878	3191.06	0.0049		3191.06	0.01375	3191.06	0.00928		3191.06	0.01808	3191.06	0.0141		3191.06	0.06962	3191.06	0.0412		2381.87	0.00162	2381.87	0.00075		3191.06	0.02599	3191.06	0.01637		2380.36	0.0089
3189.63	0.00998	3189.63	0.00644		3189.63	0.00863	3189.63	0.00457		3189.63	0.01323	3189.63	0.00931		3189.63	0.01685	3189.63	0.01247		3189.63	0.06868	3189.63	0.04045		2379.01	0.00161	2379.01	0.00141		3189.63	0.0255	3189.63	0.01579		2377.51	0.01014
3188.21	0.00969	3188.21	0.00619		3188.21	0.00851	3188.21	0.0042		3188.21	0.01253	3188.21	0.00925		3188.21	0.01571	3188.21	0.01064		3188.21	0.06798	3188.21	0.03981		2376.15	0.00108	2376.15	0.00154		3188.21	0.0255	3188.21	0.01586		2374.65	0.01114
3186.78	0.00954	3186.78	0.00584		3186.78	0.0084	3186.78	0.00392		3186.78	0.01183	3186.78	0.00908		3186.78	0.01477	3186.78	0.00885		3186.78	0.06735	3186.78	0.0392		2373.29	0.00044	2373.29	0.00079		3186.78	0.02584	3186.78	0.01646		2371.79	0.01173
3185.35	0.00952	3185.35	0.00546		3185.35	0.00824	3185.35	0.00379		3185.35	0.01123	3185.35	0.00877		3185.35	0.01413	3185.35	0.00727		3185.35	0.06651	3185.35	0.03846		2370.43	0.0003	2370.43	-0.00031		3185.35	0.02622	3185.35	0.01727		2368.93	0.01171
3183.92	0.00957	3183.92	0.00511		3183.92	0.00798	3183.92	0.0038		3183.92	0.01086	3183.92	0.00836		3183.92	0.01387	3183.92	0.00611		3183.92	0.0653	3183.92	0.03753		2367.57	0.00067	2367.57	-0.00068		3183.92	0.02636	3183.92	0.01793		2366.08	0.01077
3182.49	0.00965	3182.49	0.00484		3182.49	0.00769	3182.49	0.00394		3182.49	0.01081	3182.49	0.00802		3182.49	0.014	3182.49	0.00552		3182.49	0.06383	3182.49	0.03653		2364.72	0.00114	2364.72	0.0003		3182.49	0.02607	3182.49	0.01815		2363.22	0.00909
3181.06	0.00974	3181.06	0.00477		3181.06	0.0075	3181.06	0.00421		3181.06	0.01115	3181.06	0.00791		3181.06	0.01449	3181.06	0.00569		3181.06	0.06226	3181.06	0.03559		2361.86	0.00175	2361.86	0.00166		3181.06	0.02528	3181.06	0.01775		2360.36	0.00832
3179.63	0.00987	3179.63	0.00498		3179.63	0.00749	3179.63	0.0046		3179.63	0.01181	3179.63	0.00813		3179.63	0.01525	3179.63	0.00667		3179.63	0.06069	3179.63	0.03475		2359	0.00231	2359	0.00179		3179.63	0.02399	3179.63	0.01674		2357.51	0.00986
3178.2	0.01	3178.2	0.00546		3178.2	0.00761	3178.2	0.00501		3178.2	0.01258	3178.2	0.00863		3178.2	0.01606	3178.2	0.00833		3178.2	0.05917	3178.2	0.03404		2356.14	0.00215	2356.14	0.00102		3178.2	0.02236	3178.2	0.01528		2354.65	0.01249
3176.77	0.01004	3176.77	0.00603		3176.77	0.00767	3176.77	0.00524		3176.77	0.01319	3176.77	0.00925		3176.77	0.0167	3176.77	0.01033		3176.77	0.0578	3176.77	0.03344		2353.28	0.00152	2353.28	0.00101		3176.77	0.02067	3176.77	0.01369		2351.79	0.01431
3175.34	0.0099	3175.34	0.0065		3175.34	0.00755	3175.34	0.00515		3175.34	0.01341	3175.34	0.00981		3175.34	0.01717	3175.34	0.01231		3175.34	0.05674	3175.34	0.03291		2350.42	0.00121	2350.42	0.00194		3175.34	0.01919	3175.34	0.01226		2348.93	0.01498
3173.91	0.00962	3173.91	0.00676		3173.91	0.00728	3173.91	0.00478		3173.91	0.01316	3173.91	0.01013		3173.91	0.01754	3173.91	0.01395		3173.91	0.05599	3173.91	0.03238		2347.56	0.00139	2347.56	0.00269		3173.91	0.0182	3173.91	0.0113		2346.08	0.01495
3172.48	0.00924	3172.48	0.00678		3172.48	0.00698	3172.48	0.00429		3172.48	0.01248	3172.48	0.0101		3172.48	0.01777	3172.48	0.015		3172.48	0.0554	3172.48	0.03177		2344.7	0.00173	2344.7	0.00233		3172.48	0.01796	3172.48	0.01108		2343.22	0.01456
3171.05	0.00881	3171.05	0.00656		3171.05	0.0067	3171.05	0.00382		3171.05	0.01149	3171.05	0.00965		3171.05	0.0177	3171.05	0.01529		3171.05	0.05478	3171.05	0.03107		2341.84	0.0017	2341.84	0.00097		3171.05	0.01856	3171.05	0.01162		2340.36	0.0142
3169.62	0.00844	3169.62	0.00616		3169.62	0.00643	3169.62	0.0035		3169.62	0.01037	3169.62	0.00886		3169.62	0.01725	3169.62	0.01478		3169.62	0.05398	3169.62	0.0303		2338.98	0.00108	2338.98	-5e-05		3169.62	0.01978	3169.62	0.01269		2337.5	0.01429
3168.19	0.00824	3168.19	0.0057		3168.19	0.00622	3168.19	0.00343		3168.19	0.00937	3168.19	0.00796		3168.19	0.01649	3168.19	0.01357		3168.19	0.05298	3168.19	0.0295		2336.12	0.00034	2336.12	0.00053		3168.19	0.02113	3168.19	0.01389		2334.65	0.01486
3166.76	0.00826	3166.76	0.00532		3166.76	0.00615	3166.76	0.00363		3166.76	0.00869	3166.76	0.00722		3166.76	0.0156	3166.76	0.01194		3166.76	0.05182	3166.76	0.0287		2333.26	3e-05	2333.26	0.00228		3166.76	0.02206	3166.76	0.01477		2331.79	0.01547
3165.33	0.00847	3165.33	0.00514		3165.33	0.00622	3165.33	0.00405		3165.33	0.00849	3165.33	0.00679		3165.33	0.01476	3165.33	0.01022		3165.33	0.05049	3165.33	0.0279		2330.4	0.00026	2330.4	0.00335		3165.33	0.0221	3165.33	0.015		2328.93	0.01568
3163.9	0.00878	3163.9	0.00521		3163.9	0.00635	3163.9	0.00455		3163.9	0.00879	3163.9	0.00672		3163.9	0.01414	3163.9	0.00869		3163.9	0.04901	3163.9	0.02709		2327.54	0.00065	2327.54	0.00252		3163.9	0.02109	3163.9	0.01439		2326.08	0.01538
3162.47	0.00908	3162.47	0.00551		3162.47	0.00645	3162.47	0.00498		3162.47	0.0095	3162.47	0.00696		3162.47	0.01377	3162.47	0.00752		3162.47	0.04741	3162.47	0.02628		2324.68	0.00057	2324.68	0.0008		3162.47	0.01919	3162.47	0.01296		2323.22	0.01457
3161.04	0.00927	3161.04	0.00598		3161.04	0.00649	3161.04	0.0052		3161.04	0.01035	3161.04	0.00747		3161.04	0.01369	3161.04	0.00682		3161.04	0.04581	3161.04	0.0255		2321.82	-0.00025	2321.82	0.00019		3161.04	0.01673	3161.04	0.01094		2320.36	0.0134
3159.61	0.00928	3159.61	0.00648		3159.61	0.00642	3159.61	0.00515		3159.61	0.01107	3159.61	0.00816		3159.61	0.01386	3159.61	0.0067		3159.61	0.04434	3159.61	0.02476		2318.97	-0.00131	2318.97	0.00112		3159.61	0.01415	3159.61	0.00873		2317.5	0.01222
3158.18	0.00905	3158.18	0.00686		3158.18	0.00614	3158.18	0.00483		3158.18	0.01139	3158.18	0.00882		3158.18	0.0142	3158.18	0.00719		3158.18	0.04308	3158.18	0.02404		2316.11	-0.00166	2316.11	0.00194		3158.18	0.01189	3158.18	0.00677		2314.65	0.01138
3156.75	0.0086	3156.75	0.00697		3156.75	0.00565	3156.75	0.00431		3156.75	0.01119	3156.75	0.00917		3156.75	0.01454	3156.75	0.00816		3156.75	0.04201	3156.75	0.02329		2313.25	-0.00104	2313.25	0.00122		3156.75	0.01036	3156.75	0.00548		2311.79	0.01086
3155.32	0.00798	3155.32	0.00675		3155.32	0.00506	3155.32	0.00372		3155.32	0.01044	3155.32	0.00898		3155.32	0.01479	3155.32	0.00938		3155.32	0.04105	3155.32	0.02245		2310.39	-0.00013	2310.39	-0.0006		3155.32	0.00984	3155.32	0.0051		2308.93	0.01043
3153.89	0.00732	3153.89	0.00624		3153.89	0.00457	3153.89	0.00326		3153.89	0.00931	3153.89	0.00828		3153.89	0.01491	3153.89	0.01066		3153.89	0.04017	3153.89	0.02152		2307.53	0.00016	2307.53	-0.00173		3153.89	0.0104	3153.89	0.00566		2306.08	0.00993
3152.46	0.00679	3152.46	0.00562		3152.46	0.0043	3152.46	0.00305		3152.46	0.00809	3152.46	0.00728		3152.46	0.01499	3152.46	0.01186		3152.46	0.03943	3152.46	0.02069		2304.67	-0.00034	2304.67	-0.0012		3152.46	0.01186	3152.46	0.00706		2303.22	0.00937
3151.03	0.00653	3151.03	0.00505		3151.03	0.00433	3151.03	0.00316		3151.03	0.00712	3151.03	0.00628		3151.03	0.01504	3151.03	0.01285		3151.03	0.03888	3151.03	0.02009		2301.81	-0.00086	2301.81	0.00014		3151.03	0.01376	3151.03	0.00893		2300.36	0.00879
3149.6	0.0066	3149.6	0.0047		3149.6	0.00464	3149.6	0.00358		3149.6	0.00665	3149.6	0.0055		3149.6	0.01505	3149.6	0.01347		3149.6	0.03848	3149.6	0.01977		2298.95	-0.00049	2298.95	0.00063		3149.6	0.01545	3149.6	0.01068		2297.5	0.00822
3148.17	0.0069	3148.17	0.00459		3148.17	0.0051	3148.17	0.00412		3148.17	0.0067	3148.17	0.00508		3148.17	0.01494	3148.17	0.01354		3148.17	0.03803	3148.17	0.01958		2296.09	0.00071	2296.09	-0.00031		3148.17	0.01628	3148.17	0.01159		2294.65	0.00767
3146.74	0.00728	3146.74	0.00469		3146.74	0.00554	3146.74	0.00457		3146.74	0.00717	3146.74	0.00511		3146.74	0.01463	3146.74	0.013		3146.74	0.03728	3146.74	0.01935		2293.23	0.00178	2293.23	-0.00151		3146.74	0.0158	3146.74	0.01123		2291.79	0.00711
3145.31	0.00765	3145.31	0.00499		3145.31	0.00582	3145.31	0.0048		3145.31	0.00789	3145.31	0.0056		3145.31	0.01412	3145.31	0.01193		3145.31	0.03612	3145.31	0.01895		2290.37	0.00183	2290.37	-0.00149		3145.31	0.01392	3145.31	0.00962		2288.93	0.0065
3143.88	0.00792	3143.88	0.00543		3143.88	0.00583	3143.88	0.00473		3143.88	0.00871	3143.88	0.00643		3143.88	0.01343	3143.88	0.01052		3143.88	0.03464	3143.88	0.01837		2287.51	0.00099	2287.51	-0.00013		3143.88	0.01105	3143.88	0.0072		2286.08	0.00593
3142.46	0.00801	3142.46	0.00592		3142.46	0.00554	3142.46	0.0044		3142.46	0.00938	3142.46	0.0073		3142.46	0.01267	3142.46	0.00897		3142.46	0.03311	3142.46	0.01766		2284.65	0.00023	2284.65	0.00117		3142.46	0.0079	3142.46	0.0046		2283.22	0.00551
3141.03	0.00792	3141.03	0.00634		3141.03	0.00504	3141.03	0.00391		3141.03	0.00969	3141.03	0.00796		3141.03	0.01203	3141.03	0.00755		3141.03	0.03187	3141.03	0.01696		2281.79	0.00052	2281.79	0.00127		3141.03	0.00532	3141.03	0.00252		2280.36	0.00531
3139.6	0.00767	3139.6	0.00659		3139.6	0.0045	3139.6	0.0035		3139.6	0.00957	3139.6	0.00828		3139.6	0.01178	3139.6	0.00661		3139.6	0.03119	3139.6	0.01648		2278.93	0.00188	2278.93	0.00055		3139.6	0.00409	3139.6	0.00158		2277.5	0.00533
3138.17	0.00737	3138.17	0.00664		3138.17	0.00414	3138.17	0.0034		3138.17	0.00912	3138.17	0.00824		3138.17	0.01208	3138.17	0.00639		3138.17	0.03115	3138.17	0.01634		2276.07	0.00335	2276.07	0.00038		3138.17	0.00464	3138.17	0.00216		2274.65	0.00561
3136.74	0.00708	3136.74	0.0065		3136.74	0.00414	3136.74	0.00368		3136.74	0.00844	3136.74	0.00787		3136.74	0.01286	3136.74	0.00692		3136.74	0.03157	3136.74	0.01646		2273.21	0.00391	2273.21	0.00139		3136.74	0.00688	3136.74	0.00415		2271.79	0.00615
3135.31	0.00686	3135.31	0.0062		3135.31	0.0045	3135.31	0.0042		3135.31	0.0076	3135.31	0.00722		3135.31	0.0138	3135.31	0.00795		3135.31	0.03207	3135.31	0.01657		2270.36	0.00345	2270.36	0.00274		3135.31	0.01008	3135.31	0.00693		2268.93	0.00678
3133.88	0.00671	3133.88	0.00576		3133.88	0.00507	3133.88	0.00473		3133.88	0.00665	3133.88	0.00633		3133.88	0.01458	3133.88	0.00913		3133.88	0.03226	3133.88	0.0164		2267.5	0.00333	2267.5	0.00335		3133.88	0.0132	3133.88	0.0096		2266.07	0.00729
3132.45	0.00666	3132.45	0.00528		3132.45	0.0056	3132.45	0.00506		3132.45	0.00577	3132.45	0.00537		3132.45	0.01496	3132.45	0.01021		3132.45	0.03189	3132.45	0.0159		2264.64	0.0044	2264.64	0.00314		3132.45	0.01514	3132.45	0.01125		2263.22	0.00756
3131.02	0.00676	3131.02	0.00494		3131.02	0.00595	3131.02	0.00509		3131.02	0.0053	3131.02	0.00465		3131.02	0.01499	3131.02	0.01111		3131.02	0.03098	3131.02	0.0152		2261.78	0.00614	2261.78	0.0029		3131.02	0.01525	3131.02	0.01141		2260.36	0.00764
3129.59	0.00706	3129.59	0.00489		3129.59	0.00608	3129.59	0.00492		3129.59	0.00551	3129.59	0.00455		3129.59	0.01486	3129.59	0.01183		3129.59	0.02979	3129.59	0.01454		2258.92	0.00708	2258.92	0.00321		3129.59	0.01352	3129.59	0.01017		2257.5	0.00759
3128.16	0.00751	3128.16	0.00517		3128.16	0.00607	3128.16	0.00469		3128.16	0.00636	3128.16	0.00517		3128.16	0.01467	3128.16	0.01233		3128.16	0.02863	3128.16	0.01413		2256.06	0.0064	2256.06	0.00377		3128.16	0.0106	3128.16	0.00801		2254.65	0.00742
3126.73	0.00802	3126.73	0.00571		3126.73	0.0059	3126.73	0.00449		3126.73	0.00753	3126.73	0.00632		3126.73	0.01438	3126.73	0.01248		3126.73	0.02764	3126.73	0.01397		2253.2	0.00492	2253.2	0.00402		3126.73	0.00734	3126.73	0.00554		2251.79	0.00709
3125.3	0.00845	3125.3	0.00637		3125.3	0.00554	3125.3	0.00432		3125.3	0.00863	3125.3	0.00764		3125.3	0.01397	3125.3	0.01219		3125.3	0.02676	3125.3	0.01388		2250.34	0.00436	2250.34	0.00407		3125.3	0.00452	3125.3	0.0033		2248.93	0.00667
3123.87	0.0087	3123.87	0.007		3123.87	0.00498	3123.87	0.00417		3123.87	0.00939	3123.87	0.00875		3123.87	0.01339	3123.87	0.01143		3123.87	0.0259	3123.87	0.01367		2247.48	0.00546	2247.48	0.0044		3123.87	0.00265	3123.87	0.00175		2246.07	0.00627
3122.44	0.00868	3122.44	0.00745		3122.44	0.00439	3122.44	0.00409		3122.44	0.00968	3122.44	0.00941		3122.44	0.01265	3122.44	0.01034		3122.44	0.02512	3122.44	0.01334		2244.62	0.00719	2244.62	0.00498		3122.44	0.00212	3122.44	0.00131		2243.22	0.006
3121.01	0.0084	3121.01	0.00762		3121.01	0.00403	3121.01	0.00414		3121.01	0.00956	3121.01	0.0095		3121.01	0.01192	3121.01	0.00918		3121.01	0.02461	3121.01	0.01299		2241.76	0.00783	2241.76	0.00519		3121.01	0.00316	3121.01	0.00216		2240.36	0.00594
3119.58	0.00798	3119.58	0.00748		3119.58	0.00406	3119.58	0.0043		3119.58	0.00912	3119.58	0.00906		3119.58	0.01146	3119.58	0.0082		3119.58	0.0245	3119.58	0.01271		2238.9	0.0068	2238.9	0.00464		3119.58	0.00567	3119.58	0.00419		2237.5	0.00607
3118.15	0.00756	3118.15	0.00708		3118.15	0.0045	3118.15	0.0045		3118.15	0.00845	3118.15	0.00822		3118.15	0.01143	3118.15	0.00757		3118.15	0.02471	3118.15	0.01248		2236.04	0.00528	2236.04	0.00401		3118.15	0.00903	3118.15	0.00693		2234.65	0.00633
3116.72	0.0073	3116.72	0.00655		3116.72	0.00517	3116.72	0.0046		3116.72	0.00766	3116.72	0.0072		3116.72	0.01178	3116.72	0.00734		3116.72	0.02497	3116.72	0.01223		2233.18	0.00483	2233.18	0.0042		3116.72	0.01223	3116.72	0.0096		2231.79	0.00659
3115.29	0.00729	3115.29	0.00602		3115.29	0.00582	3115.29	0.00456		3115.29	0.00697	3115.29	0.00622		3115.29	0.01241	3115.29	0.00751		3115.29	0.02501	3115.29	0.01193		2230.32	0.00566	2230.32	0.00509		3115.29	0.01427	3115.29	0.01143		2228.93	0.00673
3113.86	0.00751	3113.86	0.00565		3113.86	0.00624	3113.86	0.00438		3113.86	0.00661	3113.86	0.00555		3113.86	0.0133	3113.86	0.00804		3113.86	0.02468	3113.86	0.01162		2227.46	0.0066	2227.46	0.00548		3113.86	0.0145	3113.86	0.01184		2226.07	0.00667
3112.43	0.00788	3112.43	0.00554		3112.43	0.00634	3112.43	0.00412		3112.43	0.00676	3112.43	0.00553		3112.43	0.01432	3112.43	0.00882		3112.43	0.02394	3112.43	0.01128		2224.61	0.0063	2224.61	0.00455		3112.43	0.01286	3112.43	0.01066		2223.22	0.00637
3111	0.0083	3111	0.00571		3111	0.00614	3111	0.00386		3111	0.00746	3111	0.00621		3111	0.01519	3111	0.00967		3111	0.0229	3111	0.01093		2221.75	0.00474	2221.75	0.00299		3111	0.00989	3111	0.00829		2220.36	0.00598
3109.57	0.00871	3109.57	0.00617		3109.57	0.00571	3109.57	0.00368		3109.57	0.00857	3109.57	0.00746		3109.57	0.01575	3109.57	0.01045		3109.57	0.02183	3109.57	0.01069		2218.89	0.00324	2218.89	0.00231		3109.57	0.00655	3109.57	0.00554		2217.5	0.00574
3108.14	0.00914	3108.14	0.00686		3108.14	0.00518	3108.14	0.00368		3108.14	0.00981	3108.14	0.00896		3108.14	0.01597	3108.14	0.01114		3108.14	0.02109	3108.14	0.01075		2216.03	0.00312	2216.03	0.0031		3108.14	0.00387	3108.14	0.00334		2214.65	0.00573
3106.71	0.00958	3106.71	0.00766		3106.71	0.00472	3106.71	0.00388		3106.71	0.01092	3106.71	0.01036		3106.71	0.01589	3106.71	0.01168		3106.71	0.02093	3106.71	0.01119		2213.17	0.00422	2213.17	0.00416		3106.71	0.00262	3106.71	0.00234		2211.79	0.00586
3105.28	0.00994	3105.28	0.00835		3105.28	0.00452	3105.28	0.00424		3105.28	0.01169	3105.28	0.01136		3105.28	0.01552	3105.28	0.01194		3105.28	0.02128	3105.28	0.01178		2210.31	0.00518	2210.31	0.00394		3105.28	0.00307	3105.28	0.00279		2208.93	0.00598
3103.85	0.0101	3103.85	0.00875		3103.85	0.00468	3103.85	0.00463		3103.85	0.012	3103.85	0.01175		3103.85	0.01491	3103.85	0.0118		3103.85	0.02186	3103.85	0.01224		2207.45	0.00465	2207.45	0.00243		3103.85	0.00509	3103.85	0.00448		2206.07	0.00612
3102.42	0.00997	3102.42	0.00875		3102.42	0.00513	3102.42	0.00488		3102.42	0.01179	3102.42	0.01145		3102.42	0.01414	3102.42	0.01127		3102.42	0.02247	3102.42	0.0124		2204.59	0.00283	2204.59	0.00114		3102.42	0.00824	3102.42	0.00708		2203.22	0.00631
3100.99	0.00964	3100.99	0.00838		3100.99	0.0057	3100.99	0.00485		3100.99	0.01112	3100.99	0.01053		3100.99	0.01334	3100.99	0.0105		3100.99	0.02296	3100.99	0.01228		2201.73	0.00136	2201.73	0.00138		3100.99	0.01185	3100.99	0.01005		2200.36	0.00649
3099.56	0.00927	3099.56	0.00781		3099.56	0.00621	3099.56	0.00458		3099.56	0.01019	3099.56	0.00926		3099.56	0.0127	3099.56	0.00976		3099.56	0.02329	3099.56	0.01204		2198.87	0.00158	2198.87	0.00266		3099.56	0.01509	3099.56	0.01269		2197.5	0.00659
3098.13	0.00898	3098.13	0.00718		3098.13	0.00659	3098.13	0.00417		3098.13	0.00933	3098.13	0.00805		3098.13	0.01239	3098.13	0.00925		3098.13	0.0234	3098.13	0.01181		2196.01	0.00327	2196.01	0.00344		3098.13	0.01705	3098.13	0.01428		2194.64	0.00666
3096.71	0.00884	3096.71	0.00664		3096.71	0.00676	3096.71	0.00379		3096.71	0.00881	3096.71	0.00729		3096.71	0.01248	3096.71	0.00898		3096.71	0.02317	3096.71	0.01158		2193.15	0.00462	2193.15	0.00297		3096.71	0.01705	3096.71	0.01433		2191.79	0.00674
3095.28	0.00878	3095.28	0.00626		3095.28	0.00657	3095.28	0.00348		3095.28	0.00874	3095.28	0.00719		3095.28	0.01275	3095.28	0.00883		3095.28	0.02244	3095.28	0.01126		2190.29	0.00419	2190.29	0.00203		3095.28	0.01501	3095.28	0.01274		2188.93	0.00677
3093.85	0.0088	3093.85	0.00613		3093.85	0.00597	3093.85	0.00328		3093.85	0.00919	3093.85	0.00778		3093.85	0.01308	3093.85	0.00872		3093.85	0.02126	3093.85	0.01083		2187.43	0.00253	2187.43	0.00188		3093.85	0.01148	3093.85	0.00992		2186.07	0.00671
3092.42	0.00896	3092.42	0.00632		3092.42	0.00514	3092.42	0.00321		3092.42	0.0101	3092.42	0.00892		3092.42	0.0135	3092.42	0.00869		3092.42	0.01992	3092.42	0.01037		2184.57	0.00143	2184.57	0.00256		3092.42	0.00752	3092.42	0.00668		2183.22	0.0066
3090.99	0.00929	3090.99	0.00683		3090.99	0.00438	3090.99	0.00331		3090.99	0.01131	3090.99	0.01033		3090.99	0.01405	3090.99	0.00876		3090.99	0.0188	3090.99	0.01006		2181.71	0.00195	2181.71	0.00314		3090.99	0.00428	3090.99	0.00396		2180.36	0.00661
3089.56	0.00972	3089.56	0.00754		3089.56	0.00391	3089.56	0.00352		3089.56	0.01249	3089.56	0.01168		3089.56	0.01465	3089.56	0.00896		3089.56	0.01818	3089.56	0.01006		2178.86	0.00351	2178.86	0.00316		3089.56	0.00265	3089.56	0.00256		2177.5	0.00683
3088.13	0.01015	3088.13	0.0083		3088.13	0.00379	3088.13	0.00375		3088.13	0.0133	3088.13	0.01259		3088.13	0.01519	3088.13	0.00928		3088.13	0.01816	3088.13	0.01035		2176	0.00455	2176	0.003		3088.13	0.00305	3088.13	0.00286		2174.64	0.00729
3086.7	0.01045	3086.7	0.00889		3086.7	0.004	3086.7	0.00385		3086.7	0.01355	3086.7	0.01279		3086.7	0.01558	3086.7	0.00965		3086.7	0.01864	3086.7	0.01072		2173.14	0.0042	2173.14	0.00315		3086.7	0.00535	3086.7	0.00471		2171.79	0.00792
3085.27	0.01052	3085.27	0.00916		3085.27	0.0045	3085.27	0.00378		3085.27	0.01324	3085.27	0.01222		3085.27	0.01568	3085.27	0.00998		3085.27	0.01937	3085.27	0.01101		2170.28	0.00316	2170.28	0.00334		3085.27	0.00889	3085.27	0.00758		2168.93	0.00868
3083.84	0.0103	3083.84	0.009		3083.84	0.00515	3083.84	0.00353		3083.84	0.01248	3083.84	0.01108		3083.84	0.01545	3083.84	0.01019		3083.84	0.02007	3083.84	0.01108		2167.42	0.00287	2167.42	0.00304		3083.84	0.01269	3083.84	0.0106		2166.07	0.0095
3082.41	0.00983	3082.41	0.00844		3082.41	0.00571	3082.41	0.00315		3082.41	0.01147	3082.41	0.00969		3082.41	0.01489	3082.41	0.01024		3082.41	0.0205	3082.41	0.01088		2164.56	0.00404	2164.56	0.00253		3082.41	0.01572	3082.41	0.01293		2163.22	0.01032
3080.98	0.00925	3080.98	0.00764		3080.98	0.00592	3080.98	0.00273		3080.98	0.01041	3080.98	0.00838		3080.98	0.01407	3080.98	0.01012		3080.98	0.02052	3080.98	0.01043		2161.7	0.0058	2161.7	0.00272		3080.98	0.01708	3080.98	0.0139		2160.36	0.01107
3079.55	0.00875	3079.55	0.00687		3079.55	0.00568	3079.55	0.0024		3079.55	0.00953	3079.55	0.00747		3079.55	0.01314	3079.55	0.00985		3079.55	0.02006	3079.55	0.00984		2158.84	0.0066	2158.84	0.00386		3079.55	0.01632	3079.55	0.01329		2157.5	0.01169
3078.12	0.00849	3078.12	0.00638		3078.12	0.00508	3078.12	0.00233		3078.12	0.00905	3078.12	0.0072		3078.12	0.01229	3078.12	0.0095		3078.12	0.01919	3078.12	0.00931		2155.98	0.00588	2155.98	0.00482		3078.12	0.01372	3078.12	0.01135		2154.64	0.01209
3076.69	0.00851	3076.69	0.00631		3076.69	0.00436	3076.69	0.00258		3076.69	0.00915	3076.69	0.00769		3076.69	0.01166	3076.69	0.00917		3076.69	0.0181	3076.69	0.00902		2153.12	0.00469	2153.12	0.00439		3076.69	0.01014	3076.69	0.00869		2151.79	0.01231
3075.26	0.00878	3075.26	0.00665		3075.26	0.00378	3075.26	0.00306		3075.26	0.00983	3075.26	0.00881		3075.26	0.01135	3075.26	0.00895		3075.26	0.01704	3075.26	0.00903		2150.26	0.00449	2150.26	0.00295		3075.26	0.00664	3075.26	0.00607		2148.93	0.01247
3073.83	0.00919	3073.83	0.00728		3073.83	0.00348	3073.83	0.00357		3073.83	0.01093	3073.83	0.01025		3073.83	0.01141	3073.83	0.00884		3073.83	0.01623	3073.83	0.00926		2147.4	0.0056	2147.4	0.00238		3073.83	0.00408	3073.83	0.00414		2146.07	0.0127
3072.4	0.00962	3072.4	0.00802		3072.4	0.00354	3072.4	0.00395		3072.4	0.0121	3072.4	0.01156		3072.4	0.01178	3072.4	0.00878		3072.4	0.01579	3072.4	0.00958		2144.54	0.00693	2144.54	0.00385		3072.4	0.00304	3072.4	0.00339		2143.22	0.01306
3070.97	0.01	3070.97	0.0087		3070.97	0.00393	3070.97	0.00414		3070.97	0.01302	3070.97	0.01238		3070.97	0.01233	3070.97	0.00873		3070.97	0.01578	3070.97	0.00989		2141.68	0.00708	2141.68	0.00601		3070.97	0.0038	3070.97	0.004		2140.36	0.01358
3069.54	0.01029	3069.54	0.0092		3069.54	0.00458	3069.54	0.00413		3069.54	0.0135	3069.54	0.01253		3069.54	0.01296	3069.54	0.00868		3069.54	0.01617	3069.54	0.01015		2138.82	0.00577	2138.82	0.00646		3069.54	0.00623	3069.54	0.00587		2137.5	0.01432
3068.11	0.01045	3068.11	0.00942		3068.11	0.00534	3068.11	0.00397		3068.11	0.01349	3068.11	0.01206		3068.11	0.01359	3068.11	0.00867		3068.11	0.01684	3068.11	0.0103		2135.96	0.00418	2135.96	0.00452		3068.11	0.00971	3068.11	0.00855		2134.64	0.01525
3066.68	0.01046	3066.68	0.0093		3066.68	0.00605	3066.68	0.00369		3066.68	0.01298	3066.68	0.01104		3066.68	0.01423	3066.68	0.00876		3066.68	0.01761	3066.68	0.0103		2133.1	0.00368	2133.1	0.0023		3066.68	0.01331	3066.68	0.01131		2131.79	0.0163
3065.25	0.01029	3065.25	0.00887		3065.25	0.00651	3065.25	0.00335		3065.25	0.012	3065.25	0.00964		3065.25	0.01485	3065.25	0.00897		3065.25	0.01829	3065.25	0.01012		2130.25	0.0045	2130.25	0.00234		3065.25	0.01603	3065.25	0.01338		2128.93	0.01732
3063.82	0.00997	3063.82	0.00825		3063.82	0.00657	3063.82	0.00307		3063.82	0.0107	3063.82	0.00818		3063.82	0.01532	3063.82	0.00929		3063.82	0.01862	3063.82	0.0098		2127.39	0.00552	2127.39	0.00455		3063.82	0.01712	3063.82	0.01415		2126.07	0.0182
3062.39	0.00957	3062.39	0.00765		3062.39	0.00621	3062.39	0.00299		3062.39	0.00947	3062.39	0.00712		3062.39	0.01555	3062.39	0.00967		3062.39	0.01838	3062.39	0.00932		2124.53	0.00547	2124.53	0.00624		3062.39	0.01628	3062.39	0.0134		2123.21	0.01882
3060.96	0.0092	3060.96	0.0072		3060.96	0.00558	3060.96	0.0032		3060.96	0.00874	3060.96	0.00681		3060.96	0.01548	3060.96	0.00998		3060.96	0.0175	3060.96	0.00871		2121.67	0.00427	2121.67	0.0052		3060.96	0.01368	3060.96	0.01128		2120.36	0.01911
3059.53	0.00891	3059.53	0.00698		3059.53	0.00494	3059.53	0.00364		3059.53	0.00871	3059.53	0.00733		3059.53	0.01511	3059.53	0.01015		3059.53	0.01612	3059.53	0.00803		2118.81	0.00311	2118.81	0.0024		3059.53	0.00992	3059.53	0.00828		2117.5	0.01903
3058.1	0.00873	3058.1	0.00701		3058.1	0.00448	3058.1	0.00417		3058.1	0.00934	3058.1	0.00842		3058.1	0.01445	3058.1	0.01015		3058.1	0.01457	3058.1	0.00745		2115.95	0.00306	2115.95	0.00088		3058.1	0.00602	3058.1	0.00518		2114.64	0.01865
3056.67	0.0087	3056.67	0.00727		3056.67	0.00435	3056.67	0.00463		3056.67	0.01041	3056.67	0.00975		3056.67	0.0136	3056.67	0.01		3056.67	0.01327	3056.67	0.0072		2113.09	0.00404	2113.09	0.00219		3056.67	0.00314	3056.67	0.0029		2111.79	0.01806
3055.24	0.00885	3055.24	0.00768		3055.24	0.00466	3055.24	0.00488		3055.24	0.01161	3055.24	0.01092		3055.24	0.01273	3055.24	0.00978		3055.24	0.01252	3055.24	0.00739		2110.23	0.00496	2110.23	0.00468		3055.24	0.0022	3055.24	0.00215		2108.93	0.0174
3053.81	0.00917	3053.81	0.00819		3053.81	0.00532	3053.81	0.00487		3053.81	0.01266	3053.81	0.01162		3053.81	0.01202	3053.81	0.00953		3053.81	0.01243	3053.81	0.00787		2107.37	0.00486	2107.37	0.00544		3053.81	0.00343	3053.81	0.0031		2106.07	0.01675
3052.38	0.00959	3052.38	0.00866		3052.38	0.00611	3052.38	0.00461		3052.38	0.01327	3052.38	0.01168		3052.38	0.0116	3052.38	0.00929		3052.38	0.01291	3052.38	0.00837		2104.51	0.00401	2104.51	0.00367		3052.38	0.00635	3052.38	0.00534		2103.21	0.01618
3050.96	0.01	3050.96	0.00896		3050.96	0.00674	3050.96	0.0042		3050.96	0.0132	3050.96	0.01103		3050.96	0.01149	3050.96	0.00905		3050.96	0.0138	3050.96	0.00871		2101.65	0.0034	2101.65	0.00142		3050.96	0.01005	3050.96	0.00819		2100.36	0.01569
3049.53	0.01028	3049.53	0.00899		3049.53	0.00704	3049.53	0.00371		3049.53	0.01244	3049.53	0.0098		3049.53	0.01169	3049.53	0.00881		3049.53	0.01483	3049.53	0.00885		2098.79	0.00365	2098.79	0.00114		3049.53	0.01349	3049.53	0.0108		2097.5	0.01516
3048.1	0.01037	3048.1	0.00871		3048.1	0.00687	3048.1	0.00325		3048.1	0.01115	3048.1	0.00827		3048.1	0.0121	3048.1	0.00857		3048.1	0.01568	3048.1	0.00873		2095.93	0.00428	2095.93	0.00267		3048.1	0.01569	3048.1	0.01237		2094.64	0.01443
3046.67	0.01025	3046.67	0.00821		3046.67	0.00632	3046.67	0.00294		3046.67	0.00969	3046.67	0.00685		3046.67	0.01261	3046.67	0.00831		3046.67	0.01602	3046.67	0.00832		2093.07	0.00459	2093.07	0.00423		3046.67	0.01598	3046.67	0.01239		2091.79	0.01345
3045.24	0.00993	3045.24	0.00761		3045.24	0.00552	3045.24	0.00286		3045.24	0.00842	3045.24	0.0059		3045.24	0.01307	3045.24	0.00803		3045.24	0.01565	3045.24	0.00765		2090.21	0.00431	2090.21	0.00414		3045.24	0.0143	3045.24	0.01087		2088.93	0.01235
3043.81	0.00946	3043.81	0.00712		3043.81	0.00479	3043.81	0.0031		3043.81	0.00768	3043.81	0.00569		3043.81	0.01345	3043.81	0.00781		3043.81	0.01466	3043.81	0.00689		2087.35	0.00379	2087.35	0.00276		3043.81	0.0112	3043.81	0.00831		2086.07	0.01133
3042.38	0.00898	3042.38	0.00684		3042.38	0.00435	3042.38	0.00357		3042.38	0.0076	3042.38	0.00622		3042.38	0.01376	3042.38	0.00771		3042.38	0.01331	3042.38	0.00626		2084.5	0.00361	2084.5	0.00168		3042.38	0.0076	3042.38	0.00547		2083.21	0.01052
3040.95	0.0086	3040.95	0.00685		3040.95	0.00428	3040.95	0.00409		3040.95	0.00809	3040.95	0.00727		3040.95	0.01404	3040.95	0.00781		3040.95	0.01195	3040.95	0.00594		2081.64	0.00396	2081.64	0.00187		3040.95	0.00445	3040.95	0.00312		2080.36	0.00994
3039.52	0.00841	3039.52	0.0071		3039.52	0.0046	3039.52	0.00448		3039.52	0.00904	3039.52	0.00854		3039.52	0.01424	3039.52	0.0081		3039.52	0.0109	3039.52	0.00601		2078.78	0.00467	2078.78	0.00281		3039.52	0.00256	3039.52	0.00187		2077.5	0.0095
3038.09	0.00841	3038.09	0.00747		3038.09	0.00527	3038.09	0.00462		3038.09	0.01026	3038.09	0.00968		3038.09	0.01429	3038.09	0.00851		3038.09	0.01035	3038.09	0.00637		2075.92	0.0053	2075.92	0.00353		3038.09	0.00238	3038.09	0.00196		2074.64	0.00916
3036.66	0.00856	3036.66	0.00782		3036.66	0.00615	3036.66	0.00453		3036.66	0.0115	3036.66	0.01034		3036.66	0.01409	3036.66	0.00892		3036.66	0.01036	3036.66	0.00683		2073.06	0.00552	2073.06	0.00351		3036.66	0.00396	3036.66	0.00328		2071.79	0.00901
3035.23	0.00886	3035.23	0.00804		3035.23	0.007	3035.23	0.00429		3035.23	0.01241	3035.23	0.01032		3035.23	0.01366	3035.23	0.00924		3035.23	0.01092	3035.23	0.00722		2070.2	0.00549	2070.2	0.00289		3035.23	0.0069	3035.23	0.00545		2068.93	0.00915
3033.8	0.00932	3033.8	0.0081		3033.8	0.00756	3033.8	0.00398		3033.8	0.01274	3033.8	0.00966		3033.8	0.01315	3033.8	0.00947		3033.8	0.01197	3033.8	0.0075		2067.34	0.00576	2067.34	0.00219		3033.8	0.01044	3033.8	0.00788		2066.07	0.00956
3032.37	0.00988	3032.37	0.00802		3032.37	0.00763	3032.37	0.00367		3032.37	0.01238	3032.37	0.00856		3032.37	0.01274	3032.37	0.00961		3032.37	0.01337	3032.37	0.00771		2064.48	0.0065	2064.48	0.00192		3032.37	0.01358	3032.37	0.00993		2063.21	0.01004
3030.94	0.01042	3030.94	0.00785		3030.94	0.0072	3030.94	0.00345		3030.94	0.01145	3030.94	0.00733		3030.94	0.0125	3030.94	0.00964		3030.94	0.01479	3030.94	0.00784		2061.62	0.0075	2061.62	0.0024		3030.94	0.0154	3030.94	0.01102		2060.36	0.01041
3029.51	0.01078	3029.51	0.00764		3029.51	0.00647	3029.51	0.00338		3029.51	0.01023	3029.51	0.00625		3029.51	0.01241	3029.51	0.00952		3029.51	0.0158	3029.51	0.00784		2058.76	0.00846	2058.76	0.00354		3029.51	0.0154	3029.51	0.01085		2057.5	0.01058
3028.08	0.01089	3028.08	0.00746		3028.08	0.00575	3028.08	0.00354		3028.08	0.00907	3028.08	0.00564		3028.08	0.01249	3028.08	0.00926		3028.08	0.016	3028.08	0.00763		2055.9	0.0093	2055.9	0.00462		3028.08	0.01366	3028.08	0.00945		2054.64	0.01052
3026.65	0.01075	3026.65	0.00735		3026.65	0.00529	3026.65	0.00386		3026.65	0.0083	3026.65	0.00569		3026.65	0.01276	3026.65	0.00888		3026.65	0.01524	3026.65	0.00716		2053.04	0.01029	2053.04	0.0049		3026.65	0.01072	3026.65	0.00718		2051.79	0.01025
3025.22	0.01046	3025.22	0.00735		3025.22	0.00521	3025.22	0.00423		3025.22	0.00811	3025.22	0.00638		3025.22	0.01315	3025.22	0.00846		3025.22	0.01372	3025.22	0.00653		2050.18	0.01194	2050.18	0.00451		3025.22	0.00744	3025.22	0.00468		2048.93	0.00993
3023.79	0.01012	3023.79	0.00747		3023.79	0.00551	3023.79	0.0045		3023.79	0.00853	3023.79	0.00745		3023.79	0.01356	3023.79	0.00805		3023.79	0.01193	3023.79	0.00596		2047.32	0.01469	2047.32	0.00465		3023.79	0.00476	3023.79	0.00266		2046.07	0.00979
3022.36	0.00982	3022.36	0.00767		3022.36	0.00611	3022.36	0.00457		3022.36	0.00938	3022.36	0.00849		3022.36	0.01392	3022.36	0.00772		3022.36	0.01039	3022.36	0.00561		2044.46	0.01886	2044.46	0.00648		3022.36	0.00346	3022.36	0.0017		2043.21	0.0099
3020.93	0.00957	3020.93	0.00784		3020.93	0.00684	3020.93	0.00441		3020.93	0.01036	3020.93	0.00913		3020.93	0.01419	3020.93	0.00749		3020.93	0.00942	3020.93	0.00549		2041.6	0.02423	2041.6	0.00967		3020.93	0.00386	3020.93	0.00198		2040.36	0.01012
3019.5	0.00943	3019.5	0.00793		3019.5	0.00754	3019.5	0.00408		3019.5	0.01125	3019.5	0.00924		3019.5	0.01434	3019.5	0.00738		3019.5	0.00915	3019.5	0.00557		2038.74	0.02981	2038.74	0.01241		3019.5	0.00579	3019.5	0.00338		2037.5	0.01034
3018.07	0.00946	3018.07	0.00791		3018.07	0.00807	3018.07	0.00371		3018.07	0.01191	3018.07	0.00889		3018.07	0.01441	3018.07	0.00745		3018.07	0.00964	3018.07	0.00579		2035.89	0.03448	2035.89	0.01336		3018.07	0.00867	3018.07	0.00544		2034.64	0.01056
3016.64	0.00967	3016.64	0.00778		3016.64	0.00828	3016.64	0.00344		3016.64	0.01222	3016.64	0.00821		3016.64	0.01441	3016.64	0.00774		3016.64	0.01076	3016.64	0.00615		2033.03	0.03793	2033.03	0.01319		3016.64	0.01166	3016.64	0.00748		2031.78	0.01087
3015.21	0.01003	3015.21	0.00757		3015.21	0.00804	3015.21	0.00331		3015.21	0.01206	3015.21	0.00735		3015.21	0.01433	3015.21	0.00821		3015.21	0.01223	3015.21	0.00655		2030.17	0.04056	2030.17	0.01376		3015.21	0.01385	3015.21	0.00885		2028.93	0.01128
3013.78	0.01047	3013.78	0.00735		3013.78	0.00736	3013.78	0.0033		3013.78	0.01145	3013.78	0.00655		3013.78	0.01417	3013.78	0.00876		3013.78	0.01362	3013.78	0.00689		2027.31	0.04256	2027.31	0.01574		3013.78	0.01457	3013.78	0.00914		2026.07	0.01173
3012.35	0.01092	3012.35	0.00722		3012.35	0.00646	3012.35	0.00344		3012.35	0.01057	3012.35	0.00605		3012.35	0.01395	3012.35	0.00931		3012.35	0.01446	3012.35	0.00704		2024.45	0.04371	2024.45	0.01786		3012.35	0.01371	3012.35	0.00833		2023.21	0.01205
3010.92	0.01125	3010.92	0.00727		3010.92	0.00567	3010.92	0.00372		3010.92	0.00962	3010.92	0.00602		3010.92	0.01375	3010.92	0.00981		3010.92	0.01447	3010.92	0.00696		2021.59	0.04387	2021.59	0.01837		3010.92	0.01169	3010.92	0.00681		2020.36	0.01211
3009.49	0.01135	3009.49	0.00752		3009.49	0.00527	3009.49	0.00411		3009.49	0.00881	3009.49	0.00643		3009.49	0.01362	3009.49	0.01021		3009.49	0.01358	3009.49	0.0067		2018.73	0.04356	2018.73	0.01746		3009.49	0.0092	3009.49	0.00511		2017.5	0.01188
3008.06	0.01116	3008.06	0.00789		3008.06	0.00541	3008.06	0.00454		3008.06	0.00835	3008.06	0.00712		3008.06	0.0136	3008.06	0.01042		3008.06	0.01198	3008.06	0.00636		2015.87	0.0436	2015.87	0.01726		3008.06	0.00684	3008.06	0.00369		2014.64	0.01156
3006.63	0.01076	3006.63	0.00831		3006.63	0.00599	3006.63	0.00486		3006.63	0.00838	3006.63	0.00788		3006.63	0.01366	3006.63	0.01043		3006.63	0.01001	3006.63	0.00595		2013.01	0.04465	2013.01	0.01926		3006.63	0.0051	3006.63	0.00287		2011.78	0.01137
3005.21	0.01026	3005.21	0.00867		3005.21	0.00678	3005.21	0.00497		3005.21	0.00886	3005.21	0.00854		3005.21	0.01379	3005.21	0.01024		3005.21	0.00813	3005.21	0.00556		2010.15	0.04673	2010.15	0.02256		3005.21	0.00425	3005.21	0.0028		2008.93	0.01142
3003.78	0.00978	3003.78	0.00889		3003.78	0.00748	3003.78	0.00483		3003.78	0.0096	3003.78	0.00891		3003.78	0.01396	3003.78	0.00995		3003.78	0.00679	3003.78	0.00533		2007.29	0.0491	2007.29	0.0249		3003.78	0.00484	3003.78	0.00364		2006.07	0.01169
3002.35	0.00942	3002.35	0.00894		3002.35	0.00787	3002.35	0.00454		3002.35	0.01036	3002.35	0.0089		3002.35	0.01416	3002.35	0.00962		3002.35	0.00637	3002.35	0.00538		2004.43	0.05088	2004.43	0.02523		3002.35	0.00675	3002.35	0.00521		2003.21	0.01213
3000.92	0.00922	3000.92	0.00879		3000.92	0.00779	3000.92	0.00421		3000.92	0.01093	3000.92	0.00851		3000.92	0.01423	3000.92	0.00927		3000.92	0.00696	3000.92	0.00571		2001.57	0.05195	2001.57	0.02474		3000.92	0.00931	3000.92	0.00702		2000.36	0.01272
2999.49	0.00914	2999.49	0.00846		2999.49	0.00717	2999.49	0.00391		2999.49	0.01116	2999.49	0.00787		2999.49	0.01404	2999.49	0.00887		2999.49	0.00834	2999.49	0.00618		1998.71	0.05297	1998.71	0.02514		2999.49	0.01155	2999.49	0.00841		1997.5	0.01345
2998.06	0.00921	2998.06	0.00803		2998.06	0.00628	2998.06	0.00382		2998.06	0.01105	2998.06	0.00731		2998.06	0.01372	2998.06	0.00858		2998.06	0.01014	2998.06	0.00673		1995.85	0.05463	1995.85	0.02658		2998.06	0.0127	2998.06	0.00896		1994.64	0.01416
2996.63	0.00944	2996.63	0.00766		2996.63	0.00532	2996.63	0.00394		2996.63	0.01061	2996.63	0.00699		2996.63	0.01338	2996.63	0.0085		2996.63	0.01179	2996.63	0.00722		1992.99	0.05672	1992.99	0.02761		2996.63	0.01251	2996.63	0.00855		1991.78	0.01453
2995.2	0.0098	2995.2	0.00749		2995.2	0.00452	2995.2	0.00416		2995.2	0.00999	2995.2	0.00699		2995.2	0.0131	2995.2	0.00861		2995.2	0.01278	2995.2	0.00756		1990.14	0.05838	1990.14	0.02716		2995.2	0.01109	2995.2	0.00733		1988.93	0.01426
2993.77	0.01024	2993.77	0.00761		2993.77	0.00405	2993.77	0.00436		2993.77	0.00942	2993.77	0.00733		2993.77	0.01286	2993.77	0.00888		2993.77	0.0128	2993.77	0.00753		1987.28	0.05908	1987.28	0.02597		2993.77	0.00888	2993.77	0.00566		1986.07	0.01337
2992.34	0.01062	2992.34	0.00798		2992.34	0.0041	2992.34	0.00451		2992.34	0.00901	2992.34	0.0079		2992.34	0.01265	2992.34	0.00926		2992.34	0.01185	2992.34	0.00709		1984.42	0.05914	1984.42	0.02553		2992.34	0.00657	2992.34	0.004		1983.21	0.01223
2990.91	0.01087	2990.91	0.00854		2990.91	0.00475	2990.91	0.00461		2990.91	0.00888	2990.91	0.00854		2990.91	0.01261	2990.91	0.00978		2990.91	0.01022	2990.91	0.00637		1981.56	0.05919	1981.56	0.02605		2990.91	0.00478	2990.91	0.00293		1980.36	0.01122
2989.48	0.01096	2989.48	0.00912		2989.48	0.00583	2989.48	0.00471		2989.48	0.00905	2989.48	0.00907		2989.48	0.01276	2989.48	0.01036		2989.48	0.00832	2989.48	0.00556		1978.7	0.0596	1978.7	0.02646		2989.48	0.00392	2989.48	0.00271		1977.5	0.01056
2988.05	0.01084	2988.05	0.00953		2988.05	0.00699	2988.05	0.00477		2988.05	0.00947	2988.05	0.00929		2988.05	0.013	2988.05	0.01082		2988.05	0.00659	2988.05	0.00481		1975.84	0.05994	1975.84	0.02572		2988.05	0.00416	2988.05	0.00333		1974.64	0.01035
2986.62	0.01051	2986.62	0.00963		2986.62	0.00788	2986.62	0.00473		2986.62	0.00999	2986.62	0.0091		2986.62	0.01328	2986.62	0.01103		2986.62	0.00545	2986.62	0.00425		1972.98	0.0592	1972.98	0.02412		2986.62	0.00547	2986.62	0.00459		1971.78	0.01051
2985.19	0.01008	2985.19	0.00938		2985.19	0.00824	2985.19	0.00459		2985.19	0.01049	2985.19	0.00859		2985.19	0.01362	2985.19	0.011		2985.19	0.00523	2985.19	0.00404		1970.12	0.05662	1970.12	0.02273		2985.19	0.0075	2985.19	0.00612		1968.93	0.0109
2983.76	0.00972	2983.76	0.00885		2983.76	0.00802	2983.76	0.00439		2983.76	0.01091	2983.76	0.00798		2983.76	0.01404	2983.76	0.01078		2983.76	0.00603	2983.76	0.00424		1967.26	0.05275	1967.26	0.02191		2983.76	0.00961	2983.76	0.00741		1966.07	0.01133
2982.33	0.00954	2982.33	0.00816		2982.33	0.00729	2982.33	0.0042		2982.33	0.01124	2982.33	0.00751		2982.33	0.0145	2982.33	0.01046		2982.33	0.00767	2982.33	0.0048		1964.4	0.04938	1964.4	0.021		2982.33	0.01112	2982.33	0.00795		1963.21	0.01167
2980.9	0.00958	2980.9	0.0075		2980.9	0.00628	2980.9	0.00406		2980.9	0.0115	2980.9	0.00739		2980.9	0.01488	2980.9	0.01012		2980.9	0.00975	2980.9	0.00562		1961.54	0.04787	1961.54	0.01945		2980.9	0.01158	2980.9	0.00755		1960.35	0.01187
2979.47	0.00984	2979.47	0.00706		2979.47	0.00536	2979.47	0.00398		2979.47	0.01173	2979.47	0.00774		2979.47	0.01511	2979.47	0.00981		2979.47	0.01177	2979.47	0.00655		1958.68	0.04767	1958.68	0.01776		2979.47	0.01097	2979.47	0.00643		1957.5	0.01191
2978.04	0.01031	2978.04	0.00695		2978.04	0.00487	2978.04	0.00397		2978.04	0.012	2978.04	0.00852		2978.04	0.01511	2978.04	0.0095		2978.04	0.01324	2978.04	0.00734		1955.82	0.04713	1955.82	0.01693		2978.04	0.00957	2978.04	0.005		1954.64	0.01182
2976.61	0.01096	2976.61	0.00723		2976.61	0.005	2976.61	0.00406		2976.61	0.01236	2976.61	0.00957		2976.61	0.01486	2976.61	0.00917		2976.61	0.01378	2976.61	0.0077		1952.96	0.04549	1952.96	0.01703		2976.61	0.00781	2976.61	0.00367		1951.78	0.01168
2975.18	0.01167	2975.18	0.00782		2975.18	0.00573	2975.18	0.00422		2975.18	0.01284	2975.18	0.01064		2975.18	0.01442	2975.18	0.00885		2975.18	0.01318	2975.18	0.00742		1950.1	0.04357	1950.1	0.01717		2975.18	0.00621	2975.18	0.00276		1948.93	0.01166
2973.75	0.01233	2973.75	0.00864		2973.75	0.00688	2973.75	0.00446		2973.75	0.0134	2973.75	0.01152		2973.75	0.01393	2973.75	0.00867		2973.75	0.0116	2973.75	0.00657		1947.24	0.04242	1947.24	0.01651		2973.75	0.00532	2973.75	0.00253		1946.07	0.01184
2972.32	0.01284	2972.32	0.00948		2972.32	0.00817	2972.32	0.00476		2972.32	0.01402	2972.32	0.01209		2972.32	0.01355	2972.32	0.00872		2972.32	0.00959	2972.32	0.00543		1944.39	0.0422	1944.39	0.01536		2972.32	0.00544	2972.32	0.00308		1943.21	0.01213
2970.89	0.01314	2970.89	0.01013		2970.89	0.00934	2970.89	0.00508		2970.89	0.0147	2970.89	0.01238		2970.89	0.0133	2970.89	0.00897		2970.89	0.00781	2970.89	0.00442		1941.53	0.04197	1941.53	0.01471		2970.89	0.00652	2970.89	0.00429		1940.35	0.01244
2969.46	0.01326	2969.46	0.01044		2969.46	0.01017	2969.46	0.00541		2969.46	0.01554	2969.46	0.01254		2969.46	0.01317	2969.46	0.00932		2969.46	0.00678	2969.46	0.00384		1938.67	0.04079	1938.67	0.01484		2969.46	0.00826	2969.46	0.00583		1937.5	0.01278
2968.03	0.01324	2968.03	0.01039		2968.03	0.01051	2968.03	0.00572		2968.03	0.01652	2968.03	0.01274		2968.03	0.01315	2968.03	0.00965		2968.03	0.00689	2968.03	0.00393		1935.81	0.03875	1935.81	0.01495		2968.03	0.01027	2968.03	0.00725		1934.64	0.01324
2966.6	0.01317	2966.6	0.01007		2966.6	0.01027	2966.6	0.00592		2966.6	0.01756	2966.6	0.0131		2966.6	0.01328	2966.6	0.00992		2966.6	0.00827	2966.6	0.00476		1932.95	0.03678	1932.95	0.01444		2966.6	0.01209	2966.6	0.00807		1931.78	0.01377
2965.17	0.01311	2965.17	0.00957		2965.17	0.00954	2965.17	0.0059		2965.17	0.0185	2965.17	0.01362		2965.17	0.01366	2965.17	0.01011		2965.17	0.01063	2965.17	0.00617		1930.09	0.0358	1930.09	0.01365		2965.17	0.01314	2965.17	0.00799		1928.93	0.01423
2963.74	0.01311	2963.74	0.00903		2963.74	0.00859	2963.74	0.00567		2963.74	0.01932	2963.74	0.01434		2963.74	0.01435	2963.74	0.01032		2963.74	0.01341	2963.74	0.00784		1927.23	0.0359	1927.23	0.01327		2963.74	0.01297	2963.74	0.00706		1926.07	0.01458
2962.31	0.01322	2962.31	0.0086		2962.31	0.00783	2962.31	0.00538		2962.31	0.02001	2962.31	0.01528		2962.31	0.01531	2962.31	0.0106		2962.31	0.01598	2962.31	0.00945		1924.37	0.03656	1924.37	0.01366		2962.31	0.01171	2962.31	0.00564		1923.21	0.01476
2960.88	0.0135	2960.88	0.00845		2960.88	0.00757	2960.88	0.00517		2960.88	0.02056	2960.88	0.0163		2960.88	0.01642	2960.88	0.01096		2960.88	0.01783	2960.88	0.01063		1921.51	0.03735	1921.51	0.01463		2960.88	0.00999	2960.88	0.00429		1920.35	0.01473
2959.46	0.01396	2959.46	0.00867		2959.46	0.00787	2959.46	0.00511		2959.46	0.02087	2959.46	0.0171		2959.46	0.01749	2959.46	0.0113		2959.46	0.0185	2959.46	0.01103		1918.65	0.03897	1918.65	0.01589		2959.46	0.00852	2959.46	0.00348		1917.5	0.01448
2958.03	0.01449	2958.03	0.00923		2958.03	0.00862	2958.03	0.00513		2958.03	0.02082	2958.03	0.01733		2958.03	0.01832	2958.03	0.01151		2958.03	0.01774	2958.03	0.01045		1915.79	0.04243	1915.79	0.01772		2958.03	0.00774	2958.03	0.00338		1914.64	0.01422
2956.6	0.015	2956.6	0.00997		2956.6	0.00959	2956.6	0.00521		2956.6	0.02027	2956.6	0.01682		2956.6	0.01873	2956.6	0.01149		2956.6	0.01574	2956.6	0.00902		1912.93	0.04807	1912.93	0.02062		2956.6	0.00776	2956.6	0.00396		1911.78	0.0141
2955.17	0.0154	2955.17	0.01069		2955.17	0.01054	2955.17	0.00539		2955.17	0.01927	2955.17	0.01564		2955.17	0.0186	2955.17	0.01124		2955.17	0.01316	2955.17	0.00718		1910.07	0.0553	1910.07	0.02458		2955.17	0.00851	2955.17	0.00502		1908.93	0.01414
2953.74	0.0156	2953.74	0.01118		2953.74	0.01123	2953.74	0.0057		2953.74	0.01801	2953.74	0.01402		2953.74	0.01799	2953.74	0.01081		2953.74	0.01083	2953.74	0.00552		1907.21	0.06312	1907.21	0.02891		2953.74	0.00977	2953.74	0.0063		1906.07	0.01427
2952.31	0.01561	2952.31	0.01134		2952.31	0.01145	2952.31	0.00605		2952.31	0.01682	2952.31	0.01237		2952.31	0.01708	2952.31	0.01036		2952.31	0.00945	2952.31	0.00452		1904.35	0.07113	1904.35	0.03297		2952.31	0.01129	2952.31	0.00749		1903.21	0.01446
2950.88	0.01548	2950.88	0.01113		2950.88	0.01111	2950.88	0.00626		2950.88	0.01603	2950.88	0.01109		2950.88	0.01609	2950.88	0.00998		2950.88	0.0094	2950.88	0.00453		1901.49	0.07983	1901.49	0.03691		2950.88	0.01275	2950.88	0.00826		1900.35	0.01472
2949.45	0.01527	2949.45	0.01063		2949.45	0.01027	2949.45	0.00618		2949.45	0.01576	2949.45	0.01046		2949.45	0.0151	2949.45	0.00966		2949.45	0.01069	2949.45	0.0055		1898.63	0.08957	1898.63	0.0413		2949.45	0.01371	2949.45	0.00826		1897.5	0.01507
2948.02	0.01505	2948.02	0.01001		2948.02	0.00925	2948.02	0.00578		2948.02	0.01602	2948.02	0.01058		2948.02	0.01416	2948.02	0.00934		2948.02	0.01306	2948.02	0.0072		1895.78	0.09982	1895.78	0.04612		2948.02	0.01368	2948.02	0.00736		1894.64	0.01544
2946.59	0.01494	2946.59	0.00947		2946.59	0.00848	2946.59	0.00525		2946.59	0.01669	2946.59	0.01137		2946.59	0.01342	2946.59	0.00905		2946.59	0.01606	2946.59	0.00926		1892.92	0.10943	1892.92	0.05061		2946.59	0.01256	2946.59	0.00581		1891.78	0.01565
2945.16	0.01509	2945.16	0.00919		2945.16	0.00825	2945.16	0.00477		2945.16	0.01767	2945.16	0.01261		2945.16	0.01307	2945.16	0.00886		2945.16	0.019	2945.16	0.0112		1890.06	0.11788	1890.06	0.05415		2945.16	0.01084	2945.16	0.00418		1888.92	0.01554
2943.73	0.01549	2943.73	0.00922		2943.73	0.00858	2943.73	0.00449		2943.73	0.01881	2943.73	0.01403		2943.73	0.01325	2943.73	0.00887		2943.73	0.02121	2943.73	0.01258		1887.2	0.12581	1887.2	0.05704		2943.73	0.00935	2943.73	0.00308		1886.07	0.01515
2942.3	0.01607	2942.3	0.00954		2942.3	0.00941	2942.3	0.00449		2942.3	0.01999	2942.3	0.01528		2942.3	0.014	2942.3	0.00912		2942.3	0.02226	2942.3	0.01306		1884.34	0.13408	1884.34	0.05992		2942.3	0.00871	2942.3	0.00293		1883.21	0.01476
2940.87	0.01678	2940.87	0.01009		2940.87	0.01065	2940.87	0.00485		2940.87	0.02099	2940.87	0.01603		2940.87	0.0153	2940.87	0.00963		2940.87	0.02207	2940.87	0.01253		1881.48	0.14259	1881.48	0.0628		2940.87	0.0091	2940.87	0.00377		1880.35	0.01462
2939.44	0.0176	2939.44	0.01085		2939.44	0.01213	2939.44	0.00552		2939.44	0.02155	2939.44	0.01611		2939.44	0.01697	2939.44	0.01034		2939.44	0.02086	2939.44	0.0112		1878.62	0.15011	1878.62	0.06501		2939.44	0.0104	2939.44	0.0053		1877.5	0.01487
2938.01	0.01848	2938.01	0.0117		2938.01	0.01354	2938.01	0.00639		2938.01	0.02158	2938.01	0.0156		2938.01	0.0188	2938.01	0.01114		2938.01	0.0191	2938.01	0.00957		1875.76	0.15495	1875.76	0.06594		2938.01	0.01231	2938.01	0.00721		1874.64	0.0156
2936.58	0.01928	2936.58	0.01245		2936.58	0.0145	2936.58	0.00722		2936.58	0.02127	2936.58	0.01483		2936.58	0.02053	2936.58	0.01189		2936.58	0.01743	2936.58	0.00825		1872.9	0.15586	1872.9	0.06561		2936.58	0.01445	2936.58	0.00904		1871.78	0.01677
2935.15	0.01991	2935.15	0.01293		2935.15	0.01482	2935.15	0.00779		2935.15	0.02098	2935.15	0.01422		2935.15	0.02191	2935.15	0.01246		2935.15	0.01647	2935.15	0.00772		1870.04	0.15263	1870.04	0.06444		2935.15	0.01636	2935.15	0.01031		1868.92	0.01795
2933.72	0.02032	2933.72	0.01305		2933.72	0.01451	2933.72	0.0079		2933.72	0.02105	2933.72	0.0141		2933.72	0.02281	2933.72	0.01276		2933.72	0.01662	2933.72	0.00821		1867.18	0.14636	1867.18	0.06252		2933.72	0.01757	2933.72	0.01063		1866.07	0.01859
2932.29	0.02056	2932.29	0.01286		2932.29	0.0138	2932.29	0.0075		2932.29	0.02165	2932.29	0.01461		2932.29	0.02315	2932.29	0.01277		2932.29	0.018	2932.29	0.00964		1864.32	0.13821	1864.32	0.05927		2932.29	0.01776	2932.29	0.00983		1863.21	0.01855
2930.86	0.02073	2930.86	0.01252		2930.86	0.01302	2930.86	0.00673		2930.86	0.02277	2930.86	0.01572		2930.86	0.023	2930.86	0.01258		2930.86	0.02049	2930.86	0.01174		1861.46	0.12756	1861.46	0.05405		2930.86	0.01694	2930.86	0.00818		1860.35	0.01817
2929.43	0.02096	2929.43	0.01222		2929.43	0.01251	2929.43	0.00586		2929.43	0.02431	2929.43	0.01724		2929.43	0.02248	2929.43	0.0123		2929.43	0.02366	2929.43	0.01406		1858.6	0.11353	1858.6	0.04716		2929.43	0.0155	2929.43	0.00627		1857.5	0.01769
2928	0.0213	2928	0.01206		2928	0.01251	2928	0.00517		2928	0.02613	2928	0.0189		2928	0.02168	2928	0.01196		2928	0.02684	2928	0.01608		1855.74	0.09765	1855.74	0.03973		2928	0.01403	2928	0.00473		1854.64	0.0172
2926.57	0.02171	2926.57	0.01209		2926.57	0.01313	2926.57	0.00484		2926.57	0.02798	2926.57	0.02033		2926.57	0.02064	2926.57	0.0115		2926.57	0.02923	2926.57	0.01723		1852.88	0.08293	1852.88	0.03286		2926.57	0.0131	2926.57	0.00398		1851.78	0.01694
2925.14	0.02211	2925.14	0.01223		2925.14	0.01427	2925.14	0.00498		2925.14	0.02944	2925.14	0.0212		2925.14	0.01942	2925.14	0.01087		2925.14	0.03016	2925.14	0.01715		1850.03	0.07079	1850.03	0.02682		2925.14	0.01311	2925.14	0.00423		1848.92	0.01707
2923.71	0.0224	2923.71	0.01243		2923.71	0.01562	2923.71	0.00552		2923.71	0.0301	2923.71	0.02125		2923.71	0.01824	2923.71	0.0101		2923.71	0.02938	2923.71	0.01581		1847.17	0.06039	1847.17	0.02138		2923.71	0.01421	2923.71	0.00546		1846.07	0.01746
2922.28	0.0226	2922.28	0.01263		2922.28	0.0168	2922.28	0.00631		2922.28	0.02974	2922.28	0.02046		2922.28	0.01736	2922.28	0.00932		2922.28	0.02719	2922.28	0.01356		1844.31	0.05081	1844.31	0.01688		2922.28	0.01614	2922.28	0.00736		1843.21	0.01783
2920.85	0.02266	2920.85	0.01277		2920.85	0.01751	2920.85	0.00706		2920.85	0.02843	2920.85	0.01903		2920.85	0.01696	2920.85	0.00865		2920.85	0.02422	2920.85	0.011		1841.45	0.04301	1841.45	0.01392		2920.85	0.01833	2920.85	0.00931		1840.35	0.01814
2919.42	0.02253	2919.42	0.01275		2919.42	0.01758	2919.42	0.00751		2919.42	0.02647	2919.42	0.01728		2919.42	0.0171	2919.42	0.00828		2919.42	0.02125	2919.42	0.0088		1838.59	0.03835	1838.59	0.01231		2919.42	0.0201	2919.42	0.0107		1837.5	0.01869
2917.99	0.02213	2917.99	0.01249		2917.99	0.01692	2917.99	0.00754		2917.99	0.02425	2917.99	0.01561		2917.99	0.0177	2917.99	0.0083		2917.99	0.01894	2917.99	0.00754		1835.73	0.03683	1835.73	0.01124		2917.99	0.0209	2917.99	0.01112		1834.64	0.01971
2916.56	0.02139	2916.56	0.012		2916.56	0.01555	2916.56	0.0071		2916.56	0.02217	2916.56	0.01436		2916.56	0.01858	2916.56	0.00873		2916.56	0.01773	2916.56	0.0075		1832.87	0.03745	1832.87	0.01044		2916.56	0.0204	2916.56	0.01045		1831.78	0.021
2915.13	0.02034	2915.13	0.01133		2915.13	0.01366	2915.13	0.00624		2915.13	0.02054	2915.13	0.01372		2915.13	0.01949	2915.13	0.00941		2915.13	0.0178	2915.13	0.00861		1830.01	0.03879	1830.01	0.01047		2915.13	0.01856	2915.13	0.00883		1828.92	0.02194
2913.71	0.01908	2913.71	0.01061		2913.71	0.01167	2913.71	0.00511		2913.71	0.01951	2913.71	0.01364		2913.71	0.02022	2913.71	0.01016		2913.71	0.01901	2913.71	0.01046		1827.15	0.03965	1827.15	0.01187		2913.71	0.01573	2913.71	0.00663		1826.07	0.02201
2912.28	0.01781	2912.28	0.00996		2912.28	0.01007	2912.28	0.00402		2912.28	0.01913	2912.28	0.01393		2912.28	0.02064	2912.28	0.01083		2912.28	0.0209	2912.28	0.01245		1824.29	0.04034	1824.29	0.01375		2912.28	0.01261	2912.28	0.00443		1823.21	0.02131
2910.85	0.01671	2910.85	0.00949		2910.85	0.00922	2910.85	0.00335		2910.85	0.01934	2910.85	0.01439		2910.85	0.02071	2910.85	0.01136		2910.85	0.02282	2910.85	0.01394		1821.43	0.04222	1821.43	0.01488		2910.85	0.00997	2910.85	0.00286		1820.35	0.02043
2909.42	0.01585	2909.42	0.00925		2909.42	0.00919	2909.42	0.00333		2909.42	0.01991	2909.42	0.0148		2909.42	0.02041	2909.42	0.01174		2909.42	0.02402	2909.42	0.01443		1818.57	0.04566	1818.57	0.01525		2909.42	0.00843	2909.42	0.0024		1817.49	0.01988
2907.99	0.01521	2907.99	0.00925		2907.99	0.00975	2907.99	0.00393		2907.99	0.02039	2907.99	0.01492		2907.99	0.01969	2907.99	0.01191		2907.99	0.02389	2907.99	0.0137		1815.71	0.04982	1815.71	0.01601		2907.99	0.0083	2907.99	0.0032		1814.64	0.01978
2906.56	0.01473	2906.56	0.00939		2906.56	0.01052	2906.56	0.00491		2906.56	0.02032	2906.56	0.01453		2906.56	0.0185	2906.56	0.01178		2906.56	0.02222	2906.56	0.01192		1812.85	0.05342	1812.85	0.01814		2906.56	0.00949	2906.56	0.00505		1811.78	0.01998
2905.13	0.01433	2905.13	0.00957		2905.13	0.01115	2905.13	0.00598		2905.13	0.01946	2905.13	0.0136		2905.13	0.01688	2905.13	0.01131		2905.13	0.01937	2905.13	0.00958		1809.99	0.05585	1809.99	0.02113		2905.13	0.01157	2905.13	0.00749		1808.92	0.02029
2903.7	0.014	2903.7	0.00969		2903.7	0.01138	2903.7	0.00684		2903.7	0.01789	2903.7	0.01235		2903.7	0.01495	2903.7	0.01053		2903.7	0.01601	2903.7	0.0073		1807.13	0.05764	1807.13	0.02337		2903.7	0.01388	2903.7	0.0099		1806.07	0.02082
2902.27	0.0137	2902.27	0.00969		2902.27	0.01105	2902.27	0.00724		2902.27	0.01584	2902.27	0.01104		2902.27	0.0129	2902.27	0.00953		2902.27	0.01289	2902.27	0.00565		1804.27	0.05987	1804.27	0.02394		2902.27	0.01568	2902.27	0.01163		1803.21	0.0218
2900.84	0.01339	2900.84	0.0095		2900.84	0.01013	2900.84	0.00699		2900.84	0.01366	2900.84	0.00993		2900.84	0.01097	2900.84	0.00844		2900.84	0.01065	2900.84	0.00501		1801.42	0.06304	1801.42	0.02372		2900.84	0.01628	2900.84	0.01208		1800.35	0.02311
2899.41	0.01301	2899.41	0.00913		2899.41	0.00877	2899.41	0.00611		2899.41	0.01177	2899.41	0.00921		2899.41	0.00941	2899.41	0.00741		2899.41	0.00972	2899.41	0.00546		1798.56	0.06637	1798.56	0.02437		2899.41	0.01533	2899.41	0.01101		1797.49	0.02432
2897.98	0.01255	2897.98	0.00864		2897.98	0.00733	2897.98	0.0049		2897.98	0.01061	2897.98	0.009		2897.98	0.00845	2897.98	0.00661		2897.98	0.01025	2897.98	0.00684		1795.7	0.06868	1795.7	0.02607		2897.98	0.01304	2897.98	0.00866		1794.64	0.02497
2896.55	0.01204	2896.55	0.00817		2896.55	0.00621	2896.55	0.00378		2896.55	0.01042	2896.55	0.00929		2896.55	0.00824	2896.55	0.00623		2896.55	0.01206	2896.55	0.00873		1792.84	0.06961	1792.84	0.02734		2896.55	0.0101	2896.55	0.00581		1791.78	0.02495
2895.12	0.01161	2895.12	0.00787		2895.12	0.00569	2895.12	0.00314		2895.12	0.01114	2895.12	0.0099		2895.12	0.00886	2895.12	0.00638		2895.12	0.0146	2895.12	0.0106		1789.98	0.06963	1789.98	0.02688		2895.12	0.00733	2895.12	0.00338		1788.92	0.02452
2893.69	0.01132	2893.69	0.00781		2893.69	0.00578	2893.69	0.0031		2893.69	0.01244	2893.69	0.01059		2893.69	0.01019	2893.69	0.0071		2893.69	0.01712	2893.69	0.01187		1787.12	0.06903	1787.12	0.02504		2893.69	0.00542	2893.69	0.00208		1786.07	0.02414
2892.26	0.01118	2892.26	0.00794		2892.26	0.00635	2892.26	0.00364		2892.26	0.01389	2892.26	0.01116		2892.26	0.0119	2892.26	0.00818		2892.26	0.01877	2892.26	0.01212		1784.26	0.06755	1784.26	0.02327		2892.26	0.00479	2892.26	0.0022		1783.21	0.02413
2890.83	0.01111	2890.83	0.00817		2890.83	0.00726	2890.83	0.00459		2890.83	0.01504	2890.83	0.01145		2890.83	0.01361	2890.83	0.00938		2890.83	0.01901	2890.83	0.01126		1781.4	0.06492	1781.4	0.02248		2890.83	0.00554	2890.83	0.00357		1780.35	0.02461
2889.4	0.01103	2889.4	0.00842		2889.4	0.00824	2889.4	0.00569		2889.4	0.01553	2889.4	0.01137		2889.4	0.01502	2889.4	0.01045		2889.4	0.01777	2889.4	0.0096		1778.54	0.0613	1778.54	0.02203		2889.4	0.00752	2889.4	0.00586		1777.49	0.0256
2887.97	0.01091	2887.97	0.00861		2887.97	0.00894	2887.97	0.00661		2887.97	0.01512	2887.97	0.0109		2887.97	0.01597	2887.97	0.01132		2887.97	0.01539	2887.97	0.00759		1775.68	0.05689	1775.68	0.02007		2887.97	0.01031	2887.97	0.00851		1774.64	0.02697
2886.54	0.01077	2886.54	0.00869		2886.54	0.00908	2886.54	0.00706		2886.54	0.01382	2886.54	0.01014		2886.54	0.01637	2886.54	0.01191		2886.54	0.01245	2886.54	0.00575		1772.82	0.05164	1772.82	0.01579		2886.54	0.0131	2886.54	0.01085		1771.78	0.02825
2885.11	0.01067	2885.11	0.00861		2885.11	0.00862	2885.11	0.00691		2885.11	0.01196	2885.11	0.00927		2885.11	0.0162	2885.11	0.01216		2885.11	0.0096	2885.11	0.00453		1769.96	0.04607	1769.96	0.01119		2885.11	0.01496	2885.11	0.01217		1768.92	0.02897
2883.68	0.01064	2883.68	0.00838		2883.68	0.00768	2883.68	0.00624		2883.68	0.01004	2883.68	0.00855		2883.68	0.01543	2883.68	0.012		2883.68	0.00758	2883.68	0.00427		1767.1	0.04107	1767.1	0.00867		2883.68	0.01519	2883.68	0.01199		1766.07	0.02928
2882.25	0.01063	2882.25	0.00803		2882.25	0.00651	2882.25	0.00526		2882.25	0.00856	2882.25	0.0081		2882.25	0.01414	2882.25	0.0114		2882.25	0.00696	2882.25	0.00504		1764.24	0.03664	1764.24	0.00792		2882.25	0.0137	2882.25	0.01031		1763.21	0.02965
2880.82	0.0106	2880.82	0.00764		2880.82	0.00546	2880.82	0.00425		2880.82	0.00787	2880.82	0.008		2880.82	0.01249	2880.82	0.01042		2880.82	0.00791	2880.82	0.0066		1761.38	0.03265	1761.38	0.00746		2880.82	0.01097	2880.82	0.00764		1760.35	0.03018
2879.39	0.01055	2879.39	0.00732		2879.39	0.00484	2879.39	0.0035		2879.39	0.00815	2879.39	0.00825		2879.39	0.0107	2879.39	0.00917		2879.39	0.01017	2879.39	0.00848		1758.52	0.02985	1758.52	0.00625		2879.39	0.00781	2879.39	0.00475		1757.49	0.03077
2877.96	0.01057	2877.96	0.00718		2877.96	0.00486	2877.96	0.00319		2877.96	0.00935	2877.96	0.0088		2877.96	0.00901	2877.96	0.0078		2877.96	0.01307	2877.96	0.01011		1755.67	0.02896	1755.67	0.00443		2877.96	0.00507	2877.96	0.00241		1754.64	0.03164
2876.53	0.01074	2876.53	0.00727		2876.53	0.00553	2876.53	0.00338		2876.53	0.01125	2876.53	0.00954		2876.53	0.00767	2876.53	0.00651		2876.53	0.01581	2876.53	0.01102		1752.81	0.0295	1752.81	0.00291		2876.53	0.00345	2876.53	0.00119		1751.78	0.03307
2875.1	0.01107	2875.1	0.00759		2875.1	0.00667	2875.1	0.00403		2875.1	0.01341	2875.1	0.01033		2875.1	0.00693	2875.1	0.00554		2875.1	0.01767	2875.1	0.01101		1749.95	0.03032	1749.95	0.00272		2875.1	0.00348	2875.1	0.00141		1748.92	0.03484
2873.67	0.01151	2873.67	0.00806		2873.67	0.00799	2873.67	0.00493		2873.67	0.0153	2873.67	0.01105		2873.67	0.007	2873.67	0.00509		2873.67	0.01821	2873.67	0.01018		1747.09	0.03051	1747.09	0.00368		2873.67	0.00527	2873.67	0.00306		1746.06	0.03638
2872.24	0.01195	2872.24	0.00857		2872.24	0.00915	2872.24	0.00578		2872.24	0.01643	2872.24	0.01153		2872.24	0.00792	2872.24	0.0053		2872.24	0.0174	2872.24	0.00887		1744.23	0.03041	1744.23	0.00439		2872.24	0.00846	2872.24	0.00579		1743.21	0.03758
2870.81	0.01232	2870.81	0.00901		2870.81	0.00987	2870.81	0.00632		2870.81	0.01653	2870.81	0.01168		2870.81	0.00954	2870.81	0.00611		2870.81	0.0155	2870.81	0.00745		1741.37	0.03098	1741.37	0.00395		2870.81	0.01216	2870.81	0.00885		1740.35	0.03888
2869.38	0.0126	2869.38	0.00929		2869.38	0.01003	2869.38	0.00644		2869.38	0.01569	2869.38	0.01149		2869.38	0.01156	2869.38	0.00734		2869.38	0.01302	2869.38	0.00624		1738.51	0.03243	1738.51	0.00287		2869.38	0.0153	2869.38	0.0113		1737.49	0.04061
2867.96	0.01286	2867.96	0.00936		2867.96	0.00965	2867.96	0.00614		2867.96	0.01427	2867.96	0.01107		2867.96	0.01364	2867.96	0.00874		2867.96	0.01063	2867.96	0.00549		1735.65	0.03452	1735.65	0.0023		2867.96	0.01702	2867.96	0.01237		1734.64	0.04246
2866.53	0.01312	2866.53	0.00923		2866.53	0.00888	2866.53	0.00554		2866.53	0.0127	2866.53	0.01055		2866.53	0.01551	2866.53	0.01013		2866.53	0.00902	2866.53	0.00542		1732.79	0.03687	1732.79	0.00308		2866.53	0.01689	2866.53	0.01173		1731.78	0.04364
2865.1	0.01336	2865.1	0.00895		2865.1	0.00798	2865.1	0.00481		2865.1	0.01147	2865.1	0.01004		2865.1	0.017	2865.1	0.01135		2865.1	0.00865	2865.1	0.00608		1729.93	0.03898	1729.93	0.00471		2865.1	0.01504	2865.1	0.00963		1728.92	0.04394
2863.67	0.01355	2863.67	0.00862		2863.67	0.00734	2863.67	0.0042		2863.67	0.01096	2863.67	0.00974		2863.67	0.018	2863.67	0.01226		2863.67	0.00964	2863.67	0.00731		1727.07	0.04078	1727.07	0.0059		2863.67	0.01206	2863.67	0.00675		1726.06	0.04412
2862.24	0.0137	2862.24	0.00836		2862.24	0.00724	2862.24	0.00389		2862.24	0.01144	2862.24	0.00981		2862.24	0.01835	2862.24	0.01272		2862.24	0.01181	2862.24	0.00881		1724.21	0.04268	1724.21	0.00611		2862.24	0.00883	2862.24	0.00393		1723.21	0.04501
2860.81	0.01387	2860.81	0.00832		2860.81	0.00771	2860.81	0.00397		2860.81	0.01283	2860.81	0.01029		2860.81	0.01795	2860.81	0.01266		2860.81	0.01467	2860.81	0.01018		1721.35	0.0453	1721.35	0.00578		2860.81	0.00626	2860.81	0.00195		1720.35	0.04684
2859.38	0.01411	2859.38	0.0086		2859.38	0.0086	2859.38	0.0044		2859.38	0.01483	2859.38	0.01112		2859.38	0.01686	2859.38	0.01209		2859.38	0.01752	2859.38	0.01114		1718.49	0.04931	1718.49	0.00621		2859.38	0.0051	2859.38	0.00134		1717.49	0.04898
2857.95	0.01442	2857.95	0.00918		2857.95	0.00972	2857.95	0.00507		2857.95	0.01696	2857.95	0.01213		2857.95	0.01528	2857.95	0.0111		2857.95	0.01956	2857.95	0.01155		1715.63	0.05424	1715.63	0.00857		2857.95	0.0057	2857.95	0.00231		1714.64	0.05043
2856.52	0.01475	2856.52	0.00993		2856.52	0.01082	2856.52	0.00584		2856.52	0.01874	2856.52	0.01314		2856.52	0.0135	2856.52	0.00985		2856.52	0.0202	2856.52	0.01137		1712.77	0.05839	1712.77	0.01173		2856.52	0.00793	2856.52	0.00461		1711.78	0.05113
2855.09	0.01505	2855.09	0.01066		2855.09	0.01158	2855.09	0.00651		2855.09	0.01976	2855.09	0.01398		2855.09	0.0118	2855.09	0.00848		2855.09	0.01934	2855.09	0.0107		1709.92	0.06162	1709.92	0.01369		2855.09	0.01119	2855.09	0.00762		1708.92	0.0519
2853.66	0.01525	2853.66	0.01119		2853.66	0.01179	2853.66	0.00692		2853.66	0.01982	2853.66	0.01445		2853.66	0.01043	2853.66	0.00719		2853.66	0.01727	2853.66	0.00968		1707.06	0.06494	1707.06	0.01417		2853.66	0.01462	2853.66	0.0105		1706.06	0.05323
2852.23	0.01529	2852.23	0.01136		2852.23	0.0114	2852.23	0.00696		2852.23	0.01892	2852.23	0.01443		2852.23	0.00957	2852.23	0.00618		2852.23	0.01453	2852.23	0.00855		1704.2	0.06921	1704.2	0.01429		2852.23	0.01733	2852.23	0.01244		1703.21	0.05482
2850.8	0.01517	2850.8	0.01109		2850.8	0.01055	2850.8	0.00662		2850.8	0.01727	2850.8	0.01386		2850.8	0.00933	2850.8	0.00563		2850.8	0.01179	2850.8	0.00756		1701.34	0.0755	1701.34	0.01588		2850.8	0.01853	2850.8	0.01285		1700.35	0.05583
2849.37	0.01485	2849.37	0.01044		2849.37	0.00943	2849.37	0.006		2849.37	0.01518	2849.37	0.01279		2849.37	0.00968	2849.37	0.00566		2849.37	0.00969	2849.37	0.00695		1698.48	0.08408	1698.48	0.01995		2849.37	0.01777	2849.37	0.0116		1697.49	0.05544
2847.94	0.01433	2847.94	0.00952		2847.94	0.00825	2847.94	0.00532		2847.94	0.01309	2847.94	0.01145		2847.94	0.01048	2847.94	0.00625		2847.94	0.00867	2847.94	0.00688		1695.62	0.09229	1695.62	0.02491		2847.94	0.01514	2847.94	0.0091		1694.64	0.05394
2846.51	0.01357	2846.51	0.00854		2846.51	0.00727	2846.51	0.00476		2846.51	0.01137	2846.51	0.0101		2846.51	0.01151	2846.51	0.00733		2846.51	0.00885	2846.51	0.00731		1692.76	0.09761	1692.76	0.02786		2846.51	0.01134	2846.51	0.00613		1691.78	0.05251
2845.08	0.01265	2845.08	0.00772		2845.08	0.00676	2845.08	0.00443		2845.08	0.01027	2845.08	0.00895		2845.08	0.01258	2845.08	0.00865		2845.08	0.01006	2845.08	0.00806		1689.9	0.10059	1689.9	0.02856		2845.08	0.00742	2845.08	0.00351		1688.92	0.05182
2843.65	0.01177	2843.65	0.0072		2843.65	0.00682	2843.65	0.00431		2843.65	0.0099	2843.65	0.00818		2843.65	0.01353	2843.65	0.00993		2843.65	0.01187	2843.65	0.00881		1687.04	0.10201	1687.04	0.02854		2843.65	0.00449	2843.65	0.00184		1686.06	0.05177
2842.22	0.0111	2842.22	0.00707		2842.22	0.00731	2842.22	0.0044		2842.22	0.01027	2842.22	0.00789		2842.22	0.01421	2842.22	0.01091		2842.22	0.0137	2842.22	0.00933		1684.18	0.10149	1684.18	0.02905		2842.22	0.00328	2842.22	0.00146		1683.21	0.05196
2840.79	0.01068	2840.79	0.00728		2840.79	0.00793	2840.79	0.00469		2840.79	0.01115	2840.79	0.00809		2840.79	0.01454	2840.79	0.01152		2840.79	0.01492	2840.79	0.00948		1681.32	0.09891	1681.32	0.0298		2840.79	0.00394	2840.79	0.00243		1680.35	0.05224
2839.36	0.01046	2839.36	0.00772		2839.36	0.0084	2839.36	0.00511		2839.36	0.01212	2839.36	0.00864		2839.36	0.01445	2839.36	0.01172		2839.36	0.01513	2839.36	0.00924		1678.46	0.09522	1678.46	0.02925		2839.36	0.00615	2839.36	0.00442		1677.49	0.05301
2837.93	0.0103	2837.93	0.00821		2837.93	0.00855	2837.93	0.00557		2837.93	0.01266	2837.93	0.00927		2837.93	0.01391	2837.93	0.01149		2837.93	0.01416	2837.93	0.00867		1675.6	0.09067	1675.6	0.02687		2837.93	0.00925	2837.93	0.00699		1674.63	0.05458
2836.5	0.01016	2836.5	0.00856		2836.5	0.00829	2836.5	0.00596		2836.5	0.01249	2836.5	0.00969		2836.5	0.01289	2836.5	0.01077		2836.5	0.01214	2836.5	0.00786		1672.74	0.08539	1672.74	0.02359		2836.5	0.01236	2836.5	0.00946		1671.78	0.0566
2835.07	0.01001	2835.07	0.00865		2835.07	0.00762	2835.07	0.00611		2835.07	0.01164	2835.07	0.00971		2835.07	0.01148	2835.07	0.00961		2835.07	0.00953	2835.07	0.00697		1669.88	0.08028	1669.88	0.02089		2835.07	0.01455	2835.07	0.01109		1668.92	0.05838
2833.64	0.00986	2833.64	0.00841		2833.64	0.00664	2833.64	0.00595		2833.64	0.01033	2833.64	0.00924		2833.64	0.0099	2833.64	0.00818		2833.64	0.00695	2833.64	0.00615		1667.02	0.07591	1667.02	0.01941		2833.64	0.01507	2833.64	0.0113		1666.06	0.0597
2832.21	0.00972	2832.21	0.0079		2832.21	0.00562	2832.21	0.00552		2832.21	0.00887	2832.21	0.00838		2832.21	0.00841	2832.21	0.00674		2832.21	0.00509	2832.21	0.00563		1664.16	0.07197	1664.16	0.01834		2832.21	0.01366	2832.21	0.00997		1663.21	0.061
2830.78	0.00959	2830.78	0.00724		2830.78	0.0049	2830.78	0.00495		2830.78	0.00758	2830.78	0.00737		2830.78	0.00722	2830.78	0.00557		2830.78	0.00439	2830.78	0.00551		1661.31	0.06855	1661.31	0.01706		2830.78	0.01068	2830.78	0.00751		1660.35	0.06257
2829.35	0.00948	2829.35	0.00661		2829.35	0.00468	2829.35	0.00437		2829.35	0.00674	2829.35	0.00645		2829.35	0.00646	2829.35	0.00483		2829.35	0.00499	2829.35	0.00582		1658.45	0.06613	1658.45	0.01563		2829.35	0.00707	2829.35	0.00467		1657.49	0.06449
2827.92	0.00938	2827.92	0.00617		2827.92	0.00497	2827.92	0.00393		2827.92	0.0065	2827.92	0.00585		2827.92	0.00619	2827.92	0.00458		2827.92	0.00673	2827.92	0.00649		1655.59	0.06507	1655.59	0.01434		2827.92	0.0039	2827.92	0.00228		1654.63	0.06671
2826.49	0.00933	2826.49	0.00606		2826.49	0.00563	2826.49	0.00374		2826.49	0.00687	2826.49	0.00571		2826.49	0.00641	2826.49	0.00484		2826.49	0.00912	2826.49	0.00741		1652.73	0.06547	1652.73	0.01397		2826.49	0.00202	2826.49	0.00094		1651.78	0.06873
2825.06	0.00932	2825.06	0.00631		2825.06	0.00646	2825.06	0.00387		2825.06	0.00771	2825.06	0.00604		2825.06	0.00711	2825.06	0.0056		2825.06	0.0115	2825.06	0.00839		1649.87	0.06724	1649.87	0.01485		2825.06	0.00182	2825.06	0.00092		1648.92	0.06962
2823.63	0.0094	2823.63	0.00686		2823.63	0.00724	2823.63	0.00433		2823.63	0.00879	2823.63	0.00674		2823.63	0.00822	2823.63	0.00679		2823.63	0.01326	2823.63	0.0092		1647.01	0.07015	1647.01	0.01637		2823.63	0.00327	2823.63	0.00217		1646.06	0.06933
2822.21	0.00955	2822.21	0.00758		2822.21	0.00774	2822.21	0.00498		2822.21	0.00983	2822.21	0.00763		2822.21	0.00956	2822.21	0.00819		2822.21	0.01394	2822.21	0.00962		1644.15	0.07409	1644.15	0.01817		2822.21	0.00602	2822.21	0.00432		1643.21	0.06883
2820.78	0.00973	2820.78	0.00825		2820.78	0.00781	2820.78	0.00563		2820.78	0.01058	2820.78	0.00847		2820.78	0.01088	2820.78	0.00951		2820.78	0.01337	2820.78	0.00953		1641.29	0.07921	1641.29	0.01984		2820.78	0.0094	2820.78	0.00679		1640.35	0.06882
2819.35	0.00984	2819.35	0.00868		2819.35	0.00745	2819.35	0.0061		2819.35	0.01089	2819.35	0.00905		2819.35	0.01196	2819.35	0.01054		2819.35	0.01172	2819.35	0.00897		1638.43	0.0862	1638.43	0.02131		2819.35	0.0125	2819.35	0.00888		1637.49	0.06926
2817.92	0.00986	2817.92	0.00878		2817.92	0.0068	2817.92	0.00628		2817.92	0.01074	2817.92	0.00922		2817.92	0.01269	2817.92	0.01115		2817.92	0.00945	2817.92	0.00809		1635.57	0.09517	1635.57	0.02349		2817.92	0.01445	2817.92	0.01003		1634.63	0.0697
2816.49	0.00982	2816.49	0.00852		2816.49	0.00606	2816.49	0.0061		2816.49	0.01021	2816.49	0.00895		2816.49	0.01301	2816.49	0.01132		2816.49	0.00717	2816.49	0.00707		1632.71	0.10425	1632.71	0.02675		2816.49	0.01468	2816.49	0.00991		1631.78	0.06994
2815.06	0.00979	2815.06	0.00797		2815.06	0.00546	2815.06	0.00555		2815.06	0.00944	2815.06	0.00832		2815.06	0.01288	2815.06	0.01102		2815.06	0.00548	2815.06	0.00614		1629.85	0.1128	1629.85	0.03085		2815.06	0.01309	2815.06	0.00854		1628.92	0.07028
2813.63	0.00975	2813.63	0.00725		2813.63	0.00516	2813.63	0.00476		2813.63	0.00866	2813.63	0.00754		2813.63	0.01231	2813.63	0.01025		2813.63	0.00482	2813.63	0.00556		1626.99	0.12313	1626.99	0.03599		2813.63	0.0101	2813.63	0.00626		1626.06	0.07083
2812.2	0.00974	2812.2	0.00656		2812.2	0.00525	2812.2	0.00397		2812.2	0.00816	2812.2	0.00684		2812.2	0.01136	2812.2	0.0091		2812.2	0.00537	2812.2	0.00553		1624.13	0.13631	1624.13	0.04191		2812.2	0.0066	2812.2	0.00375		1623.21	0.07126
2810.77	0.00978	2810.77	0.00617		2810.77	0.00571	2810.77	0.00346		2810.77	0.00803	2810.77	0.00642		2810.77	0.01021	2810.77	0.00776		2810.77	0.00701	2810.77	0.00612		1621.27	0.14995	1621.27	0.04754		2810.77	0.00373	2810.77	0.00174		1620.35	0.07136
2809.34	0.0099	2809.34	0.0062		2809.34	0.00642	2809.34	0.00345		2809.34	0.0082	2809.34	0.00637		2809.34	0.0091	2809.34	0.00652		2809.34	0.00937	2809.34	0.00726		1618.41	0.16136	1618.41	0.05245		2809.34	0.00236	2809.34	0.00082		1617.49	0.07122
2807.91	0.01009	2807.91	0.00667		2807.91	0.00721	2807.91	0.00398		2807.91	0.00858	2807.91	0.00669		2807.91	0.00825	2807.91	0.00563		2807.91	0.01187	2807.91	0.00869		1615.56	0.16982	1615.56	0.05706		2807.91	0.00281	2807.91	0.00119		1614.63	0.07101
2806.48	0.01035	2806.48	0.00745		2806.48	0.00786	2806.48	0.00489		2806.48	0.00914	2806.48	0.00734		2806.48	0.0078	2806.48	0.00525		2806.48	0.01386	2806.48	0.01003		1612.7	0.17477	1612.7	0.06085		2806.48	0.00484	2806.48	0.00265		1611.78	0.07082
2805.05	0.01063	2805.05	0.00834		2805.05	0.00824	2805.05	0.0059		2805.05	0.0099	2805.05	0.00816		2805.05	0.0078	2805.05	0.00542		2805.05	0.01479	2805.05	0.01088		1609.84	0.17626	1609.84	0.06243		2805.05	0.00786	2805.05	0.00474		1608.92	0.07066
2803.62	0.01087	2803.62	0.00909		2803.62	0.0083	2803.62	0.00672		2803.62	0.01073	2803.62	0.00893		2803.62	0.00819	2803.62	0.00604		2803.62	0.01443	2803.62	0.01105		1606.98	0.17493	1606.98	0.06137		2803.62	0.01113	2803.62	0.00693		1606.06	0.07055
2802.19	0.011	2802.19	0.0095		2802.19	0.00809	2802.19	0.00714		2802.19	0.0114	2802.19	0.00945		2802.19	0.0088	2802.19	0.00693		2802.19	0.01295	2802.19	0.01052		1604.12	0.17102	1604.12	0.05849		2802.19	0.01385	2802.19	0.00864		1603.2	0.0705
2800.76	0.01099	2800.76	0.00946		2800.76	0.00767	2800.76	0.00702		2800.76	0.01173	2800.76	0.00958		2800.76	0.00949	2800.76	0.00792		2800.76	0.01084	2800.76	0.00944		1601.26	0.1648	1601.26	0.05523		2800.76	0.01526	2800.76	0.00934		1600.35	0.07056
2799.33	0.01088	2799.33	0.00898		2799.33	0.00717	2799.33	0.00638		2799.33	0.01169	2799.33	0.00935		2799.33	0.01025	2799.33	0.00885		2799.33	0.00867	2799.33	0.0081		1598.4	0.1571	1598.4	0.05238		2799.33	0.01497	2799.33	0.00885		1597.49	0.07066
2797.9	0.01073	2797.9	0.00819		2797.9	0.0068	2797.9	0.0054		2797.9	0.0114	2797.9	0.00889		2797.9	0.01106	2797.9	0.00964		2797.9	0.00702	2797.9	0.0069		1595.54	0.14908	1595.54	0.04943		2797.9	0.01315	2797.9	0.00741		1594.63	0.07053
2796.47	0.01064	2796.47	0.0073		2796.47	0.00673	2796.47	0.00442		2796.47	0.01097	2796.47	0.00836		2796.47	0.01187	2796.47	0.01023		2796.47	0.00636	2796.47	0.00621		1592.68	0.14157	1592.68	0.04565		2796.47	0.01044	2796.47	0.00552		1591.78	0.06994
2795.04	0.01067	2795.04	0.00657		2795.04	0.00703	2795.04	0.00378		2795.04	0.0105	2795.04	0.00792		2795.04	0.01253	2795.04	0.01053		2795.04	0.00682	2795.04	0.00621		1589.82	0.13416	1589.82	0.04127		2795.04	0.00758	2795.04	0.00371		1588.92	0.06895
2793.61	0.01083	2793.61	0.00626		2793.61	0.00757	2793.61	0.00368		2793.61	0.01009	2793.61	0.00768		2793.61	0.01282	2793.61	0.01046		2793.61	0.00832	2793.61	0.00697		1586.96	0.12625	1586.96	0.03725		2793.61	0.00541	2793.61	0.00232		1586.06	0.068
2792.18	0.01111	2792.18	0.00653		2792.18	0.00819	2792.18	0.00415		2792.18	0.00982	2792.18	0.0077		2792.18	0.01267	2792.18	0.00998		2792.18	0.01043	2792.18	0.00831		1584.1	0.11838	1584.1	0.03422		2792.18	0.00443	2792.18	0.00168		1583.2	0.06761
2790.75	0.01149	2790.75	0.00732		2790.75	0.00868	2790.75	0.00505		2790.75	0.00971	2790.75	0.00791		2790.75	0.01217	2790.75	0.00915		2790.75	0.01258	2790.75	0.00991		1581.24	0.11158	1581.24	0.03192		2790.75	0.00495	2790.75	0.00193		1580.35	0.06798
2789.32	0.0119	2789.32	0.0084		2789.32	0.00892	2789.32	0.0061		2789.32	0.00982	2789.32	0.00821		2789.32	0.0115	2789.32	0.00819		2789.32	0.01429	2789.32	0.01132		1578.38	0.10617	1578.38	0.02958		2789.32	0.00684	2789.32	0.00299		1577.49	0.06871
2787.89	0.01225	2787.89	0.00944		2787.89	0.00885	2787.89	0.00701		2787.89	0.01015	2787.89	0.00849		2787.89	0.01086	2787.89	0.00733		2787.89	0.01512	2787.89	0.01219		1575.52	0.10182	1575.52	0.027		2787.89	0.00959	2787.89	0.00465		1574.63	0.06906
2786.46	0.01243	2786.46	0.01013		2786.46	0.00857	2786.46	0.00745		2786.46	0.01065	2786.46	0.00871		2786.46	0.01031	2786.46	0.00671		2786.46	0.01482	2786.46	0.01228		1572.66	0.09813	1572.66	0.02477		2786.46	0.01247	2786.46	0.0064		1571.78	0.06863
2785.03	0.01235	2785.03	0.01031		2785.03	0.00817	2785.03	0.00729		2785.03	0.01125	2785.03	0.00891		2785.03	0.0099	2785.03	0.0064		2785.03	0.0135	2785.03	0.01156		1569.8	0.09525	1569.8	0.02328		2785.03	0.01463	2785.03	0.00767		1568.92	0.06775
2783.6	0.01201	2783.6	0.00992		2783.6	0.0078	2783.6	0.0066		2783.6	0.01185	2783.6	0.00908		2783.6	0.00968	2783.6	0.00641		2783.6	0.01155	2783.6	0.01026		1566.95	0.09345	1566.95	0.02237		2783.6	0.01542	2783.6	0.00804		1566.06	0.06704
2782.17	0.01149	2782.17	0.00907		2782.17	0.00758	2782.17	0.00564		2782.17	0.01235	2782.17	0.00921		2782.17	0.00968	2782.17	0.0068		2782.17	0.00953	2782.17	0.00872		1564.09	0.09251	1564.09	0.02152		2782.17	0.01463	2782.17	0.00744		1563.2	0.0669
2780.74	0.01091	2780.74	0.00796		2780.74	0.00752	2780.74	0.00469		2780.74	0.01264	2780.74	0.00928		2780.74	0.00986	2780.74	0.00749		2780.74	0.00789	2780.74	0.00735		1561.23	0.09206	1561.23	0.02048		2780.74	0.01253	2780.74	0.00608		1560.35	0.06716
2779.31	0.01046	2779.31	0.00687		2779.31	0.00759	2779.31	0.00405		2779.31	0.01262	2779.31	0.00928		2779.31	0.01011	2779.31	0.00827		2779.31	0.00705	2779.31	0.00654		1558.37	0.09228	1558.37	0.02011		2779.31	0.00973	2779.31	0.00436		1557.49	0.06711
2777.88	0.01022	2777.88	0.00608		2777.88	0.00768	2777.88	0.00386		2777.88	0.0122	2777.88	0.00919		2777.88	0.01035	2777.88	0.00893		2777.88	0.00716	2777.88	0.0065		1555.51	0.09394	1555.51	0.02132		2777.88	0.007	2777.88	0.00271		1554.63	0.06651
2776.45	0.01024	2776.45	0.00581		2776.45	0.00779	2776.45	0.00416		2776.45	0.01141	2776.45	0.00897		2776.45	0.01058	2776.45	0.00937		2776.45	0.00815	2776.45	0.0072		1552.65	0.09696	1552.65	0.02322		2776.45	0.00511	2776.45	0.00153		1551.78	0.06621
2775.03	0.01049	2775.03	0.00617		2775.03	0.00792	2775.03	0.00486		2775.03	0.01041	2775.03	0.00861		2775.03	0.01086	2775.03	0.00962		2775.03	0.00978	2775.03	0.00848		1549.79	0.10066	1549.79	0.025		2775.03	0.00455	2775.03	0.00109		1548.92	0.06705
2773.6	0.01095	2773.6	0.00709		2773.6	0.008	2773.6	0.00575		2773.6	0.00946	2773.6	0.00815		2773.6	0.01116	2773.6	0.00969		2773.6	0.01167	2773.6	0.01003		1546.93	0.10498	1546.93	0.02659		2773.6	0.00538	2773.6	0.00145		1546.06	0.06936
2772.17	0.01156	2772.17	0.00837		2772.17	0.00799	2772.17	0.00653		2772.17	0.00882	2772.17	0.00771		2772.17	0.01138	2772.17	0.00954		2772.17	0.01331	2772.17	0.01142		1544.07	0.11063	1544.07	0.02863		2772.17	0.00724	2772.17	0.00246		1543.2	0.07276
2770.74	0.01218	2770.74	0.00964		2770.74	0.00793	2770.74	0.00694		2770.74	0.00868	2770.74	0.00742		2770.74	0.01146	2770.74	0.00917		2770.74	0.01421	2770.74	0.01219		1541.21	0.11884	1541.21	0.03243		2770.74	0.00958	2770.74	0.00381		1540.35	0.07568
2769.31	0.01264	2769.31	0.01055		2769.31	0.0079	2769.31	0.00684		2769.31	0.00906	2769.31	0.00738		2769.31	0.01134	2769.31	0.00861		2769.31	0.01408	2769.31	0.01205		1538.35	0.12869	1538.35	0.03838		2769.31	0.01183	2769.31	0.00507		1537.49	0.07649
2767.88	0.01275	2767.88	0.01082		2767.88	0.00793	2767.88	0.0063		2767.88	0.00987	2767.88	0.00761		2767.88	0.01108	2767.88	0.00794		2767.88	0.01298	2767.88	0.01105		1535.49	0.13752	1535.49	0.04474		2767.88	0.01337	2767.88	0.0059		1534.63	0.0758
2766.45	0.01247	2766.45	0.01039		2766.45	0.00805	2766.45	0.00555		2766.45	0.01095	2766.45	0.0081		2766.45	0.01073	2766.45	0.0073		2766.45	0.01123	2766.45	0.00952		1532.63	0.14508	1532.63	0.05022		2766.45	0.01373	2766.45	0.00607		1531.77	0.07525
2765.02	0.01184	2765.02	0.00938		2765.02	0.0082	2765.02	0.00484		2765.02	0.01208	2765.02	0.00878		2765.02	0.01039	2765.02	0.00684		2765.02	0.00933	2765.02	0.00792		1529.77	0.15163	1529.77	0.05424		2765.02	0.01279	2765.02	0.00558		1528.92	0.07566
2763.59	0.01103	2763.59	0.00807		2763.59	0.00825	2763.59	0.00441		2763.59	0.01302	2763.59	0.00954		2763.59	0.01012	2763.59	0.00666		2763.59	0.00774	2763.59	0.0067		1526.91	0.15642	1526.91	0.05627		2763.59	0.01086	2763.59	0.00461		1526.06	0.07724
2762.16	0.01025	2762.16	0.00682		2762.16	0.00815	2762.16	0.00439		2762.16	0.01349	2762.16	0.01016		2762.16	0.01001	2762.16	0.00681		2762.16	0.00689	2762.16	0.00618		1524.05	0.15831	1524.05	0.05675		2762.16	0.00854	2762.16	0.00344		1523.2	0.07994
2760.73	0.0097	2760.73	0.00597		2760.73	0.00795	2760.73	0.00479		2760.73	0.01322	2760.73	0.01038		2760.73	0.0101	2760.73	0.00727		2760.73	0.00701	2760.73	0.0065		1521.2	0.15645	1521.2	0.05703		2760.73	0.00651	2760.73	0.00235		1520.35	0.08333
2759.3	0.00955	2759.3	0.00577		2759.3	0.00777	2759.3	0.00546		2759.3	0.01219	2759.3	0.01009		2759.3	0.01035	2759.3	0.00792		2759.3	0.00808	2759.3	0.00758		1518.34	0.15229	1518.34	0.05773		2759.3	0.00531	2759.3	0.00159		1517.49	0.08672
2757.87	0.00985	2757.87	0.0063		2757.87	0.00762	2757.87	0.00613		2757.87	0.01065	2757.87	0.00933		2757.87	0.01067	2757.87	0.00861		2757.87	0.0098	2757.87	0.00909		1515.48	0.14887	1515.48	0.05811		2757.87	0.0052	2757.87	0.00132		1514.63	0.09002
2756.44	0.01055	2756.44	0.00746		2756.44	0.00748	2756.44	0.00656		2756.44	0.00904	2756.44	0.0083		2756.44	0.01095	2756.44	0.0092		2756.44	0.01166	2756.44	0.01057		1512.62	0.14723	1512.62	0.05769		2756.44	0.00619	2756.44	0.00161		1511.77	0.09364
2755.01	0.01145	2755.01	0.00896		2755.01	0.0074	2755.01	0.00663		2755.01	0.00783	2755.01	0.00728		2755.01	0.01112	2755.01	0.00958		2755.01	0.01316	2755.01	0.01157		1509.76	0.14721	1509.76	0.05732		2755.01	0.00797	2755.01	0.00234		1508.92	0.09728
2753.58	0.01234	2753.58	0.01038		2753.58	0.00748	2753.58	0.00636		2753.58	0.00733	2753.58	0.00654		2753.58	0.01117	2753.58	0.00967		2753.58	0.01387	2753.58	0.0118		1506.9	0.14879	1506.9	0.05861		2753.58	0.01003	2753.58	0.00326		1506.06	0.09956
2752.15	0.01304	2752.15	0.01134		2752.15	0.00773	2752.15	0.00586		2752.15	0.00769	2752.15	0.0063		2752.15	0.01106	2752.15	0.00944		2752.15	0.01361	2752.15	0.01122		1504.04	0.15174	1504.04	0.06142		2752.15	0.01175	2752.15	0.00403		1503.2	0.09961
2750.72	0.0134	2750.72	0.01161		2750.72	0.00804	2750.72	0.00532		2750.72	0.00884	2750.72	0.00668		2750.72	0.0108	2750.72	0.00895		2750.72	0.0125	2750.72	0.01001		1501.18	0.1558	1501.18	0.06383		2750.72	0.01265	2750.72	0.00446		1500.35	0.09821
2749.29	0.01333	2749.29	0.01117		2749.29	0.0083	2749.29	0.00494		2749.29	0.01054	2749.29	0.00766		2749.29	0.01047	2749.29	0.00832		2749.29	0.01088	2749.29	0.00855		1498.32	0.1607	1498.32	0.06551		2749.29	0.01251	2749.29	0.00449		1497.49	0.09633
2747.86	0.0128	2747.86	0.01013		2747.86	0.0084	2747.86	0.00485		2747.86	0.01242	2747.86	0.00905		2747.86	0.01019	2747.86	0.00773		2747.86	0.00917	2747.86	0.00726		1495.46	0.16548	1495.46	0.06726		2747.86	0.01147	2747.86	0.00418		1494.63	0.09462
2746.43	0.01193	2746.43	0.00875		2746.43	0.00835	2746.43	0.00512		2746.43	0.01403	2746.43	0.01052		2746.43	0.01002	2746.43	0.00728		2746.43	0.00778	2746.43	0.00648		1492.6	0.16913	1492.6	0.06926		2746.43	0.00986	2746.43	0.00366		1491.77	0.09376
2745	0.01095	2745	0.00743		2745	0.00821	2745	0.00568		2745	0.01488	2745	0.01163		2745	0.00994	2745	0.00704		2745	0.00708	2745	0.00641		1489.74	0.172	1489.74	0.07129		2745	0.00814	2745	0.00304		1488.92	0.09398
2743.57	0.01017	2743.57	0.00654		2743.57	0.00805	2743.57	0.00631		2743.57	0.01468	2743.57	0.01201		2743.57	0.00992	2743.57	0.00701		2743.57	0.00726	2743.57	0.0071		1486.88	0.17486	1486.88	0.07299		2743.57	0.00679	2743.57	0.00245		1486.06	0.09495
2742.14	0.00976	2742.14	0.00629		2742.14	0.00784	2742.14	0.00674		2742.14	0.01347	2742.14	0.01155		2742.14	0.00997	2742.14	0.00718		2742.14	0.00833	2742.14	0.00834		1484.02	0.17718	1484.02	0.07392		2742.14	0.0062	2742.14	0.00201		1483.2	0.09638
2740.71	0.00981	2740.71	0.00673		2740.71	0.00756	2740.71	0.00676		2740.71	0.0116	2740.71	0.01035		2740.71	0.01014	2740.71	0.00752		2740.71	0.00999	2740.71	0.00975		1481.16	0.1784	1481.16	0.07419		2740.71	0.00646	2740.71	0.00183		1480.35	0.09832
2739.28	0.0103	2739.28	0.00774		2739.28	0.00734	2739.28	0.00642		2739.28	0.00961	2739.28	0.0088		2739.28	0.01046	2739.28	0.00799		2739.28	0.0118	2739.28	0.01089		1478.3	0.17894	1478.3	0.07435		2739.28	0.00747	2739.28	0.00195		1477.49	0.10083
2737.85	0.01117	2737.85	0.00907		2737.85	0.00739	2737.85	0.00593		2737.85	0.00807	2737.85	0.00734		2737.85	0.01092	2737.85	0.00857		2737.85	0.01331	2737.85	0.01148		1475.45	0.17953	1475.45	0.07481		2737.85	0.009	2737.85	0.00235		1474.63	0.1036
2736.42	0.01228	2736.42	0.01041		2736.42	0.00784	2736.42	0.00557		2736.42	0.00739	2736.42	0.00636		2736.42	0.01146	2736.42	0.00916		2736.42	0.01415	2736.42	0.01144		1472.59	0.18054	1472.59	0.07581		2736.42	0.01066	2736.42	0.0029		1471.77	0.10602
2734.99	0.01337	2734.99	0.0114		2734.99	0.00859	2734.99	0.0055		2734.99	0.00776	2734.99	0.00614		2734.99	0.01192	2734.99	0.00961		2734.99	0.01413	2734.99	0.01082		1469.73	0.18157	1469.73	0.0773		2734.99	0.01192	2734.99	0.0034		1468.92	0.10786
2733.56	0.01414	2733.56	0.01177		2733.56	0.00933	2733.56	0.00569		2733.56	0.00911	2733.56	0.0068		2733.56	0.01216	2733.56	0.00981		2733.56	0.01328	2733.56	0.00983		1466.87	0.18223	1466.87	0.07886		2733.56	0.01239	2733.56	0.00368		1466.06	0.10956
2732.13	0.01437	2732.13	0.01143		2732.13	0.00971	2732.13	0.00608		2732.13	0.01114	2732.13	0.00821		2732.13	0.01212	2732.13	0.00972		2732.13	0.01183	2732.13	0.00872		1464.01	0.18268	1464.01	0.08025		2732.13	0.01197	2732.13	0.0037		1463.2	0.11168
2730.7	0.01398	2730.7	0.01045		2730.7	0.00956	2730.7	0.00649		2730.7	0.01337	2730.7	0.01007		2730.7	0.01181	2730.7	0.00936		2730.7	0.01018	2730.7	0.00778		1461.15	0.18337	1461.15	0.0814		2730.7	0.01088	2730.7	0.00349		1460.34	0.1145
2729.28	0.01307	2729.28	0.00913		2729.28	0.00894	2729.28	0.00678		2729.28	0.01519	2729.28	0.01184		2729.28	0.01124	2729.28	0.00875		2729.28	0.00876	2729.28	0.00721		1458.29	0.18488	1458.29	0.08266		2729.28	0.00945	2729.28	0.00314		1457.49	0.11769
2727.85	0.0119	2727.85	0.00784		2727.85	0.00806	2727.85	0.00681		2727.85	0.01605	2727.85	0.01297		2727.85	0.01047	2727.85	0.00795		2727.85	0.00788	2727.85	0.00715		1455.43	0.18724	1455.43	0.08481		2727.85	0.00804	2727.85	0.00269		1454.63	0.12036
2726.42	0.01076	2726.42	0.00694		2726.42	0.00719	2726.42	0.00653		2726.42	0.0157	2726.42	0.01315		2726.42	0.00961	2726.42	0.00712		2726.42	0.00775	2726.42	0.00759		1452.57	0.18967	1452.57	0.08767		2726.42	0.00704	2726.42	0.00228		1451.77	0.12205
2724.99	0.00989	2724.99	0.00663		2724.99	0.0065	2724.99	0.006		2724.99	0.01421	2724.99	0.01228		2724.99	0.00883	2724.99	0.00647		2724.99	0.00838	2724.99	0.00837		1449.71	0.19205	1449.71	0.0905		2724.99	0.00671	2724.99	0.00201		1448.92	0.12312
2723.56	0.00941	2723.56	0.00691		2723.56	0.00615	2723.56	0.00536		2723.56	0.01194	2723.56	0.01059		2723.56	0.0083	2723.56	0.00616		2723.56	0.00961	2723.56	0.00922		1446.85	0.195	1446.85	0.09317		2723.56	0.00704	2723.56	0.00191		1446.06	0.12392
2722.13	0.00943	2722.13	0.0077		2722.13	0.00632	2722.13	0.00486		2722.13	0.0095	2722.13	0.00853		2722.13	0.00809	2722.13	0.00627		2722.13	0.0111	2722.13	0.00987		1443.99	0.19869	1443.99	0.09567		2722.13	0.00791	2722.13	0.00198		1443.2	0.12465
2720.7	0.00998	2720.7	0.00879		2720.7	0.00704	2720.7	0.0047		2720.7	0.00752	2720.7	0.00666		2720.7	0.00819	2720.7	0.00674		2720.7	0.01238	2720.7	0.01006		1441.13	0.20287	1441.13	0.09822		2720.7	0.00907	2720.7	0.00215		1440.34	0.12556
2719.27	0.01093	2719.27	0.00993		2719.27	0.00809	2719.27	0.00496		2719.27	0.0065	2719.27	0.00544		2719.27	0.00854	2719.27	0.00741		2719.27	0.01305	2719.27	0.00971		1438.27	0.2074	1438.27	0.10129		2719.27	0.01018	2719.27	0.00235		1437.49	0.12673
2717.84	0.01206	2717.84	0.0108		2717.84	0.00908	2717.84	0.00558		2717.84	0.0067	2717.84	0.0052		2717.84	0.00903	2717.84	0.00809		2717.84	0.01295	2717.84	0.00898		1435.41	0.21213	1435.41	0.10514		2717.84	0.01085	2717.84	0.00254		1434.63	0.12781
2716.41	0.01308	2716.41	0.0112		2716.41	0.00966	2716.41	0.00638		2716.41	0.00812	2716.41	0.00606		2716.41	0.00962	2716.41	0.00868		2716.41	0.01217	2716.41	0.00816		1432.55	0.21669	1432.55	0.10927		2716.41	0.01087	2716.41	0.00269		1431.77	0.1285
2714.98	0.01377	2714.98	0.01105		2714.98	0.00967	2714.98	0.00711		2714.98	0.01043	2714.98	0.00787		2714.98	0.01028	2714.98	0.00913		2714.98	0.01094	2714.98	0.00748		1429.69	0.22102	1429.69	0.11305		2714.98	0.01027	2714.98	0.0028		1428.92	0.12898
2713.55	0.01393	2713.55	0.01042		2713.55	0.00914	2713.55	0.00751		2713.55	0.01302	2713.55	0.0101		2713.55	0.011	2713.55	0.00942		2713.55	0.00954	2713.55	0.00705		1426.84	0.22558	1426.84	0.11648		2713.55	0.00929	2713.55	0.00284		1426.06	0.12964
2712.12	0.01351	2712.12	0.00947		2712.12	0.00819	2712.12	0.0074		2712.12	0.01518	2712.12	0.01208		2712.12	0.01163	2712.12	0.00952		2712.12	0.0083	2712.12	0.00691		1423.98	0.23071	1423.98	0.11993		2712.12	0.00823	2712.12	0.0028		1423.2	0.13055
2710.69	0.01259	2710.69	0.00847		2710.69	0.00709	2710.69	0.00677		2710.69	0.01628	2710.69	0.01323		2710.69	0.012	2710.69	0.00937		2710.69	0.00754	2710.69	0.00705		1421.12	0.23637	1421.12	0.12398		2710.69	0.00741	2710.69	0.00268		1420.34	0.1313
2709.26	0.01143	2709.26	0.00768		2709.26	0.00616	2709.26	0.00579		2709.26	0.01602	2709.26	0.01327		2709.26	0.01197	2709.26	0.00899		2709.26	0.00749	2709.26	0.00741		1418.26	0.24187	1418.26	0.12886		2709.26	0.00707	2709.26	0.00253		1417.49	0.13139
2707.83	0.01032	2707.83	0.00731		2707.83	0.00568	2707.83	0.00476		2707.83	0.0145	2707.83	0.01221		2707.83	0.01156	2707.83	0.00843		2707.83	0.00818	2707.83	0.00784		1415.4	0.24636	1415.4	0.13371		2707.83	0.00727	2707.83	0.00237		1414.63	0.13079
2706.4	0.00954	2706.4	0.00744		2706.4	0.00583	2706.4	0.00401		2706.4	0.01217	2706.4	0.01035		2706.4	0.01086	2706.4	0.00777		2706.4	0.00941	2706.4	0.00818		1412.54	0.25004	1412.54	0.13764		2706.4	0.00791	2706.4	0.00223		1411.77	0.13011
2704.97	0.00923	2704.97	0.00795		2704.97	0.00661	2704.97	0.00386		2704.97	0.00966	2704.97	0.00817		2704.97	0.00997	2704.97	0.0071		2704.97	0.01079	2704.97	0.00831		1409.68	0.25362	1409.68	0.14104		2704.97	0.0088	2704.97	0.0021		1408.92	0.12991
2703.54	0.00946	2703.54	0.00871		2703.54	0.00785	2703.54	0.0044		2703.54	0.00764	2703.54	0.00627		2703.54	0.00903	2703.54	0.00657		2703.54	0.01188	2703.54	0.00822		1406.82	0.25734	1406.82	0.14478		2703.54	0.00971	2703.54	0.00202		1406.06	0.13039
2702.11	0.01021	2702.11	0.00951		2702.11	0.0092	2702.11	0.0055		2702.11	0.00662	2702.11	0.00517		2702.11	0.0082	2702.11	0.00631		2702.11	0.01244	2702.11	0.00797		1403.96	0.2612	1403.96	0.14932		2702.11	0.01033	2702.11	0.00198		1403.2	0.13138
2700.68	0.01132	2700.68	0.01019		2700.68	0.01021	2700.68	0.00677		2700.68	0.00687	2700.68	0.00514		2700.68	0.00767	2700.68	0.0064		2700.68	0.01242	2700.68	0.00768		1401.1	0.26563	1401.1	0.15451		2700.68	0.01036	2700.68	0.00195		1400.34	0.1321
2699.25	0.01253	2699.25	0.01057		2699.25	0.01052	2699.25	0.00779		2699.25	0.00837	2699.25	0.0062		2699.25	0.00752	2699.25	0.00681		2699.25	0.01186	2699.25	0.00747		1398.24	0.27122	1398.24	0.15998		2699.25	0.00983	2699.25	0.00197		1397.49	0.13142
2697.82	0.01353	2697.82	0.01058		2697.82	0.01005	2697.82	0.00821		2697.82	0.01077	2697.82	0.00809		2697.82	0.00775	2697.82	0.00743		2697.82	0.0109	2697.82	0.00741		1395.38	0.27767	1395.38	0.16544		2697.82	0.00905	2697.82	0.00217		1394.63	0.12905
2696.39	0.01409	2696.39	0.01026		2696.39	0.00902	2696.39	0.0079		2696.39	0.0134	2696.39	0.01027		2696.39	0.00829	2696.39	0.00809		2696.39	0.00978	2696.39	0.0075		1392.52	0.28397	1392.52	0.1708		2696.39	0.00832	2696.39	0.00254		1391.77	0.12631
2694.96	0.01411	2694.96	0.00975		2694.96	0.00778	2694.96	0.00694		2694.96	0.0155	2694.96	0.01214		2694.96	0.00904	2694.96	0.00865		2694.96	0.00879	2694.96	0.00764		1389.66	0.2901	1389.66	0.17628		2694.96	0.00783	2694.96	0.0029		1388.91	0.12481
2693.53	0.01363	2693.53	0.00921		2693.53	0.00667	2693.53	0.00562		2693.53	0.01652	2693.53	0.01318		2693.53	0.00993	2693.53	0.00904		2693.53	0.00823	2693.53	0.00775		1386.8	0.29693	1386.8	0.18217		2693.53	0.00765	2693.53	0.00315		1386.06	0.125
2692.1	0.01275	2692.1	0.00876		2692.1	0.00601	2692.1	0.00437		2692.1	0.01627	2692.1	0.01316		2692.1	0.01084	2692.1	0.00922		2692.1	0.00829	2692.1	0.00779		1383.94	0.30486	1383.94	0.1883		2692.1	0.00785	2692.1	0.00329		1383.2	0.12636
2690.67	0.01167	2690.67	0.00849		2690.67	0.00602	2690.67	0.00362		2690.67	0.01487	2690.67	0.01212		2690.67	0.01166	2690.67	0.0092		2690.67	0.00902	2690.67	0.00776		1381.09	0.31337	1381.09	0.19433		2690.67	0.00841	2690.67	0.00335		1380.34	0.12821
2689.24	0.01064	2689.24	0.00844		2689.24	0.00679	2689.24	0.00368		2689.24	0.0127	2689.24	0.01036		2689.24	0.01229	2689.24	0.00902		2689.24	0.01016	2689.24	0.00765		1378.23	0.32191	1378.23	0.20073		2689.24	0.00921	2689.24	0.0033		1377.49	0.1301
2687.81	0.0099	2687.81	0.0086		2687.81	0.00814	2687.81	0.0046		2687.81	0.01028	2687.81	0.00835		2687.81	0.01259	2687.81	0.00869		2687.81	0.01132	2687.81	0.00745		1375.37	0.33059	1375.37	0.20816		2687.81	0.01009	2687.81	0.0031		1374.63	0.13169
2686.38	0.00962	2686.38	0.00892		2686.38	0.00969	2686.38	0.00609		2686.38	0.00822	2686.38	0.00661		2686.38	0.01246	2686.38	0.00822		2686.38	0.01215	2686.38	0.0072		1372.51	0.33973	1372.51	0.21615		2686.38	0.01078	2686.38	0.0028		1371.77	0.13294
2684.95	0.00983	2684.95	0.00928		2684.95	0.01095	2684.95	0.00767		2684.95	0.00704	2684.95	0.00558		2684.95	0.01189	2684.95	0.00766		2684.95	0.01246	2684.95	0.00702		1369.65	0.34924	1369.65	0.22344		2684.95	0.01102	2684.95	0.00249		1368.91	0.13415
2683.53	0.01049	2683.53	0.0096		2683.53	0.0115	2683.53	0.00881		2683.53	0.00704	2683.53	0.00548		2683.53	0.01095	2683.53	0.00712		2683.53	0.01225	2683.53	0.00699		1366.79	0.35863	1366.79	0.22976		2683.53	0.01068	2683.53	0.00225		1366.06	0.13566
2682.1	0.0115	2682.1	0.00981		2682.1	0.01112	2682.1	0.00914		2682.1	0.00825	2682.1	0.00635		2682.1	0.00978	2682.1	0.00671		2682.1	0.01159	2682.1	0.00713		1363.93	0.36731	1363.93	0.23603		2682.1	0.00985	2682.1	0.00215		1363.2	0.13736
2680.67	0.01263	2680.67	0.00989		2680.67	0.00991	2680.67	0.00856		2680.67	0.01033	2680.67	0.00798		2680.67	0.0086	2680.67	0.00654		2680.67	0.01068	2680.67	0.0074		1361.07	0.37506	1361.07	0.24289		2680.67	0.00887	2680.67	0.00225		1360.34	0.13895
2679.24	0.01363	2679.24	0.00988		2679.24	0.00828	2679.24	0.00726		2679.24	0.01273	2679.24	0.00988		2679.24	0.00764	2679.24	0.00664		2679.24	0.0097	2679.24	0.00767		1358.21	0.3823	1358.21	0.25017		2679.24	0.00811	2679.24	0.00249		1357.49	0.14044
2677.81	0.01423	2677.81	0.00979		2677.81	0.00676	2677.81	0.00565		2677.81	0.01477	2677.81	0.01149		2677.81	0.00706	2677.81	0.00696		2677.81	0.00885	2677.81	0.00778		1355.35	0.38955	1355.35	0.25759		2677.81	0.00782	2677.81	0.00279		1354.63	0.1422
2676.38	0.01428	2676.38	0.00967		2676.38	0.00581	2676.38	0.00423		2676.38	0.01592	2676.38	0.01238		2676.38	0.00689	2676.38	0.00741		2676.38	0.00834	2676.38	0.00764		1352.49	0.39723	1352.49	0.26528		2676.38	0.00808	2676.38	0.00308		1351.77	0.14446
2674.95	0.01376	2674.95	0.00954		2674.95	0.00568	2674.95	0.00345		2674.95	0.01593	2674.95	0.01239		2674.95	0.00708	2674.95	0.00783		2674.95	0.00837	2674.95	0.00728		1349.63	0.40563	1349.63	0.27334		2674.95	0.00873	2674.95	0.00336		1348.91	0.14723
2673.52	0.0128	2673.52	0.00939		2673.52	0.00643	2673.52	0.00361		2673.52	0.01482	2673.52	0.01156		2673.52	0.00762	2673.52	0.00815		2673.52	0.00894	2673.52	0.00678		1346.77	0.41489	1346.77	0.28161		2673.52	0.00958	2673.52	0.00359		1346.06	0.15046
2672.09	0.01163	2672.09	0.00924		2672.09	0.00783	2672.09	0.00468		2672.09	0.01291	2672.09	0.01015		2672.09	0.00843	2672.09	0.00833		2672.09	0.00984	2672.09	0.00627		1343.91	0.42537	1343.91	0.29026		2672.09	0.01038	2672.09	0.00368		1343.2	0.15415
2670.66	0.01053	2670.66	0.00909		2670.66	0.00946	2670.66	0.00628		2670.66	0.01067	2670.66	0.00851		2670.66	0.00941	2670.66	0.00837		2670.66	0.01077	2670.66	0.00593		1341.05	0.43778	1341.05	0.29992		2670.66	0.01088	2670.66	0.00352		1340.34	0.15811
2669.23	0.00977	2669.23	0.00895		2669.23	0.01081	2669.23	0.00789		2669.23	0.00866	2669.23	0.00702		2669.23	0.01046	2669.23	0.00831		2669.23	0.01144	2669.23	0.00588		1338.19	0.45191	1338.19	0.31072		2669.23	0.01093	2669.23	0.00313		1337.49	0.16199
2667.8	0.00945	2667.8	0.00883		2667.8	0.01148	2667.8	0.00901		2667.8	0.00734	2667.8	0.00602		2667.8	0.01143	2667.8	0.00815		2667.8	0.01168	2667.8	0.00618		1335.34	0.46611	1335.34	0.32172		2667.8	0.0105	2667.8	0.00269		1334.63	0.16562
2666.37	0.00959	2666.37	0.00871		2666.37	0.01125	2666.37	0.00929		2666.37	0.00702	2666.37	0.00573		2666.37	0.01212	2666.37	0.00786		2666.37	0.01147	2666.37	0.00677		1332.48	0.47996	1332.48	0.33243		2666.37	0.0097	2666.37	0.00238		1331.77	0.16922
2664.94	0.01016	2664.94	0.00865		2664.94	0.01012	2664.94	0.00863		2664.94	0.00778	2664.94	0.00625		2664.94	0.01237	2664.94	0.00746		2664.94	0.01095	2664.94	0.00746		1329.62	0.49485	1329.62	0.3438		2664.94	0.00873	2664.94	0.00229		1328.91	0.17301
2663.51	0.01109	2663.51	0.00869		2663.51	0.00841	2663.51	0.00724		2663.51	0.00942	2663.51	0.00744		2663.51	0.01208	2663.51	0.00705		2663.51	0.01028	2663.51	0.00801		1326.76	0.51138	1326.76	0.35677		2663.51	0.00786	2663.51	0.00242		1326.06	0.17701
2662.08	0.01217	2662.08	0.00882		2662.08	0.00666	2662.08	0.00557		2662.08	0.01148	2662.08	0.00896		2662.08	0.01135	2662.08	0.00675		2662.08	0.00962	2662.08	0.00825		1323.9	0.52859	1323.9	0.37116		2662.08	0.00732	2662.08	0.00267		1323.2	0.18129
2660.65	0.0131	2660.65	0.009		2660.65	0.00543	2660.65	0.00416		2660.65	0.01337	2660.65	0.01037		2660.65	0.01033	2660.65	0.00663		2660.65	0.00909	2660.65	0.00809		1321.04	0.54627	1321.04	0.38656		2660.65	0.00729	2660.65	0.00298		1320.34	0.18598
2659.22	0.01363	2659.22	0.00921		2659.22	0.00512	2659.22	0.00345		2659.22	0.01457	2659.22	0.01132		2659.22	0.00921	2659.22	0.00666		2659.22	0.00884	2659.22	0.0076		1318.18	0.56586	1318.18	0.403		2659.22	0.00782	2659.22	0.00334		1317.48	0.19117
2657.79	0.01367	2657.79	0.00945		2657.79	0.00581	2657.79	0.00367		2657.79	0.01481	2657.79	0.01163		2657.79	0.00816	2657.79	0.00681		2657.79	0.00898	2657.79	0.00693		1315.32	0.58854	1315.32	0.42055		2657.79	0.00882	2657.79	0.00377		1314.63	0.19671
2656.36	0.01328	2656.36	0.00966		2656.36	0.00729	2656.36	0.00474		2656.36	0.01411	2656.36	0.01128		2656.36	0.00728	2656.36	0.00704		2656.36	0.00948	2656.36	0.00627		1312.46	0.61371	1312.46	0.43891		2656.36	0.01005	2656.36	0.00416		1311.77	0.20233
2654.93	0.01254	2654.93	0.00975		2654.93	0.00911	2654.93	0.00634		2654.93	0.01274	2654.93	0.01039		2654.93	0.00667	2654.93	0.00728		2654.93	0.01015	2654.93	0.00578		1309.6	0.63934	1309.6	0.45774		2654.93	0.01115	2654.93	0.00435		1308.91	0.2079
2653.5	0.01159	2653.5	0.00963		2653.5	0.0107	2653.5	0.00796		2653.5	0.01106	2653.5	0.00915		2653.5	0.00638	2653.5	0.00746		2653.5	0.01075	2653.5	0.00561		1306.74	0.66398	1306.74	0.47728		2653.5	0.01178	2653.5	0.00422		1306.06	0.2135
2652.07	0.01063	2652.07	0.00931		2652.07	0.01157	2652.07	0.00911		2652.07	0.00942	2652.07	0.00781		2652.07	0.00648	2652.07	0.00754		2652.07	0.01108	2652.07	0.00583		1303.88	0.68839	1303.88	0.49856		2652.07	0.01176	2652.07	0.00383		1303.2	0.21946
2650.64	0.00989	2650.64	0.00885		2650.64	0.01147	2650.64	0.00942		2650.64	0.00814	2650.64	0.00668		2650.64	0.00702	2650.64	0.00753		2650.64	0.01111	2650.64	0.0064		1301.02	0.71491	1301.02	0.52257		2650.64	0.01107	2650.64	0.00331		1300.34	0.22617
2649.21	0.00955	2649.21	0.00839		2649.21	0.01038	2649.21	0.00879		2649.21	0.00755	2649.21	0.00606		2649.21	0.00797	2649.21	0.00748		2649.21	0.01089	2649.21	0.00719		1298.16	0.74551	1298.16	0.54934		2649.21	0.00991	2649.21	0.00286		1297.48	0.23381
2647.78	0.00965	2647.78	0.00801		2647.78	0.00865	2647.78	0.00746		2647.78	0.00786	2647.78	0.00616		2647.78	0.00917	2647.78	0.00739		2647.78	0.01053	2647.78	0.00797		1295.3	0.78056	1295.3	0.57812		2647.78	0.00865	2647.78	0.0026		1294.63	0.24226
2646.35	0.01016	2646.35	0.0078		2646.35	0.00684	2646.35	0.00586		2646.35	0.00904	2646.35	0.007		2646.35	0.0104	2646.35	0.00726		2646.35	0.01015	2646.35	0.00852		1292.44	0.81857	1292.44	0.60829		2646.35	0.0077	2646.35	0.00258		1291.77	0.25134
2644.92	0.01096	2644.92	0.00782		2644.92	0.00557	2644.92	0.00454		2644.92	0.01078	2644.92	0.00834		2644.92	0.01142	2644.92	0.00709		2644.92	0.00984	2644.92	0.00863		1289.58	0.85749	1289.58	0.64003		2644.92	0.00734	2644.92	0.00277		1288.91	0.26096
2643.49	0.01192	2643.49	0.00811		2643.49	0.00522	2643.49	0.00394		2643.49	0.0126	2643.49	0.00981		2643.49	0.01205	2643.49	0.00689		2643.49	0.00966	2643.49	0.00826		1286.73	0.89726	1286.73	0.67405		2643.49	0.00764	2643.49	0.00316		1286.06	0.27098
2642.06	0.01282	2642.06	0.00866		2642.06	0.00589	2642.06	0.00425		2642.06	0.01403	2642.06	0.01107		2642.06	0.01221	2642.06	0.00672		2642.06	0.00967	2642.06	0.00757		1283.87	0.93959	1283.87	0.71009		2642.06	0.00852	2642.06	0.00374		1283.2	0.28107
2640.63	0.01348	2640.63	0.00936		2640.63	0.00738	2640.63	0.00536		2640.63	0.01478	2640.63	0.01186		2640.63	0.0119	2640.63	0.00666		2640.63	0.0099	2640.63	0.0068		1281.01	0.9797	1281.01	0.74604		2640.63	0.00981	2640.63	0.00447		1280.34	0.29089
2639.2	0.01375	2639.2	0.01001		2639.2	0.00927	2639.2	0.00691		2639.2	0.01474	2639.2	0.01203		2639.2	0.01121	2639.2	0.00676		2639.2	0.01033	2639.2	0.0062		1278.15	1.00867	1278.15	0.78028		2639.2	0.01123	2639.2	0.00514		1277.48	0.30049
2637.78	0.01359	2637.78	0.01042		2637.78	0.011	2637.78	0.00837		2637.78	0.01397	2637.78	0.01154		2637.78	0.01029	2637.78	0.00699		2637.78	0.01083	2637.78	0.00592		1275.29	1.02861	1275.29	0.81391		2637.78	0.01239	2637.78	0.00554		1274.63	0.31003
2636.35	0.01303	2636.35	0.01046		2636.35	0.01204	2636.35	0.00928		2636.35	0.01263	2636.35	0.01047		2636.35	0.0093	2636.35	0.00728		2636.35	0.01119	2636.35	0.00604		1272.43	1.04993	1272.43	0.84805		2636.35	0.01289	2636.35	0.00554		1271.77	0.31945
2634.92	0.01222	2634.92	0.01013		2634.92	0.01207	2634.92	0.00943		2634.92	0.01105	2634.92	0.00908		2634.92	0.00835	2634.92	0.00755		2634.92	0.01124	2634.92	0.00651		1269.57	1.08057	1269.57	0.8814		2634.92	0.01252	2634.92	0.00513		1268.91	0.32861
2633.49	0.01135	2633.49	0.00951		2633.49	0.0111	2633.49	0.00884		2633.49	0.00962	2633.49	0.00774		2633.49	0.00754	2633.49	0.00771		2633.49	0.01103	2633.49	0.00719		1266.71	1.12077	1266.71	0.91216		2633.49	0.01136	2633.49	0.00445		1266.06	0.33754
2632.06	0.01055	2632.06	0.00872		2632.06	0.00943	2632.06	0.00774		2632.06	0.00869	2632.06	0.00681		2632.06	0.00692	2632.06	0.0077		2632.06	0.01068	2632.06	0.00792		1263.85	1.16451	1263.85	0.93956		2632.06	0.00981	2632.06	0.0037		1263.2	0.34617
2630.63	0.01001	2630.63	0.00792		2630.63	0.00761	2630.63	0.00646		2630.63	0.00847	2630.63	0.00651		2630.63	0.00655	2630.63	0.00752		2630.63	0.01036	2630.63	0.00851		1260.99	1.2084	1260.99	0.96472		2630.63	0.00829	2630.63	0.00308		1260.34	0.35422
2629.2	0.00986	2629.2	0.00731		2629.2	0.00619	2629.2	0.00536		2629.2	0.00904	2629.2	0.00695		2629.2	0.00657	2629.2	0.00722		2629.2	0.01018	2629.2	0.00879		1258.13	1.24751	1258.13	0.99068		2629.2	0.00719	2629.2	0.00275		1257.48	0.36157
2627.77	0.01022	2627.77	0.00708		2627.77	0.00561	2627.77	0.0048		2627.77	0.01025	2627.77	0.00802		2627.77	0.00706	2627.77	0.00691		2627.77	0.01016	2627.77	0.00868		1255.27	1.26993	1255.27	1.01703		2627.77	0.00682	2627.77	0.00278		1254.63	0.36867
2626.34	0.01099	2626.34	0.00733		2626.34	0.00607	2626.34	0.00496		2626.34	0.01178	2626.34	0.00947		2626.34	0.00799	2626.34	0.00665		2626.34	0.01024	2626.34	0.0082		1252.41	1.28477	1252.41	1.03846		2626.34	0.00734	2626.34	0.00319		1251.77	0.37635
2624.91	0.01197	2624.91	0.00802		2624.91	0.00741	2624.91	0.00577		2624.91	0.01324	2624.91	0.01094		2624.91	0.00913	2624.91	0.00645		2624.91	0.01041	2624.91	0.00752		1249.55	1.31391	1249.55	1.0519		2624.91	0.00871	2624.91	0.00395		1248.91	0.38522
2623.48	0.0129	2623.48	0.00896		2623.48	0.00923	2623.48	0.00693		2623.48	0.01429	2623.48	0.01207		2623.48	0.01021	2623.48	0.00632		2623.48	0.01067	2623.48	0.00691		1246.69	1.35268	1246.69	1.05962		2623.48	0.01053	2623.48	0.00492		1246.05	0.39493
2622.05	0.01355	2622.05	0.0099		2622.05	0.01091	2622.05	0.00804		2622.05	0.01472	2622.05	0.01255		2622.05	0.01103	2622.05	0.00623		2622.05	0.01097	2622.05	0.00656		1243.83	1.38326	1243.83	1.07221		2622.05	0.01233	2622.05	0.00586		1243.2	0.40429
2620.62	0.01379	2620.62	0.01059		2620.62	0.01192	2620.62	0.00875		2620.62	0.01444	2620.62	0.01224		2620.62	0.01148	2620.62	0.00621		2620.62	0.01121	2620.62	0.00656		1240.98	1.38894	1240.98	1.09737		2620.62	0.01361	2620.62	0.00655		1240.34	0.41209
2619.19	0.0136	2619.19	0.01084		2619.19	0.01191	2619.19	0.00886		2619.19	0.01348	2619.19	0.01118		2619.19	0.01154	2619.19	0.00633		2619.19	0.01122	2619.19	0.00687		1238.12	1.39023	1238.12	1.12685		2619.19	0.01399	2619.19	0.00678		1237.48	0.41792
2617.76	0.01304	2617.76	0.0106		2617.76	0.01091	2617.76	0.00834		2617.76	0.01203	2617.76	0.00962		2617.76	0.01123	2617.76	0.00657		2617.76	0.01095	2617.76	0.00734		1235.26	1.39842	1235.26	1.15158		2617.76	0.01328	2617.76	0.00646		1234.63	0.42229
2616.33	0.01224	2616.33	0.00991		2616.33	0.00925	2616.33	0.00738		2616.33	0.01038	2616.33	0.00798		2616.33	0.01062	2616.33	0.00689		2616.33	0.01047	2616.33	0.00783		1232.4	1.42198	1232.4	1.15213		2616.33	0.01165	2616.33	0.00565		1231.77	0.42613
2614.9	0.01133	2614.9	0.00892		2614.9	0.00746	2614.9	0.00628		2614.9	0.00897	2614.9	0.0067		2614.9	0.00982	2614.9	0.00722		2614.9	0.01	2614.9	0.00822		1229.54	1.50152	1229.54	1.14251		2614.9	0.00959	2614.9	0.00457		1228.91	0.43015
2613.47	0.01049	2613.47	0.00784		2613.47	0.00609	2613.47	0.00537		2613.47	0.00816	2613.47	0.00611		2613.47	0.00896	2613.47	0.0075		2613.47	0.00974	2613.47	0.0084		1226.68	1.54788	1226.68	1.14929		2613.47	0.00771	2613.47	0.00351		1226.05	0.43462
2612.04	0.00991	2612.04	0.00695		2612.04	0.00549	2612.04	0.00492		2612.04	0.00818	2612.04	0.00636		2612.04	0.00814	2612.04	0.0077		2612.04	0.00979	2612.04	0.00838		1223.82	1.45791	1223.82	1.16463		2612.04	0.00651	2612.04	0.00278		1223.2	0.43962
2610.61	0.00978	2610.61	0.00649		2610.61	0.00581	2610.61	0.005		2610.61	0.00901	2610.61	0.00737		2610.61	0.00743	2610.61	0.00772		2610.61	0.01008	2610.61	0.00818		1220.96	1.43866	1220.96	1.17185		2610.61	0.00627	2610.61	0.00259		1220.34	0.44524
2609.18	0.01013	2609.18	0.0066		2609.18	0.00695	2609.18	0.00554		2609.18	0.0104	2609.18	0.00887		2609.18	0.00691	2609.18	0.00752		2609.18	0.01047	2609.18	0.00787		1218.1	1.43962	1218.1	1.1753		2609.18	0.00707	2609.18	0.00303		1217.48	0.4515
2607.75	0.01083	2607.75	0.00726		2607.75	0.00857	2607.75	0.00633		2607.75	0.01199	2607.75	0.01046		2607.75	0.00669	2607.75	0.00715		2607.75	0.0109	2607.75	0.00754		1215.24	1.45376	1215.24	1.18047		2607.75	0.00872	2607.75	0.00402		1214.63	0.45825
2606.32	0.01172	2606.32	0.00832		2606.32	0.01022	2606.32	0.00712		2606.32	0.01346	2606.32	0.01173		2606.32	0.00683	2606.32	0.0067		2606.32	0.01128	2606.32	0.00732		1212.38	1.48519	1212.38	1.18842		2606.32	0.01079	2606.32	0.00535		1211.77	0.46495
2604.89	0.01257	2604.89	0.0095		2604.89	0.01141	2604.89	0.00769		2604.89	0.01453	2604.89	0.01241		2604.89	0.00734	2604.89	0.00633		2604.89	0.01151	2604.89	0.0073		1209.52	1.52339	1209.52	1.19915		2604.89	0.01275	2604.89	0.00671		1208.91	0.47121
2603.46	0.01321	2603.46	0.01049		2603.46	0.01176	2603.46	0.0079		2603.46	0.015	2603.46	0.01233		2603.46	0.00815	2603.46	0.0061		2603.46	0.01151	2603.46	0.00746		1206.66	1.56505	1206.66	1.2133		2603.46	0.01405	2603.46	0.00774		1206.05	0.47736
2602.03	0.01352	2602.03	0.01104		2602.03	0.01112	2602.03	0.00771		2602.03	0.01468	2602.03	0.01148		2602.03	0.00913	2602.03	0.00603		2602.03	0.01124	2602.03	0.00775		1203.8	1.59201	1203.8	1.23796		2602.03	0.01431	2602.03	0.0081		1203.2	0.48403
2600.6	0.01344	2600.6	0.01099		2600.6	0.00966	2600.6	0.00715		2600.6	0.01355	2600.6	0.01007		2600.6	0.01005	2600.6	0.00606		2600.6	0.01078	2600.6	0.00805		1200.94	1.585	1200.94	1.27675		2600.6	0.0134	2600.6	0.00768		1200.34	0.49128
2599.17	0.013	2599.17	0.0104		2599.17	0.00789	2599.17	0.00642		2599.17	0.0118	2599.17	0.00846		2599.17	0.01072	2599.17	0.00618		2599.17	0.01022	2599.17	0.00826		1198.08	1.57804	1198.08	1.316		2599.17	0.01151	2599.17	0.00657		1197.48	0.49839
2597.74	0.01231	2597.74	0.00941		2597.74	0.00645	2597.74	0.00579		2597.74	0.00991	2597.74	0.0071		2597.74	0.01102	2597.74	0.00634		2597.74	0.00974	2597.74	0.0083		1195.22	1.60328	1195.22	1.33021		2597.74	0.00922	2597.74	0.00509		1194.63	0.50444
2596.31	0.0115	2596.31	0.00827		2596.31	0.00582	2596.31	0.00549		2596.31	0.00843	2596.31	0.00635		2596.31	0.01096	2596.31	0.00653		2596.31	0.00955	2596.31	0.0082		1192.37	1.61058	1192.37	1.32323		2596.31	0.00723	2596.31	0.00368		1191.77	0.50905
2594.88	0.01074	2594.88	0.00725		2594.88	0.00615	2594.88	0.00556		2594.88	0.00771	2594.88	0.00642		2594.88	0.01063	2594.88	0.0068		2594.88	0.00978	2594.88	0.00808		1189.51	1.57486	1189.51	1.31083		2594.88	0.00613	2594.88	0.00278		1188.91	0.51258
2593.45	0.01022	2593.45	0.00661		2593.45	0.00727	2593.45	0.00592		2593.45	0.00794	2593.45	0.00726		2593.45	0.01011	2593.45	0.00715		2593.45	0.01037	2593.45	0.00806		1186.65	1.5566	1186.65	1.32387		2593.45	0.00615	2593.45	0.00266		1186.05	0.5157
2592.03	0.01007	2592.03	0.00653		2592.03	0.00884	2592.03	0.00645		2592.03	0.00906	2592.03	0.00863		2592.03	0.00948	2592.03	0.00751		2592.03	0.01113	2592.03	0.00819		1183.79	1.57846	1183.79	1.35596		2592.03	0.00724	2592.03	0.00334		1183.2	0.51869
2590.6	0.01033	2590.6	0.0071		2590.6	0.01041	2590.6	0.00697		2590.6	0.01087	2590.6	0.01016		2590.6	0.00873	2590.6	0.00776		2590.6	0.01183	2590.6	0.0084		1180.93	1.63682	1180.93	1.38154		2590.6	0.00915	2590.6	0.00467		1180.34	0.52146
2589.17	0.01095	2589.17	0.00815		2589.17	0.01152	2589.17	0.00737		2589.17	0.01292	2589.17	0.01147		2589.17	0.00797	2589.17	0.0078		2589.17	0.01228	2589.17	0.00864		1178.07	1.77096	1178.07	1.38067		2589.17	0.01148	2589.17	0.00639		1177.48	0.52418
2587.74	0.01176	2587.74	0.00939		2587.74	0.01182	2587.74	0.00752		2587.74	0.01467	2587.74	0.01225		2587.74	0.00733	2587.74	0.00766		2587.74	0.01239	2587.74	0.00888		1175.21	1.74414	1175.21	1.37336		2587.74	0.01368	2587.74	0.0081		1174.62	0.5271
2586.31	0.0126	2586.31	0.01045		2586.31	0.01118	2586.31	0.00739		2586.31	0.01563	2586.31	0.01233		2586.31	0.00694	2586.31	0.00738		2586.31	0.01212	2586.31	0.00908		1172.35	1.73671	1172.35	1.37669		2586.31	0.01511	2586.31	0.00935		1171.77	0.53009
2584.88	0.0133	2584.88	0.01109		2584.88	0.00981	2584.88	0.00704		2584.88	0.01553	2584.88	0.01163		2584.88	0.00689	2584.88	0.00704		2584.88	0.01152	2584.88	0.0091		1169.49	1.75904	1169.49	1.38632		2584.88	0.01528	2584.88	0.00974		1168.91	0.53283
2583.45	0.01371	2583.45	0.01119		2583.45	0.00821	2583.45	0.00657		2583.45	0.01434	2583.45	0.01034		2583.45	0.00719	2583.45	0.0067		2583.45	0.01071	2583.45	0.00884		1166.63	1.69584	1166.63	1.40621		2583.45	0.01412	2583.45	0.00912		1166.05	0.53531
2582.02	0.01374	2582.02	0.01076		2582.02	0.00695	2582.02	0.00617		2582.02	0.01239	2582.02	0.00882		2582.02	0.00782	2582.02	0.00649		2582.02	0.00994	2582.02	0.00837		1163.77	1.67893	1163.77	1.43681		2582.02	0.01193	2582.02	0.00764		1163.2	0.53778
2580.59	0.01339	2580.59	0.00989		2580.59	0.00649	2580.59	0.00601		2580.59	0.0102	2580.59	0.00751		2580.59	0.00865	2580.59	0.00646		2580.59	0.00947	2580.59	0.00792		1160.91	1.70287	1160.91	1.43145		2580.59	0.00934	2580.59	0.00573		1160.34	0.54043
2579.16	0.01275	2579.16	0.0088		2579.16	0.00695	2579.16	0.00611		2579.16	0.00837	2579.16	0.00678		2579.16	0.00946	2579.16	0.0066		2579.16	0.00947	2579.16	0.00769		1158.05	1.7737	1158.05	1.44005		2579.16	0.00707	2579.16	0.00395		1157.48	0.54312
2577.73	0.01197	2577.73	0.00779		2577.73	0.00808	2577.73	0.00638		2577.73	0.00732	2577.73	0.00676		2577.73	0.01011	2577.73	0.0068		2577.73	0.0099	2577.73	0.00776		1155.19	1.8213	1155.19	1.48971		2577.73	0.00574	2577.73	0.00282		1154.62	0.54547
2576.3	0.01123	2576.3	0.00714		2576.3	0.0095	2576.3	0.00665		2576.3	0.00732	2576.3	0.0074		2576.3	0.01049	2576.3	0.00697		2576.3	0.0107	2576.3	0.00815		1152.33	1.79143	1152.33	1.50457		2576.3	0.00571	2576.3	0.00272		1151.77	0.54729
2574.87	0.01069	2574.87	0.00704		2574.87	0.01079	2574.87	0.00686		2574.87	0.00841	2574.87	0.0085		2574.87	0.01057	2574.87	0.00707		2574.87	0.01165	2574.87	0.00874		1149.47	1.76607	1149.47	1.48647		2574.87	0.00699	2574.87	0.00369		1148.91	0.54894
2573.44	0.01045	2573.44	0.00749		2573.44	0.01159	2573.44	0.00697		2573.44	0.01031	2573.44	0.00978		2573.44	0.01036	2573.44	0.00713		2573.44	0.01254	2573.44	0.0094		1146.62	1.76076	1146.62	1.50019		2573.44	0.00925	2573.44	0.0055		1146.05	0.55089
2572.01	0.01057	2572.01	0.00839		2572.01	0.01166	2572.01	0.00696		2572.01	0.01252	2572.01	0.01092		2572.01	0.00993	2572.01	0.00718		2572.01	0.01311	2572.01	0.00989		1143.76	1.76214	1143.76	1.52511		2572.01	0.01194	2572.01	0.00769		1143.2	0.55322
2570.58	0.01104	2570.58	0.00945		2570.58	0.01092	2570.58	0.00682		2570.58	0.01443	2570.58	0.01165		2570.58	0.00939	2570.58	0.00726		2570.58	0.01316	2570.58	0.01005		1140.9	1.74359	1140.9	1.55099		2570.58	0.01429	2570.58	0.00969		1140.34	0.55549
2569.15	0.01172	2569.15	0.01037		2569.15	0.00959	2569.15	0.00659		2569.15	0.01555	2569.15	0.01179		2569.15	0.00878	2569.15	0.00733		2569.15	0.01263	2569.15	0.00979		1138.04	1.72448	1138.04	1.56466		2569.15	0.01562	2569.15	0.01093		1137.48	0.55718
2567.72	0.01245	2567.72	0.01088		2567.72	0.00812	2567.72	0.00637		2567.72	0.01565	2567.72	0.01136		2567.72	0.00815	2567.72	0.00736		2567.72	0.01162	2567.72	0.00914		1135.18	1.71598	1135.18	1.56876		2567.72	0.01545	2567.72	0.01107		1134.62	0.55826
2566.29	0.01307	2566.29	0.01088		2566.29	0.00699	2566.29	0.00625		2566.29	0.0147	2566.29	0.01051		2566.29	0.00755	2566.29	0.00733		2566.29	0.01036	2566.29	0.00822		1132.32	1.73366	1132.32	1.55865		2566.29	0.0138	2566.29	0.00998		1131.77	0.55923
2564.86	0.01345	2564.86	0.0104		2564.86	0.00655	2564.86	0.00623		2564.86	0.01284	2564.86	0.00941		2564.86	0.00712	2564.86	0.00725		2564.86	0.00924	2564.86	0.00728		1129.46	1.76449	1129.46	1.55974		2564.86	0.0112	2564.86	0.00793		1128.91	0.56059
2563.43	0.01347	2563.43	0.00954		2563.43	0.00694	2563.43	0.00625		2563.43	0.01045	2563.43	0.00826		2563.43	0.007	2563.43	0.00715		2563.43	0.00861	2563.43	0.00663		1126.6	1.79289	1126.6	1.59373		2563.43	0.00843	2563.43	0.00551		1126.05	0.56256
2562	0.01309	2562	0.00853		2562	0.008	2562	0.00624		2562	0.00813	2562	0.0073		2562	0.00724	2562	0.00705		2562	0.00868	2562	0.00652		1123.74	1.81574	1123.74	1.59986		2562	0.00623	2562	0.00345		1123.2	0.56521
2560.57	0.01245	2560.57	0.00766		2560.57	0.00936	2560.57	0.00619		2560.57	0.0065	2560.57	0.00676		2560.57	0.00776	2560.57	0.00699		2560.57	0.0094	2560.57	0.00701		1120.88	1.82306	1120.88	1.58186		2560.57	0.00513	2560.57	0.0023		1120.34	0.56856
2559.14	0.01173	2559.14	0.00718		2559.14	0.01058	2559.14	0.00612		2559.14	0.00604	2559.14	0.00679		2559.14	0.00841	2559.14	0.00695		2559.14	0.01051	2559.14	0.00798		1118.02	1.82243	1118.02	1.5826		2559.14	0.00536	2559.14	0.00235		1117.48	0.57258
2557.71	0.01109	2557.71	0.00722		2557.71	0.01131	2557.71	0.00607		2557.71	0.00692	2557.71	0.00742		2557.71	0.00904	2557.71	0.00697		2557.71	0.01169	2557.71	0.00912		1115.16	1.8394	1115.16	1.59855		2557.71	0.00693	2557.71	0.00357		1114.62	0.5771
2556.28	0.01063	2556.28	0.00774		2556.28	0.01132	2556.28	0.00607		2556.28	0.00891	2556.28	0.00847		2556.28	0.00957	2556.28	0.00706		2556.28	0.01264	2556.28	0.01008		1112.3	1.8247	1112.3	1.60948		2556.28	0.00946	2556.28	0.0057		1111.77	0.58161
2554.85	0.01043	2554.85	0.00857		2554.85	0.01056	2554.85	0.00605		2554.85	0.01147	2554.85	0.00968		2554.85	0.00997	2554.85	0.0072		2554.85	0.01316	2554.85	0.01059		1109.44	1.79583	1109.44	1.61309		2554.85	0.01231	2554.85	0.00822		1108.91	0.58573
2553.42	0.01053	2553.42	0.00944		2553.42	0.00927	2553.42	0.006		2553.42	0.01387	2553.42	0.0107		2553.42	0.01016	2553.42	0.00731		2553.42	0.01314	2553.42	0.01056		1106.58	1.80347	1106.58	1.6273		2553.42	0.0147	2553.42	0.01048		1106.05	0.58996
2551.99	0.0109	2551.99	0.01006		2551.99	0.0079	2551.99	0.00599		2551.99	0.01549	2551.99	0.01131		2551.99	0.01009	2551.99	0.0073		2551.99	0.01254	2551.99	0.00997		1103.72	1.83411	1103.72	1.65431		2551.99	0.01596	2551.99	0.0118		1103.19	0.59537
2550.56	0.01146	2550.56	0.01027		2550.56	0.00696	2550.56	0.00607		2550.56	0.01593	2550.56	0.01137		2550.56	0.00976	2550.56	0.00719		2550.56	0.01147	2550.56	0.00893		1100.87	1.87474	1100.87	1.68251		2550.56	0.01567	2550.56	0.01174		1100.34	0.60266
2549.13	0.0121	2549.13	0.01004		2549.13	0.00676	2549.13	0.00621		2549.13	0.01509	2549.13	0.01092		2549.13	0.00928	2549.13	0.00706		2549.13	0.01022	2549.13	0.00768		1098.01	1.93668	1098.01	1.68204		2549.13	0.01384	2549.13	0.01029		1097.48	0.61205
2547.7	0.01271	2547.7	0.0095		2547.7	0.00735	2547.7	0.0063		2547.7	0.0132	2547.7	0.0101		2547.7	0.00875	2547.7	0.00699		2547.7	0.00914	2547.7	0.00661		1095.15	2.03359	1095.15	1.70381		2547.7	0.011	2547.7	0.00788		1094.62	0.62358
2546.28	0.01314	2546.28	0.0088		2546.28	0.00851	2546.28	0.0063		2546.28	0.01077	2546.28	0.00912		2546.28	0.00822	2546.28	0.00701		2546.28	0.00857	2546.28	0.00611		1092.29	1.95169	1092.29	1.75329		2546.28	0.00804	2546.28	0.00524		1091.77	0.63714
2544.85	0.01324	2544.85	0.00814		2544.85	0.00985	2544.85	0.00622		2544.85	0.00842	2544.85	0.00815		2544.85	0.00774	2544.85	0.00711		2544.85	0.00868	2544.85	0.00637		1089.43	1.96862	1089.43	1.82168		2544.85	0.00581	2544.85	0.00309		1088.91	0.6529
2543.42	0.01301	2543.42	0.00771		2543.42	0.01094	2543.42	0.00608		2543.42	0.00673	2543.42	0.00737		2543.42	0.00738	2543.42	0.00726		2543.42	0.00952	2543.42	0.00734		1086.57	2.02212	1086.57	1.84428		2543.42	0.00486	2543.42	0.00199		1086.05	0.67157
2541.99	0.01254	2541.99	0.00766		2541.99	0.01147	2541.99	0.00592		2541.99	0.00614	2541.99	0.00698		2541.99	0.00723	2541.99	0.00742		2541.99	0.01085	2541.99	0.00871		1083.71	2.01198	1083.71	1.86161		2541.99	0.00542	2541.99	0.00231		1083.19	0.69356
2540.56	0.01197	2540.56	0.00802		2540.56	0.01126	2540.56	0.0058		2540.56	0.00684	2540.56	0.00714		2540.56	0.00736	2540.56	0.00755		2540.56	0.01228	2540.56	0.0101		1080.85	2.00999	1080.85	1.88825		2540.56	0.00738	2540.56	0.00402		1080.34	0.7187
2539.13	0.01139	2539.13	0.00864		2539.13	0.01038	2539.13	0.00575		2539.13	0.00869	2539.13	0.00789		2539.13	0.00777	2539.13	0.0077		2539.13	0.01341	2539.13	0.01113		1077.99	2.02854	1077.99	1.91564		2539.13	0.01026	2539.13	0.0067		1077.48	0.74609
2537.7	0.01091	2537.7	0.00935		2537.7	0.00909	2537.7	0.00576		2537.7	0.01121	2537.7	0.00908		2537.7	0.0084	2537.7	0.00789		2537.7	0.01399	2537.7	0.01153		1075.13	2.04247	1075.13	1.96065		2537.7	0.01332	2537.7	0.00961		1074.62	0.77444
2536.27	0.01068	2536.27	0.0099		2536.27	0.00784	2536.27	0.00584		2536.27	0.01375	2536.27	0.01042		2536.27	0.00915	2536.27	0.00813		2536.27	0.01389	2536.27	0.01122		1072.27	2.05732	1072.27	2.01384		2536.27	0.01571	2536.27	0.01193		1071.77	0.80229
2534.84	0.01073	2534.84	0.01012		2534.84	0.00707	2534.84	0.006		2534.84	0.01567	2534.84	0.01156		2534.84	0.00986	2534.84	0.00834		2534.84	0.01315	2534.84	0.01023		1069.41	2.09289	1069.41	2.0458		2534.84	0.01679	2534.84	0.01302		1068.91	0.8272
2533.41	0.01102	2533.41	0.00993		2533.41	0.00706	2533.41	0.0062		2533.41	0.01649	2533.41	0.01221		2533.41	0.01038	2533.41	0.00844		2533.41	0.01188	2533.41	0.00877		1066.55	2.1313	1066.55	2.08712		2533.41	0.01619	2533.41	0.01258		1066.05	0.84557
2531.98	0.01146	2531.98	0.00939		2531.98	0.00784	2531.98	0.00632		2531.98	0.01604	2531.98	0.01222		2531.98	0.01061	2531.98	0.00834		2531.98	0.01038	2531.98	0.0072		1063.69	2.17788	1063.69	2.09402		2531.98	0.01405	2531.98	0.01069		1063.19	0.85436
2530.55	0.01197	2530.55	0.00871		2530.55	0.00916	2530.55	0.00634		2530.55	0.0144	2530.55	0.01155		2530.55	0.01055	2530.55	0.00806		2530.55	0.00907	2530.55	0.006		1060.83	2.20924	1060.83	2.1275		2530.55	0.01097	2530.55	0.00789		1060.34	0.85309
2529.12	0.01246	2529.12	0.00811		2529.12	0.0106	2529.12	0.00627		2529.12	0.01198	2529.12	0.01031		2529.12	0.01029	2529.12	0.00769		2529.12	0.00837	2529.12	0.00565		1057.97	2.24152	1057.97	2.19552		2529.12	0.00783	2529.12	0.00498		1057.48	0.84442
2527.69	0.01286	2527.69	0.00781		2527.69	0.01167	2527.69	0.00617		2527.69	0.00938	2527.69	0.00878		2527.69	0.00993	2527.69	0.00735		2527.69	0.00857	2527.69	0.00633		1055.11	2.30123	1055.11	2.32403		2527.69	0.00549	2527.69	0.00281		1054.62	0.8318
2526.26	0.01311	2526.26	0.0079		2526.26	0.01202	2526.26	0.00607		2526.26	0.0073	2526.26	0.00734		2526.26	0.0095	2526.26	0.00714		2526.26	0.00965	2526.26	0.00784		1052.26	2.35228	1052.26	2.35499		2526.26	0.00459	2526.26	0.00199		1051.77	0.81782
2524.83	0.01314	2524.83	0.0084		2524.83	0.01157	2524.83	0.00603		2524.83	0.00633	2524.83	0.00643		2524.83	0.00901	2524.83	0.00708		2524.83	0.01125	2524.83	0.00966		1049.4	2.34032	1049.4	2.35773		2524.83	0.00543	2524.83	0.00278		1048.91	0.80512
2523.4	0.01293	2523.4	0.00913		2523.4	0.01049	2523.4	0.00606		2523.4	0.00673	2523.4	0.00632		2523.4	0.0085	2523.4	0.00717		2523.4	0.01291	2523.4	0.01124		1046.54	2.34872	1046.54	2.35674		2523.4	0.00784	2523.4	0.005		1046.05	0.79589
2521.97	0.01251	2521.97	0.00988		2521.97	0.00911	2521.97	0.00614		2521.97	0.00844	2521.97	0.00706		2521.97	0.00804	2521.97	0.00737		2521.97	0.0142	2521.97	0.01215		1043.68	2.34435	1043.68	2.37445		2521.97	0.0111	2521.97	0.00798		1043.19	0.79029
2520.54	0.012	2520.54	0.01042		2520.54	0.00783	2520.54	0.00621		2520.54	0.011	2520.54	0.00849		2520.54	0.00774	2520.54	0.00763		2520.54	0.01477	2520.54	0.01216		1040.82	2.34902	1040.82	2.43144		2520.54	0.01423	2520.54	0.01086		1040.34	0.78776
2519.11	0.01147	2519.11	0.01054		2519.11	0.00706	2519.11	0.00625		2519.11	0.01372	2519.11	0.01019		2519.11	0.00768	2519.11	0.00794		2519.11	0.01449	2519.11	0.01126		1037.96	2.41136	1037.96	2.5077		2519.11	0.01636	2519.11	0.01285		1037.48	0.78783
2517.68	0.01103	2517.68	0.01019		2517.68	0.00709	2517.68	0.00627		2517.68	0.01584	2517.68	0.01168		2517.68	0.00792	2517.68	0.0083		2517.68	0.01338	2517.68	0.00965		1035.1	2.55131	1035.1	2.57305		2517.68	0.017	2517.68	0.0134		1034.62	0.78979
2516.25	0.01074	2516.25	0.00943		2516.25	0.00794	2516.25	0.00625		2516.25	0.01679	2516.25	0.01256		2516.25	0.00847	2516.25	0.00869		2516.25	0.01172	2516.25	0.00776		1032.24	2.46406	1032.24	2.60825		2516.25	0.01598	2516.25	0.01234		1031.76	0.79268
2514.82	0.01069	2514.82	0.00845		2514.82	0.00934	2514.82	0.00621		2514.82	0.01631	2514.82	0.0126		2514.82	0.00923	2514.82	0.00907		2514.82	0.00993	2514.82	0.00612		1029.38	2.42825	1029.38	2.58207		2514.82	0.01355	2514.82	0.00995		1028.91	0.79588
2513.39	0.0109	2513.39	0.00754		2513.39	0.0108	2513.39	0.00616		2513.39	0.01461	2513.39	0.01185		2513.39	0.00998	2513.39	0.00934		2513.39	0.0085	2513.39	0.0052		1026.52	2.44995	1026.52	2.57286		2513.39	0.01033	2513.39	0.00688		1026.05	0.79949
2511.96	0.01133	2511.96	0.007		2511.96	0.01183	2511.96	0.00615		2511.96	0.01219	2511.96	0.01049		2511.96	0.01053	2511.96	0.0094		2511.96	0.00784	2511.96	0.00529		1023.66	2.50937	1023.66	2.603		2511.96	0.00718	2511.96	0.00397		1023.19	0.80347
2510.53	0.01186	2510.53	0.00702		2510.53	0.0121	2510.53	0.00621		2510.53	0.00966	2510.53	0.00881		2510.53	0.0108	2510.53	0.0092		2510.53	0.00812	2510.53	0.00633		1020.8	2.49464	1020.8	2.67994		2510.53	0.00502	2510.53	0.00204		1020.34	0.80724
2509.1	0.0124	2509.1	0.00759		2509.1	0.01154	2509.1	0.00629		2509.1	0.00759	2509.1	0.00716		2509.1	0.01078	2509.1	0.00875		2509.1	0.00929	2509.1	0.008		1017.94	2.50803	1017.94	2.72804		2509.1	0.00451	2509.1	0.00166		1017.48	0.81055
2507.67	0.01282	2507.67	0.00854		2507.67	0.01031	2507.67	0.00632		2507.67	0.00641	2507.67	0.00599		2507.67	0.01051	2507.67	0.00813		2507.67	0.01104	2507.67	0.00983		1015.08	2.50686	1015.08	2.72786		2507.67	0.00581	2507.67	0.00294		1014.62	0.8141
2506.24	0.01302	2506.24	0.00961		2506.24	0.00876	2506.24	0.00622		2506.24	0.00643	2506.24	0.00568		2506.24	0.01005	2506.24	0.0075		2506.24	0.01291	2506.24	0.01134		1012.22	2.55737	1012.22	2.76596		2506.24	0.00847	2506.24	0.00549		1011.76	0.81858
2504.81	0.01293	2504.81	0.01049		2504.81	0.00734	2504.81	0.00603		2504.81	0.00769	2504.81	0.00639		2504.81	0.00951	2504.81	0.007		2504.81	0.01439	2504.81	0.01211		1009.36	2.57536	1009.36	2.79746		2504.81	0.01164	2504.81	0.00855		1008.91	0.82368
2503.38	0.01254	2503.38	0.01092		2503.38	0.00652	2503.38	0.00585		2503.38	0.00994	2503.38	0.00792		2503.38	0.00899	2503.38	0.00676		2503.38	0.01504	2503.38	0.0119		1006.51	2.51667	1006.51	2.72619		2503.38	0.01444	2503.38	0.01123		1006.05	0.82834
2501.95	0.01196	2501.95	0.01074		2501.95	0.00666	2501.95	0.00578		2501.95	0.01257	2501.95	0.00979		2501.95	0.00853	2501.95	0.00678		2501.95	0.01468	2501.95	0.01078		1003.65	2.5146	1003.65	2.67572		2501.95	0.01618	2501.95	0.01283		1003.19	0.83201
2500.53	0.01134	2500.53	0.00999		2500.53	0.00774	2500.53	0.00584		2500.53	0.01487	2500.53	0.01146		2500.53	0.00815	2500.53	0.00705		2500.53	0.01345	2500.53	0.00906		1000.79	2.50823	1000.79	2.67021		2500.53	0.01646	2500.53	0.01295		1000.34	0.83539
2499.1	0.01082	2499.1	0.00886		2499.1	0.00943	2499.1	0.00604		2499.1	0.01617	2499.1	0.01247		2499.1	0.00787	2499.1	0.00749		2499.1	0.01171	2499.1	0.00729		997.927	2.5194	997.927	2.76673		2499.1	0.01526	2499.1	0.01157		997.478	0.83951
2497.67	0.01048	2497.67	0.00766		2497.67	0.01116	2497.67	0.00635		2497.67	0.01616	2497.67	0.01261		2497.67	0.00774	2497.67	0.00804		2497.67	0.00989	2497.67	0.00597		995.068	2.52832	995.068	2.77048		2497.67	0.01284	2497.67	0.00901		994.621	0.84499
2496.24	0.01034	2496.24	0.00669		2496.24	0.01236	2496.24	0.00672		2496.24	0.01491	2496.24	0.01189		2496.24	0.00783	2496.24	0.00864		2496.24	0.00843	2496.24	0.00542		992.208	2.50777	992.208	2.70727		2496.24	0.00976	2496.24	0.00591		991.764	0.85115
2494.81	0.01044	2494.81	0.00622		2494.81	0.01265	2494.81	0.00703		2494.81	0.01277	2494.81	0.01047		2494.81	0.00816	2494.81	0.00923		2494.81	0.00773	2494.81	0.00578		989.349	2.5248	989.349	2.71197		2494.81	0.00683	2494.81	0.00315		988.907	0.85697
2493.38	0.01079	2493.38	0.00643		2493.38	0.01196	2493.38	0.00719		2493.38	0.01026	2493.38	0.00866		2493.38	0.00871	2493.38	0.00972		2493.38	0.00805	2493.38	0.00692		986.489	2.57329	986.489	2.74156		2493.38	0.00495	2493.38	0.0016		986.05	0.86286
2491.95	0.01135	2491.95	0.00727		2491.95	0.01054	2491.95	0.00711		2491.95	0.00794	2491.95	0.00691		2491.95	0.00936	2491.95	0.01005		2491.95	0.00938	2491.95	0.00856		983.63	2.63275	983.63	2.72628		2491.95	0.00475	2491.95	0.00175		983.192	0.86968
2490.52	0.01203	2490.52	0.00855		2490.52	0.00884	2490.52	0.00676		2490.52	0.00638	2490.52	0.00569		2490.52	0.00999	2490.52	0.01012		2490.52	0.01134	2490.52	0.01028		980.771	2.65861	980.771	2.70332		2490.52	0.00626	2490.52	0.00351		980.335	0.87771
2489.09	0.01267	2489.09	0.00994		2489.09	0.00736	2489.09	0.00619		2489.09	0.00602	2489.09	0.00536		2489.09	0.01048	2489.09	0.00992		2489.09	0.0134	2489.09	0.0116		977.911	2.68631	977.911	2.72451		2489.09	0.00892	2489.09	0.00628		977.478	0.88652
2487.66	0.01311	2487.66	0.01104		2487.66	0.00654	2487.66	0.0056		2487.66	0.00702	2487.66	0.00607		2487.66	0.01075	2487.66	0.00947		2487.66	0.01497	2487.66	0.01214		975.052	2.67986	975.052	2.78018		2487.66	0.01191	2487.66	0.00922		974.621	0.89508
2486.23	0.01323	2486.23	0.01149		2486.23	0.00666	2486.23	0.00521		2486.23	0.00919	2486.23	0.00763		2486.23	0.01078	2486.23	0.00883		2486.23	0.01566	2486.23	0.01173		972.193	2.6723	972.193	2.86855		2486.23	0.01444	2486.23	0.01155		971.764	0.9024
2484.8	0.01299	2484.8	0.01113		2484.8	0.00772	2484.8	0.00521		2484.8	0.01194	2484.8	0.00957		2484.8	0.01058	2484.8	0.00814		2484.8	0.01531	2484.8	0.01049		969.333	2.68705	969.333	2.89496		2484.8	0.01591	2484.8	0.01268		968.907	0.90758
2483.37	0.01241	2483.37	0.01009		2483.37	0.00941	2483.37	0.00563		2483.37	0.01448	2483.37	0.01133		2483.37	0.0102	2483.37	0.00752		2483.37	0.01403	2483.37	0.00879		966.474	2.67097	966.474	2.83992		2483.37	0.01599	2483.37	0.01238		966.049	0.91117
2481.94	0.01164	2481.94	0.00866		2481.94	0.01121	2481.94	0.00637		2481.94	0.01607	2481.94	0.01244		2481.94	0.0097	2481.94	0.0071		2481.94	0.01218	2481.94	0.00718		963.614	2.65843	963.614	2.76805		2481.94	0.01467	2481.94	0.01075		963.192	0.91504
2480.51	0.01086	2480.51	0.00724		2480.51	0.01259	2480.51	0.00725		2480.51	0.0164	2480.51	0.01265		2480.51	0.00918	2480.51	0.00695		2480.51	0.01026	2480.51	0.00611		960.755	2.61543	960.755	2.71744		2480.51	0.01227	2480.51	0.00821		960.335	0.92023
2479.08	0.0103	2479.08	0.00621		2479.08	0.01313	2479.08	0.00804		2479.08	0.01548	2479.08	0.01196		2479.08	0.0087	2479.08	0.0071		2479.08	0.0088	2479.08	0.00583		957.896	2.59927	957.896	2.73036		2479.08	0.00947	2479.08	0.00547		957.478	0.92587
2477.65	0.0101	2477.65	0.00586		2477.65	0.01265	2477.65	0.00848		2477.65	0.01356	2477.65	0.01058		2477.65	0.00836	2477.65	0.00752		2477.65	0.00818	2477.65	0.00633		955.036	2.58604	955.036	2.7325		2477.65	0.0071	2477.65	0.00331		954.62	0.93013
2476.22	0.01031	2476.22	0.00626		2476.22	0.01126	2476.22	0.00837		2476.22	0.01107	2476.22	0.00882		2476.22	0.00819	2476.22	0.00814		2476.22	0.00858	2476.22	0.0075		952.177	2.57895	952.177	2.7613		2476.22	0.00588	2476.22	0.00233		951.763	0.93261
2474.79	0.01086	2474.79	0.0073		2474.79	0.0094	2474.79	0.00772		2474.79	0.00857	2474.79	0.00714		2474.79	0.00822	2474.79	0.00886		2474.79	0.00992	2474.79	0.00904		949.317	2.56719	949.317	2.78818		2474.79	0.00618	2474.79	0.00287		948.906	0.93504
2473.36	0.01163	2473.36	0.00869		2473.36	0.00769	2473.36	0.00677		2473.36	0.00671	2473.36	0.00597		2473.36	0.00844	2473.36	0.0096		2473.36	0.01185	2473.36	0.01058		946.458	2.57508	946.458	2.81013		2473.36	0.00784	2473.36	0.0048		946.049	0.9391
2471.93	0.01246	2471.93	0.01006		2471.93	0.0067	2471.93	0.00586		2471.93	0.00606	2471.93	0.00562		2471.93	0.0088	2471.93	0.01022		2471.93	0.01387	2471.93	0.01167		943.599	2.65148	943.599	2.85431		2471.93	0.01034	2471.93	0.00748		943.192	0.9441
2470.5	0.01318	2470.5	0.011		2470.5	0.00675	2470.5	0.00531		2470.5	0.00683	2470.5	0.00619		2470.5	0.00925	2470.5	0.01061		2470.5	0.01543	2470.5	0.012		940.739	2.69579	940.739	2.87471		2470.5	0.01297	2470.5	0.01011		940.335	0.9486
2469.07	0.01358	2469.07	0.01125		2469.07	0.00779	2469.07	0.0053		2469.07	0.00885	2469.07	0.0075		2469.07	0.00973	2469.07	0.01069		2469.07	0.01612	2469.07	0.01152		937.88	2.5599	937.88	2.81562		2469.07	0.01501	2469.07	0.01192		937.477	0.95232
2467.64	0.01353	2467.64	0.01069		2467.64	0.00949	2467.64	0.00584		2467.64	0.0115	2467.64	0.00917		2467.64	0.01019	2467.64	0.01044		2467.64	0.01572	2467.64	0.01038		935.02	2.53241	935.02	2.79631		2467.64	0.01592	2467.64	0.01243		934.62	0.95543
2466.21	0.01302	2466.21	0.00949		2466.21	0.01136	2466.21	0.00681		2466.21	0.01406	2466.21	0.01073		2466.21	0.01055	2466.21	0.00995		2466.21	0.01431	2466.21	0.00891		932.161	2.48924	932.161	2.83659		2466.21	0.01553	2466.21	0.01157		931.763	0.95826
2464.78	0.01216	2464.78	0.00797		2464.78	0.01282	2464.78	0.00791		2464.78	0.01583	2464.78	0.01177		2464.78	0.01077	2464.78	0.00928		2464.78	0.01228	2464.78	0.00748		929.302	2.49108	929.302	2.88098		2464.78	0.01395	2464.78	0.00964		928.906	0.96136
2463.35	0.01115	2463.35	0.00655		2463.35	0.0134	2463.35	0.00881		2463.35	0.0164	2463.35	0.01206		2463.35	0.01079	2463.35	0.00857		2463.35	0.01019	2463.35	0.00646		926.442	2.5558	926.442	2.95014		2463.35	0.01155	2463.35	0.00716		926.049	0.96567
2461.92	0.01025	2461.92	0.00559		2461.92	0.01288	2461.92	0.00916		2461.92	0.01572	2461.92	0.01157		2461.92	0.01057	2461.92	0.00789		2461.92	0.00857	2461.92	0.00612		923.583	2.59846	923.583	2.97276		2461.92	0.00896	2461.92	0.00477		923.191	0.97145
2460.49	0.00966	2460.49	0.00533		2460.49	0.0114	2460.49	0.00878		2460.49	0.01394	2460.49	0.01042		2460.49	0.01016	2460.49	0.00733		2460.49	0.00783	2460.49	0.00652		920.724	2.56328	920.724	2.83998		2460.49	0.00694	2460.49	0.00313		920.334	0.97799
2459.06	0.00953	2459.06	0.00582		2459.06	0.00945	2459.06	0.0078		2459.06	0.01141	2459.06	0.00886		2459.06	0.00962	2459.06	0.00692		2459.06	0.00817	2459.06	0.00754		917.864	2.49398	917.864	2.82512		2459.06	0.00613	2459.06	0.00276		917.477	0.98457
2457.63	0.00987	2457.63	0.00689		2457.63	0.00764	2457.63	0.0065		2457.63	0.00867	2457.63	0.00722		2457.63	0.00904	2457.63	0.00676		2457.63	0.00956	2457.63	0.00891		915.005	2.44023	915.005	2.81665		2457.63	0.00672	2457.63	0.00378		914.62	0.99013
2456.2	0.01059	2456.2	0.00821		2456.2	0.0065	2456.2	0.0053		2456.2	0.00641	2456.2	0.00591		2456.2	0.00856	2456.2	0.00692		2456.2	0.01167	2456.2	0.01027		912.145	2.41838	912.145	2.76375		2456.2	0.00845	2456.2	0.00584		911.763	0.99434
2454.78	0.0115	2454.78	0.00939		2454.78	0.00637	2454.78	0.00459		2454.78	0.0053	2454.78	0.00528		2454.78	0.00826	2454.78	0.00742		2454.78	0.01391	2454.78	0.01126		909.286	2.42754	909.286	2.75337		2454.78	0.01074	2454.78	0.00825		908.905	0.99809
2453.35	0.01241	2453.35	0.0101		2453.35	0.0073	2453.35	0.00463		2453.35	0.00574	2453.35	0.0055		2453.35	0.0082	2453.35	0.00821		2453.35	0.01566	2453.35	0.01159		906.427	2.48343	906.427	2.77289		2453.35	0.01297	2453.35	0.0103		906.048	1.00142
2451.92	0.01311	2451.92	0.01019		2451.92	0.00902	2451.92	0.00548		2451.92	0.00765	2451.92	0.00652		2451.92	0.00833	2451.92	0.00914		2451.92	0.0164	2451.92	0.01119		903.567	2.47803	903.567	2.75536		2451.92	0.01458	2451.92	0.01148		903.191	1.00452
2450.49	0.01342	2450.49	0.00966		2450.49	0.01098	2450.49	0.00688		2450.49	0.01045	2450.49	0.00805		2450.49	0.00863	2450.49	0.01		2450.49	0.01592	2450.49	0.0102		900.708	2.46509	900.708	2.68893		2450.49	0.01524	2450.49	0.01154		900.334	1.00815
2449.06	0.01326	2449.06	0.00865		2449.06	0.01254	2449.06	0.00839		2449.06	0.01327	2449.06	0.00964		2449.06	0.00899	2449.06	0.01059		2449.06	0.01438	2449.06	0.00891		897.848	2.46684	897.848	2.64241		2449.06	0.01479	2449.06	0.01052		897.477	1.01365
2447.63	0.01264	2447.63	0.00741		2447.63	0.01323	2447.63	0.00951		2447.63	0.01536	2447.63	0.0109		2447.63	0.00933	2447.63	0.01078		2447.63	0.01227	2447.63	0.00765		894.989	2.47099	894.989	2.62841		2447.63	0.01335	2447.63	0.00867		894.619	1.0212
2446.2	0.01167	2446.2	0.00625		2446.2	0.01287	2446.2	0.00986		2446.2	0.01629	2446.2	0.01155		2446.2	0.00962	2446.2	0.01055		2446.2	0.01017	2446.2	0.00673		892.13	2.46903	892.13	2.61549		2446.2	0.01126	2446.2	0.00653		891.762	1.02988
2444.77	0.01061	2444.77	0.00551		2444.77	0.01156	2444.77	0.00931		2444.77	0.01595	2444.77	0.01149		2444.77	0.00989	2444.77	0.01002		2444.77	0.00864	2444.77	0.00638		889.27	2.48251	889.27	2.61318		2444.77	0.00915	2444.77	0.0047		888.905	1.03898
2443.34	0.00976	2443.34	0.00537		2443.34	0.00968	2443.34	0.00799		2443.34	0.01438	2443.34	0.01071		2443.34	0.01014	2443.34	0.00929		2443.34	0.00804	2443.34	0.00671		886.411	2.4674	886.411	2.61225		2443.34	0.00766	2443.34	0.00373		886.048	1.04824
2441.91	0.00933	2441.91	0.00584		2441.91	0.00781	2441.91	0.00636		2441.91	0.01188	2441.91	0.00937		2441.91	0.01033	2441.91	0.00852		2441.91	0.00851	2441.91	0.00764		883.551	2.47461	883.551	2.6133		2441.91	0.00722	2441.91	0.00389		883.191	1.0568
2440.48	0.0094	2440.48	0.00673		2440.48	0.00655	2440.48	0.00495		2440.48	0.00903	2440.48	0.00777		2440.48	0.01042	2440.48	0.00784		2440.48	0.00995	2440.48	0.00891		880.692	2.47291	880.692	2.69872		2440.48	0.00791	2440.48	0.00512		880.333	1.06385
2439.05	0.00994	2439.05	0.00775		2439.05	0.00634	2439.05	0.00427		2439.05	0.00661	2439.05	0.00632		2439.05	0.01037	2439.05	0.00732		2439.05	0.01203	2439.05	0.01019		877.833	2.43273	877.833	2.7942		2439.05	0.00944	2439.05	0.00701		877.476	1.06913
2437.62	0.0108	2437.62	0.00861		2437.62	0.00721	2437.62	0.00454		2437.62	0.00532	2437.62	0.00539		2437.62	0.01015	2437.62	0.00698		2437.62	0.01418	2437.62	0.01112		874.973	2.36993	874.973	2.78662		2437.62	0.01134	2437.62	0.00896		874.619	1.07272
2436.19	0.01182	2436.19	0.00911		2436.19	0.00886	2436.19	0.00571		2436.19	0.00556	2436.19	0.00528		2436.19	0.00978	2436.19	0.00685		2436.19	0.0158	2436.19	0.01148		872.114	2.36673	872.114	2.728		2436.19	0.01309	2436.19	0.01041		871.762	1.07583
2434.76	0.01276	2434.76	0.00916		2434.76	0.01076	2434.76	0.00741		2434.76	0.0073	2434.76	0.00605		2434.76	0.00935	2434.76	0.00699		2434.76	0.01646	2434.76	0.0112		869.254	2.3973	869.254	2.68041		2434.76	0.01428	2434.76	0.01103		868.905	1.07998
2433.33	0.0134	2433.33	0.00876		2433.33	0.01235	2433.33	0.0091		2433.33	0.01008	2433.33	0.00755		2433.33	0.009	2433.33	0.00743		2433.33	0.01601	2433.33	0.01038		866.395	2.48722	866.395	2.643		2433.33	0.01467	2433.33	0.01071		866.047	1.08435
2431.9	0.01358	2431.9	0.00803		2431.9	0.01316	2431.9	0.01024		2431.9	0.01311	2431.9	0.00939		2431.9	0.00881	2431.9	0.00814		2431.9	0.01459	2431.9	0.00923		863.536	2.53688	863.536	2.65375		2431.9	0.01419	2431.9	0.00958		863.19	1.08727
2430.47	0.01325	2430.47	0.00718		2430.47	0.01297	2430.47	0.01048		2430.47	0.01558	2430.47	0.01109		2430.47	0.00883	2430.47	0.00901		2430.47	0.01255	2430.47	0.00799		860.676	2.54958	860.676	2.64282		2430.47	0.01293	2430.47	0.00796		860.333	1.0887
2429.04	0.0125	2429.04	0.00646		2429.04	0.01182	2429.04	0.00975		2429.04	0.0169	2429.04	0.01224		2429.04	0.00903	2429.04	0.00993		2429.04	0.01037	2429.04	0.00698		857.817	2.51537	857.817	2.63518		2429.04	0.01125	2429.04	0.00636		857.476	1.08902
2427.61	0.01149	2427.61	0.00606		2427.61	0.01004	2427.61	0.00829		2427.61	0.0168	2427.61	0.01258		2427.61	0.00932	2427.61	0.01069		2427.61	0.00864	2427.61	0.00648		854.958	2.51085	854.958	2.63749		2427.61	0.00967	2427.61	0.00523		854.619	1.08875
2426.18	0.01045	2426.18	0.00604		2426.18	0.00819	2426.18	0.00658		2426.18	0.01529	2426.18	0.01202		2426.18	0.00961	2426.18	0.01111		2426.18	0.00784	2426.18	0.00666		852.098	2.46734	852.098	2.63149		2426.18	0.0087	2426.18	0.00487		851.761	1.08981
2424.75	0.00966	2424.75	0.00636		2424.75	0.00683	2424.75	0.00515		2424.75	0.0127	2424.75	0.01061		2424.75	0.00981	2424.75	0.01109		2424.75	0.00826	2424.75	0.00748		849.239	2.4652	849.239	2.60575		2424.75	0.00859	2424.75	0.00534		848.904	1.09446
2423.32	0.00933	2423.32	0.00691		2423.32	0.00638	2423.32	0.00448		2423.32	0.00966	2423.32	0.00864		2423.32	0.00991	2423.32	0.01064		2423.32	0.00981	2423.32	0.00874		846.379	2.54901	846.379	2.57984		2423.32	0.00925	2423.32	0.00644		846.047	1.10159
2421.89	0.00957	2421.89	0.00751		2421.89	0.00699	2421.89	0.00479		2421.89	0.00698	2421.89	0.00663		2421.89	0.00996	2421.89	0.00988		2421.89	0.01209	2421.89	0.01007		843.52	2.54136	843.52	2.6289		2421.89	0.01037	2421.89	0.00784		843.19	1.10749
2420.46	0.01034	2420.46	0.00801		2420.46	0.00848	2420.46	0.00601		2420.46	0.00541	2420.46	0.00515		2420.46	0.01003	2420.46	0.00898		2420.46	0.01444	2420.46	0.01116		840.661	2.5503	840.661	2.68183		2420.46	0.01161	2420.46	0.00907		840.333	1.11009
2419.03	0.01141	2419.03	0.00828		2419.03	0.01041	2419.03	0.00772		2419.03	0.00542	2419.03	0.00465		2419.03	0.01013	2419.03	0.0081		2419.03	0.01622	2419.03	0.01173		837.801	2.58532	837.801	2.67968		2419.03	0.01269	2419.03	0.00976		837.475	1.10934
2417.6	0.01249	2417.6	0.00826		2417.6	0.01217	2417.6	0.00936		2417.6	0.00706	2417.6	0.00534		2417.6	0.01021	2417.6	0.0074		2417.6	0.01697	2417.6	0.01164		834.942	2.55903	834.942	2.62757		2417.6	0.01337	2417.6	0.00976		834.618	1.10457
2416.17	0.01329	2416.17	0.00797		2416.17	0.01319	2416.17	0.0104		2416.17	0.00989	2416.17	0.00701		2416.17	0.01023	2416.17	0.00696		2416.17	0.01651	2416.17	0.01088		832.082	2.47687	832.082	2.5906		2416.17	0.01352	2416.17	0.00917		831.761	1.10066
2414.74	0.01364	2414.74	0.00749		2414.74	0.01315	2414.74	0.01046		2414.74	0.01304	2414.74	0.00919		2414.74	0.01011	2414.74	0.00682		2414.74	0.01496	2414.74	0.00966		829.223	2.44933	829.223	2.55715		2414.74	0.0131	2414.74	0.00825		828.904	1.10189
2413.31	0.01344	2413.31	0.00696		2413.31	0.01207	2413.31	0.00953		2413.31	0.01561	2413.31	0.01123		2413.31	0.00988	2413.31	0.00697		2413.31	0.01274	2413.31	0.00834		826.364	2.4619	826.364	2.53672		2413.31	0.01221	2413.31	0.00731		826.047	1.10782
2411.88	0.01276	2411.88	0.00654		2411.88	0.01031	2411.88	0.00791		2411.88	0.01694	2411.88	0.01261		2411.88	0.00962	2411.88	0.00739		2411.88	0.01044	2411.88	0.00721		823.504	2.56243	823.504	2.56853		2411.88	0.01109	2411.88	0.00657		823.189	1.11548
2410.45	0.01174	2410.45	0.00633		2410.45	0.00841	2410.45	0.00618		2410.45	0.01672	2410.45	0.01296		2410.45	0.00941	2410.45	0.00801		2410.45	0.0086	2410.45	0.00654		820.645	2.53705	820.645	2.59223		2410.45	0.01014	2410.45	0.00625		820.332	1.11963
2409.03	0.01063	2409.03	0.00635		2409.03	0.00701	2409.03	0.00488		2409.03	0.01498	2409.03	0.01214		2409.03	0.00928	2409.03	0.00876		2409.03	0.00771	2409.03	0.00648		817.785	2.43185	817.785	2.58758		2409.03	0.00958	2409.03	0.00639		817.475	1.11927
2407.6	0.00969	2407.6	0.00651		2407.6	0.00646	2407.6	0.00438		2407.6	0.01215	2407.6	0.01032		2407.6	0.00921	2407.6	0.00954		2407.6	0.00799	2407.6	0.00711		814.926	2.39105	814.926	2.61027		2407.6	0.00952	2407.6	0.00681		814.618	1.1176
2406.17	0.0091	2406.17	0.00671		2406.17	0.00686	2406.17	0.00477		2406.17	0.009	2406.17	0.00796		2406.17	0.00919	2406.17	0.01022		2406.17	0.00946	2406.17	0.0083		812.067	2.38945	812.067	2.62948		2406.17	0.00984	2406.17	0.00741		811.761	1.11527
2404.74	0.00899	2404.74	0.00681		2404.74	0.00807	2404.74	0.00587		2404.74	0.0064	2404.74	0.00574		2404.74	0.00922	2404.74	0.01066		2404.74	0.01177	2404.74	0.00969		809.207	2.43988	809.207	2.61578		2404.74	0.01039	2404.74	0.008		808.903	1.11274
2403.31	0.0094	2403.31	0.00678		2403.31	0.0097	2403.31	0.00731		2403.31	0.00501	2403.31	0.00425		2403.31	0.00925	2403.31	0.01073		2403.31	0.01421	2403.31	0.01083		806.348	2.4477	806.348	2.59796		2403.31	0.01104	2403.31	0.0084		806.046	1.10848
2401.88	0.01019	2401.88	0.00666		2401.88	0.01123	2401.88	0.00857		2401.88	0.00513	2401.88	0.00384		2401.88	0.00927	2401.88	0.01037		2401.88	0.01604	2401.88	0.01134		803.489	2.42728	803.489	2.55099		2401.88	0.01162	2401.88	0.0084		803.189	1.09686
2400.45	0.01112	2400.45	0.00646		2400.45	0.01216	2400.45	0.00922		2400.45	0.00665	2400.45	0.00458		2400.45	0.00921	2400.45	0.00963		2400.45	0.01676	2400.45	0.01109		800.629	2.35683	800.629	2.53217		2400.45	0.01191	2400.45	0.00801		800.332	1.08111
2399.02	0.01194	2399.02	0.00625		2399.02	0.01224	2399.02	0.00911		2399.02	0.00925	2399.02	0.00636		2399.02	0.0091	2399.02	0.00864		2399.02	0.01621	2399.02	0.01022		797.77	2.32999	797.77	2.57104		2399.02	0.01188	2399.02	0.00745		797.475	1.06774
2397.59	0.01237	2397.59	0.00602		2397.59	0.01136	2397.59	0.00819		2397.59	0.01211	2397.59	0.00859		2397.59	0.00896	2397.59	0.00761		2397.59	0.01448	2397.59	0.00888		794.91	2.36084	794.91	2.6422		2397.59	0.01158	2397.59	0.00696		794.617	1.0678
2396.16	0.01225	2396.16	0.00581		2396.16	0.00974	2396.16	0.00674		2396.16	0.01441	2396.16	0.01064		2396.16	0.00881	2396.16	0.00672		2396.16	0.012	2396.16	0.00736		792.051	2.43454	792.051	2.66975		2396.16	0.01113	2396.16	0.00669		791.76	1.07075
2394.73	0.01156	2394.73	0.00566		2394.73	0.00783	2394.73	0.00522		2394.73	0.0155	2394.73	0.0119		2394.73	0.0087	2394.73	0.00608		2394.73	0.00938	2394.73	0.00602		789.192	2.55165	789.192	2.67803		2394.73	0.01061	2394.73	0.00665		788.903	1.06584
2393.3	0.01046	2393.3	0.00559		2393.3	0.00615	2393.3	0.00404		2393.3	0.01506	2393.3	0.01196		2393.3	0.00858	2393.3	0.00575		2393.3	0.00719	2393.3	0.00513		786.332	2.53415	786.332	2.66329		2393.3	0.01008	2393.3	0.00675		786.046	1.05321
2391.87	0.00915	2391.87	0.00553		2391.87	0.00507	2391.87	0.00343		2391.87	0.01319	2391.87	0.01073		2391.87	0.00845	2391.87	0.0057		2391.87	0.00589	2391.87	0.00484		783.473	2.53541	783.473	2.66339		2391.87	0.00958	2391.87	0.00689		783.189	1.03948
2390.44	0.00788	2390.44	0.0054		2390.44	0.00472	2390.44	0.00343		2390.44	0.01035	2390.44	0.00851		2390.44	0.00829	2390.44	0.00588		2390.44	0.00563	2390.44	0.00513		780.613	2.57054	780.613	2.64513		2390.44	0.00911	2390.44	0.00696		780.331	1.02445
2389.01	0.00683	2389.01	0.00514		2389.01	0.00499	2389.01	0.00383		2389.01	0.00723	2389.01	0.00589		2389.01	0.00808	2389.01	0.00621		2389.01	0.00631	2389.01	0.0058		777.754	2.61168	777.754	2.63549		2389.01	0.00869	2389.01	0.0069		777.474	1.00866
2387.58	0.00615	2387.58	0.00473		2387.58	0.00564	2387.58	0.00437		2387.58	0.00461	2387.58	0.00356		2387.58	0.00775	2387.58	0.00657		2387.58	0.00752	2387.58	0.00652		774.895	2.63139	774.895	2.64319		2387.58	0.00833	2387.58	0.00663		774.617	0.99475
2386.15	0.0059	2386.15	0.00422		2386.15	0.00636	2386.15	0.00479		2386.15	0.00307	2386.15	0.0021		2386.15	0.00732	2386.15	0.00689		2386.15	0.00876	2386.15	0.00698		772.035	2.6919	772.035	2.68235		2386.15	0.00803	2386.15	0.0061		771.76	0.98488
2384.72	0.00605	2384.72	0.0037		2384.72	0.00685	2384.72	0.00492		2384.72	0.00293	2384.72	0.00183		2384.72	0.00683	2384.72	0.00714		2384.72	0.0096	2384.72	0.00699		769.176	2.68771	769.176	2.68712		2384.72	0.00773	2384.72	0.00532		768.903	0.97238
2383.29	0.00649	2383.29	0.00326		2383.29	0.00689	2383.29	0.00468		2383.29	0.00412	2383.29	0.00276		2383.29	0.00635	2383.29	0.00729		2383.29	0.00976	2383.29	0.00652		766.316	2.56563	766.316	2.6514		2383.29	0.00737	2383.29	0.00443		766.045	0.95665
2381.86	0.00702	2381.86	0.00295		2381.86	0.00633	2381.86	0.00408		2381.86	0.00622	2381.86	0.00454		2381.86	0.00589	2381.86	0.00717		2381.86	0.00912	2381.86	0.0056		763.457	2.44178	763.457	2.56932		2381.86	0.00696	2381.86	0.00367		763.188	0.94098
2380.43	0.00738	2380.43	0.00275		2380.43	0.00518	2380.43	0.00312		2380.43	0.00854	2380.43	0.00656		2380.43	0.00541	2380.43	0.00663		2380.43	0.00764	2380.43	0.00429		760.598	2.41551	760.598	2.54145		2380.43	0.00655	2380.43	0.00324		760.331	0.92325
2379	0.00732	2379	0.00262		2379	0.00357	2379	0.00194		2379	0.01034	2379	0.00814		2379	0.00484	2379	0.00558		2379	0.00544	2379	0.00273		757.738	2.43977	757.738	2.5663		2379	0.00613	2379	0.00314		757.474	0.9131
2377.57	0.00669	2377.57	0.00252		2377.57	0.00189	2377.57	0.00081		2377.57	0.01102	2377.57	0.00874		2377.57	0.00417	2377.57	0.00419		2377.57	0.00287	2377.57	0.00124		754.879	2.47621	754.879	2.59384		2377.57	0.00558	2377.57	0.00316		754.617	0.90988
2376.14	0.00553	2376.14	0.00244		2376.14	0.00058	2376.14	3e-05		2376.14	0.01032	2376.14	0.00816		2376.14	0.00347	2376.14	0.00271		2376.14	0.00048	2376.14	0.00016		752.02	2.52797	752.02	2.59579		2376.14	0.00471	2376.14	0.00294		751.759	0.89809
2374.71	0.00399	2374.71	0.00224		2374.71	-0.00011	2374.71	-0.00027		2374.71	0.00831	2374.71	0.00654		2374.71	0.00276	2374.71	0.00128		2374.71	-0.00115	2374.71	-0.00032		749.16	2.45954	749.16	2.58894		2374.71	0.00331	2374.71	0.00217		748.902	0.88708
2373.28	0.00221	2373.28	0.0017		2373.28	-0.00032	2373.28	-0.00036		2373.28	0.00537	2373.28	0.0042		2373.28	0.00194	2373.28	-0.00019		2373.28	-0.00168	2373.28	-0.00034		746.301	2.41328	746.301	2.56362		2373.28	0.00126	2373.28	0.00071		746.045	0.86358
2371.85	0.00026	2371.85	0.00061		2371.85	-0.00042	2371.85	-0.00059		2371.85	0.00202	2371.85	0.00156		2371.85	0.00084	2371.85	-0.00181		2371.85	-0.0011	2371.85	-0.00014		743.441	2.43821	743.441	2.5353		2371.85	-0.00134	2371.85	-0.00135		743.188	0.82911
2370.42	-0.00178	2370.42	-0.00098		2370.42	-0.0008	2370.42	-0.00115		2370.42	-0.00123	2370.42	-0.00097		2370.42	-0.00059	2370.42	-0.00346		2370.42	9e-05	2370.42	-1e-05		740.582	2.53555	740.582	2.50888		2370.42	-0.00424	2370.42	-0.00378		740.331	0.77961
2368.99	-0.00377	2368.99	-0.00276		2368.99	-0.00174	2368.99	-0.00208		2368.99	-0.00388	2368.99	-0.00297		2368.99	-0.00231	2368.99	-0.00491		2368.99	0.00095	2368.99	-0.00022		737.723	2.5687	737.723	2.51218		2368.99	-0.00712	2368.99	-0.00635		737.473	0.72947
2367.56	-0.00556	2367.56	-0.00439		2367.56	-0.0033	2367.56	-0.00331		2367.56	-0.00538	2367.56	-0.00403		2367.56	-0.00427	2367.56	-0.0061		2367.56	0.00048	2367.56	-0.001		734.863	2.52997	734.863	2.55906		2367.56	-0.00969	2367.56	-0.00879		734.616	0.68321
2366.13	-0.00701	2366.13	-0.00569		2366.13	-0.00522	2366.13	-0.00464		2366.13	-0.0055	2366.13	-0.00393		2366.13	-0.00619	2366.13	-0.00702		2366.13	-0.00159	2366.13	-0.00236		732.004	2.52117	732.004	2.60988		2366.13	-0.01167	2366.13	-0.01071		731.759	0.62894
2364.7	-0.00812	2364.7	-0.00661		2364.7	-0.00719	2364.7	-0.00579		2364.7	-0.00463	2364.7	-0.00293		2364.7	-0.00767	2364.7	-0.00766		2364.7	-0.00467	2364.7	-0.0041		729.144	2.55371	729.144	2.53252		2364.7	-0.01281	2364.7	-0.01177		728.902	0.58505
2363.28	-0.00894	2363.28	-0.00715		2363.28	-0.00917	2363.28	-0.00674		2363.28	-0.00354	2363.28	-0.00167		2363.28	-0.00861	2363.28	-0.0081		2363.28	-0.00797	2363.28	-0.00596		726.285	2.53956	726.285	2.54514		2363.28	-0.01306	2363.28	-0.01187		726.045	0.55991
2361.85	-0.00956	2361.85	-0.00729		2361.85	-0.01111	2361.85	-0.00757		2361.85	-0.00289	2361.85	-0.0008		2361.85	-0.00932	2361.85	-0.00848		2361.85	-0.01094	2361.85	-0.00762		723.426	2.50277	723.426	2.53378		2361.85	-0.01273	2361.85	-0.0113		723.187	0.52174
2360.42	-0.00986	2360.42	-0.00704		2360.42	-0.01215	2360.42	-0.00797		2360.42	-0.0029	2360.42	-0.00067		2360.42	-0.00987	2360.42	-0.00857		2360.42	-0.01264	2360.42	-0.00839		720.566	2.39505	720.566	2.50412		2360.42	-0.01227	2360.42	-0.01053		720.33	0.48339
2358.99	-0.00938	2358.99	-0.00629		2358.99	-0.01108	2358.99	-0.00729		2358.99	-0.00336	2358.99	-0.00125		2358.99	-0.00971	2358.99	-0.00782		2358.99	-0.01173	2358.99	-0.00741		717.707	2.36163	717.707	2.48955		2358.99	-0.01176	2358.99	-0.00981		717.473	0.48132
2357.56	-0.00773	2357.56	-0.00496		2357.56	-0.00764	2357.56	-0.0053		2357.56	-0.00381	2357.56	-0.00213		2357.56	-0.00832	2357.56	-0.00602		2357.56	-0.00765	2357.56	-0.00447		714.847	2.39861	714.847	2.48932		2357.56	-0.01085	2357.56	-0.00906		714.616	0.49597
2356.13	-0.0055	2356.13	-0.00336		2356.13	-0.00322	2356.13	-0.00267		2356.13	-0.0041	2356.13	-0.00291		2356.13	-0.00609	2356.13	-0.00381		2356.13	-0.00221	2356.13	-0.00064		711.988	2.47797	711.988	2.50688		2356.13	-0.0095	2356.13	-0.00821		711.759	0.5042
2354.7	-0.00418	2354.7	-0.0024		2354.7	-0.00026	2354.7	-0.00083		2354.7	-0.00446	2354.7	-0.00338		2354.7	-0.0043	2354.7	-0.00264		2354.7	0.00089	2354.7	0.00185		709.129	2.51771	709.129	2.52486		2354.7	-0.00831	2354.7	-0.00754		708.901	0.54671
2353.27	-0.00473	2353.27	-0.00268		2353.27	-0.00066	2353.27	-0.00106		2353.27	-0.00466	2353.27	-0.00327		2353.27	-0.00423	2353.27	-0.00377		2353.27	-0.00118	2353.27	0.00106		706.269	2.59552	706.269	2.54334		2353.27	-0.00793	2353.27	-0.00734		706.044	0.57262
2351.84	-0.0064	2351.84	-0.0038		2351.84	-0.00411	2351.84	-0.00323		2351.84	-0.00387	2351.84	-0.00221		2351.84	-0.00585	2351.84	-0.00688		2351.84	-0.00752	2351.84	-0.00274		703.41	2.66681	703.41	2.56887		2351.84	-0.00817	2351.84	-0.00746		703.187	0.5852
2350.41	-0.00749	2350.41	-0.00467		2350.41	-0.00795	2350.41	-0.00551		2350.41	-0.00192	2350.41	-0.00038		2350.41	-0.00767	2350.41	-0.00988		2350.41	-0.0137	2350.41	-0.00681		700.551	2.63682	700.551	2.58895		2350.41	-0.00832	2350.41	-0.00744		700.33	0.56795
2348.98	-0.00689	2348.98	-0.00461		2348.98	-0.00924	2348.98	-0.00579		2348.98	0.00019	2348.98	0.0014		2348.98	-0.00798	2348.98	-0.01055		2348.98	-0.01524	2348.98	-0.00815		697.691	2.58144	697.691	2.55811		2348.98	-0.0078	2348.98	-0.00692		697.473	0.5442
2347.55	-0.00464	2347.55	-0.0036		2347.55	-0.00714	2347.55	-0.00358		2347.55	0.00155	2347.55	0.00244		2347.55	-0.00631	2347.55	-0.00828		2347.55	-0.0109	2347.55	-0.00585		694.832	2.63183	694.832	2.49972		2347.55	-0.00647	2347.55	-0.00577		694.615	0.51484
2346.12	-0.00166	2346.12	-0.00207		2346.12	-0.00344	2346.12	-0.00038		2346.12	0.00224	2346.12	0.00277		2346.12	-0.00375	2346.12	-0.00452		2346.12	-0.00367	2346.12	-0.00174		691.972	2.51366	691.972	2.44116		2346.12	-0.00463	2346.12	-0.0042		691.758	0.4701
2344.69	0.00063	2344.69	-0.00065		2344.69	-0.00097	2344.69	0.00148		2344.69	0.00283	2344.69	0.00282		2344.69	-0.00195	2344.69	-0.00157		2344.69	0.00147	2344.69	0.00112		689.113	2.41286	689.113	2.46928		2344.69	-0.00292	2344.69	-0.00268		688.901	0.39722
2343.26	0.0011	2343.26	0.00011		2343.26	-0.00113	2343.26	0.00089		2343.26	0.00308	2343.26	0.00261		2343.26	-0.00164	2343.26	-0.00067		2343.26	0.0014	2343.26	0.00095		686.254	2.47691	686.254	2.54538		2343.26	-0.00207	2343.26	-0.0018		686.044	0.3299
2341.83	-0.00025	2341.83	5e-05		2341.83	-0.00294	2341.83	-0.00128		2341.83	0.00233	2341.83	0.00185		2341.83	-0.00222	2341.83	-0.00127		2341.83	-0.00282	2341.83	-0.00139		683.394	2.46013	683.394	2.536		2341.83	-0.00238	2341.83	-0.00193		683.187	0.2784
2340.4	-0.00237	2340.4	-0.00054		2340.4	-0.00459	2340.4	-0.00348		2340.4	0.00073	2340.4	0.00067		2340.4	-0.00279	2340.4	-0.00218		2340.4	-0.00758	2340.4	-0.00384		680.535	2.39564	680.535	2.50842		2340.4	-0.0036	2340.4	-0.00295		680.329	0.23134
2338.97	-0.00421	2338.97	-0.00132		2338.97	-0.00517	2338.97	-0.00482		2338.97	-0.00098	2338.97	-0.00043		2338.97	-0.00307	2338.97	-0.00274		2338.97	-0.01007	2338.97	-0.00506		677.675	2.41489	677.675	2.45271		2338.97	-0.00536	2338.97	-0.00452		677.472	0.16567
2337.54	-0.00532	2337.54	-0.00213		2337.54	-0.00475	2337.54	-0.00501		2337.54	-0.0023	2337.54	-0.00113		2337.54	-0.00314	2337.54	-0.0029		2337.54	-0.00954	2337.54	-0.00484		674.816	2.34264	674.816	2.36399		2337.54	-0.00731	2337.54	-0.00631		674.615	0.10454
2336.11	-0.00563	2336.11	-0.00284		2336.11	-0.0038	2336.11	-0.00416		2336.11	-0.00301	2336.11	-0.00131		2336.11	-0.00314	2336.11	-0.00278		2336.11	-0.00677	2336.11	-0.00359		671.957	2.28224	671.957	2.29367		2336.11	-0.00895	2336.11	-0.00791		671.758	0.07294
2334.68	-0.00523	2334.68	-0.00332		2334.68	-0.00285	2334.68	-0.00266		2334.68	-0.00307	2334.68	-0.00108		2334.68	-0.00312	2334.68	-0.00262		2334.68	-0.0032	2334.68	-0.00194		669.097	2.23186	669.097	2.27732		2334.68	-0.00979	2334.68	-0.00884		668.901	0.07202
2333.25	-0.00438	2333.25	-0.00352		2333.25	-0.00234	2333.25	-0.0011		2333.25	-0.00251	2333.25	-0.00056		2333.25	-0.00315	2333.25	-0.00262		2333.25	-0.00029	2333.25	-0.00053		666.238	2.22337	666.238	2.32703		2333.25	-0.00956	2333.25	-0.00873		666.043	0.07538
2331.82	-0.00332	2331.82	-0.00336		2331.82	-0.00239	2331.82	-1e-05		2331.82	-0.00141	2331.82	0.00014		2331.82	-0.00326	2331.82	-0.00284		2331.82	0.00106	2331.82	0.00024		663.378	2.27008	663.378	2.37579		2331.82	-0.00821	2331.82	-0.00746		663.186	0.09587
2330.39	-0.00223	2330.39	-0.00275		2330.39	-0.00282	2330.39	0.00028		2330.39	0.00011	2330.39	0.00098		2330.39	-0.00342	2330.39	-0.00315		2330.39	0.00059	2330.39	0.00021		660.519	2.34035	660.519	2.34099		2330.39	-0.00599	2330.39	-0.00529		660.329	0.13532
2328.96	-0.00125	2328.96	-0.00176		2328.96	-0.00337	2328.96	-0.00033		2328.96	0.00176	2328.96	0.0018		2328.96	-0.00362	2328.96	-0.00345		2328.96	-0.00142	2328.96	-0.00056		657.66	2.35244	657.66	2.29898		2328.96	-0.00342	2328.96	-0.00275		657.472	0.17343
2327.53	-0.00047	2327.53	-0.00061		2327.53	-0.00379	2327.53	-0.00157		2327.53	0.00315	2327.53	0.00245		2327.53	-0.00376	2327.53	-0.00361		2327.53	-0.00423	2327.53	-0.00173		654.8	2.33959	654.8	2.30195		2327.53	-0.00114	2327.53	-0.00051		654.615	0.21696
2326.1	9e-05	2326.1	0.00044		2326.1	-0.00376	2326.1	-0.00281		2326.1	0.00399	2326.1	0.00281		2326.1	-0.00363	2326.1	-0.00344		2326.1	-0.00669	2326.1	-0.00272		651.941	2.21748	651.941	2.31487		2326.1	0.00045	2326.1	0.00096		651.757	0.22649
2324.67	0.00055	2324.67	0.00122		2324.67	-0.00292	2324.67	-0.00331		2324.67	0.00416	2324.67	0.00287		2324.67	-0.00292	2324.67	-0.00271		2324.67	-0.00748	2324.67	-0.00295		649.081	2.16712	649.081	2.33966		2324.67	0.00117	2324.67	0.00146		648.9	0.21799
2323.24	0.00096	2323.24	0.00159		2323.24	-0.0012	2323.24	-0.00261		2323.24	0.00372	2323.24	0.00269		2323.24	-0.00152	2323.24	-0.00137		2323.24	-0.00592	2323.24	-0.00215		646.222	2.16351	646.222	2.34628		2323.24	0.00105	2323.24	0.00099		646.043	0.23438
2321.81	0.00125	2321.81	0.00148		2321.81	0.00097	2321.81	-0.00093		2321.81	0.00293	2321.81	0.00234		2321.81	0.0003	2321.81	0.0002		2321.81	-0.00245	2321.81	-0.0006		643.363	2.12047	643.363	2.28976		2321.81	0.0002	2321.81	-0.00024		643.186	0.26881
2320.38	0.00134	2320.38	0.00096		2320.38	0.0028	2320.38	0.00107		2320.38	0.00218	2320.38	0.00203		2320.38	0.00204	2320.38	0.00151		2320.38	0.00155	2320.38	0.00106		640.503	2.0737	640.503	2.21969		2320.38	-0.00114	2320.38	-0.00182		640.329	0.30228
2318.95	0.00129	2318.95	0.00032		2318.95	0.00372	2318.95	0.00272		2318.95	0.00187	2318.95	0.00194		2318.95	0.00337	2318.95	0.00237		2318.95	0.00468	2318.95	0.00236		637.644	2.04377	637.644	2.17921		2318.95	-0.00252	2318.95	-0.00313		637.471	0.313
2317.52	0.00126	2317.52	-0.00014		2317.52	0.00376	2317.52	0.00372		2317.52	0.00207	2317.52	0.00212		2317.52	0.00428	2317.52	0.00303		2317.52	0.00642	2317.52	0.00324		634.785	2.05165	634.785	2.16945		2317.52	-0.00324	2317.52	-0.00349		634.614	0.30695
2316.1	0.00143	2316.1	-0.00024		2316.1	0.00328	2316.1	0.00407		2316.1	0.00256	2316.1	0.00239		2316.1	0.00493	2316.1	0.00383		2316.1	0.00701	2316.1	0.00389		631.925	2.08544	631.925	2.17541		2316.1	-0.00274	2316.1	-0.00252		631.757	0.30153
2314.67	0.00192	2314.67	4e-05		2314.67	0.00263	2314.67	0.00379		2314.67	0.00319	2314.67	0.00265		2314.67	0.00543	2314.67	0.00479		2314.67	0.00688	2314.67	0.00434		629.066	2.1154	629.066	2.19283		2314.67	-0.00084	2314.67	-0.0003		628.9	0.30234
2313.24	0.00278	2313.24	0.00069		2313.24	0.00205	2313.24	0.00293		2313.24	0.00398	2313.24	0.00294		2313.24	0.00573	2313.24	0.00564		2313.24	0.00616	2313.24	0.00438		626.206	2.14673	626.206	2.2213		2313.24	0.00207	2313.24	0.00265		626.043	0.30972
2311.81	0.00392	2311.81	0.00166		2311.81	0.00167	2311.81	0.0017		2311.81	0.00498	2311.81	0.00337		2311.81	0.00576	2311.81	0.00616		2311.81	0.00477	2311.81	0.00385		623.347	2.16413	623.347	2.2686		2311.81	0.00526	2311.81	0.00558		623.185	0.30757
2310.38	0.00509	2310.38	0.00277		2310.38	0.00167	2310.38	0.00058		2310.38	0.00607	2310.38	0.00396		2310.38	0.00553	2310.38	0.00631		2310.38	0.00287	2310.38	0.00283		620.488	2.16281	620.488	2.28309		2310.38	0.00793	2310.38	0.00779		620.328	0.30159
2308.95	0.00601	2308.95	0.00373		2308.95	0.00216	2308.95	6e-05		2308.95	0.00696	2308.95	0.00457		2308.95	0.0051	2308.95	0.00616		2308.95	0.00101	2308.95	0.00169		617.628	2.14173	617.628	2.2361		2308.95	0.00943	2308.95	0.00879		617.471	0.29054
2307.52	0.00647	2307.52	0.00426		2307.52	0.00309	2307.52	0.00045		2307.52	0.00739	2307.52	0.00504		2307.52	0.00458	2307.52	0.00579		2307.52	-8e-05	2307.52	0.00086		614.769	2.10436	614.769	2.17684		2307.52	0.00943	2307.52	0.00839		614.614	0.28477
2306.09	0.00653	2306.09	0.00428		2306.09	0.00427	2306.09	0.00167		2306.09	0.00738	2306.09	0.00531		2306.09	0.00418	2306.09	0.0054		2306.09	0.0002	2306.09	0.00068		611.909	2.0918	611.909	2.13914		2306.09	0.00805	2306.09	0.00681		611.757	0.28672
2304.66	0.00643	2304.66	0.00395		2304.66	0.00551	2304.66	0.00344		2304.66	0.00715	2304.66	0.00545		2304.66	0.00416	2304.66	0.00523		2304.66	0.00203	2304.66	0.00136		609.05	2.09344	609.05	2.14128		2304.66	0.0058	2304.66	0.00458		608.899	0.29524
2303.23	0.00638	2303.23	0.00351		2303.23	0.00662	2303.23	0.00531		2303.23	0.0069	2303.23	0.00548		2303.23	0.00463	2303.23	0.0054		2303.23	0.00509	2303.23	0.00284		606.191	2.07671	606.191	2.15279		2303.23	0.0034	2303.23	0.00238		606.042	0.28181
2301.8	0.00641	2301.8	0.0031		2301.8	0.00736	2301.8	0.00671		2301.8	0.00664	2301.8	0.0053		2301.8	0.00545	2301.8	0.00579		2301.8	0.00863	2301.8	0.00478		603.331	2.00192	603.331	2.10315		2301.8	0.00157	2301.8	0.00089		603.185	0.26178
2300.37	0.00645	2300.37	0.00278		2300.37	0.00753	2300.37	0.00717		2300.37	0.00633	2300.37	0.00486		2300.37	0.00639	2300.37	0.00616		2300.37	0.01166	2300.37	0.00659		600.472	1.95595	600.472	2.02081		2300.37	0.00089	2300.37	0.0006		600.328	0.25386
2298.94	0.00646	2298.94	0.00264		2298.94	0.00706	2298.94	0.0065		2298.94	0.00598	2298.94	0.00423		2298.94	0.00729	2298.94	0.00647		2298.94	0.01335	2298.94	0.00779		597.612	1.90402	597.612	1.96127		2298.94	0.00165	2298.94	0.00169		597.471	0.28775
2297.51	0.00649	2297.51	0.00275		2297.51	0.00621	2297.51	0.005		2297.51	0.00575	2297.51	0.00364		2297.51	0.00816	2297.51	0.00685		2297.51	0.01337	2297.51	0.0081		594.753	1.88122	594.753	1.9225		2297.51	0.00377	2297.51	0.00399		594.613	0.32712
2296.08	0.00665	2296.08	0.00313		2296.08	0.00537	2296.08	0.00325		2296.08	0.00585	2296.08	0.00338		2296.08	0.00907	2296.08	0.00745		2296.08	0.01186	2296.08	0.00749		591.894	1.87535	591.894	1.89374		2296.08	0.00681	2296.08	0.00693		591.756	0.33247
2294.65	0.00702	2294.65	0.00374		2294.65	0.00492	2294.65	0.00192		2294.65	0.00642	2294.65	0.00366		2294.65	0.01002	2294.65	0.0083		2294.65	0.00937	2294.65	0.00616		589.034	1.83778	589.034	1.87694		2294.65	0.01003	2294.65	0.00978		588.899	0.32507
2293.22	0.00759	2293.22	0.00444		2293.22	0.00506	2293.22	0.00152		2293.22	0.0074	2293.22	0.00449		2293.22	0.01088	2293.22	0.00933		2293.22	0.00664	2293.22	0.0045		586.175	1.72356	586.175	1.87061		2293.22	0.0126	2293.22	0.01179		586.042	0.32347
2291.79	0.00825	2291.79	0.00509		2291.79	0.0058	2291.79	0.00225		2291.79	0.00854	2291.79	0.00566		2291.79	0.01151	2291.79	0.01039		2291.79	0.00452	2291.79	0.00304		583.316	1.59627	583.316	1.84623		2291.79	0.01385	2291.79	0.01246		583.185	0.30516
2290.36	0.00886	2290.36	0.00551		2290.36	0.00696	2290.36	0.0039		2290.36	0.00954	2290.36	0.0068		2290.36	0.01173	2290.36	0.01131		2290.36	0.00367	2290.36	0.00225		580.456	1.486	580.456	1.74892		2290.36	0.01344	2290.36	0.01163		580.327	0.28389
2288.93	0.00928	2288.93	0.00559		2288.93	0.00822	2288.93	0.00588		2288.93	0.01019	2288.93	0.00757		2288.93	0.01147	2288.93	0.01192		2288.93	0.00435	2288.93	0.00238		577.597	1.44331	577.597	1.58256		2288.93	0.01147	2288.93	0.00956		577.47	0.28411
2287.5	0.00946	2287.5	0.00534		2287.5	0.00921	2287.5	0.00753		2287.5	0.01037	2287.5	0.00777		2287.5	0.01078	2287.5	0.01211		2287.5	0.00634	2287.5	0.00343		574.737	1.37642	574.737	1.43278		2287.5	0.00852	2287.5	0.00686		574.613	0.30363
2286.07	0.00942	2286.07	0.00489		2286.07	0.00966	2286.07	0.00833		2286.07	0.01007	2286.07	0.0074		2286.07	0.00985	2286.07	0.01187		2286.07	0.00911	2286.07	0.00514		571.878	1.31815	571.878	1.34238		2286.07	0.00546	2286.07	0.00438		571.756	0.3203
2284.64	0.00924	2284.64	0.00445		2284.64	0.00949	2284.64	0.00811		2284.64	0.00938	2284.64	0.0066		2284.64	0.00892	2284.64	0.01129		2284.64	0.01197	2284.64	0.00713		569.019	1.28541	569.019	1.27798		2284.64	0.00324	2284.64	0.00293		568.899	0.32542
2283.21	0.00898	2283.21	0.00419		2283.21	0.00883	2283.21	0.00704		2283.21	0.00846	2283.21	0.00559		2283.21	0.0082	2283.21	0.01052		2283.21	0.01425	2283.21	0.00888		566.159	1.14107	566.159	1.21489		2283.21	0.00259	2283.21	0.00299		566.041	0.33133
2281.78	0.00872	2281.78	0.00418		2281.78	0.00793	2281.78	0.00553		2281.78	0.00757	2281.78	0.00466		2281.78	0.00783	2281.78	0.00974		2281.78	0.01543	2281.78	0.00995		563.3	1.05065	563.3	1.15451		2281.78	0.00378	2281.78	0.00458		563.184	0.32533
2280.35	0.00853	2280.35	0.0044		2280.35	0.0071	2280.35	0.00411		2280.35	0.00699	2280.35	0.00408		2280.35	0.00786	2280.35	0.00907		2280.35	0.01521	2280.35	0.01002		560.44	1.05704	560.44	1.10234		2280.35	0.00649	2280.35	0.00726		560.327	0.32172
2278.92	0.00846	2278.92	0.00477		2278.92	0.00657	2278.92	0.00327		2278.92	0.00689	2278.92	0.00406		2278.92	0.00822	2278.92	0.00858		2278.92	0.01365	2278.92	0.00907		557.581	1.00227	557.581	1.09436		2278.92	0.00997	2278.92	0.01033		557.47	0.33393
2277.49	0.00853	2277.49	0.0052		2277.49	0.00655	2277.49	0.0033		2277.49	0.00733	2277.49	0.00467		2277.49	0.00885	2277.49	0.00833		2277.49	0.01119	2277.49	0.00735		554.722	0.9678	554.722	1.0908		2277.49	0.01326	2277.49	0.01297		554.613	0.3325
2276.06	0.0088	2276.06	0.00562		2276.06	0.00709	2276.06	0.00423		2276.06	0.00825	2276.06	0.00581		2276.06	0.00968	2276.06	0.00838		2276.06	0.00854	2276.06	0.00539		551.862	0.88002	551.862	0.99032		2276.06	0.01551	2276.06	0.01451		551.755	0.32021
2274.63	0.00925	2274.63	0.00595		2274.63	0.00809	2274.63	0.00574		2274.63	0.00947	2274.63	0.00717		2274.63	0.01067	2274.63	0.00879		2274.63	0.0065	2274.63	0.00384		549.003	0.82742	549.003	0.90439		2274.63	0.01613	2274.63	0.01455		548.898	0.31722
2273.2	0.0098	2273.2	0.0061		2273.2	0.00922	2273.2	0.0073		2273.2	0.01068	2273.2	0.00834		2273.2	0.01175	2273.2	0.0096		2273.2	0.00571	2273.2	0.00316		546.143	0.77621	546.143	0.87904		2273.2	0.01498	2273.2	0.01308		546.041	0.29044
2271.77	0.01032	2271.77	0.00605		2271.77	0.01018	2271.77	0.00839		2271.77	0.01154	2271.77	0.00897		2271.77	0.01284	2271.77	0.01078		2271.77	0.00645	2271.77	0.00357		543.284	0.69138	543.284	0.83834		2271.77	0.01234	2271.77	0.01048		543.184	0.29929
2270.35	0.01069	2270.35	0.00584		2270.35	0.01067	2270.35	0.00865		2270.35	0.01179	2270.35	0.0089		2270.35	0.01379	2270.35	0.01221		2270.35	0.00846	2270.35	0.00497		540.425	0.67452	540.425	0.73869		2270.35	0.00889	2270.35	0.00753		540.327	0.30025
2268.92	0.01084	2268.92	0.00559		2268.92	0.01057	2268.92	0.00802		2268.92	0.01134	2268.92	0.00816		2268.92	0.01443	2268.92	0.01366		2268.92	0.01118	2268.92	0.00698		537.565	0.6548	537.565	0.6721		2268.92	0.00564	2268.92	0.00512		537.469	0.29371
2267.49	0.01079	2267.49	0.00545		2267.49	0.00993	2267.49	0.00678		2267.49	0.01036	2267.49	0.007		2267.49	0.01464	2267.49	0.01489		2267.49	0.01384	2267.49	0.00905		534.706	0.59551	534.706	0.64514		2267.49	0.00355	2267.49	0.00394		534.612	0.28345
2266.06	0.01057	2266.06	0.00551		2266.06	0.00896	2266.06	0.00538		2266.06	0.0091	2266.06	0.00576		2266.06	0.01435	2266.06	0.01563		2266.06	0.0157	2266.06	0.01058		531.846	0.54551	531.846	0.63917		2266.06	0.00333	2266.06	0.00443		531.755	0.27342
2264.63	0.01026	2264.63	0.00578		2264.63	0.00802	2264.63	0.00436		2264.63	0.00792	2264.63	0.00481		2264.63	0.01361	2264.63	0.01573		2264.63	0.01625	2264.63	0.01112		528.987	0.53528	528.987	0.60553		2264.63	0.00509	2264.63	0.00648		528.898	0.27218
2263.2	0.00992	2263.2	0.00612		2263.2	0.00742	2263.2	0.00408		2263.2	0.00717	2263.2	0.00445		2263.2	0.01254	2263.2	0.01514		2263.2	0.01536	2263.2	0.01049		526.128	0.55887	526.128	0.5271		2263.2	0.00837	2263.2	0.00946		526.041	0.28121
2261.77	0.00955	2261.77	0.00638		2261.77	0.00738	2261.77	0.00466		2261.77	0.00714	2261.77	0.00484		2261.77	0.01136	2261.77	0.014		2261.77	0.01332	2261.77	0.0089		523.268	0.52675	523.268	0.42874		2261.77	0.01219	2261.77	0.01248		523.183	0.30213
2260.34	0.00921	2260.34	0.00649		2260.34	0.0079	2260.34	0.00586		2260.34	0.00787	2260.34	0.00593		2260.34	0.01032	2260.34	0.01255		2260.34	0.01073	2260.34	0.00685		520.409	0.44525	520.409	0.3581		2260.34	0.01549	2260.34	0.01472		520.326	0.32027
2258.91	0.00904	2258.91	0.00643		2258.91	0.0088	2258.91	0.00721		2258.91	0.00919	2258.91	0.00736		2258.91	0.00964	2258.91	0.01109		2258.91	0.00832	2258.91	0.00497		517.55	0.25411	517.55	0.35119		2258.91	0.01736	2258.91	0.0156		517.469	0.30571
2257.48	0.00917	2257.48	0.00631		2257.48	0.00982	2257.48	0.00826		2257.48	0.0107	2257.48	0.00868		2257.48	0.00946	2257.48	0.0099		2257.48	0.00674	2257.48	0.00379		514.69	0.30954	514.69	0.36408		2257.48	0.01731	2257.48	0.01486		514.612	0.28648
2256.05	0.00964	2256.05	0.00617		2256.05	0.01064	2256.05	0.00867		2256.05	0.01197	2256.05	0.0095		2256.05	0.00978	2256.05	0.00916		2256.05	0.00647	2256.05	0.00367		511.831	0.37543	511.831	0.3358		2256.05	0.01536	2256.05	0.0127		511.755	0.26245
2254.62	0.01035	2254.62	0.00606		2254.62	0.01099	2254.62	0.00831		2254.62	0.01267	2254.62	0.00966		2254.62	0.01049	2254.62	0.00893		2254.62	0.00759	2254.62	0.00462		508.971	0.37612	508.971	0.2885		2254.62	0.012	2254.62	0.00968		508.897	0.24505
2253.19	0.01111	2253.19	0.006		2253.19	0.01075	2253.19	0.00729		2253.19	0.01267	2253.19	0.00918		2253.19	0.01143	2253.19	0.00921		2253.19	0.00979	2253.19	0.00639		506.112	0.39871	506.112	0.2529		2253.19	0.00813	2253.19	0.00666		506.04	0.25869
2251.76	0.01171	2251.76	0.00606		2251.76	0.01	2251.76	0.00599		2251.76	0.01199	2251.76	0.00823		2251.76	0.01251	2251.76	0.01002		2251.76	0.01249	2251.76	0.00853		503.253	0.38743	503.253	0.21709		2251.76	0.00485	2251.76	0.00449		503.183	0.27685
2250.33	0.01205	2250.33	0.00632		2250.33	0.00912	2250.33	0.005		2250.33	0.01085	2250.33	0.00713		2250.33	0.01374	2250.33	0.01136		2250.33	0.01508	2250.33	0.01056		500.393	0.36122	500.393	0.22879		2250.33	0.00313	2250.33	0.00379		500.326	0.27539
2248.9	0.01209	2248.9	0.00677		2248.9	0.0085	2248.9	0.00477		2248.9	0.00955	2248.9	0.00617		2248.9	0.01503	2248.9	0.01315		2248.9	0.0169	2248.9	0.0119		497.534	0.3816	497.534	0.3042		2248.9	0.00353	2248.9	0.00475		497.469	0.27286
2247.47	0.01158	2247.47	0.0071		2247.47	0.00793	2247.47	0.00502		2247.47	0.00815	2247.47	0.0054		2247.47	0.01608	2247.47	0.01499		2247.47	0.01693	2247.47	0.01173		494.674	0.42279	494.674	0.3681		2247.47	0.00591	2247.47	0.00711		494.611	0.28516
2246.04	0.01084	2246.04	0.00733		2246.04	0.00792	2246.04	0.00591		2246.04	0.00732	2246.04	0.00529		2246.04	0.01676	2246.04	0.01669		2246.04	0.01555	2246.04	0.01039		491.815	0.46432	491.815	0.36355		2246.04	0.00952	2246.04	0.01017		491.754	0.29483
2244.61	0.00998	2244.61	0.00731		2244.61	0.00843	2244.61	0.00704		2244.61	0.00732	2244.61	0.00587		2244.61	0.01692	2244.61	0.01791		2244.61	0.01318	2244.61	0.00831		488.956	0.51923	488.956	0.32033		2244.61	0.01331	2244.61	0.01305		488.897	0.29553
2243.18	0.00914	2243.18	0.007		2243.18	0.00925	2243.18	0.00794		2243.18	0.00812	2243.18	0.00692		2243.18	0.01647	2243.18	0.01833		2243.18	0.01052	2243.18	0.00616		486.096	0.48822	486.096	0.28536		2243.18	0.01628	2243.18	0.01495		486.04	0.29714
2241.75	0.00852	2241.75	0.00648		2241.75	0.01013	2241.75	0.00828		2241.75	0.00948	2241.75	0.00805		2241.75	0.01545	2241.75	0.01783		2241.75	0.0083	2241.75	0.00454		483.237	0.4708	483.237	0.27376		2241.75	0.01758	2241.75	0.01532		483.183	0.26474
2240.32	0.00834	2240.32	0.00595		2240.32	0.01078	2240.32	0.00797		2240.32	0.01099	2240.32	0.00891		2240.32	0.01402	2240.32	0.01649		2240.32	0.00705	2240.32	0.0039		480.377	0.54207	480.377	0.28757		2240.32	0.01683	2240.32	0.01405		480.325	0.24738
2238.89	0.0087	2238.89	0.00557		2238.89	0.01099	2238.89	0.00713		2238.89	0.01225	2238.89	0.00925		2238.89	0.01242	2238.89	0.0146		2238.89	0.00707	2238.89	0.00439		477.518	0.51523	477.518	0.29655		2238.89	0.0142	2238.89	0.01149		477.468	0.25897
2237.46	0.00948	2237.46	0.00545		2237.46	0.01068	2237.46	0.00606		2237.46	0.01287	2237.46	0.00903		2237.46	0.01096	2237.46	0.01254		2237.46	0.00829	2237.46	0.00581		474.659	0.47315	474.659	0.26467		2237.46	0.01042	2237.46	0.00835		474.611	0.27072
2236.03	0.01049	2236.03	0.00564		2236.03	0.00993	2236.03	0.00512		2236.03	0.0127	2236.03	0.00838		2236.03	0.00995	2236.03	0.01071		2236.03	0.01038	2236.03	0.00773		471.799	0.43342	471.799	0.16279		2236.03	0.00649	2236.03	0.0055		471.754	0.27273
2234.6	0.01147	2234.6	0.00613		2234.6	0.00891	2234.6	0.00465		2234.6	0.01176	2234.6	0.00748		2234.6	0.00955	2234.6	0.00941		2234.6	0.01277	2234.6	0.00962		468.94	0.37052	468.94	0.08865		2234.6	0.00354	2234.6	0.00376		468.897	0.28551
2233.17	0.01217	2233.17	0.00681		2233.17	0.00798	2233.17	0.00483		2233.17	0.01033	2233.17	0.00656		2233.17	0.0098	2233.17	0.00878		2233.17	0.01482	2233.17	0.01096		466.081	0.36409	466.081	0.09082		2233.17	0.00247	2233.17	0.0036		466.039	0.26
2231.74	0.0124	2231.74	0.00751		2231.74	0.00747	2231.74	0.00559		2231.74	0.00878	2231.74	0.00585		2231.74	0.01057	2231.74	0.00887		2231.74	0.01597	2231.74	0.01133		463.221	0.36996	463.221	0.11464		2231.74	0.00365	2231.74	0.00505		463.182	0.23697
2230.31	0.01207	2230.31	0.00803		2230.31	0.00756	2230.31	0.00661		2230.31	0.00754	2230.31	0.00554		2230.31	0.01169	2230.31	0.00963		2230.31	0.01582	2230.31	0.01057		460.362	0.36606	460.362	0.09192		2230.31	0.00673	2230.31	0.00768		460.325	0.21713
2228.88	0.01126	2228.88	0.00819		2228.88	0.00816	2228.88	0.00747		2228.88	0.00696	2228.88	0.0057		2228.88	0.01302	2228.88	0.01098		2228.88	0.01434	2228.88	0.00889		457.502	0.40964	457.502	0.07083		2228.88	0.01075	2228.88	0.01071		457.468	0.20897
2227.45	0.01015	2227.45	0.00793		2227.45	0.00904	2227.45	0.00783		2227.45	0.00718	2227.45	0.00625		2227.45	0.01441	2227.45	0.01281		2227.45	0.01198	2227.45	0.00688		454.643	0.49009	454.643	0.1049		2227.45	0.01447	2227.45	0.01327		454.611	0.23007
2226.02	0.00899	2226.02	0.00732		2226.02	0.00985	2226.02	0.00755		2226.02	0.00809	2226.02	0.00701		2226.02	0.0157	2226.02	0.01489		2226.02	0.00948	2226.02	0.00521		451.784	0.51025	451.784	0.17256		2226.02	0.01689	2226.02	0.01467		451.753	0.2516
2224.6	0.00807	2224.6	0.0065		2224.6	0.01036	2224.6	0.00676		2224.6	0.0094	2224.6	0.00774		2224.6	0.01672	2224.6	0.01687		2224.6	0.00761	2224.6	0.00438		448.924	0.41786	448.924	0.23854		2224.6	0.01736	2224.6	0.01451		448.896	0.27243
2223.17	0.0076	2223.17	0.00571		2223.17	0.01042	2223.17	0.00578		2223.17	0.01077	2223.17	0.00821		2223.17	0.01733	2223.17	0.01836		2223.17	0.00682	2223.17	0.00454		446.065	0.32843	446.065	0.2928		2223.17	0.01575	2223.17	0.01281		446.039	0.27613
2221.74	0.00774	2221.74	0.00517		2221.74	0.01005	2221.74	0.00494		2221.74	0.01185	2221.74	0.00837		2221.74	0.01742	2221.74	0.01907		2221.74	0.00725	2221.74	0.00556		443.205	0.25703	443.205	0.29485		2221.74	0.01246	2221.74	0.01004		443.182	0.29124
2220.31	0.00849	2220.31	0.00508		2220.31	0.00933	2220.31	0.00453		2220.31	0.01235	2220.31	0.00823		2220.31	0.01693	2220.31	0.01887		2220.31	0.00868	2220.31	0.0071		440.346	0.32054	440.346	0.24946		2220.31	0.0084	2220.31	0.00696		440.325	0.29903
2218.88	0.00966	2218.88	0.00554		2218.88	0.00845	2218.88	0.00467		2218.88	0.01209	2218.88	0.00786		2218.88	0.01591	2218.88	0.0178		2218.88	0.01075	2218.88	0.00875		437.487	0.39121	437.487	0.19263		2218.88	0.00469	2218.88	0.00444		437.467	0.27894
2217.45	0.01094	2217.45	0.00645		2217.45	0.0077	2217.45	0.00532		2217.45	0.01114	2217.45	0.00734		2217.45	0.01448	2217.45	0.01605		2217.45	0.01294	2217.45	0.01007		434.627	0.42294	434.627	0.19192		2217.45	0.0024	2217.45	0.00319		434.61	0.27014
2216.02	0.01202	2216.02	0.00756		2216.02	0.0074	2216.02	0.00624		2216.02	0.00981	2216.02	0.00678		2216.02	0.01289	2216.02	0.01396		2216.02	0.01464	2216.02	0.01066		431.768	0.48273	431.768	0.24458		2216.02	0.0022	2216.02	0.00354		431.753	0.26695
2214.59	0.01262	2214.59	0.00854		2214.59	0.00766	2214.59	0.0071		2214.59	0.0085	2214.59	0.00637		2214.59	0.01142	2214.59	0.0119		2214.59	0.01532	2214.59	0.01031		428.908	0.38421	428.908	0.28041		2214.59	0.00418	2214.59	0.00537		428.896	0.2376
2213.16	0.0126	2213.16	0.00913		2213.16	0.00838	2213.16	0.00755		2213.16	0.0076	2213.16	0.00622		2213.16	0.01033	2213.16	0.0102		2213.16	0.01475	2213.16	0.00909		426.049	0.31515	426.049	0.2744		2213.16	0.00776	2213.16	0.00815		426.039	0.21668
2211.73	0.01191	2211.73	0.00916		2211.73	0.00923	2211.73	0.00742		2211.73	0.00732	2211.73	0.00636		2211.73	0.00984	2211.73	0.00913		2211.73	0.01308	2211.73	0.00743		423.19	0.23642	423.19	0.22645		2211.73	0.01187	2211.73	0.01107		423.181	0.19077
2210.3	0.01069	2210.3	0.00861		2210.3	0.00995	2210.3	0.00676		2210.3	0.00772	2210.3	0.00671		2210.3	0.01004	2210.3	0.00888		2210.3	0.01083	2210.3	0.0059		420.33	0.11163	420.33	0.19339		2210.3	0.01533	2210.3	0.01328		420.324	0.17384
2208.87	0.00923	2208.87	0.00762		2208.87	0.01036	2208.87	0.00584		2208.87	0.00872	2208.87	0.00715		2208.87	0.01091	2208.87	0.0095		2208.87	0.00871	2208.87	0.00497		417.471	0.0906	417.471	0.18519		2208.87	0.0172	2208.87	0.01416		417.467	0.17942
2207.44	0.00789	2207.44	0.00644		2207.44	0.01038	2207.44	0.00501		2207.44	0.01003	2207.44	0.00756		2207.44	0.01225	2207.44	0.01088		2207.44	0.00733	2207.44	0.00486		414.612	0.1742	414.612	0.19182		2207.44	0.017	2207.44	0.01347		414.61	0.193
2206.01	0.00704	2206.01	0.00537		2206.01	0.01002	2206.01	0.00459		2206.01	0.01127	2206.01	0.00782		2206.01	0.01377	2206.01	0.01275		2206.01	0.00702	2206.01	0.00549		411.752	0.27874	411.752	0.20249		2206.01	0.01479	2206.01	0.01144		411.753	0.18112
2204.58	0.0069	2204.58	0.00473		2204.58	0.00932	2204.58	0.00473		2204.58	0.01207	2204.58	0.00792		2204.58	0.01521	2204.58	0.01479		2204.58	0.0078	2204.58	0.00665		408.893	0.34558	408.893	0.16864		2204.58	0.0112	2204.58	0.00866		408.895	0.14846
2203.15	0.00755	2203.15	0.00475		2203.15	0.00849	2203.15	0.00534		2203.15	0.01224	2203.15	0.00787		2203.15	0.01641	2203.15	0.01666		2203.15	0.00943	2203.15	0.00803		406.033	0.28731	406.033	0.12175		2203.15	0.00723	2203.15	0.00589		406.038	0.1256
2201.72	0.00883	2201.72	0.00546		2201.72	0.00782	2201.72	0.00617		2201.72	0.01177	2201.72	0.00773		2201.72	0.01727	2201.72	0.0181		2201.72	0.01148	2201.72	0.00922		403.174	0.14293	403.174	0.10495		2201.72	0.00401	2201.72	0.00388		403.181	0.102
2200.29	0.01043	2200.29	0.00667		2200.29	0.0076	2200.29	0.00693		2200.29	0.0108	2200.29	0.0075		2200.29	0.01772	2200.29	0.01893		2200.29	0.01344	2200.29	0.00989		400.315	0.05065	400.315	0.06127		2200.29	0.00243	2200.29	0.00315		400.324	0.06138
2198.86	0.01191	2198.86	0.00804		2198.86	0.0079	2198.86	0.00733		2198.86	0.00961	2198.86	0.00719		2198.86	0.0177	2198.86	0.01901		2198.86	0.01475	2198.86	0.00983		397.455	0	397.455	0		2198.86	0.00295	2198.86	0.0039		397.467	3e-05
2197.43	0.01288	2197.43	0.00921		2197.43	0.0086	2197.43	0.00724		2197.43	0.00854	2197.43	0.00689		2197.43	0.01722	2197.43	0.01835		2197.43	0.01503	2197.43	0.0091							2197.43	0.00536	2197.43	0.00589
2196	0.01309	2196	0.00987		2196	0.00945	2196	0.00672		2196	0.00789	2196	0.00667		2196	0.01631	2196	0.01705		2196	0.01421	2196	0.00795							2196	0.00903	2196	0.00855
2194.57	0.01253	2194.57	0.00985		2194.57	0.01018	2194.57	0.00595		2194.57	0.0078	2194.57	0.0066		2194.57	0.01503	2194.57	0.01531		2194.57	0.01251	2194.57	0.00678							2194.57	0.01287	2194.57	0.0111
2193.14	0.01133	2193.14	0.00914		2193.14	0.01055	2193.14	0.00518		2193.14	0.00825	2193.14	0.00666		2193.14	0.01355	2193.14	0.01343		2193.14	0.01043	2193.14	0.00595							2193.14	0.0158	2193.14	0.01284
2191.71	0.00975	2191.71	0.00791		2191.71	0.01043	2191.71	0.00466		2191.71	0.00908	2191.71	0.00681		2191.71	0.01211	2191.71	0.01171		2191.71	0.00857	2191.71	0.00568							2191.71	0.01699	2191.71	0.01328
2190.28	0.00815	2190.28	0.00649		2190.28	0.00988	2190.28	0.0046		2190.28	0.00999	2190.28	0.007		2190.28	0.01104	2190.28	0.0105		2190.28	0.00745	2190.28	0.00599							2190.28	0.01611	2190.28	0.01227
2188.85	0.00695	2188.85	0.00526		2188.85	0.00905	2188.85	0.00502		2188.85	0.01072	2188.85	0.00721		2188.85	0.01058	2188.85	0.00998		2188.85	0.00739	2188.85	0.00675							2188.85	0.0134	2188.85	0.01012
2187.42	0.00646	2187.42	0.00459		2187.42	0.00819	2187.42	0.00574		2187.42	0.01109	2187.42	0.00745		2187.42	0.01085	2187.42	0.01028		2187.42	0.00835	2187.42	0.00771							2187.42	0.00959	2187.42	0.00742
2185.99	0.00683	2185.99	0.00468		2185.99	0.00758	2185.99	0.00645		2185.99	0.011	2185.99	0.00765		2185.99	0.01175	2185.99	0.01134		2185.99	0.01003	2185.99	0.00856							2185.99	0.00579	2185.99	0.00495
2184.56	0.008	2184.56	0.0055		2184.56	0.00747	2184.56	0.0069		2184.56	0.0105	2184.56	0.00773		2184.56	0.0131	2184.56	0.01293		2184.56	0.01198	2184.56	0.00909							2184.56	0.00315	2184.56	0.00338
2183.13	0.00968	2183.13	0.00685		2183.13	0.0079	2183.13	0.00697		2183.13	0.00975	2183.13	0.00762		2183.13	0.01458	2183.13	0.0147		2183.13	0.01367	2183.13	0.00913							2183.13	0.00241	2183.13	0.00313
2181.7	0.01138	2181.7	0.00836		2181.7	0.0087	2181.7	0.00663		2181.7	0.00896	2181.7	0.00733		2181.7	0.01592	2181.7	0.01632		2181.7	0.01462	2181.7	0.00869							2181.7	0.00369	2181.7	0.00425
2180.27	0.01262	2180.27	0.00959		2180.27	0.00956	2180.27	0.00603		2180.27	0.00833	2180.27	0.00691		2180.27	0.0169	2180.27	0.01752		2180.27	0.01455	2180.27	0.00796							2180.27	0.00662	2180.27	0.00642
2178.85	0.01309	2178.85	0.0102		2178.85	0.01015	2178.85	0.00536		2178.85	0.00804	2178.85	0.00652		2178.85	0.01745	2178.85	0.01817		2178.85	0.01348	2178.85	0.00724							2178.85	0.01036	2178.85	0.00902
2177.42	0.01269	2177.42	0.01002		2177.42	0.01028	2177.42	0.00485		2177.42	0.00812	2177.42	0.00625		2177.42	0.0176	2177.42	0.01823		2177.42	0.01177	2177.42	0.00681							2177.42	0.01381	2177.42	0.01127
2175.99	0.01151	2175.99	0.00913		2175.99	0.00994	2175.99	0.00472		2175.99	0.0085	2175.99	0.00615		2175.99	0.01737	2175.99	0.01775		2175.99	0.01	2175.99	0.00678							2175.99	0.01597	2175.99	0.01253
2174.56	0.00985	2174.56	0.00774		2174.56	0.00927	2174.56	0.00501		2174.56	0.00901	2174.56	0.0062		2174.56	0.01679	2174.56	0.01682		2174.56	0.00871	2174.56	0.00711							2174.56	0.01622	2174.56	0.01247
2173.13	0.00812	2173.13	0.00621		2173.13	0.00843	2173.13	0.0056		2173.13	0.00948	2173.13	0.00642		2173.13	0.01588	2173.13	0.01559		2173.13	0.00824	2173.13	0.00768							2173.13	0.01458	2173.13	0.01115
2171.7	0.00674	2171.7	0.00498		2171.7	0.00768	2171.7	0.00622		2171.7	0.00979	2171.7	0.00676		2171.7	0.01474	2171.7	0.01424		2171.7	0.00869	2171.7	0.00831							2171.7	0.01159	2171.7	0.009
2170.27	0.00603	2170.27	0.00436		2170.27	0.00726	2170.27	0.00663		2170.27	0.00988	2170.27	0.00712		2170.27	0.01353	2170.27	0.01296		2170.27	0.01	2170.27	0.00886							2170.27	0.00814	2170.27	0.00667
2168.84	0.00616	2168.84	0.00452		2168.84	0.00736	2168.84	0.00675		2168.84	0.00972	2168.84	0.00736		2168.84	0.01241	2168.84	0.01194		2168.84	0.0119	2168.84	0.00922							2168.84	0.00518	2168.84	0.0048
2167.41	0.00709	2167.41	0.00539		2167.41	0.00799	2167.41	0.00662		2167.41	0.0094	2167.41	0.00742		2167.41	0.01161	2167.41	0.01137		2167.41	0.01392	2167.41	0.00938							2167.41	0.00356	2167.41	0.0039
2165.98	0.00862	2165.98	0.00674		2165.98	0.00893	2165.98	0.00631		2165.98	0.00907	2165.98	0.00732		2165.98	0.0113	2165.98	0.01138		2165.98	0.01554	2165.98	0.00936							2165.98	0.00374	2165.98	0.00422
2164.55	0.01037	2164.55	0.00821		2164.55	0.00979	2164.55	0.00592		2164.55	0.00882	2164.55	0.00708		2164.55	0.01157	2164.55	0.01197		2164.55	0.01635	2164.55	0.00927							2164.55	0.00565	2164.55	0.00569
2163.12	0.01189	2163.12	0.00943		2163.12	0.01029	2163.12	0.00558		2163.12	0.00869	2163.12	0.00675		2163.12	0.01238	2163.12	0.01301		2163.12	0.01618	2163.12	0.00922							2163.12	0.00878	2163.12	0.00794
2161.69	0.01279	2161.69	0.01008		2161.69	0.01028	2161.69	0.00547		2161.69	0.00864	2161.69	0.00638		2161.69	0.01357	2161.69	0.01428		2161.69	0.01522	2161.69	0.00934							2161.69	0.01229	2161.69	0.01038
2160.26	0.01284	2160.26	0.01001		2160.26	0.0098	2160.26	0.00563		2160.26	0.00861	2160.26	0.00607		2160.26	0.01489	2160.26	0.01551		2160.26	0.01395	2160.26	0.00969							2160.26	0.01526	2160.26	0.01232
2158.83	0.01205	2158.83	0.00921		2158.83	0.009	2158.83	0.00596		2158.83	0.00858	2158.83	0.0059		2158.83	0.01604	2158.83	0.01648		2158.83	0.01285	2158.83	0.01025							2158.83	0.01689	2158.83	0.01324
2157.4	0.01062	2157.4	0.00791		2157.4	0.00812	2157.4	0.00629		2157.4	0.00852	2157.4	0.00593		2157.4	0.01687	2157.4	0.01702		2157.4	0.01233	2157.4	0.01089							2157.4	0.01676	2157.4	0.01299
2155.97	0.00893	2155.97	0.00645		2155.97	0.00743	2155.97	0.00648		2155.97	0.00847	2155.97	0.00612		2155.97	0.01732	2155.97	0.01709		2155.97	0.01264	2155.97	0.01147							2155.97	0.01495	2155.97	0.01175
2154.54	0.00741	2154.54	0.00526		2154.54	0.00719	2154.54	0.00652		2154.54	0.00846	2154.54	0.00639		2154.54	0.01739	2154.54	0.01676		2154.54	0.01384	2154.54	0.01192							2154.54	0.01211	2154.54	0.00999
2153.11	0.00642	2153.11	0.00466		2153.11	0.00754	2153.11	0.00649		2153.11	0.00857	2153.11	0.00671		2153.11	0.01713	2153.11	0.01618		2153.11	0.01573	2153.11	0.01222							2153.11	0.00921	2153.11	0.00825
2151.68	0.00622	2151.68	0.0048		2151.68	0.00838	2151.68	0.00645		2151.68	0.00878	2151.68	0.00699		2151.68	0.0166	2151.68	0.01551		2151.68	0.0179	2151.68	0.01244							2151.68	0.00717	2151.68	0.00708
2150.25	0.00692	2150.25	0.00566		2150.25	0.00944	2150.25	0.00642		2150.25	0.0091	2150.25	0.00718		2150.25	0.01591	2150.25	0.01487		2150.25	0.01995	2150.25	0.01272							2150.25	0.00658	2150.25	0.00689
2148.82	0.00838	2148.82	0.00702		2148.82	0.01036	2148.82	0.00646		2148.82	0.00949	2148.82	0.00724		2148.82	0.01514	2148.82	0.01432		2148.82	0.02154	2148.82	0.01319							2148.82	0.00764	2148.82	0.00785
2147.39	0.01025	2147.39	0.00853		2147.39	0.01089	2147.39	0.00663		2147.39	0.00986	2147.39	0.00721		2147.39	0.01443	2147.39	0.01391		2147.39	0.02243	2147.39	0.01393							2147.39	0.01013	2147.39	0.00984
2145.96	0.01204	2145.96	0.00982		2145.96	0.01087	2145.96	0.00693		2145.96	0.01007	2145.96	0.00709		2145.96	0.01387	2145.96	0.01367		2145.96	0.02255	2145.96	0.01486							2145.96	0.01352	2145.96	0.01241
2144.53	0.01329	2144.53	0.01056		2144.53	0.01033	2144.53	0.00723		2144.53	0.00999	2144.53	0.00687		2144.53	0.01354	2144.53	0.01368		2144.53	0.02207	2144.53	0.01585							2144.53	0.01696	2144.53	0.01487
2143.1	0.01372	2143.1	0.01059		2143.1	0.00945	2143.1	0.00737		2143.1	0.00965	2143.1	0.00659		2143.1	0.01348	2143.1	0.01398		2143.1	0.02141	2143.1	0.0168							2143.1	0.01962	2143.1	0.01663
2141.67	0.0133	2141.67	0.00991		2141.67	0.00854	2141.67	0.00732		2141.67	0.00915	2141.67	0.00638		2141.67	0.01373	2141.67	0.01452		2141.67	0.02105	2141.67	0.01762							2141.67	0.02088	2141.67	0.01738
2140.24	0.01218	2140.24	0.00875		2140.24	0.00798	2140.24	0.00718		2140.24	0.0087	2140.24	0.00636		2140.24	0.0143	2140.24	0.01521		2140.24	0.02134	2140.24	0.01826							2140.24	0.02057	2140.24	0.01711
2138.81	0.01068	2138.81	0.00744		2138.81	0.00801	2138.81	0.00707		2138.81	0.00851	2138.81	0.00657		2138.81	0.01515	2138.81	0.01587		2138.81	0.0224	2138.81	0.01867							2138.81	0.01904	2138.81	0.01617
2137.38	0.00919	2137.38	0.00637		2137.38	0.00862	2137.38	0.0071		2137.38	0.00869	2137.38	0.00697		2137.38	0.01616	2137.38	0.01636		2137.38	0.0241	2137.38	0.01886							2137.38	0.01702	2137.38	0.01503
2135.95	0.00812	2135.95	0.00584		2135.95	0.00959	2135.95	0.00726		2135.95	0.00918	2135.95	0.0074		2135.95	0.01718	2135.95	0.01662		2135.95	0.02617	2135.95	0.01895							2135.95	0.01533	2135.95	0.01418
2134.52	0.00775	2134.52	0.00599		2134.52	0.0106	2134.52	0.00752		2134.52	0.00983	2134.52	0.00775		2134.52	0.01806	2134.52	0.01666		2134.52	0.02829	2134.52	0.01917							2134.52	0.01459	2134.52	0.014
2133.1	0.00818	2133.1	0.00673		2133.1	0.01141	2133.1	0.00787		2133.1	0.01054	2133.1	0.00797		2133.1	0.01861	2133.1	0.01655		2133.1	0.03011	2133.1	0.01972							2133.1	0.01509	2133.1	0.01468
2131.67	0.00931	2131.67	0.00789		2131.67	0.01185	2131.67	0.00828		2131.67	0.01126	2131.67	0.00812		2131.67	0.01876	2131.67	0.01636		2131.67	0.03134	2131.67	0.02066							2131.67	0.01689	2131.67	0.01626
2130.24	0.0109	2130.24	0.00917		2130.24	0.01181	2130.24	0.00866		2130.24	0.01182	2130.24	0.00822		2130.24	0.01855	2130.24	0.01617		2130.24	0.03178	2130.24	0.02189							2130.24	0.0198	2130.24	0.01856
2128.81	0.01258	2128.81	0.01028		2128.81	0.0113	2128.81	0.00883		2128.81	0.01202	2128.81	0.00821		2128.81	0.01813	2128.81	0.01606		2128.81	0.03149	2128.81	0.02312							2128.81	0.02322	2128.81	0.02114
2127.38	0.01396	2127.38	0.01093		2127.38	0.01053	2127.38	0.0087		2127.38	0.01171	2127.38	0.00807		2127.38	0.01769	2127.38	0.01609		2127.38	0.03077	2127.38	0.02411							2127.38	0.02633	2127.38	0.02339
2125.95	0.01468	2125.95	0.01097		2125.95	0.00984	2125.95	0.00835		2125.95	0.011	2125.95	0.00783		2125.95	0.01734	2125.95	0.01627		2125.95	0.03011	2125.95	0.02473							2125.95	0.02835	2125.95	0.02481
2124.52	0.01457	2124.52	0.0104		2124.52	0.0095	2124.52	0.00794		2124.52	0.01011	2124.52	0.00757		2124.52	0.01714	2124.52	0.01658		2124.52	0.0299	2124.52	0.02498							2124.52	0.02894	2124.52	0.02524
2123.09	0.0137	2123.09	0.00938		2123.09	0.00963	2123.09	0.00769		2123.09	0.00936	2123.09	0.00737		2123.09	0.01706	2123.09	0.01694		2123.09	0.0303	2123.09	0.0249							2123.09	0.02823	2123.09	0.02484
2121.66	0.01236	2121.66	0.00824		2121.66	0.01019	2121.66	0.00775		2121.66	0.00904	2121.66	0.00733		2121.66	0.01702	2121.66	0.01728		2121.66	0.03123	2121.66	0.02455							2121.66	0.02671	2121.66	0.02401
2120.23	0.01095	2120.23	0.00732		2120.23	0.01103	2120.23	0.00813		2120.23	0.00931	2120.23	0.00754		2120.23	0.01699	2120.23	0.0175		2120.23	0.03248	2120.23	0.02407							2120.23	0.025	2120.23	0.02306
2118.8	0.00985	2118.8	0.00686		2118.8	0.0119	2118.8	0.00873		2118.8	0.01017	2118.8	0.008		2118.8	0.01698	2118.8	0.01756		2118.8	0.03373	2118.8	0.02369							2118.8	0.0236	2118.8	0.02224
2117.37	0.0093	2117.37	0.00696		2117.37	0.01255	2117.37	0.00937		2117.37	0.01137	2117.37	0.00858		2117.37	0.01708	2117.37	0.01743		2117.37	0.03471	2117.37	0.02361							2117.37	0.02281	2117.37	0.02174
2115.94	0.00936	2115.94	0.0075		2115.94	0.01278	2115.94	0.00987		2115.94	0.01257	2115.94	0.00909		2115.94	0.01737	2115.94	0.01714		2115.94	0.03511	2115.94	0.02387							2115.94	0.0228	2115.94	0.02175
2114.51	0.00997	2114.51	0.0083		2114.51	0.01251	2114.51	0.01001		2114.51	0.0134	2114.51	0.00938		2114.51	0.01787	2114.51	0.01674		2114.51	0.03472	2114.51	0.02433							2114.51	0.02363	2114.51	0.02231
2113.08	0.01096	2113.08	0.00917		2113.08	0.01174	2113.08	0.00965		2113.08	0.01361	2113.08	0.00937		2113.08	0.01845	2113.08	0.01632		2113.08	0.03351	2113.08	0.02468							2113.08	0.02506	2113.08	0.02319
2111.65	0.01211	2111.65	0.00992		2111.65	0.01067	2111.65	0.00886		2111.65	0.01309	2111.65	0.00902		2111.65	0.01893	2111.65	0.01593		2111.65	0.03168	2111.65	0.02468							2111.65	0.02653	2111.65	0.02398
2110.22	0.01315	2110.22	0.01033		2110.22	0.00963	2110.22	0.0079		2110.22	0.01194	2110.22	0.00842		2110.22	0.01915	2110.22	0.01562		2110.22	0.02958	2110.22	0.02415							2110.22	0.02732	2110.22	0.02425
2108.79	0.01376	2108.79	0.01026		2108.79	0.00898	2108.79	0.00711		2108.79	0.01044	2108.79	0.00766		2108.79	0.01908	2108.79	0.01549		2108.79	0.02762	2108.79	0.02308							2108.79	0.02701	2108.79	0.02378
2107.36	0.01371	2107.36	0.00965		2107.36	0.00889	2107.36	0.00673		2107.36	0.00895	2107.36	0.00687		2107.36	0.01878	2107.36	0.01561		2107.36	0.0261	2107.36	0.02159							2107.36	0.0256	2107.36	0.02259
2105.93	0.01295	2105.93	0.00866		2105.93	0.0093	2105.93	0.00682		2105.93	0.00784	2105.93	0.00626		2105.93	0.01833	2105.93	0.01598		2105.93	0.02518	2105.93	0.01988							2105.93	0.02347	2105.93	0.02092
2104.5	0.0117	2104.5	0.00755		2104.5	0.00995	2104.5	0.00729		2104.5	0.0074	2104.5	0.00601		2104.5	0.0179	2104.5	0.01658		2104.5	0.02479	2104.5	0.01821							2104.5	0.02102	2104.5	0.01904
2103.07	0.01028	2103.07	0.00663		2103.07	0.01059	2103.07	0.00796		2103.07	0.00777	2103.07	0.00621		2103.07	0.01759	2103.07	0.01731		2103.07	0.02468	2103.07	0.01684							2103.07	0.0186	2103.07	0.0172
2101.64	0.00903	2101.64	0.0061		2101.64	0.01103	2101.64	0.0086		2101.64	0.00884	2101.64	0.00677		2101.64	0.01745	2101.64	0.01798		2101.64	0.02457	2101.64	0.01596							2101.64	0.01648	2101.64	0.01558
2100.21	0.00815	2100.21	0.00604		2100.21	0.01111	2100.21	0.00895		2100.21	0.01027	2100.21	0.00745		2100.21	0.01737	2100.21	0.01839		2100.21	0.02419	2100.21	0.01564							2100.21	0.01496	2100.21	0.01439
2098.78	0.00776	2098.78	0.00635		2098.78	0.01074	2098.78	0.00881		2098.78	0.01157	2098.78	0.00802		2098.78	0.01718	2098.78	0.0184		2098.78	0.02337	2098.78	0.01572							2098.78	0.01424	2098.78	0.01378
2097.35	0.00787	2097.35	0.0069		2097.35	0.00996	2097.35	0.00816		2097.35	0.01232	2097.35	0.00831		2097.35	0.01682	2097.35	0.01798		2097.35	0.02201	2097.35	0.01585							2097.35	0.01433	2097.35	0.0137
2095.92	0.00846	2095.92	0.00754		2095.92	0.00895	2095.92	0.00716		2095.92	0.01219	2095.92	0.00824		2095.92	0.01635	2095.92	0.0172		2095.92	0.02019	2095.92	0.01571							2095.92	0.01498	2095.92	0.01393
2094.49	0.00939	2094.49	0.00811		2094.49	0.00804	2094.49	0.00611		2094.49	0.01118	2094.49	0.00776		2094.49	0.01596	2094.49	0.01621		2094.49	0.01818	2094.49	0.01512							2094.49	0.01575	2094.49	0.01414
2093.06	0.01041	2093.06	0.00845		2093.06	0.00754	2093.06	0.00543		2093.06	0.00956	2093.06	0.00696		2093.06	0.01577	2093.06	0.01517		2093.06	0.0163	2093.06	0.01405							2093.06	0.01615	2093.06	0.01403
2091.63	0.01121	2091.63	0.00844		2091.63	0.00764	2091.63	0.00535		2091.63	0.0078	2091.63	0.00602		2091.63	0.01585	2091.63	0.0142		2091.63	0.01486	2091.63	0.01264							2091.63	0.01587	2091.63	0.0135
2090.2	0.01151	2090.2	0.00803		2090.2	0.00821	2090.2	0.00584		2090.2	0.00636	2090.2	0.00518		2090.2	0.01615	2090.2	0.0134		2090.2	0.01405	2090.2	0.01112							2090.2	0.01488	2090.2	0.01261
2088.77	0.01122	2088.77	0.00734		2088.77	0.0089	2088.77	0.00663		2088.77	0.00556	2088.77	0.00466		2088.77	0.01653	2088.77	0.01291		2088.77	0.01388	2088.77	0.0098							2088.77	0.01338	2088.77	0.0115
2087.35	0.01045	2087.35	0.00661		2087.35	0.00957	2087.35	0.00754		2087.35	0.00572	2087.35	0.00472		2087.35	0.01693	2087.35	0.01291		2087.35	0.01423	2087.35	0.00896							2087.35	0.01183	2087.35	0.01046
2085.92	0.00939	2085.92	0.00601		2085.92	0.01002	2085.92	0.00822		2085.92	0.0068	2085.92	0.00534		2085.92	0.01723	2085.92	0.01347		2085.92	0.01474	2085.92	0.00871							2085.92	0.01044	2085.92	0.00955
2084.49	0.00832	2084.49	0.00569		2084.49	0.01017	2084.49	0.00846		2084.49	0.00849	2084.49	0.0063		2084.49	0.0174	2084.49	0.01454		2084.49	0.01507	2084.49	0.00896							2084.49	0.0094	2084.49	0.00886
2083.06	0.00747	2083.06	0.00569		2083.06	0.00999	2083.06	0.00817		2083.06	0.01027	2083.06	0.00731		2083.06	0.01747	2083.06	0.01594		2083.06	0.01494	2083.06	0.00952							2083.06	0.00886	2083.06	0.0085
2081.63	0.00702	2081.63	0.006		2081.63	0.00944	2081.63	0.00741		2081.63	0.01156	2081.63	0.00801		2081.63	0.01754	2081.63	0.01744		2081.63	0.01426	2081.63	0.01005							2081.63	0.00893	2081.63	0.0085
2080.2	0.007	2080.2	0.00649		2080.2	0.00863	2080.2	0.00641		2080.2	0.01192	2080.2	0.00815		2080.2	0.01768	2080.2	0.01876		2080.2	0.01309	2080.2	0.01028							2080.2	0.00946	2080.2	0.00876
2078.77	0.00741	2078.77	0.00701		2078.77	0.00786	2078.77	0.00553		2078.77	0.01124	2078.77	0.0077		2078.77	0.01786	2078.77	0.01964		2078.77	0.01169	2078.77	0.01008							2078.77	0.01016	2078.77	0.00907
2077.34	0.00811	2077.34	0.00735		2077.34	0.00741	2077.34	0.00504		2077.34	0.00971	2077.34	0.0068		2077.34	0.01792	2077.34	0.01987		2077.34	0.01037	2077.34	0.00948							2077.34	0.01065	2077.34	0.00921
2075.91	0.00892	2075.91	0.00743		2075.91	0.00741	2075.91	0.00512		2075.91	0.00777	2075.91	0.00571		2075.91	0.01775	2075.91	0.01943		2075.91	0.00941	2075.91	0.00858							2075.91	0.01075	2075.91	0.00912
2074.48	0.00966	2074.48	0.0073		2074.48	0.00774	2074.48	0.0057		2074.48	0.00595	2074.48	0.00472		2074.48	0.01729	2074.48	0.01838		2074.48	0.00901	2074.48	0.00757							2074.48	0.01052	2074.48	0.00887
2073.05	0.01015	2073.05	0.00702		2073.05	0.00825	2073.05	0.00655		2073.05	0.00476	2073.05	0.00412		2073.05	0.01661	2073.05	0.01688		2073.05	0.00925	2073.05	0.00671							2073.05	0.01012	2073.05	0.00858
2071.62	0.01024	2071.62	0.00669		2071.62	0.00877	2071.62	0.0074		2071.62	0.00455	2071.62	0.00405		2071.62	0.01592	2071.62	0.01515		2071.62	0.01001	2071.62	0.00624							2071.62	0.00966	2071.62	0.00832
2070.19	0.00991	2070.19	0.00636		2070.19	0.00918	2070.19	0.00792		2070.19	0.00537	2070.19	0.00455		2070.19	0.01538	2070.19	0.01343		2070.19	0.01097	2070.19	0.00631							2070.19	0.00918	2070.19	0.0081
2068.76	0.00928	2068.76	0.00609		2068.76	0.0093	2068.76	0.00793		2068.76	0.00697	2068.76	0.00546		2068.76	0.01515	2068.76	0.01195		2068.76	0.01177	2068.76	0.00682							2068.76	0.00864	2068.76	0.00786
2067.33	0.00854	2067.33	0.00598		2067.33	0.00905	2067.33	0.00743		2067.33	0.00887	2067.33	0.00647		2067.33	0.01535	2067.33	0.01104		2067.33	0.01215	2067.33	0.00752							2067.33	0.0081	2067.33	0.00759
2065.9	0.00787	2065.9	0.00607		2065.9	0.00852	2065.9	0.00657		2065.9	0.01051	2065.9	0.00729		2065.9	0.01593	2065.9	0.01098		2065.9	0.01195	2065.9	0.00809							2065.9	0.0077	2065.9	0.00734
2064.47	0.00734	2064.47	0.00628		2064.47	0.00785	2064.47	0.00564		2064.47	0.01136	2064.47	0.00763		2064.47	0.01665	2064.47	0.01186		2064.47	0.01115	2064.47	0.00834							2064.47	0.0076	2064.47	0.00722
2063.04	0.00702	2063.04	0.00653		2063.04	0.00724	2063.04	0.0049		2063.04	0.01114	2063.04	0.00737		2063.04	0.01733	2063.04	0.01355		2063.04	0.00991	2063.04	0.00816							2063.04	0.00777	2063.04	0.00723
2061.61	0.00705	2061.61	0.00675		2061.61	0.00678	2061.61	0.00455		2061.61	0.0099	2061.61	0.00656		2061.61	0.01796	2061.61	0.01576		2061.61	0.00863	2061.61	0.00758							2061.61	0.00809	2061.61	0.00724
2060.18	0.00745	2060.18	0.00688		2060.18	0.0066	2060.18	0.00468		2060.18	0.00804	2060.18	0.00547		2060.18	0.01857	2060.18	0.0181		2060.18	0.00767	2060.18	0.00676							2060.18	0.0084	2060.18	0.00725
2058.75	0.00813	2058.75	0.0069		2058.75	0.00673	2058.75	0.00521		2058.75	0.00614	2058.75	0.00446		2058.75	0.01905	2058.75	0.0201		2058.75	0.00727	2058.75	0.00594							2058.75	0.00868	2058.75	0.00731
2057.32	0.00889	2057.32	0.00683		2057.32	0.00712	2057.32	0.00597		2057.32	0.00478	2057.32	0.00385		2057.32	0.01933	2057.32	0.02143		2057.32	0.00753	2057.32	0.00537							2057.32	0.00892	2057.32	0.00748
2055.89	0.00954	2055.89	0.00674		2055.89	0.00766	2055.89	0.00671		2055.89	0.00436	2055.89	0.0038		2055.89	0.01937	2055.89	0.02188		2055.89	0.00839	2055.89	0.00526							2055.89	0.00915	2055.89	0.00775
2054.46	0.00994	2054.46	0.00671		2054.46	0.00821	2054.46	0.0072		2054.46	0.00496	2054.46	0.00427		2054.46	0.01912	2054.46	0.02143		2054.46	0.00956	2054.46	0.00566							2054.46	0.00933	2054.46	0.00806
2053.03	0.01	2053.03	0.00672		2053.03	0.0086	2053.03	0.00729		2053.03	0.0064	2053.03	0.00512		2053.03	0.01859	2053.03	0.0202		2053.03	0.0106	2053.03	0.00644							2053.03	0.00935	2053.03	0.00831
2051.6	0.00969	2051.6	0.00675		2051.6	0.00871	2051.6	0.00696		2051.6	0.00826	2051.6	0.00609		2051.6	0.01785	2051.6	0.01835		2051.6	0.01115	2051.6	0.00729							2051.6	0.00911	2051.6	0.00836
2050.17	0.00907	2050.17	0.00677		2050.17	0.00851	2050.17	0.00632		2050.17	0.01	2050.17	0.00693		2050.17	0.01702	2050.17	0.01609		2050.17	0.01107	2050.17	0.0079							2050.17	0.00859	2050.17	0.00811
2048.74	0.00833	2048.74	0.0068		2048.74	0.00813	2048.74	0.00564		2048.74	0.01115	2048.74	0.00738		2048.74	0.01625	2048.74	0.01371		2048.74	0.01041	2048.74	0.00807							2048.74	0.00788	2048.74	0.00757
2047.31	0.00768	2047.31	0.00682		2047.31	0.0077	2047.31	0.00515		2047.31	0.01138	2047.31	0.00729		2047.31	0.01567	2047.31	0.0116		2047.31	0.00935	2047.31	0.00777							2047.31	0.00713	2047.31	0.0069
2045.88	0.00724	2045.88	0.00681		2045.88	0.00735	2045.88	0.00503		2045.88	0.01061	2045.88	0.00669		2045.88	0.0154	2045.88	0.01017		2045.88	0.00815	2045.88	0.00711							2045.88	0.00659	2045.88	0.0063
2044.45	0.00708	2044.45	0.00669		2044.45	0.00715	2044.45	0.00526		2044.45	0.00906	2044.45	0.00579		2044.45	0.01554	2044.45	0.00978		2044.45	0.00716	2044.45	0.00626							2044.45	0.00648	2044.45	0.00594
2043.02	0.00724	2043.02	0.00649		2043.02	0.00714	2043.02	0.00572		2043.02	0.00723	2043.02	0.00491		2043.02	0.01615	2043.02	0.01064		2043.02	0.00672	2043.02	0.00548							2043.02	0.00688	2043.02	0.00596
2041.6	0.00774	2041.6	0.00633		2041.6	0.00737	2041.6	0.00628		2041.6	0.00569	2041.6	0.00433		2041.6	0.01717	2041.6	0.01274		2041.6	0.00704	2041.6	0.00511							2041.6	0.00771	2041.6	0.00645
2040.17	0.00848	2040.17	0.00634		2040.17	0.00779	2040.17	0.0068		2040.17	0.00494	2040.17	0.00424		2040.17	0.01841	2040.17	0.01569		2040.17	0.00806	2040.17	0.00536							2040.17	0.00875	2040.17	0.00732
2038.74	0.00929	2038.74	0.00654		2038.74	0.0083	2038.74	0.00714		2038.74	0.00513	2038.74	0.00459		2038.74	0.01965	2038.74	0.01889		2038.74	0.00939	2038.74	0.00613							2038.74	0.00967	2038.74	0.00828
2037.31	0.00992	2037.31	0.00687		2037.31	0.00874	2037.31	0.0072		2037.31	0.00617	2037.31	0.00523		2037.31	0.02069	2037.31	0.0217		2037.31	0.01054	2037.31	0.00709							2037.31	0.01019	2037.31	0.00899
2035.88	0.01021	2035.88	0.00719		2035.88	0.00901	2035.88	0.00698		2035.88	0.00773	2035.88	0.00595		2035.88	0.02128	2035.88	0.02359		2035.88	0.01116	2035.88	0.00787							2035.88	0.01026	2035.88	0.00931
2034.45	0.01007	2034.45	0.00741		2034.45	0.009	2034.45	0.00661		2034.45	0.00939	2034.45	0.00655		2034.45	0.02132	2034.45	0.02429		2034.45	0.01111	2034.45	0.00824							2034.45	0.00986	2034.45	0.00917
2033.02	0.00957	2033.02	0.00747		2033.02	0.00876	2033.02	0.00626		2033.02	0.01068	2033.02	0.00687		2033.02	0.02091	2033.02	0.02381		2033.02	0.01047	2033.02	0.00811							2033.02	0.00901	2033.02	0.00852
2031.59	0.00887	2031.59	0.00743		2031.59	0.00838	2031.59	0.00607		2031.59	0.01123	2031.59	0.00682		2031.59	0.0202	2031.59	0.02229		2031.59	0.00948	2031.59	0.00759							2031.59	0.00786	2031.59	0.00744
2030.16	0.00817	2030.16	0.00731		2030.16	0.00794	2030.16	0.00604		2030.16	0.01087	2030.16	0.00644		2030.16	0.01928	2030.16	0.01999		2030.16	0.00838	2030.16	0.00682							2030.16	0.00671	2030.16	0.00621
2028.73	0.00762	2028.73	0.00711		2028.73	0.00753	2028.73	0.00613		2028.73	0.00971	2028.73	0.00588		2028.73	0.01826	2028.73	0.01721		2028.73	0.00745	2028.73	0.00602							2028.73	0.00598	2028.73	0.00529
2027.3	0.00729	2027.3	0.00678		2027.3	0.00722	2027.3	0.00626		2027.3	0.00818	2027.3	0.00537		2027.3	0.01729	2027.3	0.01437		2027.3	0.00697	2027.3	0.00542							2027.3	0.00603	2027.3	0.00508
2025.87	0.00724	2025.87	0.0064		2025.87	0.00715	2025.87	0.00643		2025.87	0.00677	2025.87	0.0051		2025.87	0.01654	2025.87	0.01192		2025.87	0.00717	2025.87	0.00526							2025.87	0.00683	2025.87	0.00566
2024.44	0.00749	2024.44	0.00607		2024.44	0.0074	2024.44	0.00662		2024.44	0.00587	2024.44	0.00509		2024.44	0.0161	2024.44	0.01025		2024.44	0.00804	2024.44	0.00569							2024.44	0.00812	2024.44	0.00678
2023.01	0.00798	2023.01	0.00597		2023.01	0.0079	2023.01	0.00678		2023.01	0.00563	2023.01	0.00525		2023.01	0.01601	2023.01	0.00967		2023.01	0.00936	2023.01	0.00662							2023.01	0.00952	2023.01	0.00807
2021.58	0.00858	2021.58	0.00611		2021.58	0.00842	2021.58	0.0068		2021.58	0.006	2021.58	0.00543		2021.58	0.01627	2021.58	0.01029		2021.58	0.01069	2021.58	0.00768							2021.58	0.01061	2021.58	0.00917
2020.15	0.00907	2020.15	0.00641		2020.15	0.00873	2020.15	0.00665		2020.15	0.00683	2020.15	0.00557		2020.15	0.01695	2020.15	0.01214		2020.15	0.01157	2020.15	0.00841							2020.15	0.01106	2020.15	0.00975
2018.72	0.00934	2018.72	0.00678		2018.72	0.00874	2018.72	0.00647		2018.72	0.008	2018.72	0.00573		2018.72	0.01817	2018.72	0.0151		2018.72	0.01176	2018.72	0.00858							2018.72	0.0107	2018.72	0.00962
2017.29	0.00931	2017.29	0.00711		2017.29	0.00857	2017.29	0.00639		2017.29	0.00928	2017.29	0.00593		2017.29	0.01974	2017.29	0.01871		2017.29	0.01131	2017.29	0.00826							2017.29	0.00955	2017.29	0.00878
2015.86	0.00899	2015.86	0.00728		2015.86	0.00829	2015.86	0.00643		2015.86	0.01026	2015.86	0.0061		2015.86	0.02122	2015.86	0.02217		2015.86	0.01049	2015.86	0.00769							2015.86	0.00789	2015.86	0.00742
2014.43	0.00844	2014.43	0.00727		2014.43	0.00789	2014.43	0.00644		2014.43	0.01056	2014.43	0.00613		2014.43	0.0223	2014.43	0.02469		2014.43	0.00956	2014.43	0.00703							2014.43	0.00611	2014.43	0.00582
2013	0.00778	2013	0.00703		2013	0.00737	2013	0.00634		2013	0.01006	2013	0.00603		2013	0.02279	2013	0.02582		2013	0.00875	2013	0.0064							2013	0.00471	2013	0.00442
2011.57	0.00716	2011.57	0.00661		2011.57	0.00691	2011.57	0.00618		2011.57	0.009	2011.57	0.00589		2011.57	0.02256	2011.57	0.02544		2011.57	0.00833	2011.57	0.00605							2011.57	0.00418	2011.57	0.00372
2010.14	0.00674	2010.14	0.0061		2010.14	0.00677	2010.14	0.00611		2010.14	0.00775	2010.14	0.00582		2010.14	0.02162	2010.14	0.02366		2010.14	0.00862	2010.14	0.0063							2010.14	0.00481	2010.14	0.00405
2008.71	0.00667	2008.71	0.00567		2008.71	0.00711	2008.71	0.00621		2008.71	0.00676	2008.71	0.00587		2008.71	0.02024	2008.71	0.02089		2008.71	0.00977	2008.71	0.00729							2008.71	0.00644	2008.71	0.00531
2007.28	0.007	2007.28	0.0055		2007.28	0.00784	2007.28	0.00646		2007.28	0.00627	2007.28	0.00597		2007.28	0.01877	2007.28	0.01767		2007.28	0.01154	2007.28	0.00879							2007.28	0.00854	2007.28	0.00711
2005.85	0.00763	2005.85	0.00566		2005.85	0.00875	2005.85	0.00678		2005.85	0.00636	2005.85	0.00604		2005.85	0.01747	2005.85	0.01452		2005.85	0.01343	2005.85	0.01035							2005.85	0.01048	2005.85	0.00891
2004.42	0.00839	2004.42	0.00611		2004.42	0.00955	2004.42	0.00709		2004.42	0.00696	2004.42	0.00601		2004.42	0.0165	2004.42	0.01186		2004.42	0.01497	2004.42	0.01151							2004.42	0.01174	2004.42	0.01023
2002.99	0.00909	2002.99	0.0067		2002.99	0.01001	2002.99	0.00732		2002.99	0.0079	2002.99	0.00592		2002.99	0.01594	2002.99	0.01006		2002.99	0.01584	2002.99	0.012							2002.99	0.01201	2002.99	0.0107
2001.56	0.00955	2001.56	0.00724		2001.56	0.01001	2001.56	0.00741		2001.56	0.00891	2001.56	0.00585		2001.56	0.01589	2001.56	0.00944		2001.56	0.01597	2001.56	0.0118							2001.56	0.01117	2001.56	0.01013
2000.13	0.00963	2000.13	0.00759		2000.13	0.00953	2000.13	0.00728		2000.13	0.00973	2000.13	0.00584		2000.13	0.0164	2000.13	0.01019		2000.13	0.0155	2000.13	0.0111							2000.13	0.00934	2000.13	0.00857
1998.7	0.00929	1998.7	0.00764		1998.7	0.00874	1998.7	0.00695		1998.7	0.01014	1998.7	0.00595		1998.7	0.01744	1998.7	0.01225		1998.7	0.01467	1998.7	0.01023							1998.7	0.00697	1998.7	0.00643
1997.27	0.0086	1997.27	0.00738		1997.27	0.00785	1997.27	0.00649		1997.27	0.01003	1997.27	0.00617		1997.27	0.01875	1997.27	0.01525		1997.27	0.01379	1997.27	0.00952							1997.27	0.0048	1997.27	0.00438
1995.85	0.00768	1995.85	0.00681		1995.85	0.00702	1995.85	0.00598		1995.85	0.00942	1995.85	0.00642		1995.85	0.02009	1995.85	0.01858		1995.85	0.01312	1995.85	0.00916							1995.85	0.00355	1995.85	0.00306
1994.42	0.00674	1994.42	0.00602		1994.42	0.00642	1994.42	0.00553		1994.42	0.00839	1994.42	0.00654		1994.42	0.02133	1994.42	0.02169		1994.42	0.01292	1994.42	0.00928							1994.42	0.00361	1994.42	0.00283
1992.99	0.00602	1992.99	0.00521		1992.99	0.0063	1992.99	0.0053		1992.99	0.0072	1992.99	0.00643		1992.99	0.02228	1992.99	0.02405		1992.99	0.0134	1992.99	0.01003							1992.99	0.00506	1992.99	0.00386
1991.56	0.00575	1991.56	0.00469		1991.56	0.00683	1991.56	0.00548		1991.56	0.00627	1991.56	0.00615		1991.56	0.02263	1991.56	0.02518		1991.56	0.01455	1991.56	0.01136							1991.56	0.00759	1991.56	0.00599
1990.13	0.00607	1990.13	0.0047		1990.13	0.00785	1990.13	0.00605		1990.13	0.00594	1990.13	0.00584		1990.13	0.02234	1990.13	0.02489		1990.13	0.016	1990.13	0.01283							1990.13	0.01038	1990.13	0.00855
1988.7	0.00691	1988.7	0.00529		1988.7	0.00892	1988.7	0.00674		1988.7	0.00627	1988.7	0.0056		1988.7	0.02166	1988.7	0.02337		1988.7	0.01724	1988.7	0.01379							1988.7	0.01254	1988.7	0.01067
1987.27	0.00799	1987.27	0.00618		1987.27	0.00964	1987.27	0.00727		1987.27	0.00702	1987.27	0.00542		1987.27	0.02068	1987.27	0.02096		1987.27	0.01782	1987.27	0.01385							1987.27	0.01355	1987.27	0.01179
1985.84	0.00897	1985.84	0.00704		1985.84	0.00975	1985.84	0.00742		1985.84	0.0079	1985.84	0.00531		1985.84	0.01942	1985.84	0.01804		1985.84	0.01753	1985.84	0.01302							1985.84	0.01324	1985.84	0.01166
1984.41	0.0096	1984.41	0.00766		1984.41	0.0092	1984.41	0.00711		1984.41	0.00872	1984.41	0.00534		1984.41	0.0181	1984.41	0.01508		1984.41	0.01633	1984.41	0.01152							1984.41	0.01163	1984.41	0.01025
1982.98	0.00975	1982.98	0.00795		1982.98	0.00814	1982.98	0.00641		1982.98	0.00933	1982.98	0.0056		1982.98	0.017	1982.98	0.01257		1982.98	0.01447	1982.98	0.00971							1982.98	0.00908	1982.98	0.00792
1981.55	0.00944	1981.55	0.00792		1981.55	0.0069	1981.55	0.00556		1981.55	0.00963	1981.55	0.0061		1981.55	0.0163	1981.55	0.01084		1981.55	0.01241	1981.55	0.0081							1981.55	0.00639	1981.55	0.00543
1980.12	0.00881	1980.12	0.00763		1980.12	0.00589	1980.12	0.00482		1980.12	0.00958	1980.12	0.00676		1980.12	0.01616	1980.12	0.01018		1980.12	0.01067	1980.12	0.0071							1980.12	0.00452	1980.12	0.00363
1978.69	0.00806	1978.69	0.00717		1978.69	0.00545	1978.69	0.00447		1978.69	0.00919	1978.69	0.00739		1978.69	0.0167	1978.69	0.01079		1978.69	0.00965	1978.69	0.00696							1978.69	0.00417	1978.69	0.00315
1977.26	0.00738	1977.26	0.00664		1977.26	0.00575	1977.26	0.00464		1977.26	0.00857	1977.26	0.00775		1977.26	0.01789	1977.26	0.01265		1977.26	0.00953	1977.26	0.00762							1977.26	0.0055	1977.26	0.00414
1975.83	0.00695	1975.83	0.00619		1975.83	0.0067	1975.83	0.00526		1975.83	0.00789	1975.83	0.00769		1975.83	0.01955	1975.83	0.01552		1975.83	0.01021	1975.83	0.00874							1975.83	0.00801	1975.83	0.00623
1974.4	0.00689	1974.4	0.00592		1974.4	0.00797	1974.4	0.00612		1974.4	0.00732	1974.4	0.00721		1974.4	0.02142	1974.4	0.01892		1974.4	0.01135	1974.4	0.00986							1974.4	0.01081	1974.4	0.00876
1972.97	0.00722	1972.97	0.0059		1972.97	0.00911	1972.97	0.00692		1972.97	0.007	1972.97	0.00648		1972.97	0.02316	1972.97	0.0222		1972.97	0.01243	1972.97	0.01048							1972.97	0.01304	1972.97	0.01093
1971.54	0.00784	1971.54	0.00614		1971.54	0.00979	1971.54	0.00741		1971.54	0.00696	1971.54	0.00571		1971.54	0.02442	1971.54	0.02471		1971.54	0.01295	1971.54	0.01029							1971.54	0.01407	1971.54	0.01208
1970.11	0.00859	1970.11	0.00657		1970.11	0.00983	1970.11	0.00742		1970.11	0.00715	1970.11	0.00511		1970.11	0.02507	1970.11	0.02602		1970.11	0.01268	1970.11	0.00921							1970.11	0.01358	1970.11	0.01177
1968.68	0.00932	1968.68	0.00708		1968.68	0.00922	1968.68	0.0069		1968.68	0.00751	1968.68	0.00486		1968.68	0.02506	1968.68	0.02596		1968.68	0.01164	1968.68	0.00746							1968.68	0.01153	1968.68	0.0099
1967.25	0.00975	1967.25	0.00748		1967.25	0.00805	1967.25	0.00598		1967.25	0.00796	1967.25	0.00507		1967.25	0.02424	1967.25	0.02452		1967.25	0.01003	1967.25	0.00554							1967.25	0.00844	1967.25	0.00702
1965.82	0.00969	1965.82	0.0076		1965.82	0.00662	1965.82	0.0049		1965.82	0.0084	1965.82	0.0057		1965.82	0.02259	1965.82	0.02197		1965.82	0.00821	1965.82	0.00408							1965.82	0.00528	1965.82	0.0041
1964.39	0.00914	1964.39	0.00742		1964.39	0.00536	1964.39	0.00402		1964.39	0.00871	1964.39	0.00652		1964.39	0.02058	1964.39	0.01893		1964.39	0.00665	1964.39	0.00348							1964.39	0.00305	1964.39	0.00206
1962.96	0.0083	1962.96	0.00706		1962.96	0.00471	1962.96	0.00362		1962.96	0.00881	1962.96	0.00728		1962.96	0.01876	1962.96	0.01599		1962.96	0.00574	1962.96	0.00375							1962.96	0.00234	1962.96	0.00135
1961.53	0.00742	1961.53	0.00662		1961.53	0.0049	1961.53	0.00385		1961.53	0.00865	1961.53	0.00774		1961.53	0.01731	1961.53	0.01348		1961.53	0.00572	1961.53	0.00477							1961.53	0.00332	1961.53	0.0021
1960.1	0.00673	1960.1	0.00619		1960.1	0.00585	1960.1	0.0046		1960.1	0.00825	1960.1	0.00775		1960.1	0.01626	1960.1	0.01163		1960.1	0.00658	1960.1	0.00623							1960.1	0.00575	1960.1	0.00414
1958.67	0.00636	1958.67	0.00584		1958.67	0.00719	1958.67	0.00555		1958.67	0.00771	1958.67	0.00727		1958.67	0.01578	1958.67	0.01072		1958.67	0.00806	1958.67	0.00768							1958.67	0.00887	1958.67	0.00687
1957.24	0.00637	1957.24	0.00563		1957.24	0.00838	1957.24	0.00628		1957.24	0.00718	1957.24	0.00646		1957.24	0.01609	1957.24	0.01095		1957.24	0.00966	1957.24	0.00861							1957.24	0.01168	1957.24	0.00939
1955.81	0.00676	1955.81	0.00563		1955.81	0.00902	1955.81	0.00657		1955.81	0.00682	1955.81	0.00559		1955.81	0.01722	1955.81	0.01235		1955.81	0.01086	1955.81	0.00872							1955.81	0.01336	1955.81	0.01095
1954.38	0.00747	1954.38	0.00588		1954.38	0.00896	1954.38	0.00636		1954.38	0.00671	1954.38	0.00492		1954.38	0.01902	1954.38	0.01473		1954.38	0.01124	1954.38	0.00797							1954.38	0.01347	1954.38	0.0111
1952.95	0.00836	1952.95	0.00632		1952.95	0.00823	1952.95	0.00573		1952.95	0.00686	1952.95	0.00461		1952.95	0.02119	1952.95	0.01771		1952.95	0.01065	1952.95	0.00658							1952.95	0.01197	1952.95	0.0098
1951.52	0.00918	1951.52	0.0068		1951.52	0.00701	1951.52	0.0048		1951.52	0.00719	1951.52	0.00474		1951.52	0.02329	1951.52	0.02076		1951.52	0.00926	1951.52	0.00496							1951.52	0.00924	1951.52	0.00739
1950.1	0.00962	1950.1	0.00709		1950.1	0.00559	1950.1	0.00381		1950.1	0.00758	1950.1	0.00526		1950.1	0.02486	1950.1	0.02327		1950.1	0.00746	1950.1	0.00355							1950.1	0.00602	1950.1	0.00453
1948.67	0.00948	1948.67	0.00703		1948.67	0.00438	1948.67	0.00308		1948.67	0.00793	1948.67	0.00603		1948.67	0.02557	1948.67	0.02478		1948.67	0.00575	1948.67	0.00273							1948.67	0.00324	1948.67	0.002
1947.24	0.00875	1947.24	0.00664		1947.24	0.00379	1947.24	0.00289		1947.24	0.00814	1947.24	0.0068		1947.24	0.0253	1947.24	0.02506		1947.24	0.00452	1947.24	0.00268							1947.24	0.00175	1947.24	0.00053
1945.81	0.00765	1945.81	0.0061		1945.81	0.00409	1945.81	0.00332		1945.81	0.0082	1945.81	0.00734		1945.81	0.02428	1945.81	0.02418		1945.81	0.00402	1945.81	0.00336							1945.81	0.002	1945.81	0.00056
1944.38	0.00656	1944.38	0.00564		1944.38	0.00524	1944.38	0.00423		1944.38	0.00812	1944.38	0.0075		1944.38	0.02286	1944.38	0.0224		1944.38	0.00447	1944.38	0.00462							1944.38	0.00399	1944.38	0.00217
1942.95	0.00587	1942.95	0.0054		1942.95	0.00689	1942.95	0.00529		1942.95	0.00791	1942.95	0.00724		1942.95	0.02115	1942.95	0.01995		1942.95	0.00593	1942.95	0.00614							1942.95	0.00726	1942.95	0.00505
1941.52	0.00578	1941.52	0.0054		1941.52	0.00847	1941.52	0.00614		1941.52	0.00761	1941.52	0.00666		1941.52	0.01923	1941.52	0.01721		1941.52	0.008	1941.52	0.00749							1941.52	0.01082	1941.52	0.00837
1940.09	0.00627	1940.09	0.0056		1940.09	0.00946	1940.09	0.00649		1940.09	0.00731	1940.09	0.00598		1940.09	0.01754	1940.09	0.01478		1940.09	0.00989	1940.09	0.00813							1940.09	0.01341	1940.09	0.01088
1938.66	0.00715	1938.66	0.00594		1938.66	0.00956	1938.66	0.00625		1938.66	0.00708	1938.66	0.0054		1938.66	0.01654	1938.66	0.01313		1938.66	0.01089	1938.66	0.0078							1938.66	0.01419	1938.66	0.01167
1937.23	0.00814	1937.23	0.00631		1937.23	0.00878	1937.23	0.00552		1937.23	0.00696	1937.23	0.00504		1937.23	0.01627	1937.23	0.01229		1937.23	0.01072	1937.23	0.00663							1937.23	0.01305	1937.23	0.0106
1935.8	0.00903	1935.8	0.00663		1935.8	0.0074	1935.8	0.00457		1935.8	0.00702	1935.8	0.00504		1935.8	0.01661	1935.8	0.01219		1935.8	0.00955	1935.8	0.0051							1935.8	0.01048	1935.8	0.00816
1934.37	0.00968	1934.37	0.00688		1934.37	0.00591	1934.37	0.00377		1934.37	0.00736	1934.37	0.0055		1934.37	0.01763	1934.37	0.01291		1934.37	0.00784	1934.37	0.00382							1934.37	0.00728	1934.37	0.00519
1932.94	0.00997	1932.94	0.00703		1932.94	0.00483	1932.94	0.00341		1932.94	0.00796	1932.94	0.00635		1932.94	0.01941	1932.94	0.01453		1932.94	0.0062	1932.94	0.0032							1932.94	0.00445	1932.94	0.00263
1931.51	0.00981	1931.51	0.00705		1931.51	0.00459	1931.51	0.00358		1931.51	0.0087	1931.51	0.00734		1931.51	0.02175	1931.51	0.01692		1931.51	0.00513	1931.51	0.00345							1931.51	0.00286	1931.51	0.00128
1930.08	0.00921	1930.08	0.00692		1930.08	0.0053	1930.08	0.00418		1930.08	0.00934	1930.08	0.00813		1930.08	0.02422	1930.08	0.01974		1930.08	0.0049	1930.08	0.00442							1930.08	0.00304	1930.08	0.00145
1928.65	0.00831	1928.65	0.00664		1928.65	0.00666	1928.65	0.00497		1928.65	0.00968	1928.65	0.00851		1928.65	0.02619	1928.65	0.02242		1928.65	0.00549	1928.65	0.00571							1928.65	0.00488	1928.65	0.00312
1927.22	0.0073	1927.22	0.00625		1927.22	0.00814	1927.22	0.00567		1927.22	0.00956	1927.22	0.00835		1927.22	0.0272	1927.22	0.02442		1927.22	0.0066	1927.22	0.0069							1927.22	0.00765	1927.22	0.00563
1925.79	0.00647	1925.79	0.00586		1925.79	0.00919	1925.79	0.00599		1925.79	0.00902	1925.79	0.00771		1925.79	0.02717	1925.79	0.02539		1925.79	0.00783	1925.79	0.00756							1925.79	0.01031	1925.79	0.00808
1924.36	0.00608	1924.36	0.00557		1924.36	0.00946	1924.36	0.00587		1924.36	0.00818	1924.36	0.00675		1924.36	0.02621	1924.36	0.02523		1924.36	0.00883	1924.36	0.00747							1924.36	0.01214	1924.36	0.00972
1922.93	0.00622	1922.93	0.0054		1922.93	0.00896	1922.93	0.00537		1922.93	0.00729	1922.93	0.00574		1922.93	0.02445	1922.93	0.02397		1922.93	0.00936	1922.93	0.00669							1922.93	0.01276	1922.93	0.01019
1921.5	0.00679	1921.5	0.00535		1921.5	0.00785	1921.5	0.00465		1921.5	0.00658	1921.5	0.00495		1921.5	0.02229	1921.5	0.02194		1921.5	0.00928	1921.5	0.0055							1921.5	0.01201	1921.5	0.00937
1920.07	0.00761	1920.07	0.00544		1920.07	0.00639	1920.07	0.00392		1920.07	0.00621	1920.07	0.00461		1920.07	0.02044	1920.07	0.0197		1920.07	0.00853	1920.07	0.00419							1920.07	0.00986	1920.07	0.00729
1918.64	0.00849	1918.64	0.00565		1918.64	0.00494	1918.64	0.00337		1918.64	0.00632	1918.64	0.00482		1918.64	0.01909	1918.64	0.01754		1918.64	0.0072	1918.64	0.00311							1918.64	0.00681	1918.64	0.00445
1917.21	0.0092	1917.21	0.00596		1917.21	0.00406	1917.21	0.00323		1917.21	0.00692	1917.21	0.00554		1917.21	0.01795	1917.21	0.0155		1917.21	0.00567	1917.21	0.00268							1917.21	0.00397	1917.21	0.0019
1915.78	0.00953	1915.78	0.00626		1915.78	0.00411	1915.78	0.00351		1915.78	0.00785	1915.78	0.00654		1915.78	0.01702	1915.78	0.01379		1915.78	0.00447	1915.78	0.00301							1915.78	0.00242	1915.78	0.00061
1914.35	0.00938	1914.35	0.00644		1914.35	0.00501	1914.35	0.004		1914.35	0.0088	1914.35	0.00749		1914.35	0.01672	1914.35	0.01274		1914.35	0.00393	1914.35	0.00383							1914.35	0.00247	1914.35	0.00079
1912.92	0.00869	1912.92	0.0064		1912.92	0.00638	1912.92	0.00445		1912.92	0.00939	1912.92	0.00803		1912.92	0.01721	1912.92	0.01251		1912.92	0.00408	1912.92	0.00473							1912.92	0.00385	1912.92	0.00215
1911.49	0.00764	1911.49	0.00616		1911.49	0.00783	1911.49	0.00475		1911.49	0.00943	1911.49	0.00802		1911.49	0.01848	1911.49	0.01319		1911.49	0.00488	1911.49	0.00548							1911.49	0.00615	1911.49	0.0043
1910.06	0.00659	1910.06	0.00587		1910.06	0.00901	1910.06	0.00493		1910.06	0.00898	1910.06	0.00755		1910.06	0.02045	1910.06	0.01493		1910.06	0.00625	1910.06	0.00602							1910.06	0.00891	1910.06	0.00681
1908.63	0.00593	1908.63	0.0057		1908.63	0.00961	1908.63	0.00502		1908.63	0.00826	1908.63	0.00682		1908.63	0.02293	1908.63	0.01765		1908.63	0.00792	1908.63	0.00631							1908.63	0.01141	1908.63	0.00904
1907.2	0.00585	1907.2	0.00567		1907.2	0.00941	1907.2	0.005		1907.2	0.00746	1907.2	0.00604		1907.2	0.02544	1907.2	0.02087		1907.2	0.00932	1907.2	0.00619							1907.2	0.01276	1907.2	0.01018
1905.77	0.00633	1905.77	0.00576		1905.77	0.00842	1905.77	0.00482		1905.77	0.00671	1905.77	0.00537		1905.77	0.02746	1905.77	0.02389		1905.77	0.00993	1905.77	0.00559							1905.77	0.01242	1905.77	0.00975
1904.35	0.00717	1904.35	0.00591		1904.35	0.00696	1904.35	0.00453		1904.35	0.00618	1904.35	0.00496		1904.35	0.02854	1904.35	0.02612		1904.35	0.00953	1904.35	0.00465							1904.35	0.01052	1904.35	0.00794
1902.92	0.00816	1902.92	0.0061		1902.92	0.00553	1902.92	0.00422		1902.92	0.00607	1902.92	0.00494		1902.92	0.02848	1902.92	0.02716		1902.92	0.00828	1902.92	0.00372							1902.92	0.00779	1902.92	0.00546
1901.49	0.00904	1901.49	0.00629		1901.49	0.0046	1901.49	0.00399		1901.49	0.00648	1901.49	0.00537		1901.49	0.02739	1901.49	0.02694		1901.49	0.00663	1901.49	0.00314							1901.49	0.00515	1901.49	0.00317
1900.06	0.00959	1900.06	0.00644		1900.06	0.00443	1900.06	0.00385		1900.06	0.00732	1900.06	0.00613		1900.06	0.02565	1900.06	0.02563		1900.06	0.00509	1900.06	0.00307							1900.06	0.00336	1900.06	0.00175
1898.63	0.00969	1898.63	0.00651		1898.63	0.00502	1898.63	0.00381		1898.63	0.00833	1898.63	0.007		1898.63	0.02367	1898.63	0.02352		1898.63	0.00408	1898.63	0.00343							1898.63	0.00289	1898.63	0.00156
1897.2	0.0093	1897.2	0.0065		1897.2	0.0062	1897.2	0.00391		1897.2	0.00923	1897.2	0.00775		1897.2	0.02181	1897.2	0.02095		1897.2	0.00391	1897.2	0.00408							1897.2	0.00386	1897.2	0.00268
1895.77	0.00853	1895.77	0.00643		1895.77	0.00767	1895.77	0.00421		1895.77	0.00975	1895.77	0.00817		1895.77	0.02015	1895.77	0.01821		1895.77	0.00465	1895.77	0.00486							1895.77	0.00606	1895.77	0.00489
1894.34	0.0076	1894.34	0.00635		1894.34	0.00901	1894.34	0.00468		1894.34	0.00976	1894.34	0.00815		1894.34	0.01874	1894.34	0.0156		1894.34	0.00603	1894.34	0.00557							1894.34	0.00881	1894.34	0.00753
1892.91	0.00679	1892.91	0.00628		1892.91	0.00968	1892.91	0.00514		1892.91	0.00928	1892.91	0.00771		1892.91	0.01789	1892.91	0.01365		1892.91	0.00749	1892.91	0.00593							1892.91	0.0111	1892.91	0.00959
1891.48	0.00637	1891.48	0.00626		1891.48	0.00933	1891.48	0.0054		1891.48	0.00846	1891.48	0.007		1891.48	0.0181	1891.48	0.01291		1891.48	0.00849	1891.48	0.00574							1891.48	0.01208	1891.48	0.01024
1890.05	0.00641	1890.05	0.00626		1890.05	0.00808	1890.05	0.0054		1890.05	0.0075	1890.05	0.00619		1890.05	0.01936	1890.05	0.01352		1890.05	0.00883	1890.05	0.00511							1890.05	0.01155	1890.05	0.00938
1888.62	0.00683	1888.62	0.0062		1888.62	0.00649	1888.62	0.00523		1888.62	0.00669	1888.62	0.00555		1888.62	0.02125	1888.62	0.0153		1888.62	0.00854	1888.62	0.00439							1888.62	0.00992	1888.62	0.00758
1887.19	0.00751	1887.19	0.00615		1887.19	0.00519	1887.19	0.00494		1887.19	0.00633	1887.19	0.0053		1887.19	0.02351	1887.19	0.018		1887.19	0.00778	1887.19	0.00386							1887.19	0.0078	1887.19	0.00552
1885.76	0.00834	1885.76	0.0062		1885.76	0.00457	1885.76	0.00456		1885.76	0.00657	1885.76	0.00557		1885.76	0.02599	1885.76	0.02128		1885.76	0.00673	1885.76	0.00362							1885.76	0.00575	1885.76	0.00375
1884.33	0.00914	1884.33	0.00639		1884.33	0.00477	1884.33	0.00418		1884.33	0.00737	1884.33	0.00626		1884.33	0.02822	1884.33	0.02461		1884.33	0.00566	1884.33	0.00372							1884.33	0.00438	1884.33	0.00276
1882.9	0.00975	1882.9	0.00667		1882.9	0.00576	1882.9	0.00402		1882.9	0.00849	1882.9	0.00719		1882.9	0.02955	1882.9	0.0273		1882.9	0.00491	1882.9	0.00411							1882.9	0.00414	1882.9	0.0029
1881.47	0.01002	1881.47	0.00702		1881.47	0.00731	1881.47	0.00424		1881.47	0.00963	1881.47	0.00812		1881.47	0.02971	1881.47	0.02886		1881.47	0.00482	1881.47	0.00469							1881.47	0.00516	1881.47	0.00419
1880.04	0.00993	1880.04	0.00735		1880.04	0.009	1880.04	0.00484		1880.04	0.01048	1880.04	0.00881		1880.04	0.02886	1880.04	0.02908		1880.04	0.00548	1880.04	0.0053							1880.04	0.00712	1880.04	0.00625
1878.61	0.0095	1878.61	0.0076		1878.61	0.01033	1878.61	0.00569		1878.61	0.01085	1878.61	0.0091		1878.61	0.02736	1878.61	0.02805		1878.61	0.00677	1878.61	0.00581							1878.61	0.00947	1878.61	0.00851
1877.18	0.00887	1877.18	0.00771		1877.18	0.01091	1877.18	0.00653		1877.18	0.01066	1877.18	0.00893		1877.18	0.02562	1877.18	0.02603		1877.18	0.00832	1877.18	0.00616							1877.18	0.01158	1877.18	0.0103
1875.75	0.00821	1875.75	0.00765		1875.75	0.01055	1875.75	0.00708		1875.75	0.00995	1875.75	0.00832		1875.75	0.02389	1875.75	0.02335		1875.75	0.00966	1875.75	0.00625							1875.75	0.01284	1875.75	0.01114
1874.32	0.00762	1874.32	0.00737		1874.32	0.00933	1874.32	0.00711		1874.32	0.00886	1874.32	0.00742		1874.32	0.02218	1874.32	0.0203		1874.32	0.01033	1874.32	0.006							1874.32	0.01283	1874.32	0.01074
1872.89	0.00711	1872.89	0.00683		1872.89	0.00753	1872.89	0.00648		1872.89	0.00763	1872.89	0.00639		1872.89	0.02046	1872.89	0.01717		1872.89	0.01001	1872.89	0.0053							1872.89	0.0114	1872.89	0.00908
1871.46	0.00674	1871.46	0.00609		1871.46	0.00553	1871.46	0.00524		1871.46	0.00648	1871.46	0.0054		1871.46	0.01899	1871.46	0.01443		1871.46	0.00863	1871.46	0.00413							1871.46	0.00876	1871.46	0.00643
1870.03	0.00664	1870.03	0.00531		1870.03	0.00394	1870.03	0.0037		1870.03	0.00573	1870.03	0.00469		1870.03	0.01812	1870.03	0.01269		1870.03	0.00645	1870.03	0.00282							1870.03	0.00572	1870.03	0.0036
1868.6	0.00692	1868.6	0.00485		1868.6	0.00352	1868.6	0.00253		1868.6	0.00577	1868.6	0.00464		1868.6	0.01814	1868.6	0.01253		1868.6	0.00424	1868.6	0.00206							1868.6	0.00362	1868.6	0.00188
1867.17	0.00758	1867.17	0.00495		1867.17	0.00464	1867.17	0.00236		1867.17	0.0067	1867.17	0.00541		1867.17	0.01929	1867.17	0.01429		1867.17	0.00297	1867.17	0.00228							1867.17	0.00354	1867.17	0.0023
1865.74	0.00842	1865.74	0.00558		1865.74	0.00678	1865.74	0.00323		1865.74	0.00819	1865.74	0.00669		1865.74	0.02161	1865.74	0.01763		1865.74	0.00307	1865.74	0.00323							1865.74	0.00513	1865.74	0.00431
1864.31	0.00913	1864.31	0.00643		1864.31	0.009	1864.31	0.00469		1864.31	0.0097	1864.31	0.00795		1864.31	0.02458	1864.31	0.02165		1864.31	0.00426	1864.31	0.00427							1864.31	0.00731	1864.31	0.00674
1862.88	0.00949	1862.88	0.00719		1862.88	0.01055	1862.88	0.0062		1862.88	0.01074	1862.88	0.00874		1862.88	0.02732	1862.88	0.02543		1862.88	0.00596	1862.88	0.005							1862.88	0.0093	1862.88	0.0087
1861.45	0.00945	1861.45	0.00769		1861.45	0.01109	1861.45	0.00734		1861.45	0.01107	1861.45	0.00891		1861.45	0.02909	1861.45	0.02832		1861.45	0.00771	1861.45	0.00542							1861.45	0.01081	1861.45	0.00991
1860.02	0.00912	1860.02	0.00792		1860.02	0.01058	1860.02	0.00784		1860.02	0.01069	1860.02	0.00855		1860.02	0.02964	1860.02	0.02993		1860.02	0.0092	1860.02	0.00565							1860.02	0.01162	1860.02	0.0103
1858.59	0.00871	1858.59	0.00792		1858.59	0.0092	1858.59	0.00753		1858.59	0.00985	1858.59	0.00787		1858.59	0.02912	1858.59	0.03013		1858.59	0.01011	1858.59	0.00578							1858.59	0.01155	1858.59	0.00984
1857.17	0.00837	1857.17	0.00769		1857.17	0.00741	1857.17	0.0065		1857.17	0.00884	1857.17	0.00711		1857.17	0.0279	1857.17	0.02902		1857.17	0.01024	1857.17	0.00581							1857.17	0.01057	1857.17	0.00866
1855.74	0.00819	1855.74	0.00732		1855.74	0.00579	1855.74	0.00507		1855.74	0.00799	1855.74	0.00649		1855.74	0.0264	1855.74	0.02689		1855.74	0.00953	1855.74	0.0057							1855.74	0.00899	1855.74	0.00713
1854.31	0.00818	1854.31	0.00688		1854.31	0.00486	1854.31	0.00373		1854.31	0.00745	1854.31	0.00615		1854.31	0.02498	1854.31	0.02416		1854.31	0.00819	1854.31	0.00542							1854.31	0.00735	1854.31	0.00578
1852.88	0.00829	1852.88	0.00646		1852.88	0.00488	1852.88	0.00291		1852.88	0.0073	1852.88	0.00609		1852.88	0.02379	1852.88	0.02123		1852.88	0.00661	1852.88	0.005							1852.88	0.00615	1852.88	0.00502
1851.45	0.0084	1851.45	0.00611		1851.45	0.00576	1851.45	0.00281		1851.45	0.00743	1851.45	0.00623		1851.45	0.02282	1851.45	0.01848		1851.45	0.00526	1851.45	0.00449							1851.45	0.0056	1851.45	0.00497
1850.02	0.00838	1850.02	0.00581		1850.02	0.00712	1850.02	0.00339		1850.02	0.00773	1850.02	0.00646		1850.02	0.02193	1850.02	0.0162		1850.02	0.00444	1850.02	0.00393							1850.02	0.00562	1850.02	0.00543
1848.59	0.00818	1848.59	0.00558		1848.59	0.00845	1848.59	0.00439		1848.59	0.00808	1848.59	0.00667		1848.59	0.02103	1848.59	0.01468		1848.59	0.00423	1848.59	0.00337							1848.59	0.00603	1848.59	0.00609
1847.16	0.00795	1847.16	0.00551		1847.16	0.00922	1847.16	0.00543		1847.16	0.00845	1847.16	0.00685		1847.16	0.02049	1847.16	0.01439		1847.16	0.00462	1847.16	0.00292							1847.16	0.00668	1847.16	0.00668
1845.73	0.00788	1845.73	0.00576		1845.73	0.00907	1845.73	0.0061		1845.73	0.00874	1845.73	0.00693		1845.73	0.02091	1845.73	0.01585		1845.73	0.00563	1845.73	0.00276							1845.73	0.00747	1845.73	0.00703
1844.3	0.008	1844.3	0.00628		1844.3	0.00805	1844.3	0.00609		1844.3	0.00877	1844.3	0.00682		1844.3	0.02227	1844.3	0.01893		1844.3	0.0071	1844.3	0.00318							1844.3	0.00833	1844.3	0.0072
1842.87	0.00819	1842.87	0.00684		1842.87	0.00663	1842.87	0.00541		1842.87	0.0085	1842.87	0.00655		1842.87	0.02381	1842.87	0.02257		1842.87	0.00854	1842.87	0.00417							1842.87	0.00898	1842.87	0.00726
1841.44	0.00835	1841.44	0.00722		1841.44	0.00538	1841.44	0.00436		1841.44	0.00811	1841.44	0.00629		1841.44	0.02522	1841.44	0.02572		1841.44	0.00934	1841.44	0.00518							1841.44	0.00901	1841.44	0.00702
1840.01	0.00851	1840.01	0.00737		1840.01	0.00462	1840.01	0.00331		1840.01	0.00774	1840.01	0.00615		1840.01	0.02665	1840.01	0.02806		1840.01	0.00923	1840.01	0.00567							1840.01	0.0083	1840.01	0.00638
1838.58	0.00862	1838.58	0.00727		1838.58	0.0045	1838.58	0.00258		1838.58	0.00743	1838.58	0.00609		1838.58	0.02785	1838.58	0.02945		1838.58	0.00829	1838.58	0.0055							1838.58	0.00726	1838.58	0.00565
1837.15	0.00862	1837.15	0.00694		1837.15	0.00517	1837.15	0.00254		1837.15	0.00723	1837.15	0.00608		1837.15	0.02825	1837.15	0.02965		1837.15	0.0069	1837.15	0.00497							1837.15	0.00653	1837.15	0.0054
1835.72	0.00855	1835.72	0.00653		1835.72	0.00658	1835.72	0.00331		1835.72	0.00731	1835.72	0.00615		1835.72	0.02758	1835.72	0.02857		1835.72	0.00555	1835.72	0.0044							1835.72	0.00646	1835.72	0.0059
1834.29	0.00846	1834.29	0.00618		1834.29	0.0082	1834.29	0.00458		1834.29	0.00768	1834.29	0.0063		1834.29	0.02618	1834.29	0.02644		1834.29	0.00461	1834.29	0.00385							1834.29	0.00679	1834.29	0.00674
1832.86	0.00847	1832.86	0.00606		1832.86	0.00938	1832.86	0.00578		1832.86	0.00822	1832.86	0.00648		1832.86	0.02468	1832.86	0.02373		1832.86	0.00426	1832.86	0.00325							1832.86	0.00704	1832.86	0.00727
1831.43	0.00866	1831.43	0.00625		1831.43	0.00972	1831.43	0.0065		1831.43	0.00877	1831.43	0.00663		1831.43	0.02348	1831.43	0.02084		1831.43	0.00463	1831.43	0.00271							1831.43	0.00713	1831.43	0.00722
1830	0.00894	1830	0.00668		1830	0.00926	1830	0.00662		1830	0.00918	1830	0.00675		1830	0.02244	1830	0.01812		1830	0.00569	1830	0.00265							1830	0.0074	1830	0.00694
1828.57	0.00913	1828.57	0.00719		1828.57	0.00825	1828.57	0.00615		1828.57	0.00933	1828.57	0.00682		1828.57	0.02166	1828.57	0.01631		1828.57	0.00708	1828.57	0.00329							1828.57	0.00799	1828.57	0.00679
1827.14	0.00921	1827.14	0.00761		1827.14	0.00688	1827.14	0.00514		1827.14	0.00908	1827.14	0.0068		1827.14	0.02184	1827.14	0.0163		1827.14	0.00823	1827.14	0.00421							1827.14	0.00835	1827.14	0.00653
1825.71	0.00933	1825.71	0.00793		1825.71	0.0055	1825.71	0.00386		1825.71	0.00853	1825.71	0.00671		1825.71	0.02314	1825.71	0.01817		1825.71	0.00895	1825.71	0.00501							1825.71	0.00809	1825.71	0.00601
1824.28	0.00952	1824.28	0.00803		1824.28	0.00457	1824.28	0.00284		1824.28	0.00785	1824.28	0.00657		1824.28	0.02462	1824.28	0.02103		1824.28	0.00909	1824.28	0.00551							1824.28	0.00754	1824.28	0.00557
1822.85	0.00964	1822.85	0.00787		1822.85	0.00453	1822.85	0.00259		1822.85	0.00726	1822.85	0.0064		1822.85	0.02561	1822.85	0.02387		1822.85	0.00857	1822.85	0.00562							1822.85	0.00714	1822.85	0.00558
1821.42	0.00957	1821.42	0.00752		1821.42	0.00548	1821.42	0.00319		1821.42	0.00687	1821.42	0.00626		1821.42	0.0263	1821.42	0.02625		1821.42	0.00752	1821.42	0.00528							1821.42	0.00711	1821.42	0.00608
1819.99	0.00928	1819.99	0.00713		1819.99	0.00709	1819.99	0.00444		1819.99	0.00681	1819.99	0.00621		1819.99	0.027	1819.99	0.02802		1819.99	0.00634	1819.99	0.00457							1819.99	0.0073	1819.99	0.00686
1818.56	0.00887	1818.56	0.00682		1818.56	0.00888	1818.56	0.00594		1818.56	0.00711	1818.56	0.00628		1818.56	0.02759	1818.56	0.02908		1818.56	0.00546	1818.56	0.00384							1818.56	0.00757	1818.56	0.00772
1817.13	0.00847	1817.13	0.00669		1817.13	0.01025	1817.13	0.00719		1817.13	0.00776	1817.13	0.00647		1817.13	0.0278	1817.13	0.02928		1817.13	0.00517	1817.13	0.00339							1817.13	0.00777	1817.13	0.0084
1815.7	0.00821	1815.7	0.00675		1815.7	0.01071	1815.7	0.00773		1815.7	0.00858	1815.7	0.00671		1815.7	0.02748	1815.7	0.02858		1815.7	0.00546	1815.7	0.00335							1815.7	0.00783	1815.7	0.00861
1814.27	0.0082	1814.27	0.00701		1814.27	0.01003	1814.27	0.00733		1814.27	0.0093	1814.27	0.00695		1814.27	0.02685	1814.27	0.02714		1814.27	0.00615	1814.27	0.00357							1814.27	0.0077	1814.27	0.00818
1812.84	0.00846	1812.84	0.00745		1812.84	0.00834	1812.84	0.00607		1812.84	0.00968	1812.84	0.00717		1812.84	0.02624	1812.84	0.02523		1812.84	0.00704	1812.84	0.00395							1812.84	0.00745	1812.84	0.00722
1811.42	0.00897	1811.42	0.00799		1811.42	0.00617	1811.42	0.00442		1811.42	0.00958	1811.42	0.00734		1811.42	0.02574	1811.42	0.02312		1811.42	0.00796	1811.42	0.00449							1811.42	0.00723	1811.42	0.00618
1809.99	0.00952	1809.99	0.00844		1809.99	0.00429	1809.99	0.003		1809.99	0.00902	1809.99	0.00738		1809.99	0.02538	1809.99	0.02126		1809.99	0.00865	1809.99	0.00514							1809.99	0.00717	1809.99	0.00553
1808.56	0.00989	1808.56	0.00859		1808.56	0.00337	1808.56	0.00232		1808.56	0.0081	1808.56	0.00718		1808.56	0.02531	1808.56	0.0202		1808.56	0.00878	1808.56	0.00562							1808.56	0.00722	1808.56	0.00542
1807.13	0.00994	1807.13	0.00834		1807.13	0.00358	1807.13	0.00252		1807.13	0.00703	1807.13	0.00668		1807.13	0.02562	1807.13	0.02023		1807.13	0.00814	1807.13	0.00558							1807.13	0.00728	1807.13	0.00573
1805.7	0.00958	1805.7	0.00773		1805.7	0.00468	1805.7	0.00338		1805.7	0.006	1805.7	0.00594		1805.7	0.02611	1805.7	0.02116		1805.7	0.00676	1805.7	0.00488							1805.7	0.00728	1805.7	0.00625
1804.27	0.00885	1804.27	0.00692		1804.27	0.00621	1804.27	0.00453		1804.27	0.00526	1804.27	0.00516		1804.27	0.0265	1804.27	0.02265		1804.27	0.00497	1804.27	0.00368							1804.27	0.00719	1804.27	0.00678
1802.84	0.00788	1802.84	0.00612		1802.84	0.00773	1802.84	0.0056		1802.84	0.00504	1802.84	0.00459		1802.84	0.02657	1802.84	0.02432		1802.84	0.00336	1802.84	0.00242							1802.84	0.00695	1802.84	0.00712
1801.41	0.00695	1801.41	0.00553		1801.41	0.00883	1801.41	0.00632		1801.41	0.00552	1801.41	0.00446		1801.41	0.02609	1801.41	0.02574		1801.41	0.00257	1801.41	0.00167							1801.41	0.00663	1801.41	0.00716
1799.98	0.00629	1799.98	0.00532		1799.98	0.00923	1799.98	0.0065		1799.98	0.00661	1799.98	0.00485		1799.98	0.0249	1799.98	0.02642		1799.98	0.00291	1799.98	0.00184							1799.98	0.00637	1799.98	0.00689
1798.55	0.00602	1798.55	0.0055		1798.55	0.00878	1798.55	0.0061		1798.55	0.0079	1798.55	0.00563		1798.55	0.0233	1798.55	0.02622		1798.55	0.00407	1798.55	0.00278							1798.55	0.00627	1798.55	0.00637
1797.12	0.00607	1797.12	0.00591		1797.12	0.00749	1797.12	0.00517		1797.12	0.00891	1797.12	0.00652		1797.12	0.02185	1797.12	0.02535		1797.12	0.00531	1797.12	0.00386							1797.12	0.00614	1797.12	0.0056
1795.69	0.00633	1795.69	0.00635		1795.69	0.00557	1795.69	0.00387		1795.69	0.00927	1795.69	0.00715		1795.69	0.02101	1795.69	0.02415		1795.69	0.00602	1795.69	0.00452							1795.69	0.00573	1795.69	0.00459
1794.26	0.00682	1794.26	0.00665		1794.26	0.00359	1794.26	0.00262		1794.26	0.00885	1794.26	0.00726		1794.26	0.02114	1794.26	0.02296		1794.26	0.00603	1794.26	0.00451							1794.26	0.00509	1794.26	0.00356
1792.83	0.00762	1792.83	0.00683		1792.83	0.00255	1792.83	0.0021		1792.83	0.0078	1792.83	0.0068		1792.83	0.0222	1792.83	0.02202		1792.83	0.0056	1792.83	0.00409							1792.83	0.00482	1792.83	0.00321
1791.4	0.00853	1791.4	0.00689		1791.4	0.00326	1791.4	0.00278		1791.4	0.00654	1791.4	0.00596		1791.4	0.02358	1791.4	0.0214		1791.4	0.00508	1791.4	0.00375							1791.4	0.0056	1791.4	0.00421
1789.97	0.00914	1789.97	0.00685		1789.97	0.00543	1789.97	0.00433		1789.97	0.00549	1789.97	0.00507		1789.97	0.02482	1789.97	0.02124		1789.97	0.00471	1789.97	0.00367							1789.97	0.00712	1789.97	0.0062
1788.54	0.00918	1788.54	0.00671		1788.54	0.00797	1788.54	0.0059		1788.54	0.00488	1788.54	0.00441		1788.54	0.02611	1788.54	0.02166		1788.54	0.00453	1788.54	0.00365							1788.54	0.00831	1788.54	0.00798
1787.11	0.00863	1787.11	0.00646		1787.11	0.00991	1787.11	0.00689		1787.11	0.00476	1787.11	0.00408		1787.11	0.02753	1787.11	0.0226		1787.11	0.00454	1787.11	0.00354							1787.11	0.00852	1787.11	0.00877
1785.68	0.00763	1785.68	0.00612		1785.68	0.01082	1785.68	0.00714		1785.68	0.00517	1785.68	0.00415		1785.68	0.0286	1785.68	0.02384		1785.68	0.00476	1785.68	0.00352							1785.68	0.00792	1785.68	0.00857
1784.25	0.00653	1784.25	0.00585		1784.25	0.01059	1784.25	0.00673		1784.25	0.00616	1784.25	0.00471		1784.25	0.02901	1784.25	0.02524		1784.25	0.00524	1784.25	0.00384							1784.25	0.00703	1784.25	0.00776
1782.82	0.0058	1782.82	0.00592		1782.82	0.00934	1782.82	0.00586		1782.82	0.00763	1782.82	0.0058		1782.82	0.02901	1782.82	0.02676		1782.82	0.00606	1782.82	0.00453							1782.82	0.00626	1782.82	0.00666
1781.39	0.00576	1781.39	0.00644		1781.39	0.00748	1781.39	0.00485		1781.39	0.00923	1781.39	0.00725		1781.39	0.02879	1781.39	0.02817		1781.39	0.00715	1781.39	0.00547							1781.39	0.00588	1781.39	0.00562
1779.96	0.00635	1779.96	0.00722		1779.96	0.00569	1779.96	0.00411		1779.96	0.01056	1779.96	0.00866		1779.96	0.02796	1779.96	0.02888		1779.96	0.00821	1779.96	0.00648							1779.96	0.00609	1779.96	0.00508
1778.53	0.00727	1778.53	0.00795		1778.53	0.00458	1778.53	0.00384		1778.53	0.01123	1778.53	0.00956		1778.53	0.02626	1778.53	0.02843		1778.53	0.00877	1778.53	0.00719							1778.53	0.00678	1778.53	0.00519
1777.1	0.00816	1777.1	0.00833		1777.1	0.00425	1777.1	0.00389		1777.1	0.01092	1777.1	0.00953		1777.1	0.02401	1777.1	0.02686		1777.1	0.00845	1777.1	0.00717							1777.1	0.00744	1777.1	0.00558
1775.67	0.00875	1775.67	0.00822		1775.67	0.00447	1775.67	0.00392		1775.67	0.00952	1775.67	0.00841		1775.67	0.02185	1775.67	0.02458		1775.67	0.00719	1775.67	0.00614							1775.67	0.00754	1775.67	0.00575
1774.24	0.00889	1774.24	0.00761		1774.24	0.00494	1774.24	0.00373		1774.24	0.00736	1774.24	0.00641		1774.24	0.02039	1774.24	0.02218		1774.24	0.00524	1774.24	0.00424							1774.24	0.00689	1774.24	0.00554
1772.81	0.00875	1772.81	0.00676		1772.81	0.0059	1772.81	0.00364		1772.81	0.00538	1772.81	0.00429		1772.81	0.02021	1772.81	0.02041		1772.81	0.0033	1772.81	0.00242							1772.81	0.00613	1772.81	0.00549
1771.38	0.00862	1771.38	0.00624		1771.38	0.00732	1771.38	0.00399		1771.38	0.0048	1771.38	0.00324		1771.38	0.02153	1771.38	0.02005		1771.38	0.00235	1771.38	0.00177							1771.38	0.00603	1771.38	0.00609
1769.95	0.00867	1769.95	0.00641		1769.95	0.00849	1769.95	0.00466		1769.95	0.00608	1769.95	0.00396		1769.95	0.02433	1769.95	0.02148		1769.95	0.00287	1769.95	0.00266							1769.95	0.00646	1769.95	0.00701
1768.52	0.00879	1768.52	0.00721		1768.52	0.00865	1768.52	0.00515		1768.52	0.0086	1768.52	0.00614		1768.52	0.02794	1768.52	0.02415		1768.52	0.00458	1768.52	0.00449							1768.52	0.00696	1768.52	0.00752
1767.09	0.00878	1767.09	0.00819		1767.09	0.00769	1767.09	0.00515		1767.09	0.01125	1767.09	0.00878		1767.09	0.03119	1767.09	0.02699		1767.09	0.0066	1767.09	0.00639							1767.09	0.00711	1767.09	0.00736
1765.67	0.00867	1765.67	0.00907		1765.67	0.00612	1765.67	0.00474		1765.67	0.01326	1765.67	0.01107		1765.67	0.03341	1765.67	0.02937		1765.67	0.00817	1765.67	0.00771							1765.67	0.00697	1765.67	0.00685
1764.24	0.00887	1764.24	0.00996		1764.24	0.0046	1764.24	0.00418		1764.24	0.01441	1764.24	0.01264		1764.24	0.035	1764.24	0.03158		1764.24	0.00903	1764.24	0.00818							1764.24	0.00683	1764.24	0.00635
1762.81	0.00974	1762.81	0.01101		1762.81	0.00383	1762.81	0.00383		1762.81	0.01474	1762.81	0.01346		1762.81	0.03621	1762.81	0.03386		1762.81	0.0093	1762.81	0.00796							1762.81	0.00717	1762.81	0.0064
1761.38	0.01125	1761.38	0.01213		1761.38	0.0042	1761.38	0.00391		1761.38	0.01435	1761.38	0.01347		1761.38	0.03654	1761.38	0.0358		1761.38	0.00914	1761.38	0.00747							1761.38	0.0084	1761.38	0.00745
1759.95	0.01306	1759.95	0.01314		1759.95	0.00559	1759.95	0.00437		1759.95	0.01346	1759.95	0.01281		1759.95	0.03605	1759.95	0.03686		1759.95	0.00876	1759.95	0.007							1759.95	0.01008	1759.95	0.0092
1758.52	0.01491	1758.52	0.01398		1758.52	0.00741	1758.52	0.00496		1758.52	0.01247	1758.52	0.01183		1758.52	0.03545	1758.52	0.03686		1758.52	0.00835	1758.52	0.00659							1758.52	0.01134	1758.52	0.01086
1757.09	0.01657	1757.09	0.01463		1757.09	0.00913	1757.09	0.00553		1757.09	0.01179	1757.09	0.01092		1757.09	0.03469	1757.09	0.0357		1757.09	0.00803	1757.09	0.00635							1757.09	0.01185	1757.09	0.01198
1755.66	0.01769	1755.66	0.01495		1755.66	0.01023	1755.66	0.0059		1755.66	0.01169	1755.66	0.01043		1755.66	0.03324	1755.66	0.03348		1755.66	0.00775	1755.66	0.0064							1755.66	0.0117	1755.66	0.01248
1754.23	0.01801	1754.23	0.0149		1754.23	0.01017	1754.23	0.00585		1754.23	0.01224	1754.23	0.01054		1754.23	0.03153	1754.23	0.0309		1754.23	0.00752	1754.23	0.00659							1754.23	0.01087	1754.23	0.01205
1752.8	0.01755	1752.8	0.0145		1752.8	0.00867	1752.8	0.00514		1752.8	0.0133	1752.8	0.0112		1752.8	0.03038	1752.8	0.02865		1752.8	0.00742	1752.8	0.00669							1752.8	0.00929	1752.8	0.01039
1751.37	0.01649	1751.37	0.01384		1751.37	0.00608	1751.37	0.00385		1751.37	0.01467	1751.37	0.01223		1751.37	0.0299	1751.37	0.0269		1751.37	0.00764	1751.37	0.00667							1751.37	0.00745	1751.37	0.00785
1749.94	0.01529	1749.94	0.01318		1749.94	0.00359	1749.94	0.00254		1749.94	0.01608	1749.94	0.01341		1749.94	0.02999	1749.94	0.02591		1749.94	0.00841	1749.94	0.0068							1749.94	0.00633	1749.94	0.00554
1748.51	0.01457	1748.51	0.01298		1748.51	0.00263	1748.51	0.00192		1748.51	0.01718	1748.51	0.01447		1748.51	0.03109	1748.51	0.02632		1748.51	0.00983	1748.51	0.00723							1748.51	0.00668	1748.51	0.00466
1747.08	0.01472	1747.08	0.01339		1747.08	0.00363	1747.08	0.00219		1747.08	0.01771	1747.08	0.01506		1747.08	0.03339	1747.08	0.02819		1747.08	0.01158	1747.08	0.00775							1747.08	0.00837	1747.08	0.00546
1745.65	0.01571	1745.65	0.01413		1745.65	0.00594	1745.65	0.00301		1745.65	0.01767	1745.65	0.01495		1745.65	0.03637	1745.65	0.03088		1745.65	0.01304	1745.65	0.00802							1745.65	0.01069	1745.65	0.00727
1744.22	0.01729	1744.22	0.01479		1744.22	0.00864	1744.22	0.0039		1744.22	0.01726	1744.22	0.01413		1744.22	0.03922	1744.22	0.0337		1744.22	0.01372	1744.22	0.00787							1744.22	0.01299	1744.22	0.00929
1742.79	0.01921	1742.79	0.01515		1742.79	0.0111	1742.79	0.00467		1742.79	0.01677	1742.79	0.01286		1742.79	0.04141	1742.79	0.03616		1742.79	0.01366	1742.79	0.00742							1742.79	0.01471	1742.79	0.01086
1741.36	0.02117	1741.36	0.01519		1741.36	0.01295	1741.36	0.00529		1741.36	0.01646	1741.36	0.0116		1741.36	0.04265	1741.36	0.03785		1741.36	0.01335	1741.36	0.00702							1741.36	0.01549	1741.36	0.01156
1739.93	0.0227	1739.93	0.01488		1739.93	0.01392	1739.93	0.00571		1739.93	0.01648	1739.93	0.01074		1739.93	0.04247	1739.93	0.03824		1739.93	0.01321	1739.93	0.00694							1739.93	0.01529	1739.93	0.01133
1738.5	0.02334	1738.5	0.01415		1738.5	0.01388	1738.5	0.0058		1738.5	0.01674	1738.5	0.01041		1738.5	0.04072	1738.5	0.03705		1738.5	0.01324	1738.5	0.00713							1738.5	0.01439	1738.5	0.01036
1737.07	0.02301	1737.07	0.01314		1737.07	0.01292	1737.07	0.00536		1737.07	0.01717	1737.07	0.01049		1737.07	0.0385	1737.07	0.03471		1737.07	0.01336	1737.07	0.00716							1737.07	0.01295	1737.07	0.00863
1735.64	0.02193	1735.64	0.01197		1735.64	0.01149	1735.64	0.0044		1735.64	0.018	1735.64	0.01088		1735.64	0.03674	1735.64	0.03136		1735.64	0.01378	1735.64	0.00682							1735.64	0.01131	1735.64	0.00616
1734.21	0.02046	1734.21	0.01073		1734.21	0.01056	1734.21	0.00342		1734.21	0.01946	1734.21	0.01143		1734.21	0.03481	1734.21	0.02659		1734.21	0.01481	1734.21	0.00654							1734.21	0.01067	1734.21	0.00405
1732.78	0.01925	1732.78	0.00982		1732.78	0.01122	1732.78	0.00321		1732.78	0.0213	1732.78	0.01201		1732.78	0.03258	1732.78	0.02154		1732.78	0.01644	1732.78	0.00682							1732.78	0.01224	1732.78	0.00396
1731.35	0.01907	1731.35	0.00978		1731.35	0.01357	1731.35	0.00403		1731.35	0.02274	1731.35	0.01243		1731.35	0.03215	1731.35	0.019		1731.35	0.01825	1731.35	0.00743							1731.35	0.0155	1731.35	0.00608
1729.92	0.01991	1729.92	0.01048		1729.92	0.01673	1729.92	0.00544		1729.92	0.02326	1729.92	0.01244		1729.92	0.03452	1729.92	0.01967		1729.92	0.01976	1729.92	0.00785							1729.92	0.01901	1729.92	0.00914
1728.49	0.02118	1728.49	0.01122		1728.49	0.01961	1728.49	0.00681		1728.49	0.02283	1728.49	0.01189		1728.49	0.03827	1728.49	0.02209		1728.49	0.02064	1728.49	0.00795							1728.49	0.02175	1728.49	0.0119
1727.06	0.02241	1727.06	0.01155		1727.06	0.02137	1727.06	0.00765		1727.06	0.0218	1727.06	0.01089		1727.06	0.0419	1727.06	0.02497		1727.06	0.02081	1727.06	0.00782							1727.06	0.02319	1727.06	0.01358
1725.63	0.02349	1725.63	0.01145		1725.63	0.0217	1725.63	0.00786		1725.63	0.02067	1725.63	0.00981		1725.63	0.04494	1725.63	0.02791		1725.63	0.02048	1725.63	0.00764							1725.63	0.02316	1725.63	0.01384
1724.2	0.02432	1724.2	0.01102		1724.2	0.02084	1724.2	0.00755		1724.2	0.01985	1724.2	0.00905		1724.2	0.04703	1724.2	0.03074		1724.2	0.01999	1724.2	0.00762							1724.2	0.02201	1724.2	0.01294
1722.77	0.02465	1722.77	0.01036		1722.77	0.01923	1722.77	0.0069		1722.77	0.01947	1722.77	0.00878		1722.77	0.04772	1722.77	0.03302		1722.77	0.01958	1722.77	0.00782							1722.77	0.02023	1722.77	0.01132
1721.34	0.02425	1721.34	0.00948		1721.34	0.01717	1721.34	0.00587		1721.34	0.01928	1721.34	0.0088		1721.34	0.04719	1721.34	0.03438		1721.34	0.01924	1721.34	0.00783							1721.34	0.01799	1721.34	0.00915
1719.92	0.02295	1719.92	0.00829		1719.92	0.01486	1719.92	0.00436		1719.92	0.01893	1719.92	0.00871		1719.92	0.04567	1719.92	0.03439		1719.92	0.01882	1719.92	0.00708							1719.92	0.01527	1719.92	0.00632
1718.49	0.02081	1718.49	0.00676		1718.49	0.01305	1718.49	0.00285		1718.49	0.01841	1718.49	0.00823		1718.49	0.04257	1718.49	0.03227		1718.49	0.01839	1718.49	0.00562							1718.49	0.01276	1718.49	0.00349
1717.06	0.01858	1717.06	0.00547		1717.06	0.01319	1717.06	0.00246		1717.06	0.01834	1717.06	0.00785		1717.06	0.03775	1717.06	0.0278		1717.06	0.01842	1717.06	0.0044							1717.06	0.01229	1717.06	0.00234
1715.63	0.01749	1715.63	0.00531		1715.63	0.01574	1715.63	0.00384		1715.63	0.01912	1715.63	0.00807		1715.63	0.03339	1715.63	0.02281		1715.63	0.01918	1715.63	0.0043							1715.63	0.01484	1715.63	0.00431
1714.2	0.01775	1714.2	0.00624		1714.2	0.01906	1714.2	0.00599		1714.2	0.02013	1714.2	0.00863		1714.2	0.03155	1714.2	0.01944		1714.2	0.02014	1714.2	0.00514							1714.2	0.01877	1714.2	0.00806
1712.77	0.01851	1712.77	0.00733		1712.77	0.02127	1712.77	0.00757		1712.77	0.02052	1712.77	0.00885		1712.77	0.0317	1712.77	0.01763		1712.77	0.02055	1712.77	0.006							1712.77	0.02173	1712.77	0.01134
1711.34	0.01908	1711.34	0.0079		1711.34	0.02166	1711.34	0.00801		1711.34	0.01996	1711.34	0.00844		1711.34	0.03233	1711.34	0.01644		1711.34	0.02017	1711.34	0.00634							1711.34	0.02264	1711.34	0.01287
1709.91	0.01932	1709.91	0.00783		1709.91	0.02042	1709.91	0.00741		1709.91	0.01871	1709.91	0.00754		1709.91	0.03268	1709.91	0.01552		1709.91	0.0192	1709.91	0.00616							1709.91	0.02155	1709.91	0.01249
1708.48	0.01939	1708.48	0.00731		1708.48	0.01816	1708.48	0.00619		1708.48	0.01731	1708.48	0.0066		1708.48	0.03293	1708.48	0.01518		1708.48	0.01804	1708.48	0.00571							1708.48	0.01905	1708.48	0.01054
1707.05	0.01936	1707.05	0.00666		1707.05	0.0157	1707.05	0.00492		1707.05	0.0164	1707.05	0.00618		1707.05	0.0335	1707.05	0.01607		1707.05	0.01714	1707.05	0.00535							1707.05	0.01595	1707.05	0.00773
1705.62	0.01914	1705.62	0.00604		1705.62	0.01394	1705.62	0.0042		1705.62	0.0164	1705.62	0.00666		1705.62	0.03428	1705.62	0.01841		1705.62	0.01679	1705.62	0.00544							1705.62	0.01327	1705.62	0.00515
1704.19	0.01863	1704.19	0.00555		1704.19	0.01332	1704.19	0.0042		1704.19	0.01721	1704.19	0.00777		1704.19	0.03511	1704.19	0.02166		1704.19	0.01685	1704.19	0.00584							1704.19	0.01164	1704.19	0.00359
1702.76	0.0178	1702.76	0.0052		1702.76	0.01355	1702.76	0.00459		1702.76	0.01823	1702.76	0.00881		1702.76	0.03633	1702.76	0.02521		1702.76	0.01683	1702.76	0.00578							1702.76	0.01077	1702.76	0.00284
1701.33	0.01646	1701.33	0.00478		1701.33	0.0141	1701.33	0.00496		1701.33	0.01868	1701.33	0.00903		1701.33	0.03734	1701.33	0.02841		1701.33	0.01617	1701.33	0.0047							1701.33	0.01031	1701.33	0.0025
1699.9	0.01448	1699.9	0.00401		1699.9	0.01464	1699.9	0.00523		1699.9	0.01808	1699.9	0.00812		1699.9	0.03635	1699.9	0.03		1699.9	0.01465	1699.9	0.00295							1699.9	0.01049	1699.9	0.00282
1698.47	0.01263	1698.47	0.00338		1698.47	0.01495	1698.47	0.00551		1698.47	0.01667	1698.47	0.0067		1698.47	0.03378	1698.47	0.0295		1698.47	0.0131	1698.47	0.00174							1698.47	0.01142	1698.47	0.00413
1697.04	0.01202	1697.04	0.00379		1697.04	0.01478	1697.04	0.0058		1697.04	0.01515	1697.04	0.00583		1697.04	0.03214	1697.04	0.02773		1697.04	0.01277	1697.04	0.00206							1697.04	0.0126	1697.04	0.00604
1695.61	0.01258	1695.61	0.00512		1695.61	0.01415	1695.61	0.00607		1695.61	0.01394	1695.61	0.00586		1695.61	0.03152	1695.61	0.02522		1695.61	0.01376	1695.61	0.0039							1695.61	0.01363	1695.61	0.00813
1694.18	0.01334	1694.18	0.0064		1694.18	0.01324	1694.18	0.00618		1694.18	0.01314	1694.18	0.00638		1694.18	0.03038	1694.18	0.02221		1694.18	0.01503	1694.18	0.00624							1694.18	0.01411	1694.18	0.00968
1692.75	0.01376	1692.75	0.00704		1692.75	0.01213	1692.75	0.00598		1692.75	0.01274	1692.75	0.007		1692.75	0.02887	1692.75	0.0193		1692.75	0.01583	1692.75	0.00791							1692.75	0.01352	1692.75	0.00984
1691.32	0.01379	1691.32	0.00708		1691.32	0.01087	1691.32	0.00551		1691.32	0.01257	1691.32	0.00751		1691.32	0.02757	1691.32	0.01672		1691.32	0.01606	1691.32	0.00864							1691.32	0.01179	1691.32	0.00851
1689.89	0.01344	1689.89	0.0066		1689.89	0.00966	1689.89	0.00495		1689.89	0.01241	1689.89	0.00771		1689.89	0.02599	1689.89	0.01418		1689.89	0.01581	1689.89	0.00872							1689.89	0.00951	1689.89	0.00637
1688.46	0.01275	1688.46	0.00575		1688.46	0.00876	1688.46	0.00451		1688.46	0.01216	1688.46	0.00752		1688.46	0.02405	1688.46	0.01195		1688.46	0.01514	1688.46	0.00836							1688.46	0.0074	1688.46	0.00425
1687.03	0.01201	1687.03	0.00497		1687.03	0.00831	1687.03	0.00429		1687.03	0.01183	1687.03	0.00704		1687.03	0.02339	1687.03	0.01147		1687.03	0.01423	1687.03	0.00744							1687.03	0.00586	1687.03	0.00256
1685.6	0.01152	1685.6	0.00475		1685.6	0.00843	1685.6	0.00438		1685.6	0.01144	1685.6	0.00645		1685.6	0.02551	1685.6	0.01442		1685.6	0.01349	1685.6	0.00609							1685.6	0.00549	1685.6	0.0019
1684.17	0.01129	1684.17	0.00518		1684.17	0.00928	1684.17	0.00505		1684.17	0.01113	1684.17	0.00604		1684.17	0.02928	1684.17	0.02081		1684.17	0.01338	1684.17	0.00515							1684.17	0.00714	1684.17	0.00326
1682.74	0.01123	1682.74	0.00598		1682.74	0.01049	1682.74	0.00607		1682.74	0.01109	1682.74	0.00607		1682.74	0.0323	1682.74	0.02789		1682.74	0.01402	1682.74	0.00544							1682.74	0.0103	1682.74	0.00642
1681.31	0.01138	1681.31	0.0068		1681.31	0.01112	1681.31	0.00663		1681.31	0.01131	1681.31	0.00647		1681.31	0.03426	1681.31	0.03304		1681.31	0.01501	1681.31	0.00661							1681.31	0.01278	1681.31	0.0093
1679.88	0.01162	1679.88	0.0074		1679.88	0.01078	1679.88	0.00638		1679.88	0.0115	1679.88	0.0069		1679.88	0.03576	1679.88	0.03607		1679.88	0.01582	1679.88	0.00789							1679.88	0.01339	1679.88	0.0105
1678.45	0.01182	1678.45	0.00764		1678.45	0.00978	1678.45	0.00558		1678.45	0.01143	1678.45	0.00707		1678.45	0.03677	1678.45	0.03726		1678.45	0.01629	1678.45	0.0089							1678.45	0.01239	1678.45	0.01
1677.02	0.01206	1677.02	0.00758		1677.02	0.00878	1677.02	0.00477		1677.02	0.01124	1677.02	0.00701		1677.02	0.03674	1677.02	0.0363		1677.02	0.01667	1677.02	0.00965							1677.02	0.01047	1677.02	0.0082
1675.59	0.0124	1675.59	0.00725		1675.59	0.00837	1675.59	0.00446		1675.59	0.01123	1675.59	0.00684		1675.59	0.0348	1675.59	0.03262		1675.59	0.0172	1675.59	0.01032							1675.59	0.00845	1675.59	0.00582
1674.17	0.01279	1674.17	0.00665		1674.17	0.00878	1674.17	0.00477		1674.17	0.01163	1674.17	0.00659		1674.17	0.03083	1674.17	0.02667		1674.17	0.01777	1674.17	0.01085							1674.17	0.00714	1674.17	0.00375
1672.74	0.01332	1672.74	0.00605		1672.74	0.00978	1672.74	0.00539		1672.74	0.01249	1672.74	0.00634		1672.74	0.02684	1672.74	0.02055		1672.74	0.01826	1672.74	0.01087							1672.74	0.00686	1672.74	0.00251
1671.31	0.01434	1671.31	0.00598		1671.31	0.01117	1671.31	0.006		1671.31	0.01385	1671.31	0.00632		1671.31	0.0253	1671.31	0.01614		1671.31	0.01899	1671.31	0.01034							1671.31	0.00778	1671.31	0.0024
1669.88	0.01591	1669.88	0.00664		1669.88	0.01291	1669.88	0.00654		1669.88	0.01559	1669.88	0.00675		1669.88	0.02637	1669.88	0.01391		1669.88	0.02042	1669.88	0.00996							1669.88	0.01035	1669.88	0.004
1668.45	0.01753	1668.45	0.00767		1668.45	0.01463	1668.45	0.00692		1668.45	0.01723	1668.45	0.00752		1668.45	0.02835	1668.45	0.01359		1668.45	0.02235	1668.45	0.01031							1668.45	0.01418	1668.45	0.00716
1667.02	0.01865	1667.02	0.00855		1667.02	0.01558	1667.02	0.00686		1667.02	0.01822	1667.02	0.00825		1667.02	0.03042	1667.02	0.01488		1667.02	0.02398	1667.02	0.01103							1667.02	0.01746	1667.02	0.01012
1665.59	0.01931	1665.59	0.00907		1665.59	0.01547	1665.59	0.00616		1665.59	0.01853	1665.59	0.00863		1665.59	0.03331	1665.59	0.0179		1665.59	0.02495	1665.59	0.01146							1665.59	0.01881	1665.59	0.01128
1664.16	0.01991	1664.16	0.0094		1664.16	0.0148	1664.16	0.00513		1664.16	0.01855	1664.16	0.00873		1664.16	0.03754	1664.16	0.02282		1664.16	0.02571	1664.16	0.0117							1664.16	0.01842	1664.16	0.0105
1662.73	0.02069	1662.73	0.00964		1662.73	0.0146	1662.73	0.0045		1662.73	0.01883	1662.73	0.00884		1662.73	0.04224	1662.73	0.0291		1662.73	0.02692	1662.73	0.01244							1662.73	0.01751	1662.73	0.00885
1661.3	0.02162	1661.3	0.00977		1661.3	0.01567	1661.3	0.00495		1661.3	0.01972	1661.3	0.00914		1661.3	0.0459	1661.3	0.03494		1661.3	0.02879	1661.3	0.01395							1661.3	0.0172	1661.3	0.00753
1659.87	0.02252	1659.87	0.0097		1659.87	0.01781	1659.87	0.0063		1659.87	0.02107	1659.87	0.00957		1659.87	0.04788	1659.87	0.03871		1659.87	0.03083	1659.87	0.01554							1659.87	0.01759	1659.87	0.00683
1658.44	0.02317	1658.44	0.00929		1658.44	0.02011	1658.44	0.00769		1658.44	0.02238	1658.44	0.00972		1658.44	0.0485	1658.44	0.04017		1658.44	0.03233	1658.44	0.01634							1658.44	0.01801	1658.44	0.00623
1657.01	0.02348	1657.01	0.00851		1657.01	0.02166	1657.01	0.00828		1657.01	0.02315	1657.01	0.00933		1657.01	0.04846	1657.01	0.03982		1657.01	0.03299	1657.01	0.01587							1657.01	0.01782	1657.01	0.00513
1655.58	0.02372	1655.58	0.0076		1655.58	0.02208	1655.58	0.00762		1655.58	0.02332	1655.58	0.00843		1655.58	0.04819	1655.58	0.03765		1655.58	0.03312	1655.58	0.01419							1655.58	0.01717	1655.58	0.00358
1654.15	0.02441	1654.15	0.00692		1654.15	0.02166	1654.15	0.00596		1654.15	0.02338	1654.15	0.00745		1654.15	0.04656	1654.15	0.03227		1654.15	0.03331	1654.15	0.01208							1654.15	0.01752	1654.15	0.00282
1652.72	0.02569	1652.72	0.00663		1652.72	0.02129	1652.72	0.00435		1652.72	0.02407	1652.72	0.00705		1652.72	0.04161	1652.72	0.02313		1652.72	0.03376	1652.72	0.01092							1652.72	0.02032	1652.72	0.00436
1651.29	0.02691	1651.29	0.00659		1651.29	0.02127	1651.29	0.00351		1651.29	0.02523	1651.29	0.00734		1651.29	0.03531	1651.29	0.01443		1651.29	0.03399	1651.29	0.01097							1651.29	0.02395	1651.29	0.00707
1649.86	0.02758	1649.86	0.00672		1649.86	0.02098	1649.86	0.00307		1649.86	0.02594	1649.86	0.00776		1649.86	0.03228	1649.86	0.01008		1649.86	0.03366	1649.86	0.0111							1649.86	0.02529	1649.86	0.00804
1648.43	0.02773	1648.43	0.00714		1648.43	0.0202	1648.43	0.00271		1648.43	0.02565	1648.43	0.00782		1648.43	0.03401	1648.43	0.01032		1648.43	0.03328	1648.43	0.01105							1648.43	0.02375	1648.43	0.00652
1647	0.02763	1647	0.00793		1647	0.01987	1647	0.00308		1647	0.02477	1647	0.00772		1647	0.03834	1647	0.01405		1647	0.03375	1647	0.01193							1647	0.02136	1647	0.00441
1645.57	0.02756	1645.57	0.00889		1645.57	0.02111	1645.57	0.00484		1645.57	0.02444	1645.57	0.00804		1645.57	0.04247	1645.57	0.01959		1645.57	0.03533	1645.57	0.01426							1645.57	0.0205	1645.57	0.00397
1644.14	0.0277	1644.14	0.00963		1644.14	0.02353	1644.14	0.00728		1644.14	0.02516	1644.14	0.00889		1644.14	0.04569	1644.14	0.02521		1644.14	0.03722	1644.14	0.01676							1644.14	0.02132	1644.14	0.00518
1642.71	0.02785	1642.71	0.00985		1642.71	0.02584	1642.71	0.00918		1642.71	0.02635	1642.71	0.00978		1642.71	0.04836	1642.71	0.03028		1642.71	0.03849	1642.71	0.01815							1642.71	0.02254	1642.71	0.00663
1641.28	0.02769	1641.28	0.00942		1641.28	0.02708	1641.28	0.00988		1641.28	0.0272	1641.28	0.01016		1641.28	0.05022	1641.28	0.03437		1641.28	0.03874	1641.28	0.01815							1641.28	0.02331	1641.28	0.00745
1639.85	0.02715	1639.85	0.00843		1639.85	0.02682	1639.85	0.00916		1639.85	0.02725	1639.85	0.0098		1639.85	0.05084	1639.85	0.037		1639.85	0.03798	1639.85	0.01699							1639.85	0.02341	1639.85	0.00745
1638.42	0.02665	1638.42	0.00737		1638.42	0.02515	1638.42	0.0072		1638.42	0.02659	1638.42	0.00897		1638.42	0.0506	1638.42	0.03793		1638.42	0.03666	1638.42	0.01501							1638.42	0.02292	1638.42	0.00675
1636.99	0.02694	1636.99	0.00703		1636.99	0.02289	1636.99	0.00482		1636.99	0.02589	1636.99	0.00836		1636.99	0.04995	1636.99	0.03688		1636.99	0.03566	1636.99	0.01307							1636.99	0.02251	1636.99	0.00611
1635.56	0.02833	1635.56	0.0078		1635.56	0.02145	1635.56	0.00334		1635.56	0.02589	1635.56	0.0086		1635.56	0.0485	1635.56	0.03348		1635.56	0.03572	1635.56	0.01244							1635.56	0.02319	1635.56	0.00666
1634.13	0.03024	1634.13	0.00922		1634.13	0.02163	1634.13	0.00347		1634.13	0.0267	1634.13	0.00951		1634.13	0.04626	1634.13	0.02893		1634.13	0.03668	1634.13	0.01342							1634.13	0.02488	1634.13	0.00826
1632.7	0.03176	1632.7	0.01049		1632.7	0.02287	1632.7	0.00463		1632.7	0.02768	1632.7	0.0104		1632.7	0.04451	1632.7	0.025		1632.7	0.0377	1632.7	0.01487							1632.7	0.02623	1632.7	0.00939
1631.27	0.03256	1631.27	0.01123		1631.27	0.02436	1631.27	0.00593		1631.27	0.02835	1631.27	0.01083		1631.27	0.04407	1631.27	0.02209		1631.27	0.03833	1631.27	0.0158							1631.27	0.02645	1631.27	0.00922
1629.84	0.0327	1629.84	0.01138		1629.84	0.02579	1629.84	0.00698		1629.84	0.02865	1629.84	0.01076		1629.84	0.0445	1629.84	0.01987		1629.84	0.03858	1629.84	0.01607							1629.84	0.02583	1629.84	0.0081
1628.42	0.03225	1628.42	0.0109		1628.42	0.02717	1628.42	0.0077		1628.42	0.02878	1628.42	0.01033		1628.42	0.04487	1628.42	0.01823		1628.42	0.03858	1628.42	0.01596							1628.42	0.02518	1628.42	0.00692
1626.99	0.03147	1626.99	0.00989		1626.99	0.0283	1626.99	0.00799		1626.99	0.02906	1626.99	0.00984		1626.99	0.04507	1626.99	0.01769		1626.99	0.03837	1626.99	0.01554							1626.99	0.02509	1626.99	0.00631
1625.56	0.03085	1625.56	0.00872		1625.56	0.02873	1625.56	0.00761		1625.56	0.02972	1625.56	0.00957		1625.56	0.0461	1625.56	0.01919		1625.56	0.03799	1625.56	0.01471							1625.56	0.02561	1625.56	0.00629
1624.13	0.03076	1624.13	0.00781		1624.13	0.02828	1624.13	0.00661		1624.13	0.0308	1624.13	0.00972		1624.13	0.04847	1624.13	0.02318		1624.13	0.03754	1624.13	0.01355							1624.13	0.0267	1624.13	0.00682
1622.7	0.0311	1622.7	0.0073		1622.7	0.02736	1622.7	0.00548		1622.7	0.03202	1622.7	0.01024		1622.7	0.05107	1622.7	0.02851		1622.7	0.03714	1622.7	0.01251							1622.7	0.02824	1622.7	0.00798
1621.27	0.03157	1621.27	0.00718		1621.27	0.02647	1621.27	0.00468		1621.27	0.03287	1621.27	0.01081		1621.27	0.05274	1621.27	0.0332		1621.27	0.0367	1621.27	0.01179							1621.27	0.02953	1621.27	0.00922
1619.84	0.03211	1619.84	0.00746		1619.84	0.02573	1619.84	0.00422		1619.84	0.0329	1619.84	0.01105		1619.84	0.054	1619.84	0.03642		1619.84	0.03615	1619.84	0.01106							1619.84	0.02957	1619.84	0.00944
1618.41	0.03286	1618.41	0.00821		1618.41	0.02532	1618.41	0.00416		1618.41	0.03212	1618.41	0.01081		1618.41	0.05537	1618.41	0.03821		1618.41	0.03565	1618.41	0.01028							1618.41	0.0282	1618.41	0.00825
1616.98	0.03382	1616.98	0.00934		1616.98	0.02581	1616.98	0.00485		1616.98	0.03096	1616.98	0.01037		1616.98	0.05582	1616.98	0.038		1616.98	0.03558	1616.98	0.0101							1616.98	0.02656	1616.98	0.00668
1615.55	0.03467	1615.55	0.01049		1615.55	0.02749	1615.55	0.0063		1615.55	0.0302	1615.55	0.01017		1615.55	0.05439	1615.55	0.03557		1615.55	0.03614	1615.55	0.01105							1615.55	0.02603	1615.55	0.00613
1614.12	0.03511	1614.12	0.01123		1614.12	0.02957	1614.12	0.00776		1614.12	0.03029	1614.12	0.01044		1614.12	0.05209	1614.12	0.03219		1614.12	0.03697	1614.12	0.01244							1614.12	0.02667	1614.12	0.00666
1612.69	0.03505	1612.69	0.01133		1612.69	0.03098	1612.69	0.00842		1612.69	0.03102	1612.69	0.01093		1612.69	0.05035	1612.69	0.02884		1612.69	0.03745	1612.69	0.01324							1612.69	0.02757	1612.69	0.00739
1611.26	0.03453	1611.26	0.01079		1611.26	0.03119	1611.26	0.008		1611.26	0.03192	1611.26	0.01131		1611.26	0.04926	1611.26	0.02564		1611.26	0.03725	1611.26	0.01305							1611.26	0.02823	1611.26	0.00783
1609.83	0.0337	1609.83	0.0098		1609.83	0.03028	1609.83	0.00684		1609.83	0.03275	1609.83	0.01151		1609.83	0.04839	1609.83	0.02279		1609.83	0.03644	1609.83	0.01215							1609.83	0.02872	1609.83	0.00816
1608.4	0.03287	1608.4	0.00877		1608.4	0.02877	1608.4	0.00557		1608.4	0.03341	1608.4	0.01167		1608.4	0.04787	1608.4	0.02106		1608.4	0.03538	1608.4	0.01101							1608.4	0.02921	1608.4	0.00869
1606.97	0.03235	1606.97	0.00812		1606.97	0.02732	1606.97	0.00474		1606.97	0.03378	1606.97	0.01185		1606.97	0.04815	1606.97	0.02112		1606.97	0.03441	1606.97	0.01001							1606.97	0.02956	1606.97	0.00932
1605.54	0.03227	1605.54	0.00799		1605.54	0.02631	1605.54	0.00456		1605.54	0.03365	1605.54	0.01195		1605.54	0.04942	1605.54	0.02304		1605.54	0.03368	1605.54	0.00929							1605.54	0.02943	1605.54	0.00963
1604.11	0.03258	1604.11	0.00836		1604.11	0.02592	1604.11	0.00491		1604.11	0.03296	1604.11	0.01183		1604.11	0.05144	1604.11	0.02639		1604.11	0.0332	1604.11	0.00885							1604.11	0.02873	1604.11	0.00936
1602.68	0.03316	1602.68	0.00912		1602.68	0.0262	1602.68	0.00561		1602.68	0.03189	1602.68	0.01151		1602.68	0.05373	1602.68	0.03046		1602.68	0.033	1602.68	0.0088							1602.68	0.02781	1602.68	0.0087
1601.25	0.03385	1601.25	0.01004		1601.25	0.02702	1601.25	0.00637		1601.25	0.0308	1601.25	0.01114		1601.25	0.05578	1601.25	0.03445		1601.25	0.03308	1601.25	0.00916							1601.25	0.02715	1601.25	0.00807
1599.82	0.03444	1599.82	0.01081		1599.82	0.02805	1599.82	0.00682		1599.82	0.03004	1599.82	0.01084		1599.82	0.05724	1599.82	0.03754		1599.82	0.03332	1599.82	0.00975							1599.82	0.02698	1599.82	0.00768
1598.39	0.03469	1598.39	0.01117		1598.39	0.02882	1598.39	0.0067		1598.39	0.02977	1598.39	0.01068		1598.39	0.05788	1598.39	0.03921		1598.39	0.03347	1598.39	0.01021							1598.39	0.02718	1598.39	0.00755
1596.96	0.03445	1596.96	0.01096		1596.96	0.02904	1596.96	0.00606		1596.96	0.03006	1596.96	0.01071		1596.96	0.05751	1596.96	0.03918		1596.96	0.0334	1596.96	0.01031							1596.96	0.02759	1596.96	0.00764
1595.53	0.0338	1595.53	0.01026		1595.53	0.02869	1595.53	0.00525		1595.53	0.03088	1595.53	0.01095		1595.53	0.05608	1595.53	0.03748		1595.53	0.0331	1595.53	0.0101							1595.53	0.02815	1595.53	0.00805
1594.1	0.03296	1594.1	0.00935		1594.1	0.02799	1594.1	0.00467		1594.1	0.03204	1594.1	0.01139		1594.1	0.05384	1594.1	0.03455		1594.1	0.0327	1594.1	0.00974							1594.1	0.02877	1594.1	0.00874
1592.67	0.03226	1592.67	0.00853		1592.67	0.02718	1592.67	0.00454		1592.67	0.03318	1592.67	0.01186		1592.67	0.05141	1592.67	0.03111		1592.67	0.03226	1592.67	0.00933							1592.67	0.02919	1592.67	0.00944
1591.24	0.03187	1591.24	0.00806		1591.24	0.02652	1591.24	0.00486		1591.24	0.03388	1591.24	0.01218		1591.24	0.04937	1591.24	0.02793		1591.24	0.03175	1591.24	0.00889							1591.24	0.02911	1591.24	0.00983
1589.81	0.03176	1589.81	0.00804		1589.81	0.02614	1589.81	0.00548		1589.81	0.03384	1589.81	0.01225		1589.81	0.04807	1589.81	0.02556		1589.81	0.03116	1589.81	0.00849							1589.81	0.02853	1589.81	0.00981
1588.38	0.0318	1588.38	0.00847		1588.38	0.02607	1588.38	0.00621		1588.38	0.03298	1588.38	0.01211		1588.38	0.04762	1588.38	0.0244		1588.38	0.03053	1588.38	0.00828							1588.38	0.02768	1588.38	0.00954
1586.95	0.03183	1586.95	0.00923		1586.95	0.02621	1586.95	0.00681		1586.95	0.03146	1586.95	0.01186		1586.95	0.04805	1586.95	0.02465		1586.95	0.02997	1586.95	0.0084							1586.95	0.0268	1586.95	0.00924
1585.52	0.03177	1585.52	0.01014		1585.52	0.02637	1585.52	0.00711		1585.52	0.02971	1585.52	0.01166		1585.52	0.04917	1585.52	0.02618		1585.52	0.02952	1585.52	0.00885							1585.52	0.02611	1585.52	0.00911
1584.09	0.03154	1584.09	0.01093		1584.09	0.02644	1584.09	0.00711		1584.09	0.02827	1584.09	0.01164		1584.09	0.05052	1584.09	0.0286		1584.09	0.02914	1584.09	0.00953							1584.09	0.02572	1584.09	0.00927
1582.67	0.03107	1582.67	0.01132		1582.67	0.0263	1582.67	0.00687		1582.67	0.02746	1582.67	0.01179		1582.67	0.05146	1582.67	0.03124		1582.67	0.02871	1582.67	0.0102							1582.67	0.02559	1582.67	0.00966
1581.24	0.03026	1581.24	0.01111		1581.24	0.02575	1581.24	0.0064		1581.24	0.02722	1581.24	0.0119		1581.24	0.05151	1581.24	0.03337		1581.24	0.02805	1581.24	0.01049							1581.24	0.02541	1581.24	0.00993
1579.81	0.02911	1579.81	0.01028		1579.81	0.02462	1579.81	0.00568		1579.81	0.02722	1579.81	0.01174		1579.81	0.05087	1579.81	0.03473		1579.81	0.02702	1579.81	0.01005							1579.81	0.02467	1579.81	0.00959
1578.38	0.02781	1578.38	0.00909		1578.38	0.02302	1578.38	0.00492		1578.38	0.02729	1578.38	0.01133		1578.38	0.0501	1578.38	0.03544		1578.38	0.0257	1578.38	0.00887							1578.38	0.0231	1578.38	0.00847
1576.95	0.0266	1576.95	0.00796		1576.95	0.02156	1576.95	0.00475		1576.95	0.02748	1576.95	0.01097		1576.95	0.04898	1576.95	0.03532		1576.95	0.02433	1576.95	0.00755							1576.95	0.02126	1576.95	0.00731
1575.52	0.02567	1575.52	0.00722		1575.52	0.02102	1575.52	0.0056		1575.52	0.02777	1575.52	0.01096		1575.52	0.04668	1575.52	0.03399		1575.52	0.02322	1575.52	0.00696							1575.52	0.0203	1575.52	0.00723
1574.09	0.0251	1574.09	0.00701		1574.09	0.02133	1574.09	0.00692		1574.09	0.02773	1574.09	0.0112		1574.09	0.04365	1574.09	0.0321		1574.09	0.02251	1574.09	0.00716							1574.09	0.02036	1574.09	0.00806
1572.66	0.0248	1572.66	0.00731		1572.66	0.02162	1572.66	0.00771		1572.66	0.02678	1572.66	0.01132		1572.66	0.04159	1572.66	0.03049		1572.66	0.02209	1572.66	0.00744							1572.66	0.02035	1572.66	0.00855
1571.23	0.02461	1571.23	0.00808		1571.23	0.02133	1571.23	0.00765		1571.23	0.02476	1571.23	0.01115		1571.23	0.04088	1571.23	0.0292		1571.23	0.02181	1571.23	0.00753							1571.23	0.0197	1571.23	0.00827
1569.8	0.02443	1569.8	0.00913		1569.8	0.02071	1569.8	0.00713		1569.8	0.02229	1569.8	0.01086		1569.8	0.04015	1569.8	0.02774		1569.8	0.02154	1569.8	0.00792							1569.8	0.01903	1569.8	0.00806
1568.37	0.02434	1568.37	0.01012		1568.37	0.02039	1568.37	0.00683		1568.37	0.02074	1568.37	0.01089		1568.37	0.03877	1568.37	0.0262		1568.37	0.02127	1568.37	0.00892							1568.37	0.01917	1568.37	0.00876
1566.94	0.02442	1566.94	0.01076		1566.94	0.02051	1566.94	0.00705		1566.94	0.02098	1566.94	0.01148		1566.94	0.03792	1566.94	0.02542		1566.94	0.02098	1566.94	0.01006							1566.94	0.01991	1566.94	0.00999
1565.51	0.02441	1565.51	0.01091		1565.51	0.02067	1565.51	0.00761		1565.51	0.02251	1565.51	0.0124		1565.51	0.03818	1565.51	0.02568		1565.51	0.02052	1565.51	0.01075							1565.51	0.0205	1565.51	0.01099
[truncated: 676 more rows]
